# Supplementary material for: High-Resolution Carbon Intensity of United States Natural Gas Supply
Source: Research Square preprint supplement (doi:10.21203/rs.3.rs-5776078/v1), 2025-04-10
Supplement: Supplementary file 1 [file 1013f4b86e2e442fb6e8b7b6.xlsx]

## Sheet: Contents
Extended Data for:
High-Resolution Carbon Intensity of United States Natural Gas Supply
Zhihao(Spencer) Zhang, Jeffery Rutherford, James Littlefield, Farah Ramadan, Mohamed Ali Saafi, Bo Ren, Muhammad Y Jabbar, Mohammad S. Masnadi, Adam Brandt
Open Sourced Input Data	Table 1	Kansas oil and gas production and well counts by county. Accessed on 09/24/2023 at https://chasm.kgs.ku.edu/ords/oil.ogop5.FileOpYear.
	Table 2	Michigan oil and gas well information and location. Accessed on 09/24/2023 at https://www.egle.state.mi.us/dataminer/. (Available upon request due to space limits)
	Table 3	Michigan oil and gas production data. Accessed on 09/24/2023 at https://www.egle.state.mi.us/dataminer/. (Available upon request due to space limits)
	Table 4	Global oil and gas upstream flaring point data from Earth Obseravtions Group. Accessed on 07/2023 at https://eogdata.mines.edu/products/vnf/global_gas_flare.html#data_download.
	Table 5	The Federal lease blocks for the Offshore Gulf of Mexico OCS Region. Accessed May 6 2024 at https://www.data.boem.gov/Main/Mapping.aspx#ascii.
	Table 6	The estimated full gas composition data by county, statistically synthesized with data from GHGRP and USGS. Acquired November 7 2023 from (Burdeau et al., working paper).
	Table 7	The basin-level methane loss rates synthesized based on aerial measurements and statistical model from (Sherwin et al., 2024).
	Table 8	The US electricity generation mix by source in 2022, U.S. Environmental Protection Agency.
Synthesized Intermediate Results	Table 9	The summarized 2022 flare volume by US oil and gas production field.
	Table 10	Basin characteristics and similarity-matched methane loss rates.
	Table 11	The summarized methane loss rates by US oil and gas production field.
	Table 12	The summarized US gas field OPGEE input for year 2022.
	Table 13	The summarized US oil field OPGEE input for year 2022.
	Table 14	The summarized US offshore Gulf of Mexico OPGEE field input for year 2022.
	Table 15	The optimization result for the US natural gas production county to processing plant state flow.
	Table 16	The Leontief result of the US natural gas state-to-state processing-to-delivery input output flow.
	Table 17	The US state natural gas processing centroid. (Littlefield et al., 2018)
	Table 18	The US state natural gas delivery centroid. (Littlefield et al., 2018)
Carbon Intensity Results	Table 19	The summarized midstream transmission CI and emission factor by natural gas flow route from production state/region to delivery state/region.
	Table 20	The summarized midstream transmission CI and emission factor by production state/region.
	Table 21	The summarized midstream transmission CI and emission factor by delivery state/region.
	Table 22	The field-level well-through-transmission CI results.
	Table 23	The basin-level well-through-transmission CI results for the top 15 gas-producing basins.
	Table 24	The basin-level well-through-transmission CI results for all gas-producing basins.
	Table 25	The field-level well-through-transmission CI results for four proposed mitigation scenarios.

## Sheet: Table 1 Kansas production
COUNTY	YEAR	MONTH	OIL_PRODUCTION	OIL_WELLS	GAS_PRODUCTION	GAS_WELLS
Allen	2022	1	17626	2371	15120	83
Allen	2022	2	14196	2371	14158	83
Allen	2022	3	20700	2371	15315	83
Allen	2022	4	17467	2371	13495	83
Allen	2022	5	18639	2371	11612	83
Allen	2022	6	16810	2371	8703	83
Allen	2022	7	17021	2371	8279	83
Allen	2022	8	19113	2371	9787	83
Allen	2022	9	17489	2371	9722	83
Allen	2022	10	18591	2371	11427	83
Allen	2022	11	18152	2371	15293	83
Allen	2022	12	16816	2371	14177	83
Anderson	2022	1	9719	1750
Anderson	2022	2	8887	1750
Anderson	2022	3	9780	1750
Anderson	2022	4	9057	1750
Anderson	2022	5	9477	1750
Anderson	2022	6	8107	1750
Anderson	2022	7	9320	1750
Anderson	2022	8	9540	1750
Anderson	2022	9	10781	1750
Anderson	2022	10	10534	1750
Anderson	2022	11	9484	1750
Anderson	2022	12	9556	1750
Atchison	2022	1
Atchison	2022	2
Atchison	2022	3
Atchison	2022	4
Atchison	2022	5
Atchison	2022	6
Atchison	2022	7
Atchison	2022	8
Atchison	2022	9
Atchison	2022	10
Atchison	2022	11
Atchison	2022	12
Barber	2022	1	65788	1220	841330	1308
Barber	2022	2	59912	1220	747841	1308
Barber	2022	3	76195	1220	812094	1308
Barber	2022	4	73129	1220	817465	1308
Barber	2022	5	83745	1220	856552	1308
Barber	2022	6	83923	1220	826520	1308
Barber	2022	7	96697	1220	848687	1308
Barber	2022	8	99973	1220	872312	1308
Barber	2022	9	82610	1220	877859	1308
Barber	2022	10	84330	1220	898091	1308
Barber	2022	11	81842	1220	886976	1308
Barber	2022	12	85344	1220	865400	1308
Barton	2022	1	118787	1841	14036	19
Barton	2022	2	112824	1841	12658	19
Barton	2022	3	123181	1841	12398	19
Barton	2022	4	120707	1841	9004	19
Barton	2022	5	121036	1841	13499	19
Barton	2022	6	132048	1841	12603	19
Barton	2022	7	119163	1841	11345	19
Barton	2022	8	125857	1841	11149	19
Barton	2022	9	118084	1841	15349	19
Barton	2022	10	121704	1841	22670	19
Barton	2022	11	116867	1841	20220	19
Barton	2022	12	114484	1841	21142	19
Bourbon	2022	1	5588	744
Bourbon	2022	2	5504	744
Bourbon	2022	3	6332	744
Bourbon	2022	4	5277	744
Bourbon	2022	5	6152	744
Bourbon	2022	6	5774	744
Bourbon	2022	7	5821	744
Bourbon	2022	8	6317	744
Bourbon	2022	9	5622	744
Bourbon	2022	10	6203	744
Bourbon	2022	11	6045	744
Bourbon	2022	12	5978	744
Brown	2022	1	347	8
Brown	2022	2	320	8
Brown	2022	3	337	8
Brown	2022	4	329	8
Brown	2022	5	497	8
Brown	2022	6	155	8
Brown	2022	7	469	8
Brown	2022	8	311	8
Brown	2022	9	555	8
Brown	2022	10	247	8
Brown	2022	11	401	8
Brown	2022	12	243	8
Butler	2022	1	53821	1191
Butler	2022	2	52173	1191
Butler	2022	3	65683	1191
Butler	2022	4	57492	1191
Butler	2022	5	57745	1191
Butler	2022	6	56919	1191
Butler	2022	7	59697	1191
Butler	2022	8	60047	1191
Butler	2022	9	56986	1191
Butler	2022	10	59679	1191
Butler	2022	11	59648	1191
Butler	2022	12	59234	1191
Chase	2022	1	2088	57	178	27
Chase	2022	2	1885	57	82	27
Chase	2022	3	1672	57
Chase	2022	4	1556	57
Chase	2022	5	1893	57
Chase	2022	6	1957	57
Chase	2022	7	2045	57
Chase	2022	8	1451	57
Chase	2022	9	2170	57
Chase	2022	10	1854	57
Chase	2022	11	1609	57
Chase	2022	12	2478	57
Chautauqua	2022	1	10228	1058	3567	16
Chautauqua	2022	2	8995	1058	3261	16
Chautauqua	2022	3	12861	1058	3934	16
Chautauqua	2022	4	10914	1058	3936	16
Chautauqua	2022	5	12583	1058	3859	16
Chautauqua	2022	6	11950	1058	3543	16
Chautauqua	2022	7	11051	1058	3692	16
Chautauqua	2022	8	12813	1058	3666	16
Chautauqua	2022	9	9192	1058	3865	16
Chautauqua	2022	10	11590	1058	3849	16
Chautauqua	2022	11	11651	1058	3607	16
Chautauqua	2022	12	9452	1058	3406	16
Cheyenne	2022	1	15764	127	93366	563
Cheyenne	2022	2	18504	127	90976	563
Cheyenne	2022	3	27918	127	98604	563
Cheyenne	2022	4	24731	127	90508	563
Cheyenne	2022	5	25648	127	94600	563
Cheyenne	2022	6	17915	127	91537	563
Cheyenne	2022	7	16719	127	95191	563
Cheyenne	2022	8	20600	127	94436	563
Cheyenne	2022	9	17612	127	92039	563
Cheyenne	2022	10	21216	127	94141	563
Cheyenne	2022	11	18784	127	91291	563
Cheyenne	2022	12	15197	127	90615	563
Clark	2022	1	11588	105	81796	144
Clark	2022	2	10861	105	75435	144
Clark	2022	3	14025	105	84643	144
Clark	2022	4	13563	105	82540	144
Clark	2022	5	10983	105	81500	144
Clark	2022	6	13428	105	81804	144
Clark	2022	7	10689	105	85378	144
Clark	2022	8	14166	105	85047	144
Clark	2022	9	13448	105	84353	144
Clark	2022	10	14388	105	85257	144
Clark	2022	11	12778	105	82832	144
Clark	2022	12	12838	105	82131	144
Clay	2022	1
Clay	2022	2
Clay	2022	3	328	6
Clay	2022	4
Clay	2022	5
Clay	2022	6	157	6
Clay	2022	7	158	6
Clay	2022	8	182	6
Clay	2022	9	160	6
Clay	2022	10	160	6
Clay	2022	11
Clay	2022	12
Coffey	2022	1	15616	1547
Coffey	2022	2	14392	1547
Coffey	2022	3	15320	1547
Coffey	2022	4	15916	1547
Coffey	2022	5	16518	1547
Coffey	2022	6	15294	1547
Coffey	2022	7	16095	1547
Coffey	2022	8	15676	1547
Coffey	2022	9	16510	1547
Coffey	2022	10	16244	1547
Coffey	2022	11	15923	1547
Coffey	2022	12	14206	1547
Comanche	2022	1	12757	202	201486	314
Comanche	2022	2	11028	202	188065	314
Comanche	2022	3	14956	202	203248	314
Comanche	2022	4	13046	202	205265	314
Comanche	2022	5	15007	202	237907	314
Comanche	2022	6	15802	202	231282	314
Comanche	2022	7	12283	202	245482	314
Comanche	2022	8	16021	202	259680	314
Comanche	2022	9	15700	202	257470	314
Comanche	2022	10	15090	202	276651	314
Comanche	2022	11	17905	202	276562	314
Comanche	2022	12	13805	202	238946	314
Cowley	2022	1	44239	728	205	1
Cowley	2022	2	38169	728	201	1
Cowley	2022	3	51752	728	207	1
Cowley	2022	4	52352	728	205	1
Cowley	2022	5	46422	728	205	1
Cowley	2022	6	48342	728	202	1
Cowley	2022	7	46163	728	205	1
Cowley	2022	8	47363	728	207	1
Cowley	2022	9	44062	728	210	1
Cowley	2022	10	48638	728	210	1
Cowley	2022	11	41673	728	207	1
Cowley	2022	12	47287	728	210	1
Crawford	2022	1	1334	632
Crawford	2022	2	1543	632
Crawford	2022	3	1733	632
Crawford	2022	4	1666	632
Crawford	2022	5	2382	632
Crawford	2022	6	2135	632
Crawford	2022	7	1423	632
Crawford	2022	8	1736	632
Crawford	2022	9	1296	632
Crawford	2022	10	1424	632
Crawford	2022	11	1690	632
Crawford	2022	12	1762	632
Decatur	2022	1	14816	165
Decatur	2022	2	17096	165
Decatur	2022	3	20066	165
Decatur	2022	4	18173	165
Decatur	2022	5	17229	165
Decatur	2022	6	19568	165
Decatur	2022	7	17249	165
Decatur	2022	8	19238	165
Decatur	2022	9	18826	165
Decatur	2022	10	16566	165
Decatur	2022	11	14649	165
Decatur	2022	12	12450	165
Dickinson	2022	1	491	24
Dickinson	2022	2	564	24
Dickinson	2022	3	538	24
Dickinson	2022	4	393	24
Dickinson	2022	5	701	24
Dickinson	2022	6	524	24
Dickinson	2022	7	456	24
Dickinson	2022	8	624	24
Dickinson	2022	9	217	24
Dickinson	2022	10	865	24
Dickinson	2022	11
Dickinson	2022	12	235	24
Douglas	2022	1	2356	389
Douglas	2022	2	2060	389
Douglas	2022	3	1600	389
Douglas	2022	4	2580	389
Douglas	2022	5	2100	389
Douglas	2022	6	1876	389
Douglas	2022	7	2006	389
Douglas	2022	8	2555	389
Douglas	2022	9	2588	389
Douglas	2022	10	2437	389
Douglas	2022	11	2171	389
Douglas	2022	12	1671	389
Edwards	2022	1	9399	176	41890	105
Edwards	2022	2	7858	176	37923	105
Edwards	2022	3	10288	176	46347	105
Edwards	2022	4	8400	176	46671	105
Edwards	2022	5	9268	176	47776	105
Edwards	2022	6	10540	176	48927	105
Edwards	2022	7	10953	176	50107	105
Edwards	2022	8	10183	176	50680	105
Edwards	2022	9	9235	176	48534	105
Edwards	2022	10	9317	176	50019	105
Edwards	2022	11	7399	176	52795	105
Edwards	2022	12	7904	176	47962	105
Elk	2022	1	3843	243	123	1
Elk	2022	2	4096	243	110	1
Elk	2022	3	3702	243	125	1
Elk	2022	4	4106	243	128	1
Elk	2022	5	3573	243	129	1
Elk	2022	6	3528	243
Elk	2022	7	4998	243
Elk	2022	8	4357	243
Elk	2022	9	3483	243
Elk	2022	10	3570	243
Elk	2022	11	4176	243
Elk	2022	12	2793	243
Ellis	2022	1	174089	2544
Ellis	2022	2	170567	2544
Ellis	2022	3	192965	2544
Ellis	2022	4	178882	2544
Ellis	2022	5	189237	2544
Ellis	2022	6	197159	2544
Ellis	2022	7	185125	2544
Ellis	2022	8	192524	2544
Ellis	2022	9	180815	2544
Ellis	2022	10	175422	2544
Ellis	2022	11	179763	2544
Ellis	2022	12	170604	2544
Ellsworth	2022	1	17198	320	5516	13
Ellsworth	2022	2	15632	320	6268	13
Ellsworth	2022	3	19128	320	9727	13
Ellsworth	2022	4	16327	320	9286	13
Ellsworth	2022	5	16370	320	8683	13
Ellsworth	2022	6	19013	320	8359	13
Ellsworth	2022	7	17679	320	8315	13
Ellsworth	2022	8	18623	320	8702	13
Ellsworth	2022	9	16035	320	7106	13
Ellsworth	2022	10	17993	320	9617	13
Ellsworth	2022	11	17247	320	9639	13
Ellsworth	2022	12	18288	320	9021	13
Finney	2022	1	112664	560	767180	1071
Finney	2022	2	102879	560	676603	1071
Finney	2022	3	118702	560	757549	1071
Finney	2022	4	113498	560	758862	1071
Finney	2022	5	121296	560	781352	1071
Finney	2022	6	114344	560	746952	1071
Finney	2022	7	115431	560	762472	1071
Finney	2022	8	115920	560	784651	1071
Finney	2022	9	108835	560	669407	1071
Finney	2022	10	108213	560	794795	1071
Finney	2022	11	107130	560	733649	1071
Finney	2022	12	108362	560	717899	1071
Ford	2022	1	24822	117	80041	62
Ford	2022	2	25960	117	75105	62
Ford	2022	3	28422	117	81353	62
Ford	2022	4	25614	117	74541	62
Ford	2022	5	25226	117	93165	62
Ford	2022	6	25824	117	88594	62
Ford	2022	7	27892	117	94598	62
Ford	2022	8	29641	117	80606	62
Ford	2022	9	26985	117	79443	62
Ford	2022	10	24554	117	63850	62
Ford	2022	11	25479	117	71621	62
Ford	2022	12	23875	117	61774	62
Franklin	2022	1	7928	2042
Franklin	2022	2	8401	2042
Franklin	2022	3	8948	2042
Franklin	2022	4	9031	2042
Franklin	2022	5	8744	2042
Franklin	2022	6	8566	2042
Franklin	2022	7	9393	2042
Franklin	2022	8	10232	2042
Franklin	2022	9	9118	2042
Franklin	2022	10	8327	2042
Franklin	2022	11	9305	2042
Franklin	2022	12	7425	2042
Geary	2022	1	492	9
Geary	2022	2	324	9
Geary	2022	3	323	9
Geary	2022	4	486	9
Geary	2022	5	323	9
Geary	2022	6	483	9
Geary	2022	7	321	9
Geary	2022	8	576	9
Geary	2022	9	606	9
Geary	2022	10	491	9
Geary	2022	11	325	9
Geary	2022	12	329	9
Gove	2022	1	34573	422
Gove	2022	2	37853	422
Gove	2022	3	43166	422
Gove	2022	4	46452	422
Gove	2022	5	49427	422
Gove	2022	6	53630	422
Gove	2022	7	52620	422
Gove	2022	8	57935	422
Gove	2022	9	47510	422
Gove	2022	10	47332	422
Gove	2022	11	49534	422
Gove	2022	12	47433	422
Graham	2022	1	62944	861
Graham	2022	2	61632	861
Graham	2022	3	64436	861
Graham	2022	4	58726	861
Graham	2022	5	60205	861
Graham	2022	6	67107	861
Graham	2022	7	62911	861
Graham	2022	8	63161	861
Graham	2022	9	64634	861
Graham	2022	10	66401	861
Graham	2022	11	65943	861
Graham	2022	12	61734	861
Grant	2022	1	12728	57	1564121	1763
Grant	2022	2	10532	57	1400732	1763
Grant	2022	3	10662	57	1565844	1763
Grant	2022	4	10866	57	1554998	1763
Grant	2022	5	12187	57	1588569	1763
Grant	2022	6	11427	57	1552739	1763
Grant	2022	7	11884	57	1584935	1763
Grant	2022	8	11623	57	1607955	1763
Grant	2022	9	12033	57	1414007	1763
Grant	2022	10	13777	57	1654486	1763
Grant	2022	11	13178	57	1533165	1763
Grant	2022	12	13333	57	1486443	1763
Gray	2022	1	6596	72	24888	19
Gray	2022	2	3966	72	21424	19
Gray	2022	3	6723	72	23431	19
Gray	2022	4	6783	72	21723	19
Gray	2022	5	7047	72	23031	19
Gray	2022	6	5884	72	21467	19
Gray	2022	7	6236	72	23105	19
Gray	2022	8	5283	72	23028	19
Gray	2022	9	5920	72	18875	19
Gray	2022	10	5835	72	27633	19
Gray	2022	11	5822	72	25339	19
Gray	2022	12	5034	72	24609	19
Greeley	2022	1	8423	41	28717	65
Greeley	2022	2	6901	41	26310	65
Greeley	2022	3	8213	41	34269	65
Greeley	2022	4	7048	41	27714	65
Greeley	2022	5	7107	41	21032	65
Greeley	2022	6	7319	41	19750	65
Greeley	2022	7	6857	41	26847	65
Greeley	2022	8	7748	41	33115	65
Greeley	2022	9	7740	41	35515	65
Greeley	2022	10	7469	41	39557	65
Greeley	2022	11	6582	41	34393	65
Greeley	2022	12	5784	41	34263	65
Greenwood	2022	1	23713	1181
Greenwood	2022	2	21860	1181
Greenwood	2022	3	26361	1181
Greenwood	2022	4	24663	1181
Greenwood	2022	5	23769	1181
Greenwood	2022	6	24322	1181
Greenwood	2022	7	25093	1181
Greenwood	2022	8	24029	1181
Greenwood	2022	9	25084	1181
Greenwood	2022	10	25430	1181
Greenwood	2022	11	25319	1181
Greenwood	2022	12	25768	1181
Hamilton	2022	1	644	3	196409	270
Hamilton	2022	2	653	3	170129	270
Hamilton	2022	3	785	3	194911	270
Hamilton	2022	4	635	3	192340	270
Hamilton	2022	5	641	3	195852	270
Hamilton	2022	6	793	3	193329	270
Hamilton	2022	7	500	3	196986	270
Hamilton	2022	8	950	3	202597	270
Hamilton	2022	9	838	3	186736	270
Hamilton	2022	10	886	3	209426	270
Hamilton	2022	11	866	3	198091	270
Hamilton	2022	12	649	3	190835	270
Harper	2022	1	20437	454	662413	558
Harper	2022	2	21904	454	607534	558
Harper	2022	3	22876	454	693915	558
Harper	2022	4	23405	454	676760	558
Harper	2022	5	20715	454	754544	558
Harper	2022	6	22655	454	667124	558
Harper	2022	7	20483	454	675717	558
Harper	2022	8	23923	454	711803	558
Harper	2022	9	19133	454	689820	558
Harper	2022	10	19548	454	712561	558
Harper	2022	11	22355	454	646041	558
Harper	2022	12	19954	454	616583	558
Harvey	2022	1	6797	118	10876	24
Harvey	2022	2	6432	118	9684	24
Harvey	2022	3	7501	118	10855	24
Harvey	2022	4	6807	118	10683	24
Harvey	2022	5	7332	118	11426	24
Harvey	2022	6	7025	118	10538	24
Harvey	2022	7	6208	118	11305	24
Harvey	2022	8	7928	118	11366	24
Harvey	2022	9	6275	118	11108	24
Harvey	2022	10	6888	118	10913	24
Harvey	2022	11	6124	118	9990	24
Harvey	2022	12	6901	118	9801	24
Haskell	2022	1	136503	491	785397	1139
Haskell	2022	2	125981	491	695612	1139
Haskell	2022	3	153046	491	788249	1139
Haskell	2022	4	154247	491	769521	1139
Haskell	2022	5	154442	491	776635	1139
Haskell	2022	6	144949	491	738763	1139
Haskell	2022	7	144357	491	772701	1139
Haskell	2022	8	153631	491	793420	1139
Haskell	2022	9	140975	491	689224	1139
Haskell	2022	10	135811	491	779861	1139
Haskell	2022	11	137223	491	724120	1139
Haskell	2022	12	137840	491	699961	1139
Hodgeman	2022	1	31064	260	43535	19
Hodgeman	2022	2	30491	260	40392	19
Hodgeman	2022	3	32526	260	41199	19
Hodgeman	2022	4	31730	260	39935	19
Hodgeman	2022	5	35771	260	39644	19
Hodgeman	2022	6	34880	260	39331	19
Hodgeman	2022	7	36137	260	43156	19
Hodgeman	2022	8	38345	260	42101	19
Hodgeman	2022	9	35363	260	41000	19
Hodgeman	2022	10	33658	260	37388	19
Hodgeman	2022	11	35259	260	43010	19
Hodgeman	2022	12	29399	260	40072	19
Jackson	2022	1	164	5
Jackson	2022	2	158	5
Jackson	2022	3
Jackson	2022	4	161	5
Jackson	2022	5
Jackson	2022	6	163	5
Jackson	2022	7	162	5
Jackson	2022	8
Jackson	2022	9	161	5
Jackson	2022	10
Jackson	2022	11	162	5
Jackson	2022	12
Jefferson	2022	1
Jefferson	2022	2	296	50
Jefferson	2022	3	143	50
Jefferson	2022	4	141	50
Jefferson	2022	5	148	50
Jefferson	2022	6	463	50
Jefferson	2022	7	461	50
Jefferson	2022	8	659	50
Jefferson	2022	9	588	50
Jefferson	2022	10	431	50
Jefferson	2022	11	363	50
Jefferson	2022	12	140	50
Johnson	2022	1	8597	1016	4254	35
Johnson	2022	2	8113	1016	3760	35
Johnson	2022	3	9477	1016	4271	35
Johnson	2022	4	8511	1016	4467	35
Johnson	2022	5	8666	1016	4733	35
Johnson	2022	6	8987	1016	4548	35
Johnson	2022	7	9652	1016	4874	35
Johnson	2022	8	8906	1016	4920	35
Johnson	2022	9	7682	1016	4924	35
Johnson	2022	10	8595	1016	4773	35
Johnson	2022	11	7337	1016	4325	35
Johnson	2022	12	6762	1016	4177	35
Kearny	2022	1	35093	108	1360006	1628
Kearny	2022	2	36167	108	1199727	1628
Kearny	2022	3	36789	108	1320591	1628
Kearny	2022	4	33068	108	1322579	1628
Kearny	2022	5	35521	108	1386630	1628
Kearny	2022	6	34277	108	1334391	1628
Kearny	2022	7	33276	108	1384744	1628
Kearny	2022	8	33902	108	1407895	1628
Kearny	2022	9	31879	108	1280792	1628
Kearny	2022	10	32424	108	1381859	1628
Kearny	2022	11	28062	108	1289779	1628
Kearny	2022	12	28708	108	1261952	1628
Kingman	2022	1	26198	517	305548	615
Kingman	2022	2	23503	517	275692	615
Kingman	2022	3	28853	517	315804	615
Kingman	2022	4	26167	517	312660	615
Kingman	2022	5	26561	517	322346	615
Kingman	2022	6	25078	517	315361	615
Kingman	2022	7	23664	517	317328	615
Kingman	2022	8	27675	517	330113	615
Kingman	2022	9	22131	517	323842	615
Kingman	2022	10	27520	517	332389	615
Kingman	2022	11	22517	517	312965	615
Kingman	2022	12	22979	517	295444	615
Kiowa	2022	1	17751	241	126816	156
Kiowa	2022	2	16154	241	115655	156
Kiowa	2022	3	20145	241	132992	156
Kiowa	2022	4	19926	241	130739	156
Kiowa	2022	5	16424	241	127790	156
Kiowa	2022	6	20195	241	133377	156
Kiowa	2022	7	17855	241	128285	156
Kiowa	2022	8	20389	241	135329	156
Kiowa	2022	9	19183	241	132284	156
Kiowa	2022	10	22203	241	137526	156
Kiowa	2022	11	18062	241	142175	156
Kiowa	2022	12	16750	241	129421	156
Labette	2022	1	229	75	136692	500
Labette	2022	2	253	75	137208	500
Labette	2022	3	269	75	148052	500
Labette	2022	4	160	75	144698	500
Labette	2022	5	527	75	144698	500
Labette	2022	6	485	75	141692	500
Labette	2022	7	216	75	145813	500
Labette	2022	8	365	75	145134	500
Labette	2022	9	923	75	143601	500
Labette	2022	10	332	75	148842	500
Labette	2022	11	259	75	142929	500
Labette	2022	12	244	75	142779	500
Lane	2022	1	42831	389
Lane	2022	2	46516	389
Lane	2022	3	52592	389
Lane	2022	4	48693	389
Lane	2022	5	52711	389
Lane	2022	6	50358	389
Lane	2022	7	45825	389
Lane	2022	8	52658	389
Lane	2022	9	42780	389
Lane	2022	10	46436	389
Lane	2022	11	46766	389
Lane	2022	12	42403	389
Leavenworth	2022	1	2153	125
Leavenworth	2022	2	1855	125
Leavenworth	2022	3	2796	125
Leavenworth	2022	4	2518	125
Leavenworth	2022	5	3110	125
Leavenworth	2022	6	2485	125
Leavenworth	2022	7	3399	125
Leavenworth	2022	8	2939	125
Leavenworth	2022	9	2940	125
Leavenworth	2022	10	2799	125
Leavenworth	2022	11	2309	125
Leavenworth	2022	12	1828	125
Linn	2022	1	5106	986
Linn	2022	2	4022	986
Linn	2022	3	5671	986
Linn	2022	4	5297	986
Linn	2022	5	6010	986
Linn	2022	6	5213	986
Linn	2022	7	5893	986
Linn	2022	8	5374	986
Linn	2022	9	5200	986
Linn	2022	10	5557	986
Linn	2022	11	5820	986
Linn	2022	12	5374	986
Logan	2022	1	38689	401
Logan	2022	2	36022	401
Logan	2022	3	42855	401
Logan	2022	4	40409	401
Logan	2022	5	38959	401
Logan	2022	6	41270	401
Logan	2022	7	36675	401
Logan	2022	8	44787	401
Logan	2022	9	40711	401
Logan	2022	10	42997	401
Logan	2022	11	37556	401
Logan	2022	12	36582	401
Lyon	2022	1	6354	90
Lyon	2022	2	6594	90
Lyon	2022	3	7620	90
Lyon	2022	4	6935	90
Lyon	2022	5	6720	90
Lyon	2022	6	6709	90
Lyon	2022	7	5628	90
Lyon	2022	8	6706	90
Lyon	2022	9	5937	90
Lyon	2022	10	6385	90
Lyon	2022	11	4829	90
Lyon	2022	12	5936	90
McPherson	2022	1	23846	527	1003	5
McPherson	2022	2	24971	527	776	5
McPherson	2022	3	24915	527	1077	5
McPherson	2022	4	25556	527	1095	5
McPherson	2022	5	22340	527	1071	5
McPherson	2022	6	27430	527	1326	5
McPherson	2022	7	21246	527	1262	5
McPherson	2022	8	24991	527	1326	5
McPherson	2022	9	20070	527	1359	5
McPherson	2022	10	26875	527	1263	5
McPherson	2022	11	23434	527	1178	5
McPherson	2022	12	25560	527	1059	5
Marion	2022	1	7932	211	10066	135
Marion	2022	2	7314	211	9659	135
Marion	2022	3	8133	211	9757	135
Marion	2022	4	8095	211	10412	135
Marion	2022	5	8331	211	10788	135
Marion	2022	6	9496	211	8687	135
Marion	2022	7	7829	211	9092	135
Marion	2022	8	7500	211	8183	135
Marion	2022	9	6758	211	8511	135
Marion	2022	10	9193	211	7875	135
Marion	2022	11	7277	211	7241	135
Marion	2022	12	7724	211	5870	135
Meade	2022	1	11215	134	150737	265
Meade	2022	2	10045	134	134927	265
Meade	2022	3	12254	134	145562	265
Meade	2022	4	13084	134	142085	265
Meade	2022	5	12804	134	168857	265
Meade	2022	6	12757	134	158936	265
Meade	2022	7	10077	134	163396	265
Meade	2022	8	11332	134	161611	265
Meade	2022	9	10864	134	136529	265
Meade	2022	10	11976	134	176321	265
Meade	2022	11	10168	134	151004	265
Meade	2022	12	8914	134	138571	265
Miami	2022	1	12448	2501
Miami	2022	2	12041	2501
Miami	2022	3	14896	2501
Miami	2022	4	13784	2501
Miami	2022	5	13267	2501
Miami	2022	6	14700	2501
Miami	2022	7	14139	2501
Miami	2022	8	14867	2501
Miami	2022	9	15378	2501
Miami	2022	10	15170	2501
Miami	2022	11	15038	2501
Miami	2022	12	12743	2501
Montgomery	2022	1	4826	1027	250328	924
Montgomery	2022	2	4135	1027	237700	924
Montgomery	2022	3	6347	1027	266269	924
Montgomery	2022	4	6185	1027	256157	924
Montgomery	2022	5	5220	1027	260576	924
Montgomery	2022	6	6337	1027	252284	924
Montgomery	2022	7	6414	1027	260551	924
Montgomery	2022	8	5193	1027	260083	924
Montgomery	2022	9	5556	1027	250048	924
Montgomery	2022	10	4711	1027	258761	924
Montgomery	2022	11	5188	1027	251508	924
Montgomery	2022	12	4592	1027	246820	924
Morris	2022	1	3184	73
Morris	2022	2	3653	73
Morris	2022	3	3573	73
Morris	2022	4	3998	73
Morris	2022	5	3362	73
Morris	2022	6	3072	73
Morris	2022	7	2833	73
Morris	2022	8	3638	73
Morris	2022	9	3019	73
Morris	2022	10	2998	73
Morris	2022	11	3241	73
Morris	2022	12	3159	73
Morton	2022	1	18815	113	747185	1050
Morton	2022	2	20242	113	657515	1050
Morton	2022	3	21283	113	741098	1050
Morton	2022	4	20854	113	727662	1050
Morton	2022	5	18825	113	747025	1050
Morton	2022	6	19805	113	711819	1050
Morton	2022	7	19125	113	749643	1050
Morton	2022	8	19563	113	744851	1050
Morton	2022	9	19162	113	701229	1050
Morton	2022	10	17164	113	747388	1050
Morton	2022	11	17684	113	702827	1050
Morton	2022	12	18136	113	689209	1050
Nemaha	2022	1	2605	22
Nemaha	2022	2	2635	22
Nemaha	2022	3	2456	22
Nemaha	2022	4	3281	22
Nemaha	2022	5	3255	22
Nemaha	2022	6	3058	22
Nemaha	2022	7	2897	22
Nemaha	2022	8	2417	22
Nemaha	2022	9	2407	22
Nemaha	2022	10	3081	22
Nemaha	2022	11	3110	22
Nemaha	2022	12	2586	22
Neosho	2022	1	1144	660	328113	1005
Neosho	2022	2	810	660	291587	1005
Neosho	2022	3	2041	660	332580	1005
Neosho	2022	4	2048	660	322593	1005
Neosho	2022	5	1905	660	331168	1005
Neosho	2022	6	1749	660	313432	1005
Neosho	2022	7	1652	660	319079	1005
Neosho	2022	8	1908	660	322193	1005
Neosho	2022	9	1081	660	311107	1005
Neosho	2022	10	1880	660	320619	1005
Neosho	2022	11	1378	660	305777	1005
Neosho	2022	12	1401	660	297089	1005
Ness	2022	1	104804	1143	1893	2
Ness	2022	2	104072	1143	2114	2
Ness	2022	3	119027	1143	2127	2
Ness	2022	4	119986	1143	2196	2
Ness	2022	5	120094	1143	2867	2
Ness	2022	6	125960	1143	2614	2
Ness	2022	7	114528	1143	3483	2
Ness	2022	8	127948	1143	2384	2
Ness	2022	9	108698	1143	2395	2
Ness	2022	10	118365	1143	2270	2
Ness	2022	11	107970	1143	2026	2
Ness	2022	12	105128	1143	1973	2
Norton	2022	1	12955	151
Norton	2022	2	14644	151
Norton	2022	3	14996	151
Norton	2022	4	13419	151
Norton	2022	5	13428	151
Norton	2022	6	15487	151
Norton	2022	7	14443	151
Norton	2022	8	15766	151
Norton	2022	9	12686	151
Norton	2022	10	14268	151
Norton	2022	11	12781	151
Norton	2022	12	11475	151
Osage	2022	1
Osage	2022	2
Osage	2022	3	167	4
Osage	2022	4	155	4
Osage	2022	5
Osage	2022	6	174	4
Osage	2022	7	143	4
Osage	2022	8
Osage	2022	9
Osage	2022	10
Osage	2022	11	302	4
Osage	2022	12
Osborne	2022	1	8802	129
Osborne	2022	2	9303	129
Osborne	2022	3	9644	129
Osborne	2022	4	7793	129
Osborne	2022	5	9394	129
Osborne	2022	6	9163	129
Osborne	2022	7	8497	129
Osborne	2022	8	9640	129
Osborne	2022	9	8065	129
Osborne	2022	10	8797	129
Osborne	2022	11	8551	129
Osborne	2022	12	8996	129
Pawnee	2022	1	10530	153	31802	71
Pawnee	2022	2	12029	153	27750	71
Pawnee	2022	3	12461	153	33736	71
Pawnee	2022	4	13491	153	35180	71
Pawnee	2022	5	12951	153	36089	71
Pawnee	2022	6	13236	153	32463	71
Pawnee	2022	7	11510	153	28827	71
Pawnee	2022	8	13274	153	31650	71
Pawnee	2022	9	10673	153	31694	71
Pawnee	2022	10	12015	153	27022	71
Pawnee	2022	11	11127	153	26588	71
Pawnee	2022	12	10930	153	23300	71
Phillips	2022	1	17908	306
Phillips	2022	2	16794	306
Phillips	2022	3	17916	306
Phillips	2022	4	18110	306
Phillips	2022	5	20204	306
Phillips	2022	6	20422	306
Phillips	2022	7	18866	306
Phillips	2022	8	20351	306
Phillips	2022	9	18658	306
Phillips	2022	10	20749	306
Phillips	2022	11	17041	306
Phillips	2022	12	17594	306
Pottawatomie	2022	1
Pottawatomie	2022	2
Pottawatomie	2022	3
Pottawatomie	2022	4
Pottawatomie	2022	5
Pottawatomie	2022	6
Pottawatomie	2022	7	313	1
Pottawatomie	2022	8
Pottawatomie	2022	9
Pottawatomie	2022	10
Pottawatomie	2022	11
Pottawatomie	2022	12
Pratt	2022	1	31038	456	51553	171
Pratt	2022	2	33601	456	59498	171
Pratt	2022	3	34096	456	37328	171
Pratt	2022	4	31049	456	64154	171
Pratt	2022	5	31400	456	63744	171
Pratt	2022	6	31411	456	65566	171
Pratt	2022	7	32542	456	64635	171
Pratt	2022	8	33350	456	58236	171
Pratt	2022	9	31658	456	61917	171
Pratt	2022	10	32724	456	59266	171
Pratt	2022	11	30265	456	57456	171
Pratt	2022	12	27225	456	55864	171
Rawlins	2022	1	24156	227
Rawlins	2022	2	26112	227
Rawlins	2022	3	31124	227
Rawlins	2022	4	30930	227
Rawlins	2022	5	31694	227
Rawlins	2022	6	32294	227
Rawlins	2022	7	32172	227
Rawlins	2022	8	35005	227
Rawlins	2022	9	33414	227
Rawlins	2022	10	33046	227
Rawlins	2022	11	30809	227
Rawlins	2022	12	29361	227
Reno	2022	1	32845	352	44262	121
Reno	2022	2	27658	352	41865	121
Reno	2022	3	39623	352	44655	121
Reno	2022	4	34048	352	54405	121
Reno	2022	5	31694	352	53617	121
Reno	2022	6	32612	352	54416	121
Reno	2022	7	32870	352	47790	121
Reno	2022	8	33606	352	50968	121
Reno	2022	9	29503	352	57470	121
Reno	2022	10	34608	352	57725	121
Reno	2022	11	30384	352	50571	121
Reno	2022	12	30904	352	48191	121
Rice	2022	1	38249	860	9847	36
Rice	2022	2	39249	860	10512	36
Rice	2022	3	47127	860	9349	36
Rice	2022	4	43043	860	11982	36
Rice	2022	5	40672	860	11224	36
Rice	2022	6	43691	860	11316	36
Rice	2022	7	42761	860	10234	36
Rice	2022	8	43967	860	9193	36
Rice	2022	9	41390	860	11867	36
Rice	2022	10	44538	860	12119	36
Rice	2022	11	42645	860	12544	36
Rice	2022	12	42523	860	11383	36
Riley	2022	1	875	29
Riley	2022	2	1171	29
Riley	2022	3	1348	29
Riley	2022	4	1327	29
Riley	2022	5	827	29
Riley	2022	6	991	29
Riley	2022	7	1478	29
Riley	2022	8	1077	29
Riley	2022	9	1198	29
Riley	2022	10	1294	29
Riley	2022	11	816	29
Riley	2022	12	832	29
Rooks	2022	1	104620	1561
Rooks	2022	2	104281	1561
Rooks	2022	3	111548	1561
Rooks	2022	4	108415	1561
Rooks	2022	5	107538	1561
Rooks	2022	6	123419	1561
Rooks	2022	7	111442	1561
Rooks	2022	8	117364	1561
Rooks	2022	9	104393	1561
Rooks	2022	10	111710	1561
Rooks	2022	11	108921	1561
Rooks	2022	12	109817	1561
Rush	2022	1	12709	183	25153	64
Rush	2022	2	10588	183	23310	64
Rush	2022	3	13439	183	24455	64
Rush	2022	4	10887	183	27170	64
Rush	2022	5	11640	183	24695	64
Rush	2022	6	12700	183	21757	64
Rush	2022	7	10716	183	24254	64
Rush	2022	8	13182	183	24098	64
Rush	2022	9	11568	183	22892	64
Rush	2022	10	11433	183	24886	64
Rush	2022	11	10026	183	22164	64
Rush	2022	12	10105	183	22727	64
Russell	2022	1	98883	1841
Russell	2022	2	103208	1841
Russell	2022	3	119738	1841
Russell	2022	4	110291	1841
Russell	2022	5	110934	1841
Russell	2022	6	117045	1841
Russell	2022	7	107023	1841
Russell	2022	8	121825	1841
Russell	2022	9	114673	1841
Russell	2022	10	109149	1841
Russell	2022	11	112334	1841
Russell	2022	12	109357	1841
Saline	2022	1	3893	99
Saline	2022	2	4301	99
Saline	2022	3	4203	99
Saline	2022	4	3809	99
Saline	2022	5	4602	99
Saline	2022	6	4529	99
Saline	2022	7	3692	99
Saline	2022	8	4755	99
Saline	2022	9	3983	99
Saline	2022	10	5446	99
Saline	2022	11	4189	99
Saline	2022	12	4997	99
Scott	2022	1	37592	352	14923	9
Scott	2022	2	39903	352	12411	9
Scott	2022	3	45119	352	15723	9
Scott	2022	4	42538	352	14621	9
Scott	2022	5	43575	352	16542	9
Scott	2022	6	46726	352	16282	9
Scott	2022	7	42519	352	17441	9
Scott	2022	8	49004	352	17485	9
Scott	2022	9	42834	352	8754	9
Scott	2022	10	41824	352	16635	9
Scott	2022	11	41245	352	15179	9
Scott	2022	12	41906	352	14741	9
Sedgwick	2022	1	8957	110	762	3
Sedgwick	2022	2	7972	110	339	3
Sedgwick	2022	3	8151	110	947	3
Sedgwick	2022	4	7915	110	896	3
Sedgwick	2022	5	7004	110	891	3
Sedgwick	2022	6	7442	110	938	3
Sedgwick	2022	7	7304	110	602	3
Sedgwick	2022	8	7793	110	378	3
Sedgwick	2022	9	8046	110	586	3
Sedgwick	2022	10	7053	110	1100	3
Sedgwick	2022	11	6277	110	913	3
Sedgwick	2022	12	7261	110	669	3
Seward	2022	1	21507	188	557951	880
Seward	2022	2	22451	188	500892	880
Seward	2022	3	22014	188	557520	880
Seward	2022	4	24172	188	542785	880
Seward	2022	5	23613	188	559464	880
Seward	2022	6	23301	188	530063	880
Seward	2022	7	18857	188	548690	880
Seward	2022	8	24576	188	537665	880
Seward	2022	9	19268	188	496379	880
Seward	2022	10	21472	188	559622	880
Seward	2022	11	22303	188	519629	880
Seward	2022	12	20368	188	498476	880
Sheridan	2022	1	13621	139
Sheridan	2022	2	13138	139
Sheridan	2022	3	13628	139
Sheridan	2022	4	14317	139
Sheridan	2022	5	14368	139
Sheridan	2022	6	16407	139
Sheridan	2022	7	16748	139
Sheridan	2022	8	16527	139
Sheridan	2022	9	15701	139
Sheridan	2022	10	13854	139
Sheridan	2022	11	14355	139
Sheridan	2022	12	14151	139
Sherman	2022	1	1729	10	56710	236
Sherman	2022	2	1269	10	50590	236
Sherman	2022	3	1795	10	61567	236
Sherman	2022	4	1762	10	56601	236
Sherman	2022	5	1609	10	57733	236
Sherman	2022	6	1289	10	53456	236
Sherman	2022	7	1267	10	58736	236
Sherman	2022	8	1574	10	58898	236
Sherman	2022	9	1431	10	55056	236
Sherman	2022	10	1756	10	57864	236
Sherman	2022	11	1460	10	56132	236
Sherman	2022	12	1275	10	53537	236
Stafford	2022	1	71763	1141	15481	56
Stafford	2022	2	69134	1141	13889	56
Stafford	2022	3	85148	1141	16465	56
Stafford	2022	4	79085	1141	17250	56
Stafford	2022	5	79492	1141	18518	56
Stafford	2022	6	82415	1141	17975	56
Stafford	2022	7	82483	1141	17437	56
Stafford	2022	8	79783	1141	18623	56
Stafford	2022	9	77650	1141	15610	56
Stafford	2022	10	78189	1141	18431	56
Stafford	2022	11	71854	1141	17087	56
Stafford	2022	12	73838	1141	15183	56
Stanton	2022	1	8412	80	666115	801
Stanton	2022	2	8286	80	594175	801
Stanton	2022	3	9410	80	647926	801
Stanton	2022	4	10885	80	628983	801
Stanton	2022	5	7954	80	657827	801
Stanton	2022	6	8643	80	633385	801
Stanton	2022	7	8053	80	644902	801
Stanton	2022	8	8625	80	650854	801
Stanton	2022	9	8587	80	597259	801
Stanton	2022	10	8345	80	678186	801
Stanton	2022	11	7238	80	622049	801
Stanton	2022	12	8821	80	634787	801
Stevens	2022	1	18982	119	1846279	2058
Stevens	2022	2	16455	119	1569956	2058
Stevens	2022	3	19231	119	1838193	2058
Stevens	2022	4	16489	119	1841115	2058
Stevens	2022	5	18814	119	1899365	2058
Stevens	2022	6	18113	119	1821867	2058
Stevens	2022	7	17430	119	1879304	2058
Stevens	2022	8	22016	119	1859761	2058
Stevens	2022	9	17282	119	1698837	2058
Stevens	2022	10	20205	119	1906551	2058
Stevens	2022	11	20757	119	1773034	2058
Stevens	2022	12	17723	119	1677608	2058
Sumner	2022	1	26165	463	57218	43
Sumner	2022	2	23523	463	55600	43
Sumner	2022	3	31833	463	65500	43
Sumner	2022	4	31558	463	60254	43
Sumner	2022	5	26583	463	63453	43
Sumner	2022	6	33219	463	69643	43
Sumner	2022	7	30678	463	75680	43
Sumner	2022	8	36651	463	73625	43
Sumner	2022	9	28722	463	61839	43
Sumner	2022	10	31388	463	69206	43
Sumner	2022	11	29298	463	69527	43
Sumner	2022	12	28890	463	60266	43
Thomas	2022	1	20693	167
Thomas	2022	2	22217	167
Thomas	2022	3	24370	167
Thomas	2022	4	24345	167
Thomas	2022	5	23085	167
Thomas	2022	6	24021	167
Thomas	2022	7	23660	167
Thomas	2022	8	23577	167
Thomas	2022	9	20994	167
Thomas	2022	10	21241	167
Thomas	2022	11	19128	167
Thomas	2022	12	19418	167
Trego	2022	1	44310	665
Trego	2022	2	40185	665
Trego	2022	3	47993	665
Trego	2022	4	45918	665
Trego	2022	5	47731	665
Trego	2022	6	44997	665
Trego	2022	7	44723	665
Trego	2022	8	50350	665
Trego	2022	9	42250	665
Trego	2022	10	43807	665
Trego	2022	11	46894	665
Trego	2022	12	42973	665
Wabaunsee	2022	1	1255	27
Wabaunsee	2022	2	1722	27
Wabaunsee	2022	3	1918	27
Wabaunsee	2022	4	2964	27
Wabaunsee	2022	5	2016	27
Wabaunsee	2022	6	2374	27
Wabaunsee	2022	7	2471	27
Wabaunsee	2022	8	3120	27
Wabaunsee	2022	9	2110	27
Wabaunsee	2022	10	2706	27
Wabaunsee	2022	11	2286	27
Wabaunsee	2022	12	1987	27
Wallace	2022	1	4286	35
Wallace	2022	2	4031	35
Wallace	2022	3	4390	35
Wallace	2022	4	5374	35
Wallace	2022	5	4514	35
Wallace	2022	6	4624	35
Wallace	2022	7	3972	35
Wallace	2022	8	3594	35
Wallace	2022	9	3629	35
Wallace	2022	10	5542	35
Wallace	2022	11	4632	35
Wallace	2022	12	4781	35
Wichita	2022	1	9235	69	1184	2
Wichita	2022	2	10393	69	815	2
Wichita	2022	3	12235	69	1161	2
Wichita	2022	4	12012	69	1131	2
Wichita	2022	5	11394	69	1194	2
Wichita	2022	6	11306	69	1165	2
Wichita	2022	7	9960	69	1142	2
Wichita	2022	8	10479	69	1172	2
Wichita	2022	9	10198	69	1025	2
Wichita	2022	10	10347	69	805	2
Wichita	2022	11	10063	69	780	2
Wichita	2022	12	9081	69	938	2
Wilson	2022	1	7348	1031	283387	1256
Wilson	2022	2	6757	1031	255147	1256
Wilson	2022	3	8373	1031	283507	1256
Wilson	2022	4	7194	1031	277831	1256
Wilson	2022	5	7546	1031	286381	1256
Wilson	2022	6	8032	1031	273866	1256
Wilson	2022	7	7744	1031	281889	1256
Wilson	2022	8	7327	1031	285705	1256
Wilson	2022	9	7267	1031	278784	1256
Wilson	2022	10	6997	1031	286320	1256
Wilson	2022	11	7209	1031	271563	1256
Wilson	2022	12	6741	1031	256952	1256
Woodson	2022	1	35393	3812	56	1
Woodson	2022	2	29142	3812	48	1
Woodson	2022	3	37176	3812	64	1
Woodson	2022	4	32324	3812	93	1
Woodson	2022	5	31785	3812	77	1
Woodson	2022	6	32358	3812	70	1
Woodson	2022	7	33045	3812	69	1
Woodson	2022	8	35148	3812	65	1
Woodson	2022	9	31403	3812	62	1
Woodson	2022	10	31627	3812	59	1
Woodson	2022	11	30602	3812	57	1
Woodson	2022	12	29157	3812	54	1
Wyandotte	2022	1
Wyandotte	2022	2
Wyandotte	2022	3
Wyandotte	2022	4
Wyandotte	2022	5
Wyandotte	2022	6
Wyandotte	2022	7
Wyandotte	2022	8
Wyandotte	2022	9
Wyandotte	2022	10
Wyandotte	2022	11
Wyandotte	2022	12
State Total	2022	1	2200502	49249	12547514	19712
State Total	2022	2	2131922	49299	11183620	19712
State Total	2022	3	2476096	49304	12536493	19685
State Total	2022	4	2360528	49303	12417374	19685
State Total	2022	5	2384261	49294	12900935	19685
State Total	2022	6	2454623	49309	12374762	19684
State Total	2022	7	2352431	49310	12737685	19684
State Total	2022	8	2517219	49300	12888706	19684
State Total	2022	9	2286869	49305	11928294	19684
State Total	2022	10	2355904	49300	13078085	19684
State Total	2022	11	2274620	49279	12287848	19684
State Total	2022	12	2216574	49294	11844290	19684

## Sheet: Table 2 Michigan wells
Michigan oil and gas well information and location. Accessed on 09/24/2023 at https://www.egle.state.mi.us/dataminer/.
Due to space constraints, Table 2 (available upon request) has been omitted from the main manuscript; please email zhang99@stanford.edu or visit original open-access website for access to this extended data.

## Sheet: Table 3 Michigan production
Michigan oil and gas production data. Accessed on 09/24/2023 at https://www.egle.state.mi.us/dataminer/.
Due to space constraints, Table 3 (available upon request) has been omitted from the main manuscript; please email zhang99@stanford.edu or visit original open-access website for access to this extended data.

## Sheet: Table 4 Global flare
Country	ISO Code	ID 2022	Latitude	Longitude	BCM 2022	Avg. temp., K	Ellipticity	Detection frequency 2022	Clear Obs.	Type
Iraq	IRQ	7290	31.0265	47.2837	1.18692	1655.99	2.49523	0.951613	310	upstream oil
Venezuela	VEN	4190	9.65305	-63.6232	1.07234	1807.41	1.87359	1	90	upstream oil
Venezuela	VEN	4216	9.6478	-63.5631	0.969635	1778.64	1.49301	1	85	upstream oil
Russian Federation	RUS	10045	60.4259	96.5111	0.935603	1726.67	1.74542	0.990476	105	upstream oil
Venezuela	VEN	4146	9.62078	-63.7246	0.884917	1847.46	1.40421	1	95	upstream oil
Russian Federation	RUS	10270	61.3463	112.807	0.804296	1734.36	1.49475	1	111	upstream oil
Iran	IRN	7470	31.0034	48.1398	0.800674	1666.01	1.45996	1	311	upstream oil
Iran	IRN	7719	28.4942	49.7146	0.69261	1660.64	1.87132	1	297	upstream oil
Russian Federation	RUS	10137	58.0355	106.546	0.602958	1743.97	1.90256	1	127	upstream oil
Mexico	MEX	3674	17.8423	-93.119	0.535237	1629.65	1.31911	0.967213	122	upstream oil
Russian Federation	RUS	10116	57.8745	105.887	0.521036	1798.07	1.48853	0.992308	130	upstream oil
Russian Federation	RUS	10157	57.9844	106.805	0.513704	1751.59	2.04837	0.989474	95	upstream oil
Venezuela	VEN	4231	9.65283	-63.5352	0.501387	1843.78	2.86104	0.988506	87	upstream oil
Iraq	IRQ	7344	31.6563	47.5152	0.49839	1737.86	1.45937	1	304	upstream oil
Iran	IRN	7999	27.7191	52.1784	0.47792	1729.76	1.97098	1	267	upstream oil
Iran	IRN	8081	25.5325	53.1489	0.47578	1670.32	1.70403	1	304	upstream oil
Russian Federation	RUS	10195	58.448	107.601	0.462603	1673.27	2.12036	0.969388	98	upstream oil
Iraq	IRQ	7308	30.8824	47.333	0.449641	1730.96	1.33609	0.990415	313	upstream oil
Iraq	IRQ	7368	30.5259	47.6113	0.449057	1755.14	1.27072	0.99308	289	upstream oil
Iran	IRN	8016	27.6843	52.249	0.441446	1736.85	2.25117	1	268	upstream oil
Iraq	IRQ	7254	31.769	46.0644	0.431339	1862.64	1.32316	0.961877	341	upstream oil
Iran	IRN	8053	27.5017	52.6433	0.430887	1744.43	3.21384	1	260	upstream oil
Russian Federation	RUS	10084	60.8435	97.3532	0.428172	1743.99	1.82933	0.977099	131	upstream oil
Mozambique	MOZ	8370	-11.2144	41.1347	0.422381	1692.55	2.05636	0.516667	180	upstream oil
Russian Federation	RUS	8773	66.9542	75.5301	0.413792	1744.13	1.98417	0.979592	98	upstream oil
Iraq	IRQ	7323	32.1177	47.4104	0.391425	1655.49	1.69635	0.996942	327	upstream oil
Iraq	IRQ	7330	31.6756	47.4363	0.390636	1631.5	1.38272	0.993421	304	upstream oil
Russian Federation	RUS	10227	60.147	109.097	0.384495	1711.35	1.96733	0.993103	145	upstream oil
Iran	IRN	7732	30.7204	49.8241	0.365148	1706.96	1.57373	0.99359	312	upstream oil
Mexico	MEX	3656	17.8982	-93.1851	0.361785	1627.06	1.32833	0.960938	128	upstream oil
Congo	COG	6114	-4.92323	11.3819	0.358371	1759.47	2.19219	1	38	upstream oil
Iraq	IRQ	7188	35.685	43.8768	0.355342	1704.94	1.17188	0.968153	314	upstream oil
Iraq	IRQ	7363	30.5303	47.5977	0.353539	1736.99	1.60184	0.989691	291	upstream oil
Russian Federation	RUS	8775	66.9535	75.5494	0.34744	1737.39	1.11097	0.96	100	upstream oil
Iraq	IRQ	7364	30.4766	47.6021	0.336121	1691.18	1.27117	0.989865	296	upstream oil
Mexico	MEX	3579	18.508	-96.1461	0.335384	1808.58	2.93065	0.966443	149	upstream oil
Iran	IRN	8050	27.513	52.6205	0.334633	1748.96	3.04267	1	267	upstream oil
Russian Federation	RUS	10021	60.4352	96.249	0.333347	1732.52	2.39753	0.954545	110	upstream oil
Libya	LBY	5591	28.9094	19.7734	0.333253	1583.73	1.60498	0.955145	379	upstream oil
Algeria	DZA	5360	31.663	6.05649	0.332437	1671.65	1.59996	1	352	upstream oil
Iran	IRN	7632	31.1347	49.32	0.330779	1691.36	1.913	0.996865	319	upstream oil
Iraq	IRQ	7305	30.6102	47.3271	0.317285	1608.06	1.38605	0.990099	303	upstream oil
Iraq	IRQ	7372	31.0819	47.627	0.314148	1623.65	1.42595	0.971875	320	upstream oil
Iran	IRN	7263	32.992	46.184	0.311488	1749.13	1.38474	0.990769	325	upstream oil
Iran	IRN	7712	30.9001	49.6763	0.310285	1737.71	1.76506	0.996785	311	upstream oil
Libya	LBY	5613	28.905	20.9546	0.310106	1588.33	1.10795	0.978667	375	upstream oil
Venezuela	VEN	4259	9.67953	-63.4754	0.300651	1826.38	3.78436	0.976562	128	upstream oil
Iraq	IRQ	7195	35.7247	44.0404	0.299952	1672.17	1.23058	0.983607	305	upstream oil
Mexico	MEX	3724	19.3948	-92.043	0.293013	1715.94	1.62807	1	146	upstream oil
Iran	IRN	7740	30.3904	49.8607	0.29075	1779.88	1.70274	0.971875	320	upstream oil
Mexico	MEX	3607	18.0929	-94.0469	0.289093	1639.36	0.617765	0.970803	137	upstream oil
Iraq	IRQ	7302	30.8264	47.3297	0.275528	1662.17	1.4036	0.990099	303	upstream oil
Iran	IRN	7383	32.3528	47.7066	0.272899	1671.41	1.93414	0.991045	335	upstream oil
Iraq	IRQ	7352	32.1071	47.5504	0.271674	1676.75	1.54881	0.993994	333	upstream oil
Venezuela	VEN	4188	9.56425	-63.63	0.267996	1774.79	0.506995	0.992188	128	upstream oil
Russian Federation	RUS	10210	59.6359	108.118	0.267116	1776.48	2.04443	0.965517	116	upstream oil
Iran	IRN	7280	32.4908	47.2103	0.266627	1780.53	1.66278	0.990769	325	upstream oil
Iraq	IRQ	7304	30.6866	47.3297	0.264449	1625.46	1.44323	0.987539	321	upstream oil
Venezuela	VEN	4264	9.73065	-63.4626	0.263682	1836.38	2.02198	0.99187	123	upstream oil
Russian Federation	RUS	9203	66.6635	80.4563	0.26304	1703.29	0.674751	0.975309	81	upstream oil
Iraq	IRQ	7299	30.4951	47.3168	0.262276	1650.22	1.64503	0.993769	321	upstream oil
Iran	IRN	7484	30.7517	48.2803	0.260252	1654.46	1.2833	1	321	upstream oil
Algeria	DZA	5502	28.736	9.78944	0.259666	1732.92	1.41452	0.991979	374	upstream oil
Iran	IRN	7409	31.0888	47.79	0.258447	1652.19	1.07475	0.996587	293	upstream oil
Iraq	IRQ	7367	30.4194	47.6083	0.254026	1755.82	1.39538	0.996732	306	upstream oil
Russian Federation	RUS	9269	68.4121	83.6229	0.253229	1746.96	1.6015	0.898305	177	upstream oil
Iran	IRN	7660	31.0416	49.3922	0.252068	1696.42	1.34193	0.987138	311	upstream oil
Venezuela	VEN	4284	8.68659	-63.1548	0.250587	1795.31	1.79846	0.984496	129	upstream oil
Iraq	IRQ	7445	30.9291	48.0212	0.249562	1712.87	1.28971	1	315	upstream oil
Congo	COG	6155	-4.86402	12.0251	0.249027	1770.27	3.75354	0.972973	37	upstream oil
Venezuela	VEN	4258	9.73604	-63.4742	0.247319	1816.63	4.4903	0.96748	123	upstream oil
Iraq	IRQ	7306	30.5634	47.3306	0.245325	1627.64	1.84566	0.996678	301	upstream oil
Iraq	IRQ	7298	30.568	47.3152	0.244243	1677.31	1.33229	0.983498	303	upstream oil
Iraq	IRQ	7387	30.2671	47.7169	0.243383	1702.63	1.30809	0.996743	307	upstream oil
Mexico	MEX	3717	19.2942	-92.1696	0.243018	1658.52	1.18923	1	150	upstream oil
Iran	IRN	7461	31.2719	48.1167	0.241126	1574.15	1.15312	0.993769	321	upstream oil
Iraq	IRQ	7152	36.7761	43.3248	0.241085	1792.83	1.76137	0.992908	282	upstream oil
Venezuela	VEN	4107	9.38686	-64.5464	0.240571	1676.55	1.28841	0.992537	134	upstream oil
Iraq	IRQ	7331	32.0597	47.4459	0.240436	1696.02	1.57584	0.990769	325	upstream oil
Iran	IRN	8013	27.6887	52.2344	0.238785	1749.96	2.28108	1	266	upstream oil
Iraq	IRQ	7329	31.7319	47.4327	0.237922	1807.62	2.32098	0.996825	315	upstream oil
Mexico	MEX	3700	17.8958	-92.4906	0.235196	1584.11	0.799088	0.940741	135	upstream oil
Iraq	IRQ	7448	30.9915	48.0227	0.23137	1737.48	1.25289	1	321	upstream oil
Iraq	IRQ	7390	30.3255	47.7246	0.228495	1662.03	1.23204	0.996774	310	upstream oil
Libya	LBY	5658	27.6444	22.5017	0.224566	1628.65	1.49887	0.997283	368	upstream oil
Iraq	IRQ	7303	30.764	47.3275	0.223325	1589.07	1.62618	0.996552	290	upstream oil
Venezuela	VEN	4282	9.97694	-63.1814	0.220494	1765.94	1.28668	0.947712	153	upstream oil
Libya	LBY	5644	27.987	22.3238	0.219015	1591.87	1.24223	0.994792	384	upstream oil
Iran	IRN	7891	30.2542	50.778	0.218353	1699.1	1.94465	0.996503	286	upstream oil
Libya	LBY	5575	29.0726	19.0621	0.216077	1718.45	1.46638	0.902703	370	upstream oil
Iraq	IRQ	7311	30.3579	47.3384	0.214769	1620.13	1.34744	0.972136	323	upstream oil
Russian Federation	RUS	9183	68.57	80.3184	0.212921	1712.37	1.6015	0.940789	152	upstream oil
Congo	COG	6160	-4.51223	12.0507	0.211847	1757.77	1.6015	0.964286	28	upstream oil
Iran	IRN	7267	33.6961	46.2284	0.211069	1706.49	2.26587	0.905363	317	upstream oil
Iraq	IRQ	7283	32.2564	47.2512	0.207754	1680.44	1.30482	1	334	upstream oil
Venezuela	VEN	4277	9.77552	-63.2683	0.207299	1862.33	1.52142	0.952381	147	upstream oil
Russian Federation	RUS	10135	58.0957	106.546	0.203911	1748.67	1.25168	0.974843	159	upstream oil
Iraq	IRQ	7193	35.6291	44.0092	0.203594	1754.15	1.21179	0.986532	297	upstream oil
Russian Federation	RUS	8503	60.7522	69.3493	0.203386	1624.59	1.22429	0.965986	147	upstream oil
Kazakhstan	KAZ	6923	48.2339	57.3518	0.201489	1776.65	1.86052	0.893333	225	upstream oil
Iran	IRN	7767	30.5627	50.015	0.201275	1768.3	1.49131	0.996805	313	upstream oil
Iran	IRN	7714	29.9429	49.6867	0.198426	1685.02	1.67483	0.996599	294	upstream oil
Ghana	GHA	4913	4.5891	-3.13945	0.196138	1655.92	1.84928	1	67	upstream oil
Mexico	MEX	3720	19.428	-92.0788	0.196012	1701.49	2.26355	1	147	upstream oil
Iran	IRN	7549	32.1608	49.0659	0.195522	1669.79	1.8219	0.990164	305	upstream oil
Iran	IRN	8047	27.5473	52.5801	0.193816	1754.07	3.83453	1	265	upstream oil
Ghana	GHA	4915	4.59684	-2.8918	0.193055	1738.44	1.70156	0.970149	67	upstream oil
Mexico	MEX	3716	18.6442	-92.1707	0.192255	1603.6	1.01549	0.974359	156	upstream oil
Russian Federation	RUS	6778	51.8465	53.8128	0.192039	1652.19	1.21402	0.937853	177	upstream oil
China	CHN	11393	20.8152	108.898	0.190745	1707.59	1.59793	1	79	upstream oil
Angola	AGO	6171	-7.84681	12.1121	0.188774	1648.13	2.03995	0.741935	62	upstream oil
Iraq	IRQ	7345	32.1782	47.5206	0.188288	1703.51	1.29941	0.990937	331	upstream oil
Russian Federation	RUS	8519	60.7647	70.1766	0.187917	1779.2	1.63365	0.95679	162	upstream oil
Nigeria	NGA	5772	5.70853	4.48132	0.187837	1671.56	1.78106	1	45	upstream oil
Russian Federation	RUS	8541	66.1989	70.9887	0.187424	1765.5	2.03004	0.913043	138	upstream oil
Algeria	DZA	5342	31.5893	5.95741	0.186568	1707.85	1.05723	0.983516	364	upstream oil
Algeria	DZA	5313	32.9474	3.22822	0.184927	1673.32	1.09588	0.979798	297	upstream oil
Algeria	DZA	5402	28.6009	7.25943	0.181791	1789.66	1.20249	0.997143	350	upstream oil
Iraq	IRQ	7201	35.487	44.1549	0.181603	1727.4	1.21293	0.980769	312	upstream oil
Iraq	IRQ	7277	30.5639	47.1037	0.181486	1715.01	1.64412	0.943114	334	upstream oil
Iraq	IRQ	7185	34.8951	43.8063	0.180741	1591.94	1.04846	0.978528	326	upstream oil
Algeria	DZA	5498	28.9167	9.74698	0.179579	1703.78	1.85564	0.989501	381	upstream oil
Iraq	IRQ	7324	30.1666	47.4148	0.179251	1615	1.33801	0.996875	320	upstream oil
Iran	IRN	8044	27.5641	52.5604	0.178971	1607.66	3.09448	1	270	upstream oil
Russian Federation	RUS	9118	58.156	78.8859	0.178488	1816.89	2.95405	0.963415	164	upstream oil
Iran	IRN	7834	30.4841	50.4846	0.177865	1681.75	1.66005	0.996774	310	upstream oil
Iraq	IRQ	7216	33.4885	44.3442	0.176896	1717.73	1.32619	0.997085	343	upstream oil
Venezuela	VEN	4199	9.65065	-63.6077	0.176656	1704.34	1.6015	0.989474	95	upstream oil
Russian Federation	RUS	6847	51.5905	55.4783	0.176191	1792.23	2.91895	0.921212	165	upstream oil
Russian Federation	RUS	9338	57.4648	78.4296	0.17569	1892.95	1.61332	0.955224	201	upstream oil
Iran	IRN	7824	30.1548	50.4224	0.174788	1681.53	2.03952	0.967638	309	upstream oil
Russian Federation	RUS	8489	59.8756	68.9867	0.174266	1873.13	1.85301	0.978723	94	upstream oil
Nigeria	NGA	5900	3.46557	5.56149	0.173086	1643.7	1.86446	0.877551	49	upstream oil
Venezuela	VEN	4115	9.23262	-64.3016	0.172908	1582.04	1.85033	0.936306	157	upstream oil
Russian Federation	RUS	8655	60.1134	73.5738	0.172634	1851.44	1.59993	0.978723	188	upstream oil
Iraq	IRQ	7190	35.6623	43.9655	0.172591	1769.84	1.16366	0.986755	302	upstream oil
Libya	LBY	5552	26.7562	12.4124	0.172364	1646.82	1.59631	0.923913	368	upstream oil
Iran	IRN	7885	30.3004	50.7332	0.172204	1650.84	1.73171	0.996552	290	upstream oil
Iran	IRN	7528	31.2119	48.954	0.17028	1669.94	1.50293	0.990712	323	upstream oil
Nigeria	NGA	5839	5.6598	6.51654	0.169649	1674.59	2.2511	1	52	upstream oil
Iran	IRN	7701	30.9881	49.5938	0.169363	1740.6	1.39725	0.984375	320	upstream oil
Libya	LBY	5655	27.6476	22.4817	0.168023	1652.22	1.20748	0.989218	371	upstream oil
Nigeria	NGA	5849	5.38637	6.65717	0.167127	1654.99	1.41822	0.971014	69	upstream gas
Iran	IRN	7804	30.3488	50.2901	0.166211	1670.44	2.17791	0.967638	309	upstream oil
Algeria	DZA	5329	30.8784	5.64249	0.165611	1704.8	1.9273	0.967033	364	upstream oil
Iraq	IRQ	7180	35.9824	43.7693	0.163452	1746.27	1.96038	0.986532	297	upstream oil
Nigeria	NGA	5990	4.14636	7.9721	0.16273	1654.88	1.01303	0.944444	18	upstream oil
Malaysia	MYS	11624	3.60557	112.411	0.162057	1671.01	2.07394	0.941176	17	upstream oil
Iraq	IRQ	7371	31.0628	47.6177	0.15999	1620.88	1.06981	0.959119	318	upstream oil
Iraq	IRQ	7314	30.5593	47.3461	0.158437	1666.11	1.9189	0.996689	302	upstream oil
Algeria	DZA	5422	28.6184	7.70841	0.158181	1699.76	1.2444	0.99723	361	upstream oil
Iraq	IRQ	7321	32.131	47.4091	0.157284	1647.58	1.3306	0.993865	326	upstream oil
Iraq	IRQ	7271	30.352	46.8381	0.154674	1735.16	1.50239	0.921922	333	upstream oil
Libya	LBY	5549	26.5788	12.211	0.154572	1646.83	1.48375	0.978022	364	upstream oil
Russian Federation	RUS	6696	51.5675	52.757	0.154337	1764.7	1.93883	0.913295	173	upstream oil
Venezuela	VEN	4289	8.7265	-62.9092	0.154194	1852.14	1.92474	0.969697	132	upstream oil
Nigeria	NGA	5982	4.30485	7.65993	0.154031	1638.11	1.5907	0.8	20	upstream gas
Iran	IRN	7865	30.3966	50.6111	0.153984	1728.75	1.8977	0.993377	302	upstream oil
Angola	AGO	6135	-7.65044	11.6805	0.152986	1640.63	1.52581	0.942029	69	upstream oil
Nigeria	NGA	5779	5.55956	5.07274	0.152769	1648.68	1.23575	1	41	upstream oil
Iran	IRN	7690	30.7083	49.5394	0.152317	1741.66	1.3873	0.987768	327	upstream oil
Iran	IRN	7871	30.0382	50.637	0.152216	1730.68	2.53813	0.993377	302	upstream oil
Iraq	IRQ	7449	30.8762	48.0239	0.152167	1768.35	1.29144	0.990566	318	upstream oil
Iran	IRN	7622	31.3212	49.282	0.147601	1720.21	1.40789	0.99361	313	upstream oil
Nigeria	NGA	5807	5.90074	5.58305	0.146838	1684.2	1.67349	0.961039	77	upstream oil
Algeria	DZA	5404	28.5602	7.46318	0.146539	1740.88	1.24906	0.997167	353	upstream oil
Russian Federation	RUS	8566	59.7612	71.7356	0.146216	1772.06	1.57364	0.969697	165	upstream oil
Iraq	IRQ	7313	30.3145	47.3486	0.143963	1660.15	1.1119	0.859813	321	upstream oil
Mexico	MEX	3610	18.2037	-94.0069	0.143936	1611.16	1.45335	0.96732	153	upstream oil
Malaysia	MYS	11417	5.42848	114.712	0.143809	1742.17	1.71585	1	12	upstream oil
Algeria	DZA	5418	28.5766	7.65519	0.142948	1710.35	1.11146	0.997222	360	upstream oil
Iraq	IRQ	7315	30.2794	47.3614	0.142024	1600.88	1.41345	0.996894	322	upstream oil
Turkmenistan	TKM	6703	40.1825	52.8392	0.141997	1734.09	2.09871	0.747573	309	upstream oil
Iraq	IRQ	7178	35.9988	43.762	0.141798	1811.7	1.4538	0.986486	296	upstream oil
Russian Federation	RUS	10194	58.4243	107.578	0.141703	1598.95	0.581952	1	108	upstream oil
Russian Federation	RUS	8908	64.6854	76.7297	0.140834	1680.75	1.07142	0.980392	102	upstream oil
Iraq	IRQ	7170	36.0184	43.6829	0.140757	1860.67	1.33053	0.967532	308	upstream oil
Russian Federation	RUS	9243	67.2805	83.0352	0.140133	1672.77	1.03934	0.87037	108	upstream oil
Iran	IRN	8082	25.5077	53.1499	0.139743	1697.94	1.89511	0.858521	311	upstream oil
Algeria	DZA	5388	29.6975	6.70839	0.137044	1699.37	1.92996	0.994832	387	upstream oil
Iraq	IRQ	7319	30.213	47.392	0.136925	1572.55	1.51953	1	324	upstream oil
Turkmenistan	TKM	8088	39.3985	53.1869	0.135497	1728.4	2.97513	0.928571	224	upstream oil
Russian Federation	RUS	8602	60.7759	72.445	0.134036	1863.65	2.62907	0.871921	203	upstream oil
Iran	IRN	7918	29.5096	51.2591	0.133861	1799.9	1.76628	0.990937	331	upstream oil
Libya	LBY	5651	27.5826	22.4034	0.133602	1546.24	1.1838	0.966146	384	upstream oil
Mexico	MEX	3627	17.9113	-93.5212	0.13359	1619.03	1.24442	0.94964	139	upstream oil
Iraq	IRQ	7388	30.2774	47.7187	0.133337	1773	1.20107	1	304	upstream oil
Algeria	DZA	5401	28.6842	7.19444	0.132499	1712.41	1.19378	0.975477	367	upstream oil
Iraq	IRQ	7377	30.7522	47.6652	0.131527	1682.47	1.7543	0.990506	316	upstream oil
Iran	IRN	8080	29.2564	53.122	0.130329	1769.32	1.72958	0.982405	341	upstream oil
Angola	AGO	6200	-7.06656	12.4103	0.130015	1697.58	2.03397	0.978261	46	upstream oil
Oman	OMN	8364	21.3034	57.7989	0.129885	1788.52	1.27472	0.997093	344	upstream oil
Algeria	DZA	5294	28.1165	0.306013	0.128928	1716.9	1.56711	0.905605	339	upstream oil
Venezuela	VEN	4233	9.70227	-63.5278	0.128607	1775	0.554257	0.984	125	upstream oil
Iraq	IRQ	7327	32.0953	47.4269	0.127596	1839.53	1.3783	0.987692	325	upstream oil
Russian Federation	RUS	9235	63.4459	80.9938	0.127258	1697.44	1.4207	0.957627	118	upstream oil
Libya	LBY	5601	28.056	19.9122	0.126706	1647.21	1.69921	0.859116	362	upstream oil
Russian Federation	RUS	9213	63.4325	80.5256	0.126632	1740.18	1.53038	0.946565	131	upstream oil
China	CHN	11860	39.4664	120.453	0.126043	1749.38	1.66223	0.99569	232	upstream oil
Iraq	IRQ	7251	31.3574	45.9646	0.125319	1728.95	1.57051	0.977273	352	upstream oil
China	CHN	11865	39.7996	120.613	0.124651	1775.01	1.74744	1	241	upstream oil
Iraq	IRQ	7156	36.907	43.3905	0.124532	1886.17	1.25378	0.992754	276	upstream oil
Iraq	IRQ	7293	31.1027	47.2956	0.124358	1872.6	1.28881	0.939873	316	upstream oil
Iraq	IRQ	7397	30.2743	47.7419	0.123575	1665.75	1.42141	0.993399	303	upstream oil
Iran	IRN	7279	32.5059	47.2066	0.123521	1722.9	2.02849	0.978395	324	upstream oil
Venezuela	VEN	4269	9.74232	-63.4307	0.123497	1882.94	2.02941	0.971223	139	upstream oil
Algeria	DZA	5387	32.5128	6.70977	0.123088	1671.51	1.0217	0.988539	349	upstream oil
Nigeria	NGA	5771	5.35888	4.34207	0.122676	1602.39	1.79276	0.881356	59	upstream oil
Iraq	IRQ	7233	33.1577	44.7866	0.122471	1720.49	1.31303	0.993958	331	upstream oil
Saudi Arabia	SAU	7662	25.6386	49.3925	0.122356	1625.48	1.68845	0.985119	336	upstream oil
Algeria	DZA	5483	27.9245	9.25072	0.121681	1588.07	0.952928	0.99455	367	upstream oil
Mexico	MEX	3694	18.8684	-92.6242	0.120004	1697.3	1.4955	0.993103	145	upstream oil
Russian Federation	RUS	9018	64.8494	77.2508	0.119707	1695.9	1.85344	0.827869	122	upstream gas
Russian Federation	RUS	9013	66.2048	77.2393	0.11882	1694.53	2.30361	0.910112	89	upstream oil
Iran	IRN	7566	31.3006	49.1199	0.118517	1726.54	1.34841	0.9875	320	upstream oil
Mexico	MEX	3708	19.5665	-92.2378	0.118334	1615.67	1.48223	0.914474	152	upstream oil
Algeria	DZA	5410	28.559	7.51664	0.118166	1643.13	1.06576	1	352	upstream oil
Iraq	IRQ	7157	36.8918	43.4301	0.118164	1919.33	1.59199	0.982456	285	upstream oil
India	IND	9886	19.3332	72.0204	0.117686	1682.42	2.24055	0.987124	233	upstream oil
Algeria	DZA	5501	28.0795	9.788	0.117383	1631	1.24413	0.983957	374	upstream oil
Libya	LBY	5587	29.2308	19.6969	0.116533	1467.32	1.13552	0.883289	377	upstream oil
Nigeria	NGA	5803	5.52431	5.46796	0.115551	1685.4	3.93104	0.683544	79	upstream oil
Russian Federation	RUS	8554	59.1995	71.3681	0.115135	1760.97	2.12553	0.942857	175	upstream oil
Libya	LBY	5556	33.9208	12.6787	0.115042	1694.45	1.638	1	280	upstream oil
Algeria	DZA	5386	29.6887	6.6989	0.114839	1717.16	2.05888	0.994764	382	upstream oil
Nigeria	NGA	5975	3.57563	7.39402	0.113745	1608	1.74847	1	19	upstream oil
Nigeria	NGA	5808	6.06237	5.58676	0.113625	1698.29	2.43799	0.962963	81	upstream oil
Cameroon	CMR	6011	4.42067	8.42367	0.113605	1782.61	2.07867	1	10	upstream oil
Algeria	DZA	5314	32.9339	3.23559	0.11301	1731.28	2.64294	0.979798	297	upstream oil
Egypt	EGY	5676	30.5344	26.0822	0.112822	1695.5	1.5573	0.96477	369	upstream oil
Iraq	IRQ	7310	30.4018	47.3351	0.112605	1664.4	1.0657	0.498489	331	upstream oil
Russian Federation	RUS	9091	62.3322	78.1666	0.111983	1624.79	1.6931	0.94958	119	upstream oil
Iraq	IRQ	7253	31.7686	46.048	0.111911	1919.69	0.824825	0.85044	341	upstream oil
Libya	LBY	5614	28.8931	20.9608	0.111719	1766.35	3.97976	0.956757	370	upstream oil
Russian Federation	RUS	9111	66.283	78.7474	0.111433	1675.2	1.97955	0.726316	95	upstream oil
Guyana	GUY	4651	8.01133	-56.9905	0.110911	1620.29	1.57398	0.813084	107	upstream oil
Algeria	DZA	5430	30.2532	8.08468	0.110896	1718.9	1.47728	0.90884	362	upstream oil
Russian Federation	RUS	10281	61.5405	113.166	0.110779	1781.91	1.87709	0.89759	166	upstream oil
Nigeria	NGA	5829	5.68505	6.35933	0.110621	1632.01	1.04366	0.904762	63	upstream oil
Nigeria	NGA	5812	6.01364	5.86557	0.110105	1617.79	1.5013	0.986486	74	upstream gas
Angola	AGO	6195	-6.85702	12.3936	0.109742	1682.03	4.05613	0.654545	55	upstream oil
Nigeria	NGA	5910	3.9359	5.87096	0.108899	1811.28	1.60878	1	38	upstream oil
Russian Federation	RUS	9016	65.9048	77.2441	0.108654	1654.96	1.94144	0.655914	93	upstream gas
Gabon	GAB	6052	-2.07471	9.16242	0.1085	1710.99	1.58601	1	39	upstream oil
Libya	LBY	5547	33.8599	12.058	0.10839	1821.28	1.75124	0.906574	289	upstream oil
Algeria	DZA	5324	31.7505	5.22741	0.108249	1733.56	1.18441	0.991667	360	upstream oil
Russian Federation	RUS	9100	64.9331	78.3484	0.108199	1792.27	2.06352	0.907895	76	upstream oil
Venezuela	VEN	4124	8.55679	-64.135	0.108185	1800.07	2.47568	0.825688	109	upstream oil
India	IND	9881	19.3702	71.3541	0.108097	1654.97	1.48673	0.995413	218	upstream oil
Iran	IRN	7728	30.7923	49.7893	0.107894	1722.4	1.32635	0.95679	324	upstream oil
India	IND	9880	19.3472	71.3058	0.107865	1696.03	1.47603	0.986547	223	upstream oil
Algeria	DZA	5359	31.7988	6.05956	0.107066	1731.24	1.76351	0.983193	357	upstream oil
Mexico	MEX	3647	18.0656	-93.3112	0.10699	1853.87	1.03048	0.913043	161	upstream oil
Russian Federation	RUS	6335	69.2652	57.2858	0.106904	1843.74	1.24423	0.952381	42	upstream oil
Iran	IRN	7778	30.2962	50.0894	0.106386	1721.12	1.74153	0.893082	318	upstream oil
Russian Federation	RUS	9234	63.4468	80.9771	0.106274	1715.85	1.40501	0.958678	121	upstream oil
Taiwan	TWN	11429	20.4054	115.406	0.106034	1807.3	1.51356	1	72	upstream oil
Oman	OMN	8180	23.1908	55.4602	0.105278	1774.68	1.56028	0.988473	347	upstream oil
Libya	LBY	5615	28.9117	20.9676	0.105135	1713.11	1.86442	0.981383	376	upstream oil
Algeria	DZA	5429	31.0552	8.03445	0.104632	1592.73	1.19498	0.965147	373	upstream oil
Argentina	ARG	4519	-38.3335	-69.056	0.103417	1649.27	1.66191	0.938144	291	upstream oil
Russian Federation	RUS	6701	51.6154	52.801	0.103384	1783.46	1.356	0.940476	168	upstream oil
Russian Federation	RUS	8440	61.753	66.9678	0.102721	1658.68	1.47882	0.926108	203	upstream oil
United States	USA	2344	32.1536	-101.931	0.102564	1779.15	2.58315	0.708464	319	upstream oil
Russian Federation	RUS	8439	61.7538	66.9532	0.102395	1656.26	1.44721	0.896907	194	upstream oil
Iraq	IRQ	7160	36.8689	43.4889	0.102387	1896.33	1.63553	0.981752	274	upstream oil
Egypt	EGY	5699	30.7698	27.1051	0.101821	1810.81	1.2045	0.973529	340	upstream oil
Libya	LBY	5623	28.8703	21.2218	0.101756	1724.08	1.27694	0.913386	381	upstream oil
Algeria	DZA	5433	31.0133	8.16554	0.101552	1599.34	1.70501	0.97561	369	upstream oil
Algeria	DZA	5383	30.8363	6.56032	0.100604	1681.32	1.17677	0.997126	348	upstream oil
Iran	IRN	7748	30.5728	49.9182	0.100445	1609.36	1.80282	0.830247	324	upstream oil
Libya	LBY	5652	27.8123	22.4332	0.100437	1600.45	1.15905	0.893401	394	upstream oil
Kazakhstan	KAZ	6932	48.3848	57.4246	0.0996408	1754.28	1.72269	0.894068	236	upstream oil
Russian Federation	RUS	8592	60.549	72.316	0.0995466	1776.59	1.97939	0.847716	197	upstream oil
Iran	IRN	7687	30.9791	49.5154	0.0993144	1717.68	1.15277	0.955836	317	upstream oil
Iran	IRN	7705	30.8919	49.6122	0.099091	1719.34	2.14234	0.847826	322	upstream oil
Mexico	MEX	3725	19.4391	-92.0362	0.098951	1691.8	1.69524	0.993711	159	upstream oil
Algeria	DZA	5499	28.6338	9.78623	0.0988048	1584.16	1.29843	0.968254	378	upstream oil
Venezuela	VEN	4110	9.37453	-64.5241	0.0987435	1741.17	1.27219	0.918519	135	upstream oil
Iran	IRN	7395	33.2522	47.7367	0.0986079	1690.19	1.62798	0.987342	316	upstream oil
Iran	IRN	7518	30.9225	48.8594	0.0984329	1723.08	1.16823	0.987768	327	upstream oil
Iran	IRN	7675	31.5147	49.4633	0.0978435	1768.78	1.41605	0.987842	329	upstream oil
Libya	LBY	5647	28.6949	22.3753	0.0973293	1710.65	1.03833	0.68984	374	upstream oil
Libya	LBY	5642	28.8341	22.1235	0.0970193	1689.99	1.79256	0.983562	365	upstream oil
Oman	OMN	8362	20.9998	57.6105	0.0968341	1842.02	1.30376	0.994203	345	upstream oil
Nigeria	NGA	5977	4.01708	7.49203	0.0966826	1590.46	2.05824	0.818182	22	upstream oil
Libya	LBY	5598	29.6525	19.8669	0.0948034	1743.38	1.38994	0.249357	389	upstream oil
Russian Federation	RUS	8537	60.9607	70.8635	0.0946807	1811.1	1.55603	0.94012	167	upstream oil
Libya	LBY	5553	26.7007	12.4526	0.0940546	1644.01	1.16219	0.737838	370	upstream oil
Qatar	QAT	8040	25.5944	52.5421	0.0939986	1664.55	1.99077	0.927445	317	upstream oil
Iran	IRN	7869	30.3948	50.6251	0.093848	1782.58	2.02101	0.938111	307	upstream oil
Algeria	DZA	5464	28.466	9.05683	0.0928165	1693.6	1.36872	0.966942	363	upstream oil
Turkmenistan	TKM	8057	39.4766	52.6905	0.0925063	1854.2	1.65485	1	229	upstream oil
Algeria	DZA	5479	27.7637	9.19332	0.0921259	1644.61	0.880482	0.997297	370	upstream oil
Russian Federation	RUS	10162	58.0527	106.864	0.0918913	1619.55	0.984827	0.395604	182	upstream oil
Iran	IRN	7883	30.2832	50.7149	0.09182	1804.36	1.55143	0.969697	297	upstream oil
Iraq	IRQ	7227	33.3242	44.5718	0.09166	1792.92	0.917612	0.996988	332	upstream oil
Algeria	DZA	5316	33.1263	3.31889	0.0916547	1716.39	1.64331	0.97411	309	upstream oil
Iraq	IRQ	7141	37.0784	42.5591	0.091604	1724.27	2.22134	0.982517	286	upstream oil
Russian Federation	RUS	8618	60.6205	72.6555	0.0915799	1758.58	1.41943	0.880597	201	upstream oil
Congo	COG	6131	-5.02656	11.6515	0.0915133	1708.52	1.67972	1	40	upstream oil
Democratic Republic of the Congo	COD	6175	-5.95357	12.1664	0.0913818	1697.86	1.86592	0.906977	43	upstream oil
Mexico	MEX	3705	19.6013	-92.293	0.0912632	1683.85	1.15311	0.948387	155	upstream oil
Russian Federation	RUS	10262	60.9187	112.129	0.0909647	1844.94	3.54525	0.929936	157	upstream oil
Qatar	QAT	8063	25.4273	52.7357	0.0907935	1685.71	1.60545	0.958599	314	upstream oil
Turkmenistan	TKM	8148	38.8532	54.234	0.0904976	1793.09	1.36741	0.882166	314	upstream oil
Mexico	MEX	3601	18.1309	-94.202	0.0904745	1846.27	1.43714	0.923077	169	upstream oil
Algeria	DZA	5394	31.3956	6.93571	0.0903656	1630.22	1.22857	0.978437	371	upstream oil
Russian Federation	RUS	6356	68.6144	57.9758	0.0903039	1792.53	1.32431	0.813333	75	upstream oil
Iran	IRN	8049	27.5324	52.5976	0.0902599	1790.74	3.36076	0.996377	276	upstream oil
Congo	COG	6138	-5.20395	11.7	0.0902206	1672.08	1.96461	0.980392	51	upstream oil
Russian Federation	RUS	9138	62.139	79.456	0.0900503	1725.59	1.71524	0.940397	151	upstream oil
Russian Federation	RUS	8617	60.6218	72.6402	0.0899658	1752.04	2.34773	0.806931	202	upstream oil
Russian Federation	RUS	9248	67.3319	83.13	0.0895178	1752.73	1.34936	0.79798	99	upstream oil
Algeria	DZA	5356	31.8484	6.0488	0.089249	1732.11	2.13917	0.991573	356	upstream oil
Turkmenistan	TKM	9618	37.0328	62.4178	0.0891929	1735.91	1.44438	0.937107	318	upstream oil
Syria	SYR	7087	36.1304	40.8144	0.0891923	1808.26	1.51884	0.979228	337	upstream oil
Russian Federation	RUS	9257	67.2733	83.2084	0.0889813	1708.1	1.6015	0.834711	121	upstream oil
Russian Federation	RUS	8659	62.8867	73.6136	0.0878242	1842.57	4.33596	0.917293	133	upstream oil
Saudi Arabia	SAU	7651	24.7953	49.3481	0.087543	1717.13	1.38584	0.994203	345	upstream oil
Russian Federation	RUS	8534	60.7474	70.819	0.0874517	1773.37	1.56391	0.959596	198	upstream oil
Nigeria	NGA	5814	5.43438	5.88435	0.0868805	1649.95	1.83376	0.892857	84	upstream gas
Iraq	IRQ	7219	35.4589	44.4206	0.0868218	1751.7	1.15076	0.970395	304	upstream oil
Iran	IRN	8077	27.4837	52.9698	0.0868056	1726.61	1.97212	1	327	upstream oil
Libya	LBY	5609	29.038	20.786	0.086717	1704.01	1.11022	0.955381	381	upstream oil
Russian Federation	RUS	9120	57.6706	78.9266	0.0861578	1802.14	1.82939	0.92268	194	upstream oil
Iran	IRN	7581	31.7633	49.1564	0.0861478	1842.6	1.3047	0.978462	325	upstream oil
Iraq	IRQ	7179	35.9702	43.7671	0.0861343	1669.99	2.75247	0.983108	296	upstream oil
Saudi Arabia	SAU	7708	28.369	49.6282	0.0860753	1648.49	1.29932	1	302	upstream oil
Iran	IRN	7351	32.5973	47.5443	0.0859291	1766.05	1.57389	0.778788	330	upstream oil
Oman	OMN	8179	23.1535	55.4484	0.0858484	1703.98	1.19906	0.985673	349	upstream oil
Algeria	DZA	5469	28.4489	9.13556	0.0858176	1627.18	0.992459	0.986301	365	upstream oil
Gabon	GAB	6079	-1.52362	9.9531	0.0858012	1670.5	1.93021	0.868421	38	upstream oil
Mexico	MEX	3699	17.8808	-92.4897	0.0857874	1672.41	1.55538	0.94697	132	upstream oil
Libya	LBY	5555	33.892	12.6054	0.0856999	1642.02	1.59535	1	287	upstream oil
Iran	IRN	7507	31.4072	48.648	0.085485	1743.07	1.53406	0.98773	326	upstream oil
India	IND	9882	19.5706	71.3601	0.0854645	1654.03	1.78775	0.995763	236	upstream oil
Congo	COG	6120	-4.52036	11.4183	0.0854472	1707.32	1.2897	1	35	upstream oil
Iraq	IRQ	7317	30.2007	47.3899	0.0854395	1612.44	1.23546	0.993808	323	upstream oil
Nigeria	NGA	5974	3.98963	7.29018	0.0850993	1587.97	0.876026	0.954545	22	upstream oil
Venezuela	VEN	4108	9.37681	-64.5362	0.0849937	1683.84	3.78257	0.985075	134	upstream oil
Congo	COG	6153	-4.91934	11.9353	0.0847847	1689	1.92644	0.941176	34	upstream oil
Angola	AGO	6188	-7.15809	12.3422	0.084745	1676.56	1.73395	0.928571	56	upstream oil
Nigeria	NGA	5846	5.2507	6.59984	0.0847101	1714.29	3.19975	0.985507	69	upstream oil
Iraq	IRQ	7285	31.0756	47.2598	0.0844932	1898.38	0.874121	0.934426	305	upstream oil
Algeria	DZA	5350	31.6331	5.98319	0.0842311	1724.72	1.22505	0.986339	366	upstream oil
Syria	SYR	7083	35.3026	40.4457	0.0841069	1833.97	1.39181	0.976812	345	upstream oil
Algeria	DZA	5364	31.7876	6.06549	0.083723	1708.21	1.49109	0.983287	359	upstream oil
Ecuador	ECU	4398	-0.153171	-76.6497	0.0834993	1789.82	1.91061	0.972973	37	upstream oil
United States	USA	2526	32.482	-101.645	0.0833311	1880.85	1.46386	0.919505	323	upstream oil
Iraq	IRQ	7168	36.0836	43.6408	0.0832618	1792.57	1.48573	0.977492	311	upstream oil
Iraq	IRQ	7204	35.3852	44.2179	0.0832598	1628.08	1.00805	0.978056	319	upstream oil
Algeria	DZA	5310	32.7452	3.18308	0.0831706	1690.88	1.93051	0.975155	322	upstream oil
Algeria	DZA	5381	29.2655	6.49168	0.0830608	1725.03	1.54172	0.938503	374	upstream oil
Venezuela	VEN	4141	9.62855	-63.7437	0.0830323	1956.39	2.1688	0.830645	124	upstream oil
Algeria	DZA	5320	32.4019	4.00604	0.0829936	1640.05	1.57987	0.976945	347	upstream oil
Russian Federation	RUS	8778	64.915	75.5515	0.0829903	1566.91	0.83962	0.910112	89	upstream oil
Algeria	DZA	5472	27.7495	9.15259	0.0829208	1640.91	0.94435	0.994505	364	upstream oil
Iraq	IRQ	7246	32.4889	45.6628	0.0824617	1729.69	1.55079	0.985673	349	upstream oil
China	CHN	11214	38.9957	119.003	0.0823319	1832.93	1.2498	1	235	upstream oil
Ghana	GHA	4916	4.47005	-2.55311	0.0822794	1669.24	2.44355	0.416667	84	upstream oil
Cameroon	CMR	6021	4.28201	8.56598	0.0817205	1670.33	2.33714	1	10	upstream oil
Russian Federation	RUS	10183	58.4205	107.384	0.0816803	1588.86	0.593967	0.95	100	upstream oil
Russian Federation	RUS	10120	57.7392	105.945	0.081611	1637.23	1.06826	0.631944	144	upstream oil
Algeria	DZA	5432	30.6628	8.10282	0.0815635	1625.02	1.49174	0.994475	362	upstream oil
Nigeria	NGA	5855	5.45934	6.69502	0.0814924	1670.39	2.68385	1	73	upstream oil
Yemen	YEM	8262	15.7165	48.7997	0.0808502	1787.02	1.4598	0.971429	315	upstream oil
Iraq	IRQ	7325	32.3497	47.4286	0.0807642	1705.59	1.16074	0.892216	334	upstream oil
Russian Federation	RUS	6801	52.2286	54.1227	0.0805696	1667.03	1.4871	0.923077	143	upstream oil
Kazakhstan	KAZ	6933	48.3274	57.4338	0.0804539	1738.79	1.9784	0.843049	223	upstream oil
Iran	IRN	8083	25.4973	53.1498	0.080367	1656.48	1.68308	0.938511	309	upstream oil
Russian Federation	RUS	10124	57.7244	106.035	0.0798631	1631.8	1.33591	0.910891	101	upstream oil
Russian Federation	RUS	8974	59.268	77.0347	0.0797556	1816.81	1.58263	0.952607	211	upstream oil
United States	USA	2339	32.2115	-101.937	0.0796573	1810.56	2.27077	0.512422	322	upstream oil
Venezuela	VEN	4059	10.0816	-71.7923	0.0796118	1643.6	1.76903	0.983051	59	upstream oil
Algeria	DZA	5414	28.6358	7.53682	0.0795358	1751.21	1.33814	0.98895	362	upstream oil
Nigeria	NGA	5976	4.45961	7.46846	0.0785947	1703.32	0.822985	0.944444	18	upstream oil
Azerbaijan	AZE	6634	40.0184	51.4526	0.0784679	1776.99	2.16344	0.376744	215	upstream oil
Syria	SYR	7065	34.9157	37.9461	0.0780256	1755.71	1.18496	0.949405	336	upstream oil
Russian Federation	RUS	10096	60.8713	97.4883	0.0779114	1883.36	2.11442	0.947644	191	upstream oil
Algeria	DZA	5455	28.7036	8.93915	0.0772806	1664.53	0.989849	0.994398	357	upstream oil
Russian Federation	RUS	8606	67.804	72.5094	0.0772768	1823.96	1.7159	0.644295	149	upstream oil
Russian Federation	RUS	9119	58.1561	78.9049	0.0767745	1831.96	2.51497	0.886905	168	upstream oil
Iran	IRN	8153	25.7022	54.3018	0.0765658	1658.87	1.71125	1	322	upstream oil
Russian Federation	RUS	10347	57.3544	107.03	0.0762077	1897.35	2.14846	0.877049	122	upstream oil
Nigeria	NGA	5943	3.14215	6.82321	0.0759829	1503.24	1.5874	1	40	upstream gas
Russian Federation	RUS	8501	60.1823	69.2965	0.0758349	1806.27	1.60661	0.961538	182	upstream oil
Congo	COG	6140	-5.21334	11.7077	0.0755006	1789	2.34975	0.979592	49	upstream oil
Russian Federation	RUS	6607	53.189	51.0022	0.0754208	1787.14	1.47013	0.920863	139	upstream oil
Iran	IRN	7754	30.9968	49.9498	0.0754008	1673.42	2.59403	0.960123	326	upstream oil
Russian Federation	RUS	6739	52.0775	53.3588	0.0752599	1700.5	1.51919	0.957746	142	upstream oil
Russian Federation	RUS	9160	68.5236	79.9541	0.0750453	1810.35	1.6015	0.732026	153	upstream oil
Gabon	GAB	6094	-3.86142	10.9484	0.0749502	1708.49	2.05781	1	18	upstream oil
Venezuela	VEN	4129	9.27364	-64.0434	0.0749024	1770.25	1.23292	0.578947	152	upstream oil
Russian Federation	RUS	8607	67.8039	72.5279	0.0746805	1809.88	1.93705	0.701389	144	upstream oil
Algeria	DZA	5325	32.072	5.35404	0.0744404	1735.36	1.71183	0.977401	354	upstream oil
Russian Federation	RUS	10129	58.2422	106.375	0.0743597	1683.12	1.6015	0.421569	204	upstream oil
Algeria	DZA	5330	30.9728	5.75835	0.0741422	1735.89	2.03607	0.978723	376	upstream oil
Saudi-Kuwaiti Neutral Zone	SAUKWTNZ	7431	28.5798	47.9181	0.0741284	1847.41	1.60634	0.97929	338	upstream oil
Vietnam	VNM	11380	10.1335	108.567	0.0737617	1764.16	1.49102	0.970149	67	upstream oil
India	IND	9884	19.2807	71.4325	0.0737438	1633.11	0.967895	1	223	upstream oil
Iran	IRN	7386	31.2843	47.7155	0.0735351	1700.14	1.31902	0.990566	318	upstream oil
Mexico	MEX	3728	19.3676	-92.0067	0.0734268	1715.12	1.5276	1	166	upstream oil
Angola	AGO	6098	-6.31881	11.0524	0.0734163	1660.08	1.63862	0.833333	84	upstream oil
Russian Federation	RUS	10198	58.4294	107.659	0.0730429	1694.27	0.99668	0.940594	101	upstream oil
Russian Federation	RUS	10167	57.9888	106.881	0.0723819	1660.37	0.428835	0.538462	143	upstream oil
Algeria	DZA	5467	28.5264	9.12223	0.0721872	1677.05	1.19857	0.884507	355	upstream oil
Chad	TCD	5880	10.2805	16.7329	0.0720138	1754.21	1.39671	1	145	upstream oil
Algeria	DZA	5309	32.5545	3.16775	0.0716231	1731.18	1.16842	0.963303	327	upstream oil
Algeria	DZA	5441	31.2314	8.56292	0.0715424	1686.45	2.00256	0.986842	380	upstream oil
Libya	LBY	5630	29.1906	21.4287	0.0714476	1620.78	1.07985	0.902375	379	upstream oil
Algeria	DZA	5319	32.2768	3.98714	0.0714261	1703.25	1.51974	0.977011	348	upstream oil
Venezuela	VEN	4273	9.85423	-63.3391	0.0713927	1810.62	2.5026	0.662651	166	upstream oil
Russian Federation	RUS	10171	58.1398	107.106	0.0712204	1614.65	1.15363	0.919708	137	upstream oil
Iraq	IRQ	7172	35.9526	43.7299	0.0707616	1810.57	1.30251	0.977918	317	upstream oil
Algeria	DZA	5326	30.7607	5.4534	0.0707525	1735.45	2.65772	0.769437	373	upstream oil
Russian Federation	RUS	8563	59.4138	71.6318	0.0707023	1612.54	1.81694	0.921429	140	upstream oil
Venezuela	VEN	4191	9.63925	-63.6269	0.0705878	1953.89	1.6015	0.969388	98	upstream oil
Nigeria	NGA	5851	5.63476	6.66956	0.0703415	1660.51	2.11667	0.965517	58	upstream oil
Iran	IRN	7838	30.4772	50.4985	0.0702884	1776.02	1.74227	0.983923	311	upstream oil
Mexico	MEX	3629	17.8698	-93.4978	0.0700885	1755.13	2.13603	0.817073	164	upstream oil
Russian Federation	RUS	8579	60.6695	72.0042	0.0698475	1796.84	1.8584	0.845771	201	upstream oil
Iraq	IRQ	7379	30.4553	47.6687	0.0697665	1797.09	1.30076	1	308	upstream oil
Yemen	YEM	8259	15.695	47.9569	0.0696702	1752.61	1.4067	0.87037	324	upstream oil
India	IND	10473	27.4689	95.4233	0.0696054	1803.9	1.52191	0.94	150	upstream oil
Russian Federation	RUS	8412	60.3301	64.7331	0.0695798	1845.65	1.79178	0.933702	181	upstream oil
Russian Federation	RUS	8753	60.0495	75.4551	0.0695584	1812.14	1.64244	0.984456	193	upstream oil
Russian Federation	RUS	8657	62.8874	73.6002	0.0693104	1835.23	1.62391	0.753425	146	upstream oil
Gabon	GAB	6075	-1.95798	9.87405	0.0693048	1687.04	3.01718	0.891892	37	upstream oil
Oman	OMN	8352	22.404	56.9896	0.0691747	1718.59	1.4217	1	333	upstream oil
Qatar	QAT	7898	25.3819	50.7996	0.0690042	1737.33	1.29239	0.892442	344	upstream oil
Gabon	GAB	6093	-3.91387	10.9371	0.0689787	1702.96	2.54982	1	26	upstream oil
Algeria	DZA	5417	28.6376	7.6149	0.0685959	1694.02	1.27285	0.859504	363	upstream oil
Iran	IRN	7828	30.5001	50.4468	0.0685677	1748.72	1.69082	0.968847	321	upstream oil
Nigeria	NGA	5792	5.92424	5.31631	0.0683887	1657.1	2.60561	0.864865	74	upstream oil
Russian Federation	RUS	10119	57.5594	105.921	0.0682366	1536.58	0.716203	0.728477	151	upstream oil
Turkmenistan	TKM	9615	37.1182	62.3637	0.0681741	1747.71	1.45878	0.935185	324	upstream oil
Iraq	IRQ	7373	30.3678	47.6377	0.0681395	1698.82	1.06602	0.996774	310	upstream oil
Oman	OMN	8285	18.6879	55.506	0.0681177	1771.27	1.31342	0.923077	325	upstream oil
Cameroon	CMR	6038	4.29105	8.74398	0.068067	1696.44	2.18868	1	12	upstream oil
Libya	LBY	5608	29.0554	20.7841	0.0680476	1703.63	1.47827	0.938462	390	upstream oil
Iran	IRN	7831	30.4649	50.4819	0.0680335	1839.44	2.03271	0.96463	311	upstream oil
Malaysia	MYS	11433	6.34678	115.658	0.0679017	1830.67	1.9152	0.90625	32	upstream oil
Iran	IRN	8052	27.4897	52.6412	0.0678641	1845.49	1.6015	1	271	upstream oil
Iraq	IRQ	7239	34.7568	45.152	0.0676704	1711.77	1.36377	0.944099	322	upstream oil
Qatar	QAT	7960	26.5825	51.9268	0.0674599	1687.88	1.28881	0.993243	296	upstream oil
Malaysia	MYS	11329	5.647	104.979	0.0674177	1684.32	2.25061	0.938776	49	upstream oil
Iran	IRN	7551	32.2998	49.0911	0.0673399	1790.6	1.59211	0.986928	306	upstream oil
Iran	IRN	7533	31.2403	48.9875	0.0673	1662.18	1.64155	0.984709	327	upstream oil
Malaysia	MYS	11413	5.87541	114.296	0.0668614	1692.06	1.86077	0.964286	28	upstream oil
Russian Federation	RUS	9099	64.9341	78.3326	0.0667455	1791.4	4.7371	0.72093	86	upstream oil
Yemen	YEM	8256	15.3423	46.8232	0.0666868	1731.9	1.32048	0.754839	310	upstream oil
Nigeria	NGA	5989	4.40369	7.82872	0.0666627	1744.21	1.93915	0.941176	17	upstream oil
Iran	IRN	8007	27.7092	52.1985	0.0665697	1736.45	1.6015	0.996283	269	upstream oil
Iran	IRN	7381	31.0277	47.7055	0.0663792	1619.61	0.895868	0.995951	247	upstream oil
Iran	IRN	8191	26.8514	55.8519	0.0663586	1697.27	1.76671	0.991045	335	upstream oil
Russian Federation	RUS	9136	62.14	79.4414	0.0662374	1742.84	2.45183	0.811321	159	upstream oil
Russian Federation	RUS	6700	51.6491	52.7947	0.0662371	1784.37	1.77162	0.878453	181	upstream oil
Libya	LBY	5570	27.5832	18.4694	0.0660349	1743.61	1.50943	0.948509	369	upstream oil
Syria	SYR	7130	36.9365	42.1305	0.0660211	1624.49	1.24384	0.979452	292	upstream oil
Oman	OMN	8272	18.0338	54.6419	0.0659929	1773.55	2.49674	0.911243	338	upstream oil
Iran	IRN	7750	31.0067	49.9356	0.0659465	1761.96	2.82245	0.873065	323	upstream oil
Algeria	DZA	5328	30.8967	5.58524	0.0659048	1696.43	1.07003	0.943089	369	upstream oil
Oman	OMN	8331	19.375	56.499	0.06583	1777.34	1.20891	0.985163	337	upstream oil
Iran	IRN	7806	30.3486	50.3031	0.0656955	1700.84	3.11077	0.980456	307	upstream oil
Brazil	BRA	4736	-25.6584	-42.8591	0.0656274	1698.89	1.6425	0.914062	128	upstream oil
Angola	AGO	6163	-5.35296	12.0778	0.0653894	1761.94	1.16969	1	45	upstream oil
Iran	IRN	7984	28.6824	52.0933	0.0653245	1725.8	1.21268	0.990769	325	upstream oil
Turkmenistan	TKM	8062	39.4649	52.7274	0.0651593	1782.63	1.86447	1	233	upstream oil
Iran	IRN	7691	29.2929	49.5489	0.0649415	1712.19	1.98925	0.958991	317	upstream oil
Algeria	DZA	5398	32.21	6.97166	0.0649394	1689.85	0.960465	0.41555	373	upstream oil
Malaysia	MYS	11645	4.74029	113.728	0.0648954	1636.78	1.60796	1	13	upstream oil
Papua New Guinea	PNG	12016	-6.45554	143.222	0.0646591	1880.36	4.48007	0.740741	27	upstream oil
Libya	LBY	5638	29.2155	21.6449	0.0646517	1656.59	1.23846	0.942466	365	upstream oil
Nigeria	NGA	5816	5.51597	5.93778	0.0646491	1627.25	1.21456	0.91358	81	upstream oil
Algeria	DZA	5471	28.734	9.1529	0.0644448	1695.12	1.02442	0.983425	362	upstream oil
Venezuela	VEN	4157	9.62442	-63.6969	0.064239	1813.81	1.6015	0.982456	114	upstream oil
India	IND	9883	19.4172	71.3903	0.0642335	1720.09	1.95319	0.843882	237	upstream oil
Russian Federation	RUS	10074	60.8717	97.2727	0.0641718	1776.04	1.0554	0.535135	185	upstream oil
Iran	IRN	7521	31.2793	48.8817	0.0640427	1768.49	1.76538	0.987952	332	upstream oil
Egypt	EGY	5727	29.851	27.9476	0.0638155	1661.62	1.24989	0.978667	375	upstream oil
Russian Federation	RUS	6646	52.0134	51.6894	0.0637665	1773.87	1.57134	0.888889	117	upstream oil
Iraq	IRQ	7163	36.8672	43.5193	0.0636655	1839.4	1.58176	0.971014	276	upstream oil
Russian Federation	RUS	10174	57.9786	107.155	0.0636088	1615	1.18591	0.676471	170	upstream oil
Libya	LBY	5568	28.9758	17.4658	0.0633717	1675.23	1.30281	0.944444	378	upstream oil
Algeria	DZA	5333	31.698	5.80951	0.063352	1718.4	1.43865	0.89779	362	upstream oil
Iran	IRN	7881	30.3108	50.6852	0.0631621	1825.91	1.45284	0.986622	299	upstream oil
United States	USA	2441	31.3641	-101.777	0.0628521	1762.84	3.00921	0.849231	325	upstream oil
Iran	IRN	7786	30.7124	50.1184	0.0626731	1670.3	1.86995	0.957929	309	upstream oil
Venezuela	VEN	4223	9.66969	-63.5483	0.0625829	1992.83	2.32931	0.960396	101	upstream oil
Kuwait	KWT	7398	29.8519	47.7444	0.0625785	1715.41	1.67844	0.972973	333	upstream oil
Russian Federation	RUS	8703	61.1589	74.5497	0.0625465	1893.68	3.2264	0.911565	147	upstream oil
Venezuela	VEN	4210	9.6385	-63.5831	0.0624153	1921.04	1.6015	1	104	upstream oil
Algeria	DZA	5463	28.7098	9.03586	0.061698	1657.85	1.07795	0.980501	359	upstream oil
Iraq	IRQ	7320	32.3687	47.4062	0.0615515	1664.88	1.40715	0.985251	339	upstream oil
Libya	LBY	5543	26.4329	11.8504	0.0610804	1702.55	1.32632	0.839142	373	upstream oil
Libya	LBY	5633	28.7111	21.4538	0.0609594	1665.08	1.27474	0.959677	372	upstream oil
Iran	IRN	7553	32.0644	49.0977	0.0609348	1674.15	1.19212	0.589506	324	upstream oil
Malaysia	MYS	11619	3.76315	112.065	0.0607645	1652.7	4.19756	0.882353	17	upstream oil
Iran	IRN	7416	31.3536	47.857	0.0607587	1748.76	1.23689	0.978395	324	upstream oil
Iran	IRN	7243	34.0066	45.4941	0.0605444	1764.37	1.57009	0.97076	342	upstream oil
Oman	OMN	8194	22.8782	55.926	0.0604399	1759.76	1.60946	0.972973	333	upstream oil
Nigeria	NGA	5897	4.55478	4.61596	0.0603917	1660.93	3.68131	0.323944	71	upstream oil
Algeria	DZA	5503	28.1903	9.8048	0.0602194	1736.82	1.18873	0.947368	380	upstream oil
Russian Federation	RUS	9167	67.8184	80.1049	0.0601998	1653.88	1.6015	0.796875	192	upstream oil
Algeria	DZA	5399	32.3559	6.97732	0.0600216	1682.1	1.18862	0.260054	373	upstream oil
Argentina	ARG	4547	-38.3607	-68.7431	0.0599262	1777.9	2.86702	0.851974	304	upstream oil
Russian Federation	RUS	10239	59.7885	110.878	0.0598569	1817.46	3.06079	0.791045	134	upstream oil
Philippines	PHL	11441	11.9765	119.312	0.059815	1864	1.64843	1	69	upstream oil
Yemen	YEM	8241	15.579	45.8028	0.0596723	1716.95	1.72107	0.962382	319	upstream oil
Angola	AGO	6190	-7.12906	12.3451	0.059667	1681	1.73694	0.959184	49	upstream oil
Egypt	EGY	5700	30.7601	27.1037	0.0595329	1771.46	1.35915	0.705015	339	upstream oil
Malaysia	MYS	11631	3.63147	112.709	0.059188	1759.97	2.63548	0.894737	19	upstream oil
Kazakhstan	KAZ	6938	47.8799	57.4619	0.0591498	1753.19	1.95705	0.874046	262	upstream oil
Russian Federation	RUS	6297	67.1792	56.6327	0.0590262	1903.73	1.83022	0.752212	113	upstream oil
Congo	COG	6161	-4.878	12.0459	0.0588005	1819.84	2.67937	0.954545	44	upstream oil
Malaysia	MYS	11321	5.58583	104.475	0.0586288	1805.86	1.91889	0.96	50	upstream oil
Cameroon	CMR	6009	4.27482	8.41743	0.0583699	1639.63	1.47609	1	13	upstream oil
United States	USA	2642	32.4352	-101.379	0.0583655	1837.2	1.5583	0.846395	319	upstream oil
Mexico	MEX	3624	17.9225	-93.7597	0.0583133	1826.28	1.7575	0.852761	163	upstream oil
Saudi Arabia	SAU	8136	22.6095	54.0589	0.0582223	1819.72	1.43261	0.991098	337	upstream oil
Nigeria	NGA	5912	4.33843	5.92548	0.0581897	1596.34	1.849	0.891892	37	upstream oil
Russian Federation	RUS	6550	44.9142	48.9597	0.0580265	1822.46	1.54394	0.97549	204	upstream oil
Congo	COG	6121	-5.37883	11.4433	0.0578832	1704.95	1.83366	1	57	upstream oil
Angola	AGO	6143	-5.66001	11.8095	0.0578777	1609.8	1.70573	0.979592	49	upstream oil
United Arab Emirates	ARE	8089	25.1894	53.2061	0.0578427	1681.05	1.89545	1	302	upstream oil
Mexico	MEX	3600	18.3131	-94.2634	0.0578081	1752.17	1.4657	0.974138	116	upstream oil
Angola	AGO	6105	-6.32081	11.2795	0.0576886	1657.12	1.60532	0.950617	81	upstream oil
India	IND	9879	19.5277	71.3004	0.0576405	1688.61	1.55166	1	233	upstream oil
Nigeria	NGA	5813	5.44832	5.88001	0.0576358	1769.58	1.18769	0.988506	87	upstream gas
Iraq	IRQ	7151	36.7311	43.2812	0.0575812	1817.18	1.68217	0.9699	299	upstream oil
Nigeria	NGA	5837	5.09978	6.50689	0.0575557	1774.01	2.5413	0.828125	64	upstream oil
Syria	SYR	7082	35.3805	40.3048	0.0574808	1810.26	1.41558	0.950581	344	upstream oil
Russian Federation	RUS	6514	43.4341	45.4508	0.0574109	1717.16	1.58341	0.9	170	upstream oil
Mexico	MEX	3704	19.3364	-92.4004	0.0573434	1794.36	1.26399	0.987654	162	upstream oil
Oman	OMN	8277	18.1721	55.2539	0.0572865	1786.94	1.12099	0.975155	322	upstream oil
Nigeria	NGA	5923	3.94042	6.39727	0.0571045	1640.95	1.51737	1	39	upstream oil
Egypt	EGY	5734	29.6548	28.3584	0.0570998	1639.31	0.953677	0.770889	371	upstream oil
Nigeria	NGA	5777	5.95114	5.05073	0.0570751	1623.58	2.19917	0.4125	80	upstream oil
Russian Federation	RUS	6799	51.975	54.1158	0.0569566	1907.75	1.62729	0.822581	186	upstream oil
Algeria	DZA	5341	31.4643	5.9389	0.0569102	1807.03	1.53465	0.704188	382	upstream oil
Russian Federation	RUS	8642	60.9134	73.1751	0.0568356	1867.91	1.68819	0.932292	192	upstream oil
Nigeria	NGA	5827	5.56838	6.30511	0.0566566	1659.3	0.870003	0.90411	73	upstream oil
Nigeria	NGA	5979	4.13561	7.51603	0.0564649	1555.44	4.19308	1	25	upstream oil
Yemen	YEM	8255	15.3774	46.8223	0.0564217	1742.89	1.44229	0.810897	312	upstream oil
Mexico	MEX	3706	19.2415	-92.2536	0.0562709	1715.47	1.23379	0.9875	160	upstream oil
Iran	IRN	7736	30.9362	49.8441	0.0560904	1798.5	3.6771	0.96875	320	upstream oil
Russian Federation	RUS	10123	57.6539	106.036	0.0560716	1686.06	1.55376	0.908333	120	upstream oil
Vietnam	VNM	11373	10.3797	108.361	0.0559486	1688.63	1.79967	0.985075	67	upstream oil
United States	USA	2649	32.4925	-101.352	0.0559451	1864.39	2.33837	0.81761	318	upstream oil
Nigeria	NGA	5911	4.55598	5.92144	0.0559263	1671.96	2.60136	0.775	80	upstream oil
Russian Federation	RUS	10287	62.4449	113.662	0.0558159	1735.01	1.39764	0.887805	205	upstream oil
Russian Federation	RUS	6644	52.5575	51.67	0.0557299	1835.19	1.87129	0.863636	154	upstream oil
Ecuador	ECU	4411	0.022662	-76.2785	0.0556806	1817.4	2.32325	0.911765	34	upstream oil
Egypt	EGY	5708	30.3698	27.2314	0.0555526	1663.33	1.28796	0.966942	363	upstream oil
Libya	LBY	5545	26.0319	11.9778	0.0553639	1768.49	1.35334	0.671233	365	upstream oil
Saudi Arabia	SAU	7765	26.7812	49.9994	0.0553063	1756.68	2.42708	0.984227	317	upstream oil
Russian Federation	RUS	9256	67.5579	83.2104	0.0552109	1241.92	0.818647	0.862069	145	upstream oil
Russian Federation	RUS	6619	52.8725	51.2206	0.0549585	1779.41	4.61997	0.670588	170	upstream oil
Russian Federation	RUS	10070	60.9833	97.1622	0.0549567	1503.41	0.827222	0.910256	156	upstream oil
Venezuela	VEN	4194	9.63981	-63.6148	0.054768	1951.88	1.6015	0.829787	94	upstream oil
Ecuador	ECU	4412	-0.528776	-76.1251	0.0546755	1884.23	3.42215	0.818182	33	upstream oil
Russian Federation	RUS	8696	62.4196	74.346	0.0546553	1813.95	2.08318	0.855346	159	upstream oil
Argentina	ARG	4564	-38.0987	-68.6654	0.0544936	1817.07	1.72655	0.86	300	upstream oil
Libya	LBY	5602	28.2089	19.914	0.0544586	1714.02	1.33309	0.779891	368	upstream oil
Oman	OMN	8296	18.5575	55.8703	0.0544331	1750.78	1.22623	0.973294	337	upstream oil
India	IND	10465	27.3205	95.2713	0.0542352	1722.47	1.08489	0.913043	161	upstream oil
Algeria	DZA	5466	27.9269	9.10613	0.0542009	1726.56	1.16938	0.983562	365	upstream oil
Iran	IRN	7816	29.7616	50.3698	0.0538886	1740.1	1.16156	0.721362	323	upstream oil
Russian Federation	RUS	8448	61.4272	67.272	0.0537905	1793.35	2.16711	0.855856	111	upstream oil
Qatar	QAT	7963	26.6356	51.9528	0.053736	1631.82	1.34737	0.989967	299	upstream oil
Algeria	DZA	5351	31.6464	5.99195	0.0536863	1744.03	1.48718	0.989011	364	upstream oil
Iraq	IRQ	7369	30.4895	47.6084	0.0535692	1744.48	1.19678	0.972973	296	upstream oil
Russian Federation	RUS	9083	66.3306	77.8315	0.0535334	1686.02	1.72099	0.836207	116	upstream oil
Thailand Malaysia Joint Development Area	THAMYSJDA	11311	7.16679	103.098	0.0534181	1369.35	1.25667	0.983871	62	upstream oil
Syria	SYR	7090	34.9102	40.827	0.0533312	1714.41	1.26052	0.9375	336	upstream oil
Equatorial Guinea	GNQ	6055	1.41125	9.22976	0.0532537	1667.64	2.2596	1	13	upstream oil
Chad	TCD	5882	10.2534	16.9537	0.0531054	1804.96	1.25872	1	151	upstream oil
Chad	TCD	5881	8.53488	16.7944	0.0530667	1700.06	1.48739	0.992248	129	upstream oil
Egypt	EGY	5738	30.5382	28.4936	0.0530045	1715.8	1.16415	0.967302	367	upstream oil
Iraq	IRQ	7244	34.6601	45.5917	0.0530001	1788.45	1.53952	0.925816	337	upstream oil
Iraq	IRQ	7183	35.9242	43.7898	0.0527811	1809	0.912882	0.953846	325	upstream oil
Algeria	DZA	5508	27.7241	9.87894	0.0526995	1643.35	1.2035	0.922252	373	upstream oil
Hungary	HUN	5201	45.9846	17.7374	0.0526836	1797.4	2.57704	0.801498	267	upstream oil
Iraq	IRQ	7226	35.1242	44.5696	0.052511	1709.62	1.19884	0.969697	330	upstream oil
Russian Federation	RUS	8634	60.5362	72.9557	0.0524978	1793.55	1.54431	0.925743	202	upstream oil
Guyana	GUY	4652	8.01013	-56.9124	0.0523387	1689.25	1.6015	0.485149	101	upstream oil
Iraq	IRQ	7375	30.3539	47.6593	0.0523094	1765.63	1.28374	0.977707	314	upstream oil
Cameroon	CMR	6006	4.29316	8.4082	0.0522795	1716.84	2.17146	0.9375	16	upstream oil
Venezuela	VEN	4120	9.66142	-64.2623	0.0522522	1815.05	1.41055	0.675	160	upstream oil
Iran	IRN	7887	30.2543	50.7424	0.0521465	1803.25	1.39694	0.989547	287	upstream oil
Sudan	SDN	5893	11.0429	28.4988	0.0521268	1611.2	0.8043	0.844086	186	upstream oil
Algeria	DZA	5475	31.6484	9.172	0.0521221	1761.7	1.15849	0.986486	370	upstream oil
Iran	IRN	8005	27.9301	52.1955	0.0521118	1628.29	1.72182	0.954407	329	upstream oil
Guatemala	GTM	3732	17.042	-90.5812	0.0521072	1840.13	1.56883	0.837662	154	upstream oil
Vietnam	VNM	11360	9.97238	107.971	0.0520558	1731.74	1.7968	0.944444	72	upstream oil
Russian Federation	RUS	8896	64.959	76.6334	0.0519845	1698.14	0.799408	0.462366	93	upstream oil
Libya	LBY	5629	28.7109	21.3822	0.0519393	1676.54	1.29875	0.967828	373	upstream oil
Iraq	IRQ	7211	35.555	44.2674	0.0518145	1727.14	1.32699	0.958065	310	upstream oil
Russian Federation	RUS	8594	60.6084	72.3831	0.0516672	1900.97	1.6015	0.793651	189	upstream oil
Russian Federation	RUS	8575	59.0507	71.8625	0.051378	1809.68	1.30734	0.936364	220	upstream oil
Saudi-Kuwaiti Neutral Zone	SAUKWTNZ	7418	28.4542	47.8756	0.0512832	1760.73	1.32247	0.832845	341	upstream oil
Iran	IRN	7590	30.947	49.1848	0.0512829	1777.34	1.1644	0.961877	341	upstream oil
Nigeria	NGA	5927	4.65568	6.61497	0.0510138	1704.21	1.64881	0.885246	61	upstream oil
Russian Federation	RUS	10182	58.4275	107.368	0.0508726	1607.71	0.707695	0.921569	102	upstream oil
Russian Federation	RUS	6371	67.8371	58.9403	0.0507405	1830.38	2.08637	0.79798	99	upstream oil
Libya	LBY	5548	31.3968	12.1459	0.0506551	1776.93	1.51081	0.821918	365	upstream oil
India	IND	9876	19.1769	70.9459	0.050476	1723.35	1.6399	1	223	upstream oil
Cameroon	CMR	6008	4.31345	8.40762	0.0504194	1716.27	1.84838	1	14	upstream oil
Russian Federation	RUS	8625	63.2447	72.836	0.0504053	1819.97	1.68463	0.902597	154	upstream oil
Gabon	GAB	6036	-1.52788	8.73147	0.0502591	1736.3	1.59224	0.880952	42	upstream oil
Libya	LBY	5567	28.5816	17.3317	0.0501927	1682.28	1.03322	0.975275	364	upstream oil
Gabon	GAB	6092	-3.92597	10.9243	0.0499189	1714.48	1.46031	1	25	upstream oil
Equatorial Guinea	GNQ	6056	1.54138	9.29567	0.0498088	1729.08	1.52951	0.8125	16	upstream oil
Libya	LBY	5653	28.7848	22.4598	0.0497689	1774.23	1.27848	0.681462	383	upstream oil
Nigeria	NGA	5774	5.91397	4.88025	0.0497598	1659.39	0.938993	1	42	upstream oil
Kazakhstan	KAZ	9295	46.0518	65.043	0.0496374	1825.3	1.42469	0.905045	337	upstream oil
Congo	COG	6108	-4.62019	11.3558	0.0496022	1805.88	1.85169	0.979592	49	upstream oil
Russian Federation	RUS	8859	67.014	76.1889	0.0495085	1711.29	1.47206	0.48503	167	upstream oil
Russian Federation	RUS	8418	60.8151	65.4255	0.0494155	1812.51	1.42389	0.736842	114	upstream oil
Libya	LBY	5600	27.9848	19.9053	0.0494064	1625.36	1.35926	0.866485	367	upstream oil
Nigeria	NGA	6004	4.31722	8.36579	0.0493374	1714.6	1.35052	0.857143	14	upstream oil
Algeria	DZA	5477	27.7356	9.1804	0.0493262	1689.37	1.1135	0.997297	370	upstream oil
Cameroon	CMR	6007	4.17888	8.40566	0.0491534	1667.32	2.29691	0.684211	19	upstream oil
Brazil	BRA	4749	-24.6503	-42.515	0.049107	1672.42	1.30864	0.879747	158	upstream oil
Brunei	BRN	11419	5.21132	114.743	0.0489899	1717.93	3.54605	0.866667	15	upstream oil
Iraq	IRQ	7332	30.4251	47.444	0.0489702	1737.36	1.41545	0.9	330	upstream oil
United Arab Emirates	ARE	8160	25.6	54.4253	0.0486388	1546.54	1.44902	0.955975	318	upstream oil
Mexico	MEX	3718	19.5176	-92.156	0.0485593	1638.34	1.23513	0.968553	159	upstream oil
Mexico	MEX	3712	19.3016	-92.201	0.0484298	1634.33	1.41359	0.987421	159	upstream oil
Gabon	GAB	6095	-3.95551	10.9625	0.0483723	1771.72	2.20301	1	26	upstream oil
Iraq	IRQ	7162	36.7468	43.4991	0.0482839	1880.6	1.49644	0.969388	294	upstream oil
Mexico	MEX	3643	18.4877	-93.3443	0.0482267	1733.82	1.31332	0.703704	135	upstream oil
Angola	AGO	6192	-7.11914	12.3658	0.048192	1651.64	1.8403	0.729167	48	upstream oil
Thailand	THA	11307	8.02952	102.315	0.0481785	1766.39	1.49023	0.964286	56	upstream oil
Iraq	IRQ	7191	36.5292	43.9769	0.0480482	1852.55	1.61808	0.969492	295	upstream oil
Iran	IRN	7268	33.7216	46.2991	0.0479963	1794.19	1.6015	0.78882	322	upstream oil
Mexico	MEX	3555	20.5153	-97.4783	0.0479326	1708.57	2.21235	0.666667	168	upstream oil
Tunisia	TUN	5440	33.3651	8.54901	0.0478668	1689.79	1.64954	0.961003	359	upstream oil
Algeria	DZA	5317	33.0669	3.3321	0.0477206	1736.66	1.39109	0.974359	312	upstream oil
Venezuela	VEN	4201	9.63993	-63.6038	0.0476828	1862.77	1.6015	0.983193	119	upstream oil
Brazil	BRA	4755	-24.5845	-42.2565	0.0475977	1669.83	1.6015	0.284848	165	upstream oil
Russian Federation	RUS	8666	60.2369	73.7048	0.0475821	1901.63	1.94972	0.938547	179	upstream oil
Iran	IRN	7710	28.6211	49.6321	0.0474582	1706.3	1.62434	0.987097	310	upstream oil
Russian Federation	RUS	8614	61.019	72.6192	0.0474362	1838.75	1.24239	0.930818	159	upstream oil
Norway	NOR	4969	57.8142	4.53458	0.0474162	1658.75	1.6015	0.410256	156	upstream oil
Qatar	QAT	7962	26.5315	51.9488	0.04699	1816.74	1.88267	0.936877	301	upstream oil
India	IND	10482	27.5578	96.0401	0.0469701	1812.49	1.23252	0.929577	142	upstream oil
Kuwait	KWT	7350	29.0343	47.5412	0.0469625	1612.01	1.27449	0.768769	333	upstream oil
Venezuela	VEN	4138	9.62337	-63.7699	0.0469334	1779.2	0.985542	0.91791	134	upstream oil
China	CHN	11227	38.3732	119.096	0.0469296	1758.62	1.99141	0.987179	234	upstream oil
Algeria	DZA	5322	31.8476	5.05538	0.0468988	1660.84	1.16577	0.980226	354	upstream oil
Russian Federation	RUS	10115	57.7953	105.882	0.04685	1495.97	1.03233	0.613497	163	upstream oil
Russian Federation	RUS	8486	61.9805	68.5742	0.0467702	1607.33	0.586041	0.948052	154	upstream oil
Iran	IRN	7817	29.7442	50.3694	0.0467699	1817.26	1.85513	0.652308	325	upstream oil
Yemen	YEM	8257	15.3764	46.8325	0.0467379	1715.28	1.3337	0.958065	310	upstream oil
Saudi Arabia	SAU	7633	25.1757	49.3194	0.0466842	1632.22	1.31052	0.982808	349	upstream oil
Argentina	ARG	4577	-38.2809	-68.59	0.0464761	1784.22	2.06408	0.600639	313	upstream oil
Syria	SYR	7132	36.9417	42.1719	0.0464464	1571.05	1.12758	0.972973	296	upstream oil
Ukraine	UKR	6378	45.3745	30.9301	0.0463616	1656.32	0.511924	0.449782	229	upstream oil
Russian Federation	RUS	8863	59.1737	76.2442	0.0463513	1793.21	1.63899	0.94	200	upstream oil
Angola	AGO	6096	-6.1409	11.0315	0.0462735	1677.49	2.16302	0.966667	90	upstream oil
Russian Federation	RUS	8733	61.0732	75.0198	0.0462715	1890.68	1.85294	0.932203	177	upstream oil
China	CHN	9391	40.5841	82.7457	0.0461658	1702.41	1.6015	0.809689	289	upstream oil
Iran	IRN	7257	33.0155	46.126	0.0459131	1610.6	0.969857	0.981366	322	upstream oil
Nigeria	NGA	5917	4.62892	6.26368	0.0457646	1707.26	1.6015	0.926471	68	upstream oil
Oman	OMN	8342	21.3323	56.6991	0.0456345	1820.9	1.94755	0.808383	334	upstream oil
Russian Federation	RUS	6355	68.6153	57.9553	0.0454	1812.86	1.6015	0.646465	99	upstream oil
Saudi Arabia	SAU	7718	25.9308	49.7004	0.0453542	1710.45	1.15535	0.9875	320	upstream oil
Cameroon	CMR	6013	4.25671	8.43249	0.0453369	1751.04	1.65988	0.933333	15	upstream oil
Iran	IRN	7829	30.4915	50.4664	0.045287	1847.32	1.68937	0.814465	318	upstream oil
Iran	IRN	7618	31.6496	49.2689	0.0451672	1676.44	1.03904	0.903427	321	upstream oil
Kazakhstan	KAZ	6748	46.1564	53.4103	0.0451446	1691.64	1.43252	0.842491	273	upstream oil
Nigeria	NGA	5913	4.81372	5.96194	0.0451332	1763.67	1.6015	0.964286	84	upstream oil
Saudi Arabia	SAU	7603	27.1498	49.2184	0.0450108	1678.72	0.82225	0.959459	296	upstream oil
Qatar	QAT	7971	26.5905	52.0002	0.0449632	1664.24	1.30843	0.928339	307	upstream oil
Russian Federation	RUS	6370	67.838	58.9222	0.0448487	1821.93	2.60962	0.676471	102	upstream oil
United Arab Emirates	ARE	8163	25.3514	54.486	0.044739	1721.8	1.5085	0.972308	325	upstream oil
Oman	OMN	8273	18.3205	55.1041	0.0447099	1799.1	1.99537	0.841642	341	upstream oil
United Arab Emirates	ARE	8171	22.7822	54.7292	0.0446888	1744.63	4.80368	0.843478	345	upstream oil
Russian Federation	RUS	8833	59.8169	75.9829	0.0445772	1934.45	1.55576	0.961957	184	upstream oil
Gabon	GAB	6082	-1.58855	9.97397	0.0445766	1675.8	1.47916	0.780488	41	upstream oil
Russian Federation	RUS	8680	58.9606	73.9618	0.0444865	1904.56	1.6583	0.94686	207	upstream oil
Algeria	DZA	5391	32.1639	6.85213	0.044326	1749.22	0.972005	0.697613	377	upstream oil
Saudi Arabia	SAU	7755	26.7848	49.9555	0.0442943	1769.15	2.53349	0.975309	324	upstream oil
Iran	IRN	7888	30.2426	50.7564	0.0442846	1848.19	1.59183	0.962457	293	upstream oil
Iran	IRN	7733	30.4005	49.8316	0.0442552	1870.37	1.14305	0.640483	331	upstream oil
China	CHN	11875	39.9556	120.807	0.0442197	1807.8	2.18733	0.877953	254	upstream oil
Algeria	DZA	5343	31.6989	5.96375	0.0441581	1711.34	1.61341	0.99446	361	upstream oil
Iraq	IRQ	7138	37.0808	42.4953	0.0440885	1773.14	1.30085	0.972509	291	upstream oil
Iran	IRN	7870	30.3482	50.6275	0.0440853	1780.9	1.23287	0.689103	312	upstream oil
Nigeria	NGA	5998	4.29045	8.16674	0.0439708	1642.72	2.32613	0.882353	17	upstream oil
Yemen	YEM	8264	15.8247	48.9559	0.0439485	1813.6	1.28882	0.984424	321	upstream oil
Russian Federation	RUS	8886	61.1402	76.527	0.0438871	1645.58	1.54006	0.863946	147	upstream oil
Brazil	BRA	4743	-25.3302	-42.6926	0.0438681	1685.32	1.45908	0.918367	147	upstream oil
Venezuela	VEN	4218	9.66994	-63.5647	0.0438026	1992.73	3.43882	0.926829	123	upstream oil
Mexico	MEX	3637	17.9149	-93.3782	0.0437873	1728.94	2.00366	0.807229	166	upstream oil
Congo	COG	6126	-5.27246	11.5653	0.0437116	1698.02	2.18523	0.982143	56	upstream oil
Oman	OMN	8319	20.5586	56.4206	0.0435672	1769.38	1.17846	0.973761	343	upstream oil
Russian Federation	RUS	6651	52.2214	51.8367	0.043377	1814.97	1.4871	0.907801	141	upstream oil
Algeria	DZA	5315	32.8378	3.24005	0.0433136	1763.24	1.39238	0.975078	321	upstream oil
Algeria	DZA	5420	30.1805	7.68991	0.0433013	1824.47	2.19104	0.989305	374	upstream oil
Russian Federation	RUS	9112	59.6731	78.7624	0.0432745	1754.75	1.60705	0.926829	205	upstream oil
Russian Federation	RUS	6327	57.6624	57.1414	0.0432038	1868.09	1.57218	0.918129	171	upstream oil
Yemen	YEM	8247	15.6131	46.0155	0.0431339	1688.62	1.36185	0.978328	323	upstream oil
Iran	IRN	7357	32.1489	47.5845	0.0431119	1535.74	1.0555	0.973294	337	upstream oil
Russian Federation	RUS	10253	60.3556	111.699	0.0430603	1762.51	1.62867	0.951515	165	upstream gas
Iraq	IRQ	7182	36.1302	43.7852	0.0430388	1898.09	1.72508	0.889968	309	upstream oil
Iraq	IRQ	7174	36.3118	43.7548	0.0429273	1843.21	2.22427	0.926282	312	upstream oil
Iraq	IRQ	7240	31.242	45.2557	0.0429094	1774.57	1.32093	0.988636	352	upstream oil
Russian Federation	RUS	8572	60.8759	71.8235	0.0427932	1720.97	2.144	0.542553	188	upstream oil
Vietnam	VNM	11377	10.4228	108.394	0.0427479	1713.88	1.17963	1	67	upstream oil
Tunisia	TUN	5496	33.5297	9.68498	0.0427318	1664.05	1.2147	0.961988	342	upstream oil
Oman	OMN	8287	21.4097	55.7451	0.0425971	1785.18	1.61615	0.976331	338	upstream oil
Nigeria	NGA	5795	6.15365	5.34266	0.0424826	1865.48	1.45037	0.955556	90	upstream oil
Indonesia	IDN	11568	-5.44194	106.332	0.0424738	1664.3	1.74483	0.9375	16	upstream oil
Venezuela	VEN	4276	9.87302	-63.312	0.0424553	1852.7	2.08894	0.594118	170	upstream oil
Kuwait	KWT	7341	30.0394	47.4957	0.0424359	1848.57	1.38426	0.948328	329	upstream oil
Iraq	IRQ	7166	36.1005	43.6302	0.0423162	1788.27	1.47849	0.964052	306	upstream oil
Saudi Arabia	SAU	7800	24.7017	50.2588	0.0423138	1730.85	0.983047	0.407625	341	upstream oil
Mexico	MEX	3664	17.7207	-93.1532	0.0421958	1806.17	1.91858	0.819876	161	upstream oil
Congo	COG	6159	-4.8669	12.0412	0.0421588	1802.21	1.6015	0.928571	56	upstream oil
Yemen	YEM	8266	15.5947	49.1297	0.0421054	1755.44	1.19496	0.981308	321	upstream oil
Russian Federation	RUS	6812	51.9046	54.5122	0.0419945	1801.59	1.54194	0.908537	164	upstream oil
Iraq	IRQ	7198	36.6912	44.0709	0.041914	1859.77	2.10655	0.949833	299	upstream oil
Qatar	QAT	8033	25.4918	52.3874	0.041863	1602.37	1.74115	0.965409	318	upstream oil
Pakistan	PAK	9715	25.4003	68.5669	0.04185	1812.94	1.36114	0.990909	330	upstream oil
Iraq	IRQ	7192	35.7725	43.996	0.0418418	1719.68	0.979734	0.965625	320	upstream oil
United Arab Emirates	ARE	8141	24.6072	54.1511	0.0418092	1755.85	1.34402	0.981707	328	upstream oil
Canada	CAN	4650	46.7885	-48.0162	0.0416927	1780.36	1.33233	0.9375	80	upstream oil
United Arab Emirates	ARE	8104	24.8561	53.6215	0.0416733	1682.27	2.24526	1	323	upstream oil
Russian Federation	RUS	9055	62.3667	77.4552	0.0416504	1723.37	1.31875	0.829787	141	upstream oil
Gabon	GAB	6046	-1.16243	8.8621	0.0416484	1685.65	2.16965	0.736842	38	upstream oil
Algeria	DZA	5362	31.6314	6.06258	0.0416111	1734.36	1.36026	0.99446	361	upstream oil
Russian Federation	RUS	10161	58.0307	106.833	0.0415659	1594.51	0.438694	0.406452	155	upstream oil
India	IND	9891	18.5773	72.2413	0.0415489	1646.23	1.59693	0.976636	214	upstream oil
Russian Federation	RUS	6360	66.4209	58.0422	0.0415321	1691.85	1.90161	0.8125	144	upstream oil
China	CHN	9464	40.5013	83.5641	0.0415154	1736.24	1.10367	0.942748	262	upstream oil
Russian Federation	RUS	9103	57.6082	78.3964	0.0414858	1883.9	2.01664	0.768473	203	upstream oil
Russian Federation	RUS	6711	52.8106	53.0166	0.0414162	1729.13	2.56628	0.719745	157	upstream oil
Algeria	DZA	5458	28.715	8.9483	0.0413901	1765.69	1.40869	0.955432	359	upstream oil
Syria	SYR	7122	36.9145	41.8959	0.0412865	1685.07	1.29709	0.975439	285	upstream oil
Brazil	BRA	4443	-4.86322	-65.2945	0.0412374	1836.56	1.6015	0.711111	45	upstream oil
Syria	SYR	7086	35.1113	40.5223	0.0412366	1630.03	1.2916	0.933333	345	upstream oil
Russian Federation	RUS	10332	55.3629	106.141	0.0412351	1712.41	0.655038	0.961326	181	upstream gas
Iran	IRN	7839	30.446	50.4967	0.041184	1825.74	1.57263	0.980831	313	upstream oil
Iran	IRN	7697	29.2707	49.5697	0.0411068	1706.56	2.00498	0.804348	322	upstream oil
Canada	CAN	4648	46.7505	-48.7806	0.0409894	1737.24	1.69417	0.648352	91	upstream oil
Saudi Arabia	SAU	7664	25.6811	49.4098	0.0409665	1659.59	1.15491	0.985251	339	upstream oil
Libya	LBY	5635	29.1902	21.5302	0.0408967	1725.79	1.58548	0.836412	379	upstream oil
Vietnam	VNM	11379	10.3855	108.507	0.0408661	1691.79	1.68248	0.932432	74	upstream oil
Brazil	BRA	4798	-21.9071	-39.7352	0.040806	1757.15	2.12889	0.780488	164	upstream oil
Egypt	EGY	5671	30.4828	25.8411	0.0407431	1693.33	0.881422	0.957672	378	upstream oil
Iraq	IRQ	7206	35.4084	44.2232	0.040739	1696.28	1.0258	0.993421	304	upstream oil
Libya	LBY	5632	29.145	21.4538	0.0406472	1683.61	1.10629	0.726316	380	upstream oil
Indonesia	IDN	11525	-3.36159	104.008	0.0406436	1694.23	1.6015	0.8	10	upstream oil
China	CHN	9442	40.3055	83.3228	0.0406304	1775.67	1.07216	0.966102	236	upstream oil
Oman	OMN	8326	19.3356	56.4702	0.0405773	1896.16	1.63763	0.967164	335	upstream oil
Egypt	EGY	5678	30.8245	26.4702	0.0405479	1714.66	1.14498	0.930108	372	upstream oil
Algeria	DZA	5335	31.4949	5.8458	0.0405424	1660.59	0.985553	0.95082	366	upstream oil
United Arab Emirates	ARE	8079	24.8775	53.0733	0.0405388	1723.74	1.72688	0.894578	332	upstream oil
Angola	AGO	6191	-6.24044	12.3592	0.0404881	1777.27	1.14655	0.846154	78	upstream oil
Egypt	EGY	5677	30.6709	26.3676	0.0404798	1659.7	0.941339	0.93883	376	upstream oil
Venezuela	VEN	4224	9.62686	-63.5631	0.0403947	2004.79	4.73182	0.97479	119	upstream oil
Venezuela	VEN	4102	9.26919	-64.7174	0.040228	1838.08	1.8068	0.914894	141	upstream oil
Nigeria	NGA	5956	4.93016	7.01617	0.0402033	1771.14	2.94296	0.690141	71	upstream oil
Oman	OMN	8270	18.0129	54.5727	0.0400542	1799.49	3.79871	0.800587	341	upstream oil
Russian Federation	RUS	10022	60.431	96.2751	0.0400281	1571.14	1.6015	0.864407	118	upstream oil
Saudi Arabia	SAU	7512	27.9986	48.7393	0.0399996	1671.15	1	0.980892	314	upstream oil
Russian Federation	RUS	10206	59.4657	108.073	0.0399894	1881.31	1.92939	0.915254	177	upstream oil
Russian Federation	RUS	9344	57.2696	79.3896	0.0399712	1768.73	1.99956	0.933036	224	upstream oil
Mexico	MEX	3711	19.5912	-92.2026	0.0398998	1490.23	1.30236	0.980392	153	upstream oil
Iran	IRN	7586	31.2486	49.1678	0.0398124	1703.91	1.24416	0.965732	321	upstream oil
Iran	IRN	7840	30.519	50.5132	0.0397217	1855.56	1.37153	0.965625	320	upstream oil
Nigeria	NGA	5967	4.89252	7.12002	0.0397211	1713.48	2.98884	0.513514	74	upstream oil
Iraq	IRQ	7376	30.3415	47.6581	0.0396468	1723.64	1.04641	0.993506	308	upstream oil
Iran	IRN	7661	29.4764	49.3915	0.0396125	1734.62	1.62382	0.936709	316	upstream oil
Iraq	IRQ	7205	35.4191	44.2198	0.0395159	1751.92	1.27049	0.96732	306	upstream oil
Oman	OMN	8297	20.3756	55.9347	0.0394983	1669.58	1.22005	0.831395	344	upstream oil
Yemen	YEM	8253	15.3992	46.7904	0.0394234	1744.17	1.2368	0.771704	311	upstream oil
Gabon	GAB	6063	-1.80707	9.79721	0.0394108	1693.17	2.91232	0.6	50	upstream oil
Iran	IRN	7682	29.3301	49.4941	0.0394088	1712.32	1.96996	0.965079	315	upstream oil
Venezuela	VEN	4127	9.2272	-64.0588	0.0393589	1771.85	2.18858	0.526946	167	upstream oil
Oman	OMN	8365	20.9862	57.7984	0.0392934	1842.59	1.78038	0.882857	350	upstream oil
Iran	IRN	7841	30.4362	50.5071	0.0392629	1817.65	1.32375	0.942675	314	upstream oil
Iran	IRN	7892	30.2191	50.7858	0.0392511	1780.94	1.5327	0.889632	299	upstream oil
Mexico	MEX	3623	18.406	-93.7714	0.0392015	1835.97	1.6015	0.308219	146	upstream oil
Algeria	DZA	5374	31.6807	6.19495	0.0391707	1721.39	1.86131	0.933333	360	upstream oil
Nigeria	NGA	5909	4.32669	5.82174	0.0391314	1626.22	2.06624	0.779661	59	upstream oil
Syria	SYR	7089	36.1437	40.8157	0.0390333	1812.29	1.70145	0.915663	332	upstream oil
Russian Federation	RUS	6508	44.9131	45.2869	0.0389617	1747.52	1.37161	0.792793	222	upstream oil
Iran	IRN	7910	30.229	50.8923	0.0389511	1814.64	1.80655	0.61465	314	upstream oil
Saudi Arabia	SAU	7666	24.7916	49.41	0.0389233	1758.26	2.1734	0.977011	348	upstream oil
Iran	IRN	7722	30.7997	49.7472	0.038918	1762.28	1.28921	0.907692	325	upstream oil
Russian Federation	RUS	6627	52.646	51.3555	0.0389112	1801.55	1.69529	0.924138	145	upstream oil
United Arab Emirates	ARE	8108	23.8507	53.655	0.0388525	1760.44	3.00991	0.974212	349	upstream oil
Algeria	DZA	5426	30.3889	7.90649	0.0388114	1720.16	1.41081	0.99169	361	upstream oil
Nigeria	NGA	5819	5.52193	6.05879	0.0387328	1711.15	1.29308	0.797297	74	upstream oil
Venezuela	VEN	4126	8.52677	-64.0722	0.0387087	1763.49	3.47103	0.507937	126	upstream oil
Algeria	DZA	5389	29.67	6.72451	0.0386975	1760.71	3.92251	0.911688	385	upstream oil
Indonesia	IDN	11475	-1.06276	103.243	0.0386864	1787.77	1.83393	0.805556	36	upstream oil
Mexico	MEX	3691	18.3929	-92.8279	0.0386103	1747.8	1.3367	0.908571	175	upstream oil
Venezuela	VEN	4071	9.51356	-70.9796	0.0383814	1763.82	2.85067	0.77551	49	upstream oil
Mexico	MEX	3654	17.8287	-93.2438	0.0382883	1890.4	1.4164	0.812865	171	upstream gas
Iran	IRN	7875	30.3281	50.6573	0.0381328	1764.57	1.3806	0.692557	309	upstream oil
Sudan	SDN	5892	11.3232	28.4713	0.0380453	1764.38	1.32669	0.97	200	upstream oil
Mexico	MEX	3620	18.2196	-93.8946	0.0380101	1726.29	2.93641	0.699454	183	upstream oil
Iraq	IRQ	7301	31.0229	47.3206	0.0379693	1474.65	1.6015	0.939873	316	upstream oil
Iran	IRN	7258	33.0288	46.1399	0.0379423	1655.92	0.787925	0.92284	324	upstream oil
Egypt	EGY	5716	30.934	27.5557	0.0379247	1849.63	2.31543	0.863128	358	upstream oil
Iraq	IRQ	7221	35.2471	44.43	0.0379197	1719.1	1.20678	0.938235	340	upstream oil
Iraq	IRQ	7294	32.4538	47.2981	0.0379117	1766.36	1.25882	0.964179	335	upstream oil
Egypt	EGY	5712	30.8958	27.3443	0.0378886	1766.82	1.11267	0.87395	357	upstream oil
United States	USA	2712	32.048	-100.684	0.0378416	1781.63	1.74116	0.510836	323	upstream oil
Malaysia	MYS	11420	5.61806	114.89	0.0378099	1624.39	1.95807	1	21	upstream oil
Iran	IRN	7861	30.4106	50.5925	0.0376775	1783.91	1.68842	0.669841	315	upstream oil
Iran	IRN	7867	30.3808	50.6125	0.0376514	1626.7	1.65768	0.819079	304	upstream oil
Russian Federation	RUS	8746	64.4095	75.3731	0.0376367	1856.01	1.60482	0.763441	93	upstream oil
Algeria	DZA	5408	28.471	7.51279	0.0374295	1671.92	1.23775	0.988764	356	upstream oil
Russian Federation	RUS	9263	67.7143	83.5024	0.0373887	1747.49	2.12383	0.650602	166	upstream oil
Egypt	EGY	6998	31.3255	32.1428	0.0372642	1759.52	1.47916	0.977987	318	upstream oil
Indonesia	IDN	11546	-3.53438	104.305	0.0372563	1697.69	1.6015	0.846154	13	upstream oil
Russian Federation	RUS	10186	58.4216	107.444	0.037214	1611.05	0.736969	0.9	120	upstream oil
Libya	LBY	5588	29.7115	19.7139	0.0371794	1524.47	1.06226	0.81137	387	upstream oil
Kazakhstan	KAZ	9298	46.164	65.2809	0.0371688	1868.09	1.57527	0.877301	326	upstream oil
United States	USA	2297	32.1903	-102.007	0.0371674	1744.91	1.6015	0.12963	324	upstream oil
Russian Federation	RUS	8757	61.4884	75.4638	0.0371424	1871.14	1.6015	0.528302	159	upstream oil
Russian Federation	RUS	9262	67.714	83.484	0.0371248	1766.99	1.7176	0.68	150	upstream oil
Egypt	EGY	5681	30.8551	26.622	0.0371151	1712.53	1.17989	0.930295	373	upstream oil
Mexico	MEX	3631	18.4794	-93.4576	0.0370338	1833.89	1.18348	0.903704	135	upstream oil
Oman	OMN	8186	22.9273	55.8046	0.0370115	1788.55	1.27374	0.907514	346	upstream oil
Gabon	GAB	6032	-1.14555	8.69818	0.0369686	1609.77	1.14555	0.886364	44	upstream oil
India	IND	10472	27.6052	95.4022	0.0369675	1764.45	1.96182	0.882716	162	upstream oil
Russian Federation	RUS	10098	60.7582	97.5531	0.0369226	1740.65	0.769773	0.455	200	upstream oil
Russian Federation	RUS	8624	60.8917	72.7986	0.0368897	1790.84	1.64341	0.907975	163	upstream oil
Russian Federation	RUS	6519	49.9979	45.585	0.0368357	1814.19	1.45441	0.874346	191	upstream oil
Iran	IRN	7766	30.2917	50.0081	0.036801	1688.73	0.84712	0.746951	328	upstream oil
Iran	IRN	7601	31.2082	49.2192	0.0367993	1763.53	1.45583	0.963746	331	upstream oil
Ecuador	ECU	4396	-0.24615	-76.6555	0.0367814	1774.2	2.31899	0.8125	48	upstream oil
Oman	OMN	8337	21.8341	56.6817	0.0367737	1726.06	1.1121	0.972561	328	upstream oil
Libya	LBY	5578	28.1019	19.2521	0.0367673	1720.47	1.18963	0.758974	390	upstream oil
Bahrain	BHR	7853	26.0384	50.5611	0.036762	1760.01	1.53506	0.978852	331	upstream oil
Russian Federation	RUS	9074	64.4195	77.7046	0.0366666	1702.05	1.54562	0.808696	115	upstream oil
Angola	AGO	6104	-6.16026	11.2706	0.0365213	1666.16	1.57926	0.83908	87	upstream oil
Oman	OMN	8302	22.1579	56.0267	0.0364335	1756.11	1.5093	0.594595	333	upstream oil
Iran	IRN	8075	25.938	52.9017	0.0364233	1731.76	1.84718	0.972308	325	upstream oil
Ecuador	ECU	4338	-0.469301	-76.9004	0.0363968	1832.15	2.25916	0.885714	35	upstream oil
Algeria	DZA	5332	31.6887	5.80916	0.0363681	1711.67	1.84043	0.97486	358	upstream oil
Iraq	IRQ	7136	37.0807	42.4528	0.0363238	1746.81	1.0629	0.922034	295	upstream oil
Libya	LBY	5624	28.1601	21.225	0.0363035	1762.65	2.14599	0.885333	375	upstream oil
Turkmenistan	TKM	6697	40.1695	52.7696	0.0362962	1813.67	1.55855	0.940639	219	upstream oil
Algeria	DZA	5323	31.9606	5.21649	0.036236	1714.35	1.60179	0.942466	365	upstream oil
Cameroon	CMR	6024	4.33017	8.6056	0.0361746	1712.4	2.20629	0.833333	18	upstream oil
Oman	OMN	8345	21.8913	56.8473	0.0360505	1696.4	0.914155	0.963415	328	upstream oil
Oman	OMN	8340	22.4421	56.7001	0.0360496	1709.65	1.23599	0.980392	357	upstream oil
Russian Federation	RUS	6893	56.5252	56.6595	0.0360393	1887.83	1.99229	0.89881	168	upstream oil
Vietnam	VNM	11362	9.75262	107.984	0.03599	1694.94	1.58068	0.967742	62	upstream oil
Iran	IRN	7890	30.2239	50.7694	0.0359598	1810.8	1.14021	0.828283	297	upstream oil
Saudi Arabia	SAU	7613	28.3825	49.2551	0.0358893	1697.47	1.90038	0.83125	320	upstream oil
Brazil	BRA	4751	-24.7896	-42.51	0.0358876	1712.25	1.56245	0.729885	174	upstream oil
China	CHN	11389	20.7959	108.725	0.0358388	1778.62	2.67635	0.946237	93	upstream oil
Russian Federation	RUS	8619	60.8621	72.6835	0.0358121	1883.07	1.54727	0.924419	172	upstream oil
Mexico	MEX	3628	18.4873	-93.5022	0.0357285	1733.79	1.16221	0.686567	134	upstream oil
Iraq	IRQ	7284	31.6932	47.2549	0.0356968	1760.49	0.98796	0.943284	335	upstream oil
Angola	AGO	6142	-7.68312	11.7626	0.0356398	1528.59	1.60572	0.985714	70	upstream oil
Russian Federation	RUS	11836	52.5115	143.185	0.0356301	1835.01	0.950211	0.851613	155	upstream oil
Cameroon	CMR	6015	4.28583	8.44983	0.0356114	1664.96	1.71041	0.9375	16	upstream oil
United States	USA	790	48.1121	-102.903	0.0354167	1934.62	1.59646	0.895288	191	upstream oil
India	IND	9878	18.5867	71.0331	0.0353977	1741.12	1.48573	0.969697	231	upstream oil
Algeria	DZA	5431	31.1784	8.10492	0.0353786	1667.59	1.29043	0.981233	373	upstream oil
Iran	IRN	7848	30.0843	50.5418	0.0352905	1771.05	1.69081	0.455414	314	upstream oil
Russian Federation	RUS	9258	67.5936	83.2458	0.0351634	1551.05	0.709029	0.82069	145	upstream oil
Argentina	ARG	4575	-38.3926	-68.5978	0.0350918	1790.11	1.61178	0.349206	315	upstream oil
Turkmenistan	TKM	8054	39.4749	52.6557	0.0350883	1834.34	1.64773	0.995816	239	upstream oil
Russian Federation	RUS	6604	52.28	50.8734	0.0350349	1905.87	1.53335	0.841463	164	upstream oil
Nigeria	NGA	6003	4.27181	8.3382	0.0349653	1703.63	1.47607	0.789474	19	upstream oil
Russian Federation	RUS	6880	56.4816	56.2328	0.0349119	1856.1	1.54929	0.865385	156	upstream oil
Libya	LBY	5514	28.8524	9.91835	0.0349086	1666.89	0.859694	0.981432	377	upstream oil
Ecuador	ECU	4351	-0.734576	-76.8803	0.0348849	1836.68	2.95056	0.804348	46	upstream oil
Kazakhstan	KAZ	6723	51.353	53.2205	0.0348626	1381.19	1.6015	0.899408	169	upstream oil
Iran	IRN	7763	30.7652	49.9882	0.0347942	1741.33	1.25209	0.972393	326	upstream oil
Oman	OMN	8187	22.7816	55.8152	0.0347766	1726.97	1.33725	0.904762	336	upstream oil
Syria	SYR	7103	36.4579	41.2812	0.034746	1814.32	1.33404	0.936937	333	upstream oil
Azerbaijan	AZE	6626	40.0308	51.3492	0.0346923	1594.67	1.61812	0.976852	216	upstream oil
Malaysia	MYS	11317	6.97567	104.178	0.0346497	1501.39	1.5261	0.969231	65	upstream oil
United Kingdom	GBR	4822	60.1794	-3.86921	0.0346477	1765.74	1.25793	0.911765	68	upstream oil
Ecuador	ECU	4348	-0.373648	-76.8788	0.0345414	1889.94	2.18509	0.888889	45	upstream oil
Russian Federation	RUS	6947	55.9735	57.9577	0.0345332	1871.25	1.94692	0.825806	155	upstream oil
Venezuela	VEN	4265	9.70262	-63.4617	0.0345133	1908.46	2.12059	0.972414	145	upstream oil
Venezuela	VEN	4180	9.62445	-63.6438	0.0344848	1987.68	3.37424	0.753623	138	upstream oil
United States	USA	1042	47.8755	-102.469	0.0344698	1940.62	1.61389	0.845494	233	upstream oil
Saudi Arabia	SAU	8135	22.5242	54.0505	0.0344678	1856.92	1.54357	0.976401	339	upstream oil
Russian Federation	RUS	8759	61.4878	75.4743	0.0343779	1877.81	1.6015	0.562874	167	upstream oil
Russian Federation	RUS	9172	62.3833	80.1802	0.0342232	1737.53	1.33921	0.72043	93	upstream oil
Malaysia	MYS	11337	5.44806	105.38	0.0342039	1737.54	2.36494	0.603774	53	upstream oil
Libya	LBY	5603	28.2849	19.9235	0.0341085	1696.58	1.84905	0.814016	371	upstream oil
Russian Federation	RUS	6279	67.9341	55.9719	0.0341058	1842.22	1.83281	0.679688	128	upstream oil
Qatar	QAT	7900	25.2676	50.8084	0.0340959	1819.69	3.91699	0.951567	351	upstream oil
Yemen	YEM	8258	15.3328	46.846	0.0340909	1743.13	1.48832	0.945513	312	upstream oil
United Arab Emirates	ARE	8107	23.8325	53.6269	0.0339356	1776.46	1.57469	0.965015	343	upstream oil
Equatorial Guinea	GNQ	6059	1.49545	9.40383	0.0339106	1764.3	1.6015	1	12	upstream oil
Russian Federation	RUS	11712	63.8687	122.704	0.0338631	1803.83	1.67291	0.819923	261	upstream gas
Uzbekistan	UZB	9682	38.6236	66.0668	0.0337756	1793.72	1.15159	0.965517	319	upstream oil
Kuwait	KWT	7410	29.8838	47.7901	0.0337557	1763.81	2.54174	0.845481	343	upstream oil
Iran	IRN	7809	30.6621	50.3299	0.0337521	1855.99	1.18289	0.713846	325	upstream oil
Algeria	DZA	5407	28.6105	7.51065	0.0337436	1686.84	1.16833	0.684211	361	upstream oil
Egypt	EGY	5680	31.0965	26.6196	0.0337331	1784.89	2.65636	0.891365	359	upstream oil
Argentina	ARG	4551	-38.2001	-68.7263	0.0336682	1801.56	1.96102	0.584967	306	upstream oil
Algeria	DZA	5427	28.6601	7.9127	0.0336497	1747.3	1.67287	0.955923	363	upstream oil
United Arab Emirates	ARE	8112	23.8386	53.664	0.0335531	1817.15	2.61403	0.968571	350	upstream oil
Ecuador	ECU	4328	-0.265784	-76.9992	0.0335329	1821.05	2.12561	0.883721	43	upstream oil
Democratic Republic of the Congo	COD	6179	-5.83132	12.2063	0.0334392	1689.51	1.50062	0.885714	35	upstream oil
India	IND	9892	18.7059	72.3431	0.0334342	1654.24	1.48047	0.981982	222	upstream oil
Australia	AUS	12030	-24.0017	131.555	0.0334207	1673.59	1.10574	0.923077	260	upstream oil
Iran	IRN	7746	30.3631	49.8798	0.033392	1834.2	1.09439	0.448916	323	upstream oil
Congo	COG	6165	-4.89221	12.0815	0.033355	1677.9	1.6015	0.709091	55	upstream oil
Malaysia	MYS	11327	5.37172	104.897	0.033249	1641.86	2.42079	0.941176	51	upstream oil
Russian Federation	RUS	9011	66.2106	77.2247	0.0332455	1682.49	2.14527	0.555556	108	upstream gas
Iran	IRN	7261	32.9831	46.1702	0.0332408	1753.46	1.45747	0.773006	326	upstream oil
Algeria	DZA	5349	31.7607	5.98577	0.0332188	1639.62	1.6015	0.118457	363	upstream oil
Russian Federation	RUS	8675	62.5317	73.8954	0.0332147	1846.49	4.29801	0.515464	194	upstream oil
Saudi Arabia	SAU	7454	24.0008	48.0881	0.0330958	1736.38	1.70573	0.631579	323	upstream oil
United Arab Emirates	ARE	8142	23.3119	54.1794	0.0330295	1685.58	1.53459	0.98827	341	upstream oil
Indonesia	IDN	11458	0.846148	101.392	0.0329904	1802.29	1.66782	0.875	24	upstream oil
Russian Federation	RUS	6485	50.9102	44.5331	0.0329464	1824.59	1.3959	0.892473	186	upstream oil
Iran	IRN	7798	30.3433	50.2301	0.0329132	1788.18	1.07689	0.978125	320	upstream oil
Nigeria	NGA	5832	5.66687	6.39365	0.03289	1644.35	1.65807	0.836066	61	upstream oil
Oman	OMN	8309	19.2658	56.1784	0.0327946	1634.88	1.14134	0.970674	341	upstream oil
Brazil	BRA	4750	-24.6893	-42.506	0.0327759	1683.79	1.05308	0.96129	155	upstream oil
Gabon	GAB	6045	-1.50881	8.82652	0.0327653	1775.45	1.11408	0.804348	46	upstream oil
Russian Federation	RUS	8622	60.063	72.7645	0.0327491	1857.67	1.59621	0.876404	178	upstream oil
Mexico	MEX	3599	17.9458	-94.2869	0.032745	1778.11	1.67971	0.790323	186	upstream oil
United Kingdom	GBR	5029	56.399	2.06238	0.0327224	1782.97	1.50764	0.827338	139	upstream oil
Iran	IRN	7907	30.2491	50.8536	0.0326799	1816.2	1.49053	0.667742	310	upstream oil
Vietnam	VNM	11366	9.83133	108.017	0.0326508	1819.2	4.65389	0.666667	69	upstream oil
Iraq	IRQ	7289	31.9434	47.2818	0.0325355	1693.72	1.11708	0.479532	342	upstream oil
Russian Federation	RUS	9082	64.3497	77.8268	0.032492	1717.51	1.65487	0.783133	166	upstream oil
Gabon	GAB	6043	-1.57994	8.79651	0.032399	1717.43	2.00242	0.666667	45	upstream oil
Russian Federation	RUS	8520	61.0977	70.1915	0.0323394	1767.24	2.366	0.812903	155	upstream oil
Iran	IRN	7724	30.8348	49.761	0.0323314	1761.84	1.21917	0.9625	320	upstream oil
Indonesia	IDN	12003	-1.3817	122.481	0.0322951	1720.44	1.58187	0.75	8	upstream oil
Russian Federation	RUS	9188	62.4644	80.3519	0.0322874	1835.89	1.65879	0.876923	130	upstream oil
United Arab Emirates	ARE	8138	24.2127	54.1426	0.0322137	1745.45	1.6015	0.221264	348	upstream oil
China	CHN	9473	40.7954	83.6771	0.0321929	1743.15	1.60212	0.706897	290	upstream oil
Ecuador	ECU	4350	-0.438903	-76.8798	0.0321242	1872.64	2.54826	0.826087	46	upstream oil
Russian Federation	RUS	8588	60.4665	72.2055	0.0320855	1655.69	0.855477	0.454545	220	upstream oil
Timor-Leste	TLS	12006	-11.0657	126.613	0.0320673	1845.45	1.09531	0.916667	120	upstream oil
China	CHN	11228	38.2351	119.15	0.0320614	1806.13	1.58325	0.930876	217	upstream oil
Egypt	EGY	7025	28.1166	33.2866	0.0320458	1804.6	1.56387	0.967391	368	upstream oil
Indonesia	IDN	11612	-7.18408	111.692	0.0320403	1791.5	2.34101	0.704545	44	upstream oil
Uzbekistan	UZB	9666	38.4546	65.8049	0.0320274	1647.33	1.21754	0.930599	317	upstream oil
Russian Federation	RUS	6794	51.9875	54.0754	0.0320103	1672.61	1.6015	0.821839	174	upstream oil
Russian Federation	RUS	8636	61.1595	72.9963	0.0320009	1815.07	1.63425	0.888889	189	upstream oil
Turkmenistan	TKM	9631	38.9408	64.1357	0.031998	1778.63	1.43098	0.904762	336	upstream oil
Argentina	ARG	4552	-38.2926	-68.7177	0.0319041	1781.27	1.39815	0.493789	322	upstream oil
Iran	IRN	8084	25.9852	53.1613	0.0319038	1613.03	1.21937	0.993846	325	upstream oil
China	CHN	11405	19.437	112.109	0.0318703	1747.2	1.47651	0.72043	93	upstream oil
Malaysia	MYS	11628	3.6273	112.678	0.0317799	1777.82	4.38163	0.944444	18	upstream oil
Gabon	GAB	6085	-1.08919	10.2464	0.0317115	1768.71	3.19558	0.757576	33	upstream oil
Ecuador	ECU	4374	-0.258012	-76.8315	0.0316399	1937.1	2.3558	0.97619	42	upstream oil
Yemen	YEM	8243	15.8191	45.8344	0.0315859	1661.26	1.13719	0.928994	338	upstream oil
Nigeria	NGA	5782	5.86058	5.13314	0.0315847	1774.2	1.6015	0.423913	92	upstream oil
Russian Federation	RUS	8581	60.433	72.0414	0.0315198	1825.14	1.41326	0.907216	194	upstream oil
Angola	AGO	6101	-6.35062	11.1523	0.0314764	1639.11	1.57416	0.640449	89	upstream oil
Iraq	IRQ	7208	35.5829	44.2506	0.0314585	1818.8	1.16951	0.916933	313	upstream oil
Denmark	DNK	5080	55.5786	4.76004	0.0314312	1795.02	1.50072	0.930556	144	upstream oil
Democratic Republic of the Congo	COD	6181	-5.94325	12.2619	0.0313657	1832.67	1.74937	0.883721	43	upstream oil
United States	USA	3512	27.3013	-90.1344	0.0313446	1765.77	4.63694	0.805195	231	upstream oil
Egypt	EGY	7007	28.7295	32.8209	0.0313164	1847.67	1.20511	0.936963	349	upstream oil
Russian Federation	RUS	6296	67.18	56.6157	0.0311993	1923.56	1.6015	0.608333	120	upstream oil
Iraq	IRQ	7396	30.4764	47.7418	0.0311955	1690.21	0.377634	0.937304	319	upstream oil
Malaysia	MYS	11643	4.55046	113.624	0.0311324	1763.21	1.6015	0.666667	15	upstream oil
Venezuela	VEN	4280	8.68993	-63.2306	0.0311057	1875.6	1.97794	0.827586	145	upstream oil
Mexico	MEX	3658	17.8979	-93.1691	0.0310267	1525.3	1.6015	0.779528	127	upstream oil
United States	USA	516	48.0168	-103.879	0.0309979	1924.76	1.95685	0.636735	245	upstream oil
Iraq	IRQ	7343	31.6725	47.518	0.0309081	1768.4	1.07706	0.971338	314	upstream oil
Algeria	DZA	5460	28.1534	8.96799	0.0308265	1677.39	0.851369	0.981283	374	upstream oil
Iraq	IRQ	7220	35.2543	44.4221	0.0308245	1744.16	1.89518	0.934911	338	upstream oil
Egypt	EGY	5747	29.6004	28.6199	0.0308124	1851.73	1.38587	0.937008	381	upstream oil
Indonesia	IDN	11669	-0.583616	117.385	0.0308013	1760.93	1	0.964286	28	upstream oil
Ecuador	ECU	4342	-0.707133	-76.8856	0.0307998	1929.73	1.64475	0.788462	52	upstream oil
Qatar	QAT	7973	26.6702	52.0138	0.0306478	1719.99	1.50096	0.870432	301	upstream oil
Iraq	IRQ	7335	32.3478	47.4592	0.0306187	1609.5	0.786072	0.973214	336	upstream oil
Russian Federation	RUS	8487	59.873	68.8846	0.0305902	1759.72	1.6015	0.215909	176	upstream oil
Iraq	IRQ	7209	32.2282	44.2527	0.0305899	1726.95	1.59403	0.905444	349	upstream oil
Mexico	MEX	3649	17.8173	-93.2905	0.0305709	1962.32	1.59796	0.731429	175	upstream oil
Malaysia	MYS	11625	3.88425	112.455	0.03056	1714.21	1.74094	0.904762	21	upstream oil
Malaysia	MYS	11313	5.7352	103.649	0.0305221	1662.59	1.48573	0.857143	56	upstream oil
Gabon	GAB	6080	-1.73587	9.96645	0.0304479	1723.25	3.54022	0.818182	44	upstream oil
Australia	AUS	11693	-19.9285	115.383	0.0303349	1750.41	2.08642	0.890196	255	upstream oil
Syria	SYR	7126	36.9611	42.0525	0.0303152	1738.63	2.40328	0.767442	301	upstream oil
United States	USA	2660	32.4237	-101.317	0.0302497	1850.77	1.26642	0.832817	323	upstream oil
United States	USA	1056	47.9779	-102.418	0.0302406	1926.03	1.56498	0.692708	192	upstream oil
Iraq	IRQ	7354	30.5702	47.5603	0.0301843	1778.2	0.818935	0.749206	315	upstream oil
Russian Federation	RUS	8620	60.779	72.708	0.0301626	1699.7	1.43331	0.88172	186	upstream oil
Libya	LBY	5586	29.5709	19.6234	0.0301605	1788.25	1.11045	0.925258	388	upstream oil
Gabon	GAB	6057	-1.79402	9.30265	0.030154	1770.36	2.17912	0.666667	63	upstream oil
Yemen	YEM	8240	15.5677	45.7968	0.0301402	1770.1	1.65675	0.946372	317	upstream oil
Libya	LBY	5634	28.9257	21.506	0.0301083	1640.6	1.16798	0.797368	380	upstream oil
Libya	LBY	5640	28.3721	21.9408	0.0300727	1665.43	0.982458	0.927027	370	upstream oil
Mexico	MEX	3648	17.5952	-93.2951	0.0300566	1792.06	1.28046	0.779221	154	upstream oil
Cuba	CUB	3957	23.1495	-81.8809	0.0300278	1869.59	1.43007	0.868526	251	upstream oil
Sudan	SDN	8227	16.126	32.685	0.0299891	1756.8	2.58654	0.868613	274	upstream oil
Ecuador	ECU	4379	-0.388203	-76.8131	0.0299829	1928.08	2.17931	0.8	50	upstream oil
Ecuador	ECU	4371	-0.412841	-76.8446	0.0299738	1885.23	2.07102	0.788462	52	upstream oil
Russian Federation	RUS	8769	64.8705	75.4978	0.0299594	1806.72	1.6015	0.479592	98	upstream oil
Nigeria	NGA	6002	4.35392	8.24603	0.0299119	1672.77	1.6015	0.789474	19	upstream oil
Indonesia	IDN	11490	-1.20321	103.382	0.0298772	1680.62	0.832916	0.916667	24	upstream oil
Malaysia	MYS	11649	4.70018	113.941	0.0298426	1710.53	2.9112	0.7	10	upstream oil
Uzbekistan	UZB	9672	38.68	65.9575	0.0298312	1746.5	1.56131	0.946844	301	upstream oil
United Kingdom	GBR	5025	57.0104	1.83748	0.0297801	1802.29	1.95312	0.897436	117	upstream oil
Russian Federation	RUS	8425	61.4864	66.2932	0.0296788	1827.67	1.54706	0.884615	182	upstream oil
Russian Federation	RUS	8429	61.7975	66.5558	0.0296559	1760.89	1.78577	0.812121	165	upstream oil
Angola	AGO	6193	-7.17373	12.3877	0.0296321	1559.59	1.3931	0.854839	62	upstream oil
Gabon	GAB	6029	-0.890015	8.65899	0.0296225	1713.6	1.76451	0.62	50	upstream oil
Indonesia	IDN	11459	0.777061	101.429	0.0296207	1722.11	1.86404	0.884615	26	upstream oil
Russian Federation	RUS	8738	61.675	75.1878	0.0295899	1804.66	1.6015	0.323009	226	upstream oil
Russian Federation	RUS	8884	61.5138	76.506	0.0295814	1897.57	1.63142	0.89172	157	upstream oil
Brazil	BRA	4734	-25.2043	-42.8787	0.029557	1770.32	1.62948	0.923567	157	upstream oil
Iran	IRN	7464	31.0022	48.1192	0.0295221	1847.12	1.6015	0.777419	310	upstream oil
Venezuela	VEN	4240	9.67308	-63.5209	0.0295109	1986.67	3.35441	0.887417	151	upstream oil
Colombia	COL	4069	6.93457	-71.1628	0.0295068	1843.43	2.32307	0.883117	77	upstream oil
Ecuador	ECU	4336	-0.487072	-76.9032	0.0294957	1868.51	1.80798	0.916667	36	upstream oil
Russian Federation	RUS	9171	62.3839	80.1669	0.0294877	1773.45	2.22883	0.606383	94	upstream oil
Russian Federation	RUS	8663	60.3566	73.6839	0.0294525	1799.06	1.42305	0.822222	90	upstream oil
Russian Federation	RUS	10228	60.1439	109.12	0.0294405	1581.72	2.57896	0.758333	120	upstream oil
Mexico	MEX	3710	19.2633	-92.2095	0.0294331	1771.81	1.67407	0.879518	166	upstream oil
Algeria	DZA	5476	27.7026	9.1745	0.0294317	1641.58	0.931417	0.975936	374	upstream oil
Russian Federation	RUS	6288	65.1606	56.5072	0.0294167	1815.89	1.78577	0.805031	159	upstream oil
Angola	AGO	6154	-5.42615	12.0017	0.0294029	1789.04	2.33911	0.759259	54	upstream oil
Russian Federation	RUS	6515	50.7481	45.4509	0.0293976	1601.38	0.417383	0.820513	195	upstream oil
Angola	AGO	6089	-6.24258	10.7312	0.0293188	1680.92	1.49977	0.895833	96	upstream oil
Gabon	GAB	6091	-4.24467	10.818	0.0293143	1550.97	1.53665	0.890909	55	upstream oil
India	IND	9950	10.8132	79.3073	0.0293097	1809.15	1.41929	0.898551	138	upstream oil
Russian Federation	RUS	6603	52.9066	50.8598	0.0293089	1858.69	2.53349	0.721591	176	upstream oil
Angola	AGO	6106	-7.23658	11.2857	0.0293003	1655.12	1.96113	0.860465	86	upstream oil
Malaysia	MYS	11319	5.28301	104.383	0.0292736	1684.78	2.2911	1	47	upstream oil
Algeria	DZA	5411	28.4589	7.518	0.0292329	1684.18	0.938639	0.875706	354	upstream oil
United Kingdom	GBR	4922	58.3524	0.863005	0.0292297	1737.47	2.13239	0.515873	126	upstream oil
Ecuador	ECU	4355	-0.4046	-76.8718	0.0292268	1890.42	1.76759	0.897959	49	upstream oil
Mexico	MEX	3606	18.0415	-94.0494	0.0292192	1878.79	3.41095	0.714286	175	upstream oil
United Arab Emirates	ARE	8147	23.2774	54.229	0.0292083	1745.03	1.58433	0.97619	336	upstream oil
Russian Federation	RUS	8398	67.6601	60.5098	0.0291774	1824.57	2.00578	0.547945	73	upstream oil
Mexico	MEX	2967	26.018	-98.4855	0.0291756	1738.9	1.31446	0.769737	304	upstream oil
Iran	IRN	7417	31.1414	47.8721	0.0291041	1737.01	1.09143	0.728125	320	upstream oil
Iraq	IRQ	7404	30.568	47.7676	0.0290978	1634.4	0.684499	0.680251	319	upstream oil
Saudi-Kuwaiti Neutral Zone	SAUKWTNZ	7382	28.8104	47.7034	0.0290224	1870.38	1.59324	0.774194	341	upstream oil
Syria	SYR	7107	36.9971	41.5637	0.0290219	1664.29	1.211	0.950166	301	upstream oil
Libya	LBY	5518	28.8654	9.93515	0.0289779	1731.81	1	0.963061	379	upstream oil
Uzbekistan	UZB	9665	38.4653	65.781	0.028947	1375.36	2.95504	0.583587	329	upstream oil
Russian Federation	RUS	6324	66.7278	56.9792	0.0288748	1844.99	2.2714	0.697183	142	upstream oil
Algeria	DZA	5382	30.4073	6.54321	0.0288521	1796.1	2.37952	0.980556	360	upstream oil
Egypt	EGY	5679	31.0907	26.6129	0.0288441	1844.03	3.61772	0.886427	361	upstream oil
United States	USA	1013	47.5583	-102.54	0.0288291	1881.02	1.88402	0.81746	252	upstream oil
Malaysia	MYS	11335	5.43388	105.218	0.0288112	1700.63	2.09983	0.827586	58	upstream oil
Ecuador	ECU	4397	-0.058806	-76.6514	0.0287997	1836.74	2.9944	0.897436	39	upstream oil
Russian Federation	RUS	6686	53.0395	52.4125	0.0287163	1680.04	0.835669	0.794118	136	upstream oil
Egypt	EGY	6983	31.4143	31.3638	0.02871	1770.06	1.20213	0.951429	350	upstream oil
Indonesia	IDN	11588	-5.91533	107.731	0.0286573	1717.91	1.71096	1	23	upstream oil
Russian Federation	RUS	10346	57.3552	107.006	0.0286267	1777.61	1.6015	0.204301	186	upstream oil
Algeria	DZA	5370	31.7549	6.14296	0.0286172	1790.44	1.6015	0.926829	369	upstream oil
Russian Federation	RUS	6502	45.0088	45.1276	0.0285879	1776.63	1.51131	0.683128	243	upstream oil
Gabon	GAB	6084	-2.77836	10.0149	0.0285602	1762.32	3.07629	0.522727	44	upstream oil
Iraq	IRQ	7326	32.1187	47.4267	0.0285064	1502.85	1.6015	0.808917	314	upstream oil
Russian Federation	RUS	8765	64.8714	75.4821	0.0284883	1724.67	1.6015	0.514563	103	upstream oil
Brazil	BRA	4754	-24.6369	-42.4118	0.0284325	1695.84	1.45423	0.853659	164	upstream oil
Russian Federation	RUS	6562	52.8456	49.5756	0.0284168	1831.33	1.26374	0.9	170	upstream oil
Argentina	ARG	4565	-38.2377	-68.6679	0.0283706	1657.79	0.964085	0.664516	310	upstream oil
Nigeria	NGA	5797	5.68796	5.37717	0.0283428	1658.01	2.79297	0.710843	83	upstream oil
Russian Federation	RUS	10321	55.3667	105.852	0.0283131	1399.94	0.588162	0.308081	198	upstream gas
Kuwait	KWT	7392	29.8769	47.7264	0.0282854	1684.21	2.71559	0.380665	331	upstream oil
Tunisia	TUN	5482	31.7032	9.24387	0.0282739	1659.21	1.13222	0.976676	343	upstream oil
United States	USA	25	70.2531	-148.436	0.0282632	1857.89	1.6015	0.85022	227	upstream oil
Russian Federation	RUS	10323	55.3206	105.944	0.0281928	1351.04	0.543205	0.378109	201	upstream gas
Nigeria	NGA	5801	6.06526	5.43766	0.0281872	1598.91	1.47337	0.521277	94	upstream oil
Russian Federation	RUS	6613	52.1727	51.1236	0.0281265	1745.17	0.745472	0.85	160	upstream oil
Mexico	MEX	3582	18.5075	-96.1313	0.0280044	1722.2	1.6015	0.82659	173	upstream oil
Brazil	BRA	4759	-23.1352	-41.0741	0.0279729	1768.48	2.30138	0.640244	164	upstream oil
Malaysia	MYS	11439	6.78158	116.229	0.0279651	1713.61	2.14423	0.945946	37	upstream oil
India	IND	10455	27.3769	95.0885	0.0279621	1865.5	1.30188	0.925	160	upstream oil
Azerbaijan	AZE	6621	40.0837	51.2375	0.0279538	1784.5	1.15072	0.962617	214	upstream oil
United States	USA	934	47.8426	-102.698	0.0279464	1879.39	1.63247	0.812766	235	upstream oil
Saudi Arabia	SAU	7595	24.0427	49.1985	0.0279454	1728.53	2.35428	0.947368	361	upstream oil
Argentina	ARG	4560	-38.3503	-68.6861	0.0278597	1787.37	1.49053	0.477848	316	upstream oil
Uzbekistan	UZB	9640	38.7981	64.6469	0.027858	1735.78	1.62798	0.893678	348	upstream oil
Libya	LBY	5546	33.8492	12.0318	0.0278316	1742.66	1.40183	0.89527	296	upstream oil
Egypt	EGY	5741	29.856	28.5258	0.0277587	1745.39	1.10707	0.873995	373	upstream oil
Kazakhstan	KAZ	6729	45.896	53.2984	0.0277536	1812.45	1.42434	0.758621	290	upstream oil
Saudi Arabia	SAU	7654	25.4386	49.3616	0.0277021	1815.37	1.45231	0.873529	340	upstream oil
Iraq	IRQ	7146	37.1364	42.7934	0.0276953	1783.96	1.71891	0.941176	306	upstream oil
Nigeria	NGA	5869	5.50378	6.83196	0.0276807	1843.59	1.762	0.783133	83	upstream oil
Russian Federation	RUS	6579	52.4591	50.1761	0.0276655	1802.37	1.74522	0.853503	157	upstream oil
Angola	AGO	6170	-7.59028	12.1113	0.0276618	1624.5	0.99324	0.777778	72	upstream oil
Libya	LBY	5641	28.8353	22.1071	0.0276562	1729.72	2.2164	0.596154	364	upstream oil
United Kingdom	GBR	4927	61.1007	1.07227	0.0276558	1764.38	1.81222	0.818182	77	upstream oil
Russian Federation	RUS	9004	60.753	77.175	0.027645	1754.82	1.51353	0.8	115	upstream oil
Ecuador	ECU	4370	-0.394014	-76.8474	0.0276448	1919.88	1.73116	0.846154	52	upstream oil
Nigeria	NGA	5986	3.954	7.77485	0.0276351	1774.02	1.65944	0.966667	30	upstream oil
Trinidad and Tobago	TTO	4300	10.414	-61.4817	0.0276339	1220.9	2.23038	0.845679	162	upstream oil
Pakistan	PAK	9723	25.7944	68.6988	0.027628	1713.4	1.39132	0.927928	333	upstream oil
Iran	IRN	7843	30.4137	50.5386	0.0276186	1841.27	1.22166	0.672727	330	upstream oil
Russian Federation	RUS	6629	51.9011	51.374	0.0275499	1815.31	1.8811	0.563953	172	upstream oil
Vietnam	VNM	11386	8.48812	108.677	0.027538	1742.06	1.8741	0.948276	58	upstream oil
Canada	CAN	294	53.1784	-115.75	0.0275295	1815.09	3.35613	0.867647	204	upstream oil
Iran	IRN	7909	29.917	50.8786	0.0275226	1749.88	1.49592	0.310127	316	upstream oil
Venezuela	VEN	4167	9.65418	-63.6505	0.0275182	1957.24	1.6015	0.882353	119	upstream oil
Congo	COG	6103	-4.48085	11.2566	0.0274765	1586.7	1.5359	0.938776	49	upstream oil
Russian Federation	RUS	9224	66.9409	80.7477	0.027464	1481.24	1.00872	0.553333	150	upstream gas
Iran	IRN	7862	30.375	50.5923	0.027402	1813.97	1.5156	0.611987	317	upstream oil
Venezuela	VEN	4272	9.83318	-63.3409	0.0273934	1828.2	2.01802	0.659091	176	upstream oil
Angola	AGO	6113	-7.36486	11.3751	0.0273477	1611.14	2.07031	0.807692	78	upstream oil
Qatar	QAT	7995	26.1052	52.1435	0.0272944	1752.59	1.39807	0.0987654	324	upstream oil
Indonesia	IDN	11664	-0.846418	117.268	0.0272689	1785.54	4.33253	0.823529	17	upstream oil
Libya	LBY	5645	27.5731	22.3411	0.0270476	1687.68	1.12754	0.848958	384	upstream oil
Kazakhstan	KAZ	6747	46.1784	53.3997	0.0270184	1769.84	1.21355	0.878229	271	upstream oil
Iran	IRN	7250	33.7149	45.9003	0.0270009	1798.89	2.14267	0.851744	344	upstream oil
Russian Federation	RUS	8807	61.8818	75.7271	0.0269749	1826.97	1.6015	0.361446	166	upstream oil
Russian Federation	RUS	6849	56.4022	55.5541	0.0269316	1820.56	1.80315	0.846154	130	upstream oil
Tunisia	TUN	5523	31.3992	10.022	0.0269147	1754.44	1.41074	0.941489	376	upstream oil
Congo	COG	6115	-5.28338	11.3849	0.0269105	1692.79	2.77978	0.179487	78	upstream oil
Oman	OMN	8286	18.3263	55.6809	0.0269009	1791.72	0.912439	0.924471	331	upstream oil
United Arab Emirates	ARE	8096	23.545	53.3241	0.0268669	1779.55	1.33001	0.942149	363	upstream oil
Nigeria	NGA	5929	4.52655	6.63257	0.0267735	1650.39	2.4297	0.308824	68	upstream oil
Libya	LBY	5661	28.7575	22.7966	0.0267672	1874.31	1.17014	0.675393	382	upstream oil
Iraq	IRQ	7171	36.2034	43.7199	0.0267469	1911.95	1.69579	0.9	320	upstream oil
United States	USA	702	47.7114	-103.04	0.0267041	1888.87	1.2861	0.715909	264	upstream oil
United States	USA	1894	32.6917	-103.285	0.0266861	1935.17	3.87665	0.642424	330	upstream oil
Algeria	DZA	5442	31.0804	8.56036	0.0266667	1720.34	1.16222	0.790576	382	upstream oil
Russian Federation	RUS	8717	61.9783	74.7457	0.0266512	1855.71	1.97831	0.672515	171	upstream oil
Mexico	MEX	3551	20.4612	-97.5454	0.0266149	1759.86	2.25652	0.674033	181	upstream oil
Iraq	IRQ	7194	34.8635	44.0227	0.0265948	1640.38	1.02044	0.401198	334	upstream oil
Gabon	GAB	6039	-0.752702	8.75507	0.0265944	1690.6	1.53223	0.567568	37	upstream oil
Malaysia	MYS	11322	6.55088	104.558	0.0265846	1733.57	1.64701	0.887324	71	upstream oil
Russian Federation	RUS	8805	61.5777	75.7175	0.0265844	1779.01	3.61331	0.614679	218	upstream oil
Colombia	COL	4067	6.73756	-71.3244	0.0265767	1797.08	1.20278	0.868421	76	upstream oil
Turkmenistan	TKM	8071	39.4617	52.7951	0.0265636	1838.31	1.89177	0.827004	237	upstream oil
Mexico	MEX	3679	18.0672	-93.0932	0.0265426	1757.61	1.6015	0.686813	182	upstream oil
Argentina	ARG	4567	-38.2862	-68.6358	0.0265404	1783.46	1.58357	0.713376	314	upstream oil
Russian Federation	RUS	10172	58.0623	107.11	0.0265319	1522.9	0.446728	0.550898	167	upstream oil
China	CHN	11396	21.0472	109.084	0.0264836	1890.19	1.86662	0.715686	102	upstream oil
Russian Federation	RUS	6788	51.9804	54.0141	0.026364	1843.06	1.37909	0.892216	167	upstream oil
Algeria	DZA	5434	30.6114	8.2626	0.0262618	1678.15	1.54677	0.693122	378	upstream oil
Mexico	MEX	3632	18.0064	-93.4508	0.0262367	1798.92	1.5177	0.836478	159	upstream oil
Iran	IRN	8045	27.5481	52.5601	0.0262336	1504.87	1.73815	0.97026	269	upstream oil
Egypt	EGY	5711	30.8122	27.3145	0.0262313	1765.21	1.13282	0.567039	358	upstream oil
Oman	OMN	8207	22.6711	56.2468	0.0262231	1738.9	1.30707	0.895833	336	upstream oil
Chad	TCD	5878	9.0396	16.3726	0.0262064	1790.52	1.19343	1	147	upstream oil
Iran	IRN	7826	30.1394	50.4411	0.0261976	1813.63	1.64768	0.677215	316	upstream oil
Iraq	IRQ	7158	34.9104	43.4321	0.0261284	1761.96	1.35094	0.879257	323	upstream oil
Indonesia	IDN	11585	-6.28049	107.354	0.0261103	1895.43	1.91446	0.875	24	upstream oil
United States	USA	3088	28.9381	-97.8843	0.0260876	1908.96	2.33901	0.687943	282	upstream oil
Venezuela	VEN	4114	9.47247	-64.3901	0.0260683	1684.81	2.78778	0.35	160	upstream oil
Russian Federation	RUS	8651	62.5959	73.5157	0.0260581	1780.01	2.84504	0.368421	190	upstream oil
Russian Federation	RUS	10108	57.829	105.81	0.0260425	1588.46	0.325902	0.315789	171	upstream oil
Qatar	QAT	7893	25.449	50.7872	0.0260308	1894.82	1.6015	0.727536	345	upstream oil
Russian Federation	RUS	6773	52.3997	53.7209	0.0259932	1770.66	1.18656	0.83125	160	upstream oil
Egypt	EGY	7014	28.8503	33.071	0.0259884	1728.11	1.62379	0.576471	340	upstream oil
Egypt	EGY	5707	30.91	27.2169	0.0259853	1711.48	1.1482	0.803419	351	upstream oil
Algeria	DZA	5380	30.475	6.47366	0.0259705	1785.68	1.98503	0.929155	367	upstream oil
Russian Federation	RUS	9040	62.302	77.3896	0.0259685	1760.2	1.87757	0.759124	137	upstream oil
Russian Federation	RUS	6698	53.5398	52.7751	0.0259651	1946.76	1.56099	0.828125	128	upstream oil
Venezuela	VEN	4243	9.65164	-63.511	0.0259202	1782.34	1.6015	0.867647	136	upstream oil
Argentina	ARG	4549	-38.3313	-68.7388	0.0259068	1784.86	2.01693	0.268139	317	upstream oil
Oman	OMN	8299	22.0818	55.9787	0.0258576	1621.01	1.9606	0.799392	329	upstream oil
Russian Federation	RUS	8925	58.8922	76.8363	0.0258339	1766.88	1.74429	0.866667	195	upstream oil
Australia	AUS	12021	-13.9384	123.297	0.0257793	1649.92	2.56967	0.508108	185	upstream oil
Russian Federation	RUS	9000	66.475	77.1724	0.0257694	1716.39	2.00549	0.715686	102	upstream gas
China	CHN	9470	40.6815	83.6257	0.0257666	1811.58	1.35017	0.807018	285	upstream oil
Nigeria	NGA	5823	5.88288	6.21807	0.0257654	1810.66	2.78964	0.829545	88	upstream oil
China	CHN	11246	38.1407	119.528	0.0256878	1823.85	1.60229	0.953782	238	upstream oil
Russian Federation	RUS	10264	60.9153	112.155	0.0256576	1693.52	1.58457	0.473958	192	upstream oil
Tunisia	TUN	5537	32.2892	10.975	0.0256486	1819	1.1826	0.925134	374	upstream oil
Libya	LBY	5572	28.1289	18.7907	0.0256136	1744.61	1.68845	0.443243	370	upstream oil
Gabon	GAB	6053	-2.22283	9.1775	0.0256069	1856.12	1.58898	0.77551	49	upstream oil
Australia	AUS	11686	-21.4339	114.067	0.0255177	1756.87	1.55575	0.513308	263	upstream oil
Mexico	MEX	3719	19.4478	-92.0868	0.0255069	1713.78	2.19259	0.448864	176	upstream oil
Saudi Arabia	SAU	8125	22.5398	53.9232	0.0254804	1727.94	1.43939	0.96793	343	upstream oil
Kazakhstan	KAZ	9291	46.4264	64.6836	0.025435	1731.45	1.39135	0.615385	338	upstream oil
Libya	LBY	5660	28.8394	22.645	0.025401	1776.52	1.27871	0.69437	373	upstream oil
Russian Federation	RUS	10068	60.7718	97.127	0.0253974	1593.7	0.888716	0.779487	195	upstream oil
Ecuador	ECU	4376	-0.35482	-76.8298	0.0253924	1918.23	1.47741	0.816327	49	upstream oil
Russian Federation	RUS	8452	61.9201	67.675	0.0253661	1887.06	2.50878	0.837696	191	upstream oil
Vietnam	VNM	11361	9.7331	107.969	0.0253623	1904.78	2.63896	0.838235	68	upstream oil
Iran	IRN	7802	29.8282	50.2712	0.0253613	1792.69	1.75832	0.926518	313	upstream oil
China	CHN	9449	40.3863	83.4377	0.0252855	1797.13	1.39689	0.735178	253	upstream oil
United States	USA	571	47.9351	-103.456	0.0252685	1900.07	1.79414	0.607595	237	upstream oil
Mexico	MEX	3651	17.9435	-93.2805	0.0252506	1939.79	1.63272	0.456044	182	upstream oil
Russian Federation	RUS	9015	66.7919	77.2559	0.0252295	1658.65	1.6015	0.0804196	286	upstream gas
Nigeria	NGA	5834	5.82322	6.4421	0.0251902	1464.86	0.388538	0.753247	77	upstream gas
Egypt	EGY	5766	30.0258	29.9346	0.0251686	1690.74	0.720753	0.956873	371	upstream oil
Brazil	BRA	4785	-21.2157	-39.9975	0.0251642	1799.39	1.81371	0.777778	153	upstream oil
Oman	OMN	8354	21.9374	57.0741	0.0251376	1766.19	1.12183	0.985163	337	upstream oil
Syria	SYR	7100	36.1229	41.0456	0.0251168	1843.93	1.71446	0.918841	345	upstream oil
Oman	OMN	8190	22.8026	55.85	0.025024	1746.1	1.26518	0.794118	340	upstream oil
Russian Federation	RUS	8485	62.3994	68.5219	0.0250231	1805.97	1.13297	0.842857	140	upstream oil
Russian Federation	RUS	10289	62.4969	113.9	0.0250213	1770.51	1.65905	0.708155	233	upstream oil
United States	USA	2343	32.2809	-101.929	0.0249964	1783.27	1.89812	0.371257	334	upstream oil
Russian Federation	RUS	10117	57.8451	105.908	0.0249801	1698.93	0.240953	0.554839	155	upstream oil
Ecuador	ECU	4394	-0.275854	-76.6603	0.0249426	1913.79	2.5365	0.666667	48	upstream oil
Iran	IRN	7530	31.2356	48.9682	0.0248976	1783.38	2.42461	0.488024	334	upstream oil
Syria	SYR	7063	34.6084	37.9019	0.0248953	1680.48	1.12704	0.901449	345	upstream oil
Nigeria	NGA	5958	4.65391	7.05954	0.0248099	1671.5	3.04485	0.825	40	upstream oil
Iran	IRN	7856	30.3886	50.5681	0.0247795	1806.59	1.4591	0.487654	324	upstream oil
Nigeria	NGA	5957	4.55184	7.04476	0.0247789	1678.31	1.82205	0.65	40	upstream oil
Oman	OMN	8291	18.435	55.7939	0.0247168	1808.1	1.47394	0.934328	335	upstream oil
Taiwan	TWN	11421	20.2484	114.899	0.0246935	1602.42	2.26955	0.861702	94	upstream oil
Russian Federation	RUS	8662	58.5791	73.6729	0.0246829	1970.94	2.07249	0.720183	218	upstream oil
United States	USA	2451	32.2217	-101.759	0.024681	1865.1	1.7606	0.432099	324	upstream oil
Algeria	DZA	5495	29.109	9.66685	0.0246337	1724.29	4.74755	0.51715	379	upstream oil
Egypt	EGY	7034	27.8929	33.5533	0.0246275	1764.56	1.03866	0.978378	370	upstream oil
Iran	IRN	7737	30.7223	49.8391	0.024612	1664.29	1.6015	0.660131	306	upstream oil
Tunisia	TUN	5541	34.2958	11.4044	0.0245874	1705.23	1.95022	0.833898	295	upstream oil
Egypt	EGY	7019	28.9637	33.1837	0.0245805	1726.09	1.20536	0.899713	349	upstream oil
Kazakhstan	KAZ	9294	46.1341	65.0124	0.0245422	1734.5	1.49406	0.797721	351	upstream oil
Oman	OMN	8323	19.3488	56.4609	0.0243841	1881.09	1.20953	0.655689	334	upstream oil
Mexico	MEX	3722	19.3816	-92.052	0.0243714	1730.77	1.97075	0.748428	159	upstream oil
Iran	IRN	7751	30.574	49.9329	0.0243036	1681.48	2.12857	0.666667	321	upstream oil
Indonesia	IDN	11599	-6.09544	108.141	0.0242642	1704.68	1.66466	0.789474	19	upstream oil
Nigeria	NGA	5842	5.80333	6.56094	0.0242165	1835.3	1.73824	0.761194	67	upstream oil
Russian Federation	RUS	8828	64.4652	75.9009	0.0241939	1661.96	1.97233	0.666667	120	upstream gas
United States	USA	2509	32.444	-101.671	0.0241668	1822.68	1.79145	0.598214	336	upstream oil
Oman	OMN	8325	22.3288	56.4706	0.024047	1760.89	3.24133	0.821727	359	upstream oil
Nigeria	NGA	5781	5.60051	5.10888	0.0240439	1619.81	1.48825	0.857143	49	upstream oil
Venezuela	VEN	4153	9.63653	-63.709	0.0240438	1998.14	1.6015	0.80292	137	upstream oil
Algeria	DZA	5409	28.4316	7.5141	0.024029	1676.57	1.10116	0.566667	360	upstream oil
Russian Federation	RUS	8888	59.2747	76.5547	0.0239906	1737.19	1.69539	0.857955	176	upstream oil
Nigeria	NGA	5898	4.80275	5.31196	0.0239887	1737.46	2.02297	0.308824	68	upstream oil
Thailand	THA	11305	8.23889	101.79	0.0239725	1928.79	2.0571	0.921875	64	upstream oil
Gabon	GAB	6058	-0.390089	9.34498	0.0239684	1779.12	1.34849	0.731707	41	upstream oil
China	CHN	11410	20.5169	113.865	0.0239584	1810.11	1.84076	0.941176	102	upstream oil
Oman	OMN	8353	22.162	57.0453	0.0239555	1825.52	0.796615	0.929204	339	upstream oil
Russian Federation	RUS	6774	52.4511	53.7473	0.0239548	1819.43	1.31913	0.821192	151	upstream oil
Equatorial Guinea	GNQ	5994	3.80048	8.07684	0.0239456	1639.36	1.90325	0.852941	34	upstream oil
Iran	IRN	8006	27.738	52.1967	0.0238649	1984.7	1.75591	0.92233	309	upstream oil
Algeria	DZA	5500	28.6214	9.78743	0.0238024	1785.93	1.97431	0.859788	378	upstream oil
Australia	AUS	11694	-20.8197	115.385	0.0237807	1771.79	1.16359	0.835616	292	upstream oil
United States	USA	1055	47.8767	-102.425	0.0237701	1928.54	1.65582	0.85	200	upstream oil
Nigeria	NGA	5817	5.54857	6.01327	0.0237463	1524.53	2.1859	0.569767	86	upstream oil
Mexico	MEX	3611	18.0983	-93.9642	0.0236551	1895.38	2.24014	0.784946	186	upstream oil
Russian Federation	RUS	9265	67.7937	83.5488	0.0236441	1864.8	2.01634	0.740741	189	upstream oil
Colombia	COL	4423	3.93102	-73.6896	0.0236387	1850.47	1.6015	0.533333	30	upstream oil
Algeria	DZA	5373	31.6863	6.18767	0.0236269	1684.9	1.8746	0.798343	362	upstream oil
Russian Federation	RUS	9238	69.6212	81.8314	0.0235901	1739.58	1.6015	0.669118	136	upstream gas
Iran	IRN	7905	29.9417	50.8397	0.0235788	1835.18	1.50846	0.2625	320	upstream oil
Iran	IRN	7835	30.5503	50.4885	0.0235776	1849.16	1.49311	0.786585	328	upstream oil
Libya	LBY	5521	28.8914	9.96622	0.0235712	1698.58	1.3981	0.807388	379	upstream oil
Malaysia	MYS	11416	5.43944	114.698	0.0235161	1700.55	1.82289	0.8	15	upstream oil
Argentina	ARG	4510	-38.2304	-69.1408	0.0235132	1745.51	1.78718	0.871622	296	upstream oil
Iran	IRN	7884	29.9802	50.7219	0.023509	1859.23	1.44973	0.471698	318	upstream oil
Saudi Arabia	SAU	7068	23.9791	38.2269	0.0235059	1718.42	0.762305	0.83526	346	upstream oil
Canada	CAN	89	56.1435	-120.666	0.0234887	1779.82	2.38852	0.854839	186	upstream oil
United States	USA	2203	31.4425	-102.19	0.0234516	1800.3	1.93098	0.376506	332	upstream oil
Argentina	ARG	4525	-38.2307	-69.024	0.0234339	1669.54	1.41753	0.889251	307	upstream oil
Iraq	IRQ	7164	36.9168	43.5691	0.0234227	1874.34	1.51472	0.714286	287	upstream oil
Russian Federation	RUS	6528	43.3104	46.07	0.0234172	1798.13	0.881534	0.836158	177	upstream oil
Egypt	EGY	5729	29.7561	28.004	0.023409	1793.26	1.19387	0.820106	378	upstream oil
Syria	SYR	7128	37.0547	42.134	0.0234083	1768.25	1.52967	0.881188	303	upstream oil
Libya	LBY	5637	29.2306	21.5517	0.0234065	1767.02	1.68996	0.810667	375	upstream oil
Iran	IRN	7555	30.459	49.0934	0.0233868	1380.53	0.980232	0.961039	308	upstream oil
China	CHN	11427	21.1397	115.316	0.0233787	1835.98	2.07302	0.868687	99	upstream oil
Algeria	DZA	5450	27.4097	8.83867	0.0233168	1723.13	1.22865	0.693548	372	upstream oil
Algeria	DZA	5298	27.7821	0.631555	0.0232967	1847.07	1.00791	0.882698	341	upstream oil
Russian Federation	RUS	10105	57.8789	105.745	0.0232851	1571.78	1.20744	0.243781	201	upstream oil
Russian Federation	RUS	10329	55.3318	106.08	0.0232279	1402.34	0.188692	0.530516	213	upstream gas
Indonesia	IDN	11592	-6.28475	107.884	0.0232042	1749.28	1.37575	0.837838	37	upstream oil
Angola	AGO	6134	-5.41719	11.6654	0.0231884	1807.36	1.96778	0.853333	75	upstream oil
Russian Federation	RUS	6306	67.1668	56.7069	0.0231501	1691.86	1.67349	0.673077	104	upstream oil
Egypt	EGY	5721	29.9793	27.7894	0.0231497	1812.01	1.36214	0.903394	383	upstream oil
Indonesia	IDN	11662	-0.964309	117.148	0.0231129	1771.27	2.33472	0.833333	18	upstream oil
Iran	IRN	7784	30.2859	50.1028	0.0230966	1774.41	2.66804	0.649231	325	upstream oil
Ecuador	ECU	4347	-0.330959	-76.8812	0.0230855	1855.43	2.37779	0.740741	54	upstream oil
United States	USA	2187	31.9908	-102.215	0.02308	1841.1	1.47079	0.319749	319	upstream oil
Turkmenistan	TKM	6951	40.2523	58.4396	0.023056	1238.77	0.771431	0.91831	355	upstream oil
Iran	IRN	7745	30.95	49.8818	0.0230326	1799.25	2.50487	0.916923	325	upstream oil
Russian Federation	RUS	8414	61.2225	65.042	0.023022	1800.63	1.85194	0.795455	176	upstream oil
Nigeria	NGA	5983	4.03493	7.68636	0.023017	1773.17	1.50428	0.931034	29	upstream oil
Algeria	DZA	5419	28.6509	7.68521	0.0230062	1786.55	1.41595	0.734973	366	upstream oil
Russian Federation	RUS	8532	60.8416	70.7918	0.0229857	1766.99	1.39427	0.733333	165	upstream oil
Russian Federation	RUS	9046	65.3087	77.4174	0.0229771	1825.59	2.70009	0.634146	123	upstream gas
India	IND	10438	26.0639	93.9299	0.0229412	1894.32	1.78591	0.802198	182	upstream oil
Saudi Arabia	SAU	7576	24.6629	49.1446	0.0229405	1723.49	1.7594	0.864162	346	upstream oil
Libya	LBY	5517	28.8653	9.92245	0.0229261	1763.28	0.891412	0.887139	381	upstream oil
Russian Federation	RUS	8596	60.952	72.4002	0.0228899	1888.64	2.3513	0.576531	196	upstream oil
Russian Federation	RUS	8608	60.4999	72.54	0.0228892	1785.03	1.69573	0.860697	201	upstream oil
Iran	IRN	7535	32.286	49.0047	0.0228846	1758.77	1.21182	0.71521	309	upstream oil
Sudan	SDN	5888	11.6013	28.2422	0.022825	1778.12	1.40643	0.738095	210	upstream oil
Iran	IRN	8043	26.3096	52.5451	0.022809	1797.44	1.58656	0.96904	323	upstream oil
India	IND	9888	18.9215	72.0415	0.0227939	1740.98	3.45513	0.913242	219	upstream oil
Russian Federation	RUS	8525	60.8384	70.3846	0.0227878	1690.98	1.6015	0.303371	178	upstream oil
Ecuador	ECU	4373	-0.201545	-76.832	0.0227807	1960.16	2.58499	0.765957	47	upstream oil
Cameroon	CMR	6019	4.31638	8.53345	0.0227421	1736.55	2.46512	0.888889	18	upstream oil
Malaysia	MYS	11332	5.64337	105.044	0.0227378	1754.61	1.24032	0.898305	59	upstream oil
Qatar	QAT	7979	26.5555	52.0449	0.0227124	1735.52	1.6015	0.0965732	321	upstream oil
Russian Federation	RUS	6312	66.7792	56.7679	0.0226973	1864.76	1.6015	0.669014	142	upstream oil
Indonesia	IDN	11575	-5.37242	106.567	0.0226618	1744.77	1.55366	0.846154	26	upstream oil
Russian Federation	RUS	9131	57.9039	79.3041	0.0226194	1768.34	2.16711	0.864583	192	upstream oil
Gabon	GAB	6030	-1.4414	8.67357	0.0226179	1758.96	2.9871	0.467742	62	upstream oil
Ecuador	ECU	4387	-0.170019	-76.7473	0.0225988	1858.06	1.6015	0.8125	48	upstream oil
Russian Federation	RUS	6506	44.7642	45.2087	0.0225915	1840.44	1.35588	0.74359	195	upstream oil
Australia	AUS	12031	-19.4496	133.854	0.0225546	1754.72	1.42491	0.589286	280	upstream oil
Nigeria	NGA	5868	5.61919	6.81477	0.0225519	1744.7	1.62643	0.449438	89	upstream oil
Iran	IRN	7996	27.7446	52.1545	0.0225517	1939.85	2.26095	0.848592	284	upstream oil
Russian Federation	RUS	8705	60.7508	74.5607	0.0225319	1758.92	1.81586	0.643617	188	upstream oil
Iran	IRN	7904	30.2035	50.8327	0.022527	1842.9	1.69324	0.490196	306	upstream oil
Russian Federation	RUS	6910	56.6016	57.0562	0.0225039	1911.87	1.84702	0.685714	175	upstream oil
Venezuela	VEN	4197	9.56432	-63.6151	0.0225011	1746.01	1.6015	0.75	156	upstream oil
Russian Federation	RUS	6311	57.6179	56.7643	0.0224733	1859.27	1.68073	0.820988	162	upstream oil
Russian Federation	RUS	6308	65.0258	56.7272	0.0224705	1911.82	2.02148	0.64497	169	upstream oil
India	IND	10440	26.0858	93.9528	0.0224197	1889.76	1.65073	0.8125	176	upstream oil
Egypt	EGY	5682	30.6186	26.7063	0.0224156	1797.87	1.22252	0.926829	369	upstream oil
Russian Federation	RUS	6547	45.001	48.4814	0.0223919	1806.65	2.25065	0.854839	186	upstream oil
Iran	IRN	7880	30.0678	50.6775	0.0223791	1812.5	1.36015	0.48125	320	upstream oil
Vietnam	VNM	11395	8.04365	108.928	0.0223646	1555.91	1.87591	0.98	50	upstream oil
Iraq	IRQ	7143	36.7211	42.5986	0.022362	1828.33	1.49707	0.807571	317	upstream oil
Russian Federation	RUS	9022	66.8337	77.2769	0.0223225	1730.51	1.6015	0.0740741	270	upstream gas
Iran	IRN	7775	30.2913	50.0638	0.0223153	1866.44	3.25546	0.599388	327	upstream oil
Iraq	IRQ	7212	35.5637	44.2838	0.0222801	1797.78	1.75213	0.780255	314	upstream oil
Russian Federation	RUS	10094	60.4924	97.4091	0.0222537	1565.58	1.58284	0.288991	218	upstream oil
Russian Federation	RUS	8653	62.4461	73.5506	0.0222389	1840.45	3.33612	0.450549	182	upstream oil
Iran	IRN	7815	30.1839	50.3717	0.0222241	1832.69	1.23183	0.598784	329	upstream oil
Iraq	IRQ	7296	31.0149	47.3101	0.0221916	1596.92	1.6015	0.7	300	upstream oil
Angola	AGO	6110	-6.0706	11.3579	0.0221739	1664.58	1.6015	0.829787	94	upstream oil
Iran	IRN	7819	30.6186	50.3882	0.0221606	1814.36	1.31756	0.688073	327	upstream oil
Kuwait	KWT	7378	29.0119	47.6668	0.0221436	1744.26	1.7883	0.792793	333	upstream oil
Iran	IRN	7822	30.1703	50.4097	0.0221374	1847.17	2.09668	0.671975	314	upstream oil
India	IND	9889	19.2142	72.1155	0.0221023	1642.13	0.849872	0.956897	232	upstream oil
Peru	PER	4314	-4.51257	-81.2307	0.022043	1842.92	3.98614	0.5	186	upstream oil
Venezuela	VEN	4283	9.97537	-63.1687	0.0220369	1671.55	1.08117	0.842424	165	upstream oil
Gabon	GAB	6087	-3.75557	10.5283	0.0220173	1837.77	2.16547	0.779661	59	upstream oil
Trinidad and Tobago	TTO	4310	10.7169	-60.5846	0.0219457	1752.08	1.01071	0.957983	119	upstream oil
Russian Federation	RUS	9060	66.5787	77.5367	0.0219412	1411.69	1.6015	0.152838	229	upstream gas
Iraq	IRQ	7173	36.3146	43.7431	0.0219096	1860.17	1.77778	0.611987	317	upstream oil
Russian Federation	RUS	10219	59.6794	108.284	0.0218823	1717.24	1.58371	0.485437	206	upstream oil
Russian Federation	RUS	11843	52.9333	143.498	0.0218461	1718.14	4.73432	0.79661	118	upstream oil
Gabon	GAB	6077	-1.79822	9.89716	0.0218432	1729.84	3.28011	0.659574	47	upstream oil
United Arab Emirates	ARE	8156	24.0623	54.32	0.0218292	1758.83	1.6015	0.379009	343	upstream oil
Russian Federation	RUS	8430	61.1907	66.6469	0.0218197	1812.26	1.81418	0.852792	197	upstream oil
Russian Federation	RUS	8744	61.3133	75.3131	0.0218147	1927.99	3.09405	0.457547	212	upstream oil
Saudi Arabia	SAU	7799	24.7466	50.2423	0.0218083	1776.57	1.92465	0.196532	346	upstream oil
Algeria	DZA	5412	29.0301	7.51944	0.0218049	1664.19	1.09534	0.841096	365	upstream oil
Iraq	IRQ	7165	36.209	43.5754	0.0217823	1774.73	1.48233	0.895238	315	upstream oil
Russian Federation	RUS	9222	66.6705	80.5764	0.0217764	1894.81	2.58524	0.620155	129	upstream oil
Indonesia	IDN	11443	4.93805	97.6099	0.0217628	1810.5	3.10481	0.833333	24	upstream oil
Argentina	ARG	4568	-38.3478	-68.6383	0.0217514	1810.78	2.22631	0.460064	313	upstream oil
Congo	COG	6111	-4.72384	11.3614	0.0217399	1776	1.3962	0.888889	54	upstream oil
Argentina	ARG	4514	-37.5286	-69.0908	0.021673	1805.72	1.55614	0.371711	304	upstream oil
Indonesia	IDN	11450	0.682146	101.118	0.0216699	1816.1	1.32922	0.684211	19	upstream oil
Cameroon	CMR	6018	4.33357	8.53265	0.0216409	1757.89	1.5828	0.769231	13	upstream oil
Australia	AUS	12025	-12.6596	124.545	0.0216391	1736.29	1.80327	0.462963	162	upstream oil
India	IND	9965	16.3601	81.2846	0.0216278	1882.7	1.51512	0.821782	202	upstream oil
Syria	SYR	7124	36.9921	42.0028	0.0216247	1783.29	1.52616	0.807818	307	upstream oil
Russian Federation	RUS	8917	62.8773	76.7726	0.0216181	1746.77	1.71712	0.793548	155	upstream oil
Mexico	MEX	3650	18.5127	-93.2852	0.0216086	1763.69	1.66474	0.529801	151	upstream oil
Egypt	EGY	7027	28.0493	33.3483	0.0215703	1827.54	0.755822	0.934426	366	upstream oil
Mexico	MEX	3616	18.0323	-93.9239	0.0215681	1783.36	2.5427	0.672131	183	upstream oil
Libya	LBY	5520	28.8904	9.95207	0.0215258	1610.8	1.004	0.626984	378	upstream oil
Brazil	BRA	4773	-22.5513	-40.2604	0.0214945	1800.72	1.40211	0.76	175	upstream oil
Australia	AUS	12080	-38.2283	147.171	0.0214843	1740.97	2.53102	0.790262	267	upstream oil
Indonesia	IDN	11553	4.14472	105.108	0.0214369	1676.71	2.25346	0.880952	42	upstream oil
Russian Federation	RUS	9149	64.188	79.6374	0.0213951	1765.11	3.93516	0.735849	106	upstream oil
Syria	SYR	7127	36.9637	42.0828	0.021365	1762.59	2.49237	0.703947	304	upstream oil
Uzbekistan	UZB	9671	38.562	65.9535	0.0213558	1721.96	1.39384	0.873846	325	upstream oil
Nigeria	NGA	5953	3.85465	6.98045	0.0212863	1700.77	1.17147	0.292683	41	upstream oil
China	CHN	11876	39.9671	120.827	0.0212797	1775.41	2.06137	0.85098	255	upstream oil
Russian Federation	RUS	8876	66.9936	76.4068	0.0212718	1733.07	1.6015	0.153153	222	upstream gas
Kazakhstan	KAZ	6945	46.242	57.7276	0.0212694	1869.66	1.28614	0.771536	267	upstream oil
United States	USA	828	48.1078	-102.854	0.0212331	1930.58	2.22806	0.791667	216	upstream oil
Libya	LBY	5583	28.4336	19.5877	0.02123	1839.29	1.17532	0.796392	388	upstream oil
Indonesia	IDN	11478	-1.16848	103.339	0.0212217	1670.61	1.73265	0.791667	24	upstream oil
United States	USA	1035	47.674	-102.485	0.0212158	1874.64	1.56707	0.823529	255	upstream oil
United Arab Emirates	ARE	8152	23.2773	54.2605	0.0211919	1682.08	3.18691	0.549708	342	upstream oil
Nigeria	NGA	5901	4.93792	5.60766	0.0211785	1743.96	1.27501	0.677778	90	upstream oil
Malaysia	MYS	11431	6.44535	115.435	0.0211058	1604.17	1.6015	0.710526	38	upstream oil
Russian Federation	RUS	8643	62.6288	73.2329	0.0211006	1768.86	1.77649	0.450867	173	upstream oil
Russian Federation	RUS	8795	58.0708	75.6172	0.0210999	1800.43	1.58924	0.734783	230	upstream oil
Malaysia	MYS	11437	6.64168	116.149	0.0210901	1703.32	2.25063	0.65	40	upstream oil
Canada	CAN	357	52.3065	-113.557	0.0210397	1819.68	1.13899	0.838384	198	upstream oil
Ecuador	ECU	4366	-0.222706	-76.8469	0.0210331	1926.7	1.46153	0.708333	48	upstream oil
Angola	AGO	6162	-5.48645	12.0665	0.0210306	1745.97	2.88428	0.637931	58	upstream oil
Ecuador	ECU	4375	-0.340328	-76.8289	0.0209679	1892.94	1.93202	0.735849	53	upstream oil
Venezuela	VEN	4182	9.66845	-63.6393	0.0209615	2024.92	4.33564	0.565217	138	upstream oil
Iran	IRN	8086	25.531	53.1683	0.0209525	1444.32	1.6015	0.706625	317	upstream oil
Vietnam	VNM	11387	8.36969	108.703	0.0209336	1761.79	2.84096	0.773585	53	upstream oil
Algeria	DZA	5507	27.6689	9.87774	0.020933	1686.52	1.02591	0.490667	375	upstream oil
United Kingdom	GBR	4944	59.3599	1.56993	0.0209275	1811.48	1.45301	0.685185	108	upstream oil
Russian Federation	RUS	10065	60.7901	96.9768	0.0209224	1557.38	0.772786	0.71134	194	upstream oil
Iran	IRN	7886	30.3363	50.7322	0.0209082	1736.74	1.85165	0.253247	308	upstream oil
Nigeria	NGA	5847	5.23771	6.62695	0.0208796	1751.39	2.23996	0.607595	79	upstream oil
Democratic Republic of the Congo	COD	6180	-5.81012	12.2307	0.0208426	1831.72	1.99451	0.653061	49	upstream oil
United States	USA	817	48.1018	-102.874	0.0208291	1947.17	1.6657	0.810345	232	upstream oil
Ecuador	ECU	4354	-0.293478	-76.8703	0.0208284	1942.29	3.17854	0.764706	51	upstream oil
Iran	IRN	7974	26.7283	52.0273	0.0208044	1659.84	1.17616	0.88	300	upstream oil
Indonesia	IDN	11486	-1.18877	103.371	0.0208027	1657.19	0.971113	0.962963	27	upstream oil
Iraq	IRQ	7217	35.5114	44.3753	0.0207983	1827.68	1.96661	0.724138	319	upstream oil
Russian Federation	RUS	10067	60.7411	97.0848	0.0207936	1574.96	0.854012	0.80226	177	upstream oil
Nigeria	NGA	5831	5.73342	6.39477	0.020788	1777.69	1.11768	0.835616	73	upstream oil
Iran	IRN	8025	26.4758	52.3233	0.0207854	1775.83	2.78859	0.853583	321	upstream oil
Thailand	THA	11282	16.8533	99.9959	0.0207815	1736.68	2.21157	0.794118	136	upstream oil
Russian Federation	RUS	6531	43.1951	46.2891	0.0207432	1865.52	1.8384	0.822581	186	upstream oil
Iran	IRN	7899	30.2721	50.8077	0.0206877	1773.11	1.12166	0.828947	304	upstream oil
China	CHN	11247	38.2134	119.555	0.0206694	1711.92	1.72304	0.800885	226	upstream oil
China	CHN	11232	39.1159	119.228	0.0206611	1799.86	2.40681	0.956	250	upstream oil
Venezuela	VEN	4251	9.65898	-63.5035	0.0206582	1944.96	1.6015	0.746479	142	upstream oil
Saudi Arabia	SAU	7589	24.7915	49.1827	0.0206397	1706.14	2.71856	0.815864	353	upstream oil
Iran	IRN	9603	36.4639	60.8504	0.020637	1721	1.18176	0.812317	341	upstream oil
United Kingdom	GBR	4830	57.8126	-0.975271	0.0205454	1779.11	1.67549	0.834646	127	upstream oil
Russian Federation	RUS	6345	66.1448	57.3815	0.0205385	1917.16	1.6015	0.664286	140	upstream oil
China	CHN	11385	20.6804	108.682	0.0205334	1794.41	1.762	0.857143	98	upstream oil
Indonesia	IDN	11563	4.95708	106.096	0.0205246	1789.47	2.29914	0.88	50	upstream oil
Russian Federation	RUS	6351	66.1513	57.6137	0.0205227	1770.24	2.04693	0.706215	177	upstream oil
Sudan	SDN	5891	11.4615	28.4298	0.0204743	1856.88	2.43351	0.794118	204	upstream oil
Argentina	ARG	4582	-38.0422	-68.5278	0.0204616	1739.37	2.13792	0.631579	323	upstream oil
United States	USA	24	70.2905	-148.444	0.0204291	1815.69	1.6015	0.755102	196	upstream oil
Algeria	DZA	5348	31.4058	5.97628	0.0204259	1808.71	2.54108	0.22252	373	upstream oil
Pakistan	PAK	9738	28.0525	69.3693	0.0204205	1665.19	1.579	0.750742	337	upstream oil
Syria	SYR	7081	35.1967	40.086	0.0203856	1775.36	2.82252	0.456897	348	upstream oil
Vietnam	VNM	11316	7.16171	104.056	0.0203833	1800.2	1.02996	0.746479	71	upstream oil
United States	USA	2650	32.4249	-101.347	0.0203827	1907.98	1.90694	0.653614	332	upstream oil
Indonesia	IDN	11685	3.47876	117.863	0.0203807	1910.91	3.1441	0.529412	17	upstream oil
Russian Federation	RUS	10168	58.2849	107.039	0.0202967	1626.94	0.733602	0.490826	218	upstream oil
United States	USA	2498	31.8324	-101.685	0.0202473	1830.15	4.60335	0.254717	318	upstream oil
India	IND	9890	19.1431	72.1198	0.0202231	1720.75	1.35846	0.965217	230	upstream oil
United States	USA	2458	32.2898	-101.748	0.0201866	1849.63	1.56724	0.269939	326	upstream oil
Cameroon	CMR	6023	4.30601	8.60022	0.020183	1718.1	2.04842	0.727273	22	upstream oil
United States	USA	26	70.29	-148.428	0.020176	1800.99	1.6015	0.73545	189	upstream oil
Nigeria	NGA	5902	4.87905	5.61578	0.0201488	1756.3	4.83628	0.411765	85	upstream oil
Azerbaijan	AZE	6622	40.0543	51.3064	0.0201288	1760.4	1.92759	0.237885	227	upstream oil
Russian Federation	RUS	6655	52.6048	51.887	0.0201228	1774.7	1.77149	0.437126	167	upstream oil
Nigeria	NGA	5955	4.55666	7.00324	0.0201133	1644.79	3.43602	0.234043	47	upstream oil
Kuwait	KWT	7438	28.9431	47.9663	0.0200956	1712.46	1.42089	0.892754	345	upstream oil
South Africa	ZAF	6244	-34.9707	22.1696	0.0200873	1759.98	1.91159	0.823045	243	upstream oil
Algeria	DZA	5297	27.7987	0.46274	0.0200773	1816.68	1.25964	0.902941	340	upstream oil
Oman	OMN	8344	20.9877	56.7744	0.0200407	1818.69	1.29696	0.877551	343	upstream oil
Saudi Arabia	SAU	7605	25.9643	49.2304	0.0199837	1862.86	1.6015	0.642651	347	upstream oil
Russian Federation	RUS	6340	66.1669	57.3245	0.0199765	1910.04	2.4806	0.637681	138	upstream oil
Iraq	IRQ	7266	30.9964	46.2194	0.01996	1781.27	1.48099	0.827988	343	upstream oil
Mexico	MEX	3714	19.5228	-92.1894	0.0199525	1516.41	1.12071	0.87574	169	upstream oil
Iran	IRN	7985	26.723	52.1034	0.0199426	1778.58	1.61333	0.859425	313	upstream oil
Venezuela	VEN	4089	9.68171	-66.3982	0.0199419	1438.08	1.13136	0.913043	161	upstream oil
Mexico	MEX	3641	17.4798	-93.3627	0.0199056	1742.9	2.27854	0.490566	159	upstream gas
Algeria	DZA	5361	31.3367	6.05829	0.0198993	1764.37	1.14879	0.896458	367	upstream oil
Russian Federation	RUS	6684	53.0399	52.4023	0.019848	1724.05	0.888678	0.598592	142	upstream oil
China	CHN	11388	20.8168	108.715	0.0198395	1790.32	1.75217	0.892473	93	upstream oil
Russian Federation	RUS	6722	52.6033	53.2133	0.0198378	1720.12	1.64051	0.205882	170	upstream oil
Egypt	EGY	7023	28.2474	33.2538	0.0198357	1791.75	1.85978	0.936232	345	upstream oil
Gabon	GAB	6042	-1.28172	8.78281	0.0198112	1640.21	1.68361	0.526316	57	upstream oil
Cameroon	CMR	6005	4.2192	8.38282	0.0198039	1684.86	1.6015	0.642857	28	upstream oil
United States	USA	17	70.3096	-148.728	0.0197904	1892.01	1.6015	0.845188	239	upstream oil
Venezuela	VEN	4111	9.22148	-64.51	0.0197695	1837	2.5871	0.496894	161	upstream oil
Canada	CAN	1101	49.0894	-101.113	0.0197664	1847.62	1.81757	0.871795	234	upstream oil
Mexico	MEX	3680	18.0024	-93.0863	0.0197581	1795.48	3.04614	0.472527	182	upstream oil
Indonesia	IDN	11672	-0.3407	117.424	0.0197498	1891.29	2.02286	0.972973	37	upstream oil
Libya	LBY	5559	29.5008	12.972	0.0197495	1803.54	1.51157	0.775773	388	upstream oil
Ecuador	ECU	4380	-0.327411	-76.8071	0.0197351	1904.5	1.79702	0.777778	63	upstream oil
Russian Federation	RUS	8523	61.3167	70.2923	0.0197243	1779.01	1.09494	0.818182	132	upstream oil
Saudi Arabia	SAU	7628	27.1014	49.3109	0.0197204	1698.57	1.89502	0.560748	321	upstream oil
Mexico	MEX	3715	19.565	-92.1859	0.0197111	1305.16	0.989595	0.974359	156	upstream oil
Mexico	MEX	3646	18.3863	-93.3098	0.0196992	1805.2	2.24478	0.491803	183	upstream oil
Angola	AGO	6196	-6.21333	12.3951	0.0196988	1723.71	3.01096	0.535714	112	upstream oil
Iran	IRN	7813	30.1161	50.3571	0.0196888	1715.64	4.8541	0.34139	331	upstream oil
Niger	NER	5874	15.9692	12.5599	0.0196328	1767.65	1.61553	0.816949	295	upstream oil
United States	USA	2422	31.7377	-101.799	0.0196249	1765.54	2.34607	0.28483	323	upstream oil
Gabon	GAB	6065	-1.77615	9.81272	0.0196234	1793.7	1.3437	0.604167	48	upstream oil
Iran	IRN	8014	26.8183	52.236	0.0196174	1769.27	1.68438	0.743827	324	upstream oil
Vietnam	VNM	11357	9.53745	107.935	0.0196173	1827.01	1.42307	0.902778	72	upstream oil
Indonesia	IDN	11593	-5.91033	107.928	0.0196133	1667.08	1.27874	0.846154	26	upstream oil
Saudi Arabia	SAU	7715	27.3	49.6872	0.0195626	1729.47	2.09052	0.768953	277	upstream oil
Brazil	BRA	4787	-22.423	-39.9574	0.0195309	1749.38	1.45266	0.670455	176	upstream oil
United States	USA	765	47.5146	-102.932	0.01953	1873.67	1.84966	0.42449	245	upstream oil
Australia	AUS	11699	-19.6519	115.93	0.0195049	1677.53	1.19455	0.929752	242	upstream oil
Ghana	GHA	4917	4.98095	-2.53025	0.0194924	1939.76	4.198	0.531532	111	upstream oil
Russian Federation	RUS	8605	60.7171	72.5191	0.0194409	1699.31	1.45546	0.378723	235	upstream oil
Russian Federation	RUS	6766	52.014	53.6449	0.0193964	1774.3	1.25173	0.78882	161	upstream oil
Algeria	DZA	5428	30.8264	8.02976	0.0193824	1537.37	0.871951	0.9	360	upstream oil
Cameroon	CMR	6012	4.30825	8.42288	0.0193724	1899.79	1.6015	0.96	25	upstream oil
Gabon	GAB	6048	-1.44912	8.95129	0.0193597	1809.83	1.45484	0.851064	47	upstream oil
Brazil	BRA	4741	-25.4494	-42.7532	0.0193494	1785.8	1.37567	0.42953	149	upstream oil
Libya	LBY	5628	29.2772	21.3736	0.0193395	1736.52	1.67366	0.59126	389	upstream oil
Libya	LBY	5557	33.7515	12.6825	0.0193312	1766.55	2.15075	0.646865	303	upstream oil
Australia	AUS	11702	-19.5888	116.447	0.0193278	1651.02	1.43408	0.314286	245	upstream oil
Algeria	DZA	5318	32.9056	3.37373	0.0193045	1789.56	3.67232	0.475758	330	upstream oil
Nigeria	NGA	5833	5.71599	6.42097	0.0193034	1638.31	1.2092	0.7	80	upstream oil
Indonesia	IDN	11564	-5.20835	106.21	0.0192926	1722.72	1.2414	0.580645	31	upstream oil
India	IND	10443	26.2995	94.0559	0.019272	1917.34	2.30607	0.840659	182	upstream oil
United States	USA	3095	28.9352	-97.8622	0.019219	1863.77	2.99262	0.467577	293	upstream oil
Russian Federation	RUS	8408	61.1981	64.6358	0.0192141	1949.03	2.82723	0.726087	230	upstream oil
Russian Federation	RUS	10324	55.2751	105.941	0.0192085	1410.62	0.754192	0.240566	212	upstream gas
Argentina	ARG	4539	-38.1674	-68.8359	0.0192079	1719.56	1.49878	0.786207	290	upstream oil
Mexico	MEX	3687	18.3863	-92.906	0.0191994	1930.87	1.46485	0.510638	188	upstream oil
United States	USA	1021	47.9334	-102.529	0.0191948	1905.43	1.17447	0.46988	249	upstream oil
Iraq	IRQ	7203	35.4164	44.1924	0.0191911	1625.49	0.92234	0.851266	316	upstream oil
Russian Federation	RUS	8450	62.9611	67.493	0.0191773	1807.73	1.01703	0.664804	179	upstream oil
Russian Federation	RUS	8851	61.4879	76.1164	0.0191718	1788.14	1.59555	0.783133	166	upstream oil
Oman	OMN	8366	21.4011	57.8751	0.0191642	1904.39	1.93247	0.704225	355	upstream oil
Russian Federation	RUS	10113	57.8761	105.862	0.0191569	1963.83	1.6015	0.517241	145	upstream oil
Mexico	MEX	3642	18.353	-93.3513	0.0191318	1938.01	1.55366	0.491892	185	upstream oil
United States	USA	3896	28.1923	-88.4953	0.0191197	1770.7	1.6015	0.766234	231	upstream oil
Russian Federation	RUS	6793	56.1107	54.0375	0.019108	1864.33	1.5579	0.757576	132	upstream oil
Venezuela	VEN	4229	9.6274	-63.5398	0.0190912	2018.17	1.6015	0.671642	134	upstream oil
Russian Federation	RUS	8526	61.4699	70.4024	0.0190839	1814.59	3.26753	0.0708333	240	upstream oil
Australia	AUS	11700	-19.5822	116.138	0.0190503	1743.19	0.946653	0.945525	257	upstream oil
Russian Federation	RUS	6881	56.6837	56.2376	0.019047	1958.29	2.44492	0.766667	180	upstream oil
Kazakhstan	KAZ	9303	45.7687	65.6388	0.0190276	1768.21	1.38735	0.653731	335	upstream oil
Sudan	SDN	5887	11.4965	28.227	0.0190265	1817.68	1.65502	0.92	200	upstream oil
United States	USA	2628	32.3968	-101.406	0.0190075	1804.18	1.16885	0.401254	319	upstream oil
Saudi Arabia	SAU	7643	25.2357	49.3376	0.0189869	1757.93	1.45603	0.801153	347	upstream oil
Indonesia	IDN	11595	-6.54864	108.095	0.0189835	1199.64	0.976266	0.56	25	upstream oil
Algeria	DZA	5447	27.1467	8.80676	0.0189592	1732.64	1.66356	0.812169	378	upstream oil
Qatar	QAT	7967	26.6265	51.9862	0.0189532	1887.56	1.75392	0.883117	308	upstream oil
Syria	SYR	7116	36.9526	41.659	0.0189487	1798.28	1.93502	0.869128	298	upstream oil
Brazil	BRA	4786	-22.1294	-39.9659	0.0189347	1823.57	2.60191	0.461538	169	upstream oil
Canada	CAN	1096	49.1161	-101.307	0.0189299	1876.67	1.43432	0.815574	244	upstream oil
Vietnam	VNM	11364	9.7698	107.989	0.0189136	1782.38	1.26472	0.797101	69	upstream oil
Gabon	GAB	6074	-2.42352	9.86889	0.0189014	1812.66	2.74756	0.44	50	upstream oil
Iran	IRN	7901	30.2718	50.819	0.0188927	1847.18	2.22427	0.607973	301	upstream oil
Russian Federation	RUS	9251	67.3179	83.1486	0.0188863	1697	1.23459	0.669643	112	upstream oil
United States	USA	2662	32.4535	-101.301	0.0188683	1903.56	2.00192	0.352025	321	upstream oil
Russian Federation	RUS	8543	66.1935	71.0212	0.0188581	1600.74	1.6015	0.633136	169	upstream oil
Turkmenistan	TKM	8067	39.4686	52.7606	0.0188413	1821.94	1.74909	0.411765	238	upstream oil
Oman	OMN	8290	19.582	55.7546	0.0188411	1810.14	1.08383	0.893293	328	upstream oil
Russian Federation	RUS	8899	61.0981	76.6608	0.0188408	1905.02	1.05627	0.851852	135	upstream oil
China	CHN	9418	40.8734	83.0282	0.0188371	1666.96	0.431977	0.91342	231	upstream oil
United States	USA	744	48.0809	-102.956	0.0187739	1905.02	1.55208	0.645669	254	upstream oil
United States	USA	2427	31.3447	-101.798	0.0187644	1750.84	1.6015	0.718563	334	upstream oil
Argentina	ARG	4501	-37.7132	-69.265	0.0187534	1743.32	2.76866	0.704615	325	upstream oil
Russian Federation	RUS	8693	62.3573	74.318	0.0187262	1760.74	2.64217	0.463542	192	upstream oil
Iraq	IRQ	7318	30.5572	47.3909	0.0187161	1067.35	1.6015	0.907121	323	upstream oil
Kuwait	KWT	7444	29.0223	48.0126	0.0186946	1686.06	2.93917	0.787172	343	upstream oil
Venezuela	VEN	4186	9.61231	-63.6268	0.0186892	2064.95	3.53946	0.673203	153	upstream oil
United Kingdom	GBR	4931	61.2402	1.14783	0.0186028	1746.28	1.32451	0.646341	82	upstream oil
Russian Federation	RUS	6765	54.1791	53.6255	0.0185804	1923.46	2.09191	0.723926	163	upstream oil
Russian Federation	RUS	6511	49.6208	45.3674	0.0185702	1850.14	1.78902	0.724528	265	upstream oil
Egypt	EGY	5687	30.626	26.9434	0.018565	1803.95	1.1951	0.885475	358	upstream oil
Mexico	MEX	3618	17.894	-93.9104	0.0185552	1959.21	1.35938	0.726708	161	upstream oil
Iraq	IRQ	7210	33.4442	44.2619	0.0185397	1667.87	1.58	0.649425	348	upstream oil
United States	USA	21	70.2815	-148.662	0.0185246	1882.18	1.6015	0.52514	179	upstream oil
Turkmenistan	TKM	9621	39.1569	62.5882	0.018502	1708.59	1.4158	0.736994	346	upstream oil
Russian Federation	RUS	9339	56.7484	78.7426	0.0184842	1831.43	1.91571	0.649789	237	upstream oil
Gabon	GAB	6066	-1.78942	9.82097	0.018445	1774.38	0.607765	0.708333	48	upstream oil
Nigeria	NGA	5988	4.10548	7.79962	0.0184431	1663.41	1.44308	0.611111	36	upstream oil
United States	USA	556	48.3154	-103.511	0.0184216	1902.74	3.17166	0.40625	256	upstream oil
Equatorial Guinea	GNQ	5997	3.85902	8.12529	0.0183839	1562.67	1.65476	0.172414	29	upstream oil
Russian Federation	RUS	9034	66.682	77.3205	0.0183327	1759.65	1.35472	0.694915	118	upstream gas
Russian Federation	RUS	8638	60.9353	73.026	0.0183277	1812.67	2.25475	0.468293	205	upstream oil
Egypt	EGY	5751	29.743	28.775	0.0183135	1739.39	1.1181	0.712121	396	upstream oil
Egypt	EGY	7042	28.0291	33.7775	0.018304	1694.91	1.33653	0.839237	367	upstream oil
China	CHN	9480	41.3178	83.8426	0.0182569	1782.64	1.86291	0.70922	282	upstream oil
Qatar	QAT	8004	26.0167	52.1868	0.0182551	1701.68	1.6015	0.0996979	331	upstream oil
Russian Federation	RUS	8626	59.0405	72.8334	0.0182381	1840.96	1.72706	0.782609	184	upstream oil
United States	USA	1981	33.1699	-103.046	0.0182297	1895.3	1.39585	0.643077	325	upstream oil
Russian Federation	RUS	9126	67.3021	79.0795	0.0181922	1771.76	0.829157	0.710383	183	upstream oil
India	IND	10459	27.2611	95.1505	0.0181747	1803.78	2.01893	0.79661	177	upstream oil
Yemen	YEM	8245	15.5433	45.9554	0.0181606	1714.35	1.40128	0.882716	324	upstream oil
Bangladesh	BGD	10435	24.868	92.0236	0.0181587	1724.98	2.3341	0.746193	197	upstream oil
Mexico	MEX	3640	17.6562	-93.3615	0.0181537	1579.19	2.38511	0.644068	177	upstream gas
Egypt	EGY	5726	29.8778	27.9418	0.0181345	1678.66	1.38101	0.302872	383	upstream oil
Russian Federation	RUS	10263	60.9027	112.141	0.018123	1645.26	1.11302	0.640719	167	upstream oil
Egypt	EGY	5728	29.8198	27.9746	0.0180771	1664.97	0.806535	0.375	384	upstream oil
United States	USA	682	47.9636	-103.083	0.018066	1872.35	2.10698	0.56044	273	upstream oil
Russian Federation	RUS	10351	57.3997	107.164	0.0180585	1429.7	1.6015	0.123894	226	upstream oil
Egypt	EGY	7024	28.1229	33.2781	0.0180431	1828.66	1.9925	0.785124	363	upstream oil
United States	USA	1972	32.1495	-103.056	0.0180425	1779.05	1.82674	0.577287	317	upstream oil
Iran	IRN	7264	32.9973	46.2018	0.018032	1702.62	1.6015	0.657321	321	upstream oil
China	CHN	11229	39.1	119.181	0.0180288	1807.51	1.89157	0.951613	248	upstream oil
Niger	NER	5875	15.6285	12.9266	0.0180283	1812.49	1.38132	0.890034	291	upstream oil
Iran	IRN	7859	30.3913	50.5825	0.0180141	1802.8	1.30647	0.527778	324	upstream oil
Algeria	DZA	5306	33.8732	2.6606	0.0180101	1756.65	1.5266	0.90099	303	upstream oil
Australia	AUS	12046	-21.8639	148.024	0.0180057	1853.09	4.04429	0.608209	268	upstream oil
Uzbekistan	UZB	9646	38.9415	64.7932	0.0179996	1759.14	1.4994	0.818942	359	upstream oil
United States	USA	2036	33.0507	-102.909	0.0179597	1865.69	1.83078	0.742236	322	upstream oil
Syria	SYR	7111	37.0124	41.5848	0.017927	1811.8	1.53352	0.504886	307	upstream oil
Kuwait	KWT	7411	29.8577	47.8005	0.017925	1692.06	3.35292	0.718391	348	upstream oil
Gabon	GAB	6083	-2.03322	9.99633	0.0179005	1938.89	1.69452	0.725806	62	upstream oil
United Arab Emirates	ARE	8105	24.8289	53.6218	0.0178914	1710.77	1.80362	0.828746	327	upstream oil
India	IND	9845	23.7758	85.8398	0.0178278	1788.3	2.58246	0.704846	227	upstream oil
Saudi Arabia	SAU	7237	24.6972	44.9726	0.0178049	1697.11	1.57412	0.833333	324	upstream oil
Nigeria	NGA	5822	5.45916	6.1799	0.0178015	1700.79	2.25661	0.571429	84	upstream oil
Russian Federation	RUS	8874	66.9929	76.3915	0.0177911	1758.65	1.6015	0.172727	220	upstream gas
Iraq	IRQ	7145	36.4584	42.6695	0.0177554	1770.59	1.34483	0.708333	336	upstream oil
Argentina	ARG	4557	-38.191	-68.7014	0.0177371	1836.09	1.64259	0.401274	314	upstream oil
Brazil	BRA	4792	-22.0866	-39.8286	0.0177226	1744.58	1.84488	0.695402	174	upstream oil
Algeria	DZA	5515	27.7425	9.91887	0.0177144	1662.65	1.0779	0.23822	382	upstream oil
Russian Federation	RUS	6317	59.1446	56.8615	0.0177132	1724.21	1.6015	0.202899	207	upstream oil
Russian Federation	RUS	6884	54.7858	56.3452	0.0177106	1881	1.93786	0.625899	139	upstream oil
Russian Federation	RUS	6694	51.5844	52.7304	0.0177023	1795.53	1.32631	0.847291	203	upstream oil
Turkmenistan	TKM	8120	39.5149	53.7662	0.0176753	1768.79	1.3449	0.813056	337	upstream oil
Qatar	QAT	7896	25.2872	50.7973	0.0176641	1855.75	1.6015	0.676966	356	upstream oil
Oman	OMN	8318	21.6636	56.4123	0.0176492	1864.22	3.30993	0.657224	353	upstream oil
Nigeria	NGA	5920	4.43391	6.32493	0.0176468	1723.92	0.995519	0.188119	101	upstream oil
United States	USA	2257	31.7988	-102.086	0.0176438	1859.29	2.98811	0.526316	323	upstream oil
Mexico	MEX	3685	18.0747	-93.0443	0.0176343	1835.95	1.70753	0.767956	181	upstream oil
Russian Federation	RUS	9249	67.3183	83.1312	0.0176195	1697.56	1.36468	0.612403	129	upstream oil
Nigeria	NGA	5985	3.95549	7.75806	0.0175899	1807.94	1.78558	0.794118	34	upstream oil
United States	USA	2677	32.4192	-101.215	0.0175853	1943.48	1.52042	0.674772	329	upstream oil
Indonesia	IDN	11451	1.26123	101.133	0.0175846	1833.02	2.42597	0.65625	32	upstream oil
United States	USA	1819	32.4124	-103.415	0.0175807	1870.95	1.74542	0.364198	324	upstream oil
United States	USA	713	47.8462	-103.014	0.0175736	1908.64	2.12176	0.576336	262	upstream oil
Uzbekistan	UZB	9638	38.811	64.6236	0.0175711	1811.49	2.31444	0.80663	362	upstream oil
Russian Federation	RUS	6811	52.2779	54.4499	0.0175568	1784.75	1.86535	0.543624	149	upstream oil
Russian Federation	RUS	8701	62.3902	74.5141	0.0175333	1798.79	2.05939	0.730769	156	upstream oil
Saudi Arabia	SAU	7593	24.883	49.1925	0.017478	1786.02	1.42837	0.6	355	upstream oil
Ecuador	ECU	4356	-0.420274	-76.8697	0.0174595	1913.65	1.53183	0.75	56	upstream oil
United States	USA	569	47.9062	-103.472	0.0174517	1881.28	1.02551	0.439834	241	upstream oil
Malaysia	MYS	11334	5.50135	105.208	0.0174344	1750.72	1.48418	0.7	60	upstream oil
Oman	OMN	8328	21.909	56.4833	0.0174293	1769.55	1.6015	0.545723	339	upstream oil
Russian Federation	RUS	8431	61.5247	66.6712	0.0173977	1888.23	1.6662	0.74375	160	upstream oil
Russian Federation	RUS	8823	62.3533	75.8422	0.0173848	1840.71	1.6015	0.338462	195	upstream oil
Libya	LBY	5649	27.945	22.3837	0.0173549	1645.7	1.14032	0.775773	388	upstream oil
Libya	LBY	5524	28.9446	10.0222	0.0173514	1710.65	1	0.661333	375	upstream oil
Egypt	EGY	5750	29.634	28.7174	0.0173471	1805.17	1.96246	0.737374	396	upstream oil
Saudi Arabia	SAU	7783	25.6214	50.1	0.0173457	1754.65	3.45065	0.0925373	335	upstream oil
Nigeria	NGA	5825	6.04203	6.27642	0.0173404	1714.51	1.38776	0.73913	92	upstream oil
Russian Federation	RUS	8645	61.7725	73.3479	0.0173312	1803.58	1.87807	0.5	162	upstream oil
Ecuador	ECU	4362	-0.407307	-76.8572	0.0173135	1939.04	2.20291	0.763636	55	upstream oil
Russian Federation	RUS	9073	66.1889	77.6976	0.0172952	1780.9	1.1881	0.583333	120	upstream gas
Russian Federation	RUS	6833	51.6011	55.1653	0.0172596	1430.45	0.571347	0.865922	179	upstream oil
Pakistan	PAK	9767	33.4074	71.9393	0.0172169	1823.69	1.61298	0.781155	329	upstream oil
Russian Federation	RUS	6658	54.7297	51.896	0.0172161	1930.49	1.50985	0.81203	133	upstream oil
Malaysia	MYS	11648	4.67425	113.857	0.0171869	1709.83	1.44158	0.727273	11	upstream oil
United States	USA	2666	32.4817	-101.288	0.0171759	1898.96	1.65864	0.396341	328	upstream oil
Egypt	EGY	5717	30.8633	27.6011	0.0171621	1725.19	0.996012	0.521008	357	upstream oil
Egypt	EGY	5693	30.7051	26.9796	0.017122	1746.24	1.79123	0.780282	355	upstream oil
Russian Federation	RUS	10261	60.9231	112.076	0.0170999	1711.42	1.34945	0.40708	226	upstream oil
Russian Federation	RUS	8623	58.9239	72.7655	0.0170799	1886.37	2.21924	0.690265	226	upstream oil
Gabon	GAB	6049	-1.36697	9.05835	0.017071	1764.79	2.05549	0.705882	51	upstream oil
Libya	LBY	5525	28.8927	10.023	0.0170694	1842.24	2.74914	0.577836	379	upstream oil
Russian Federation	RUS	9079	64.3505	77.8131	0.0170238	1756.71	1.42729	0.526882	186	upstream oil
Venezuela	VEN	4091	9.3006	-65.6739	0.0170205	1856.4	3.63234	0.22561	164	upstream oil
United States	USA	2762	32.9532	-99.9882	0.0170082	1879.47	2.3517	0.765472	307	upstream oil
Libya	LBY	5599	28.5156	19.8694	0.0170048	1701.38	1.20629	0.741144	367	upstream oil
Mexico	MEX	3677	17.8433	-93.0984	0.0169935	1520.52	1.6015	0.559748	159	upstream oil
United States	USA	2335	32.4703	-101.935	0.016981	1907.78	1.39973	0.402402	333	upstream oil
Egypt	EGY	5742	29.5516	28.5364	0.0169762	1817.12	1.4496	0.855263	380	upstream oil
Syria	SYR	7088	36.1112	40.8085	0.0169626	1939.69	2.06993	0.755682	352	upstream oil
Russian Federation	RUS	9107	58.3291	78.4894	0.016955	1818.82	2.54723	0.830918	207	upstream oil
Angola	AGO	6124	-5.48919	11.5144	0.0169321	1731.7	2.52718	0.675676	74	upstream oil
Colombia	COL	4001	9.87929	-74.6266	0.016932	1864.49	3.35405	0.728814	118	upstream oil
United States	USA	3102	28.994	-97.8452	0.0169311	1895.56	2.2858	0.529412	289	upstream oil
Russian Federation	RUS	6358	68.6103	58.0097	0.0169303	1808.23	4.05463	0.453782	119	upstream oil
Iraq	IRQ	7455	30.4143	48.0931	0.0169167	1676.39	1.42377	0.721408	341	upstream oil
Iran	IRN	7992	26.7203	52.1364	0.016862	1785.08	1.74306	0.754777	314	upstream oil
Russian Federation	RUS	8423	61.5089	66.1296	0.0168603	1793.35	1.5118	0.63964	222	upstream oil
Ecuador	ECU	4335	-0.592474	-76.9145	0.0168597	1833.12	2.43581	0.672727	55	upstream oil
Indonesia	IDN	11560	4.90382	106.003	0.0168562	1757.37	1.97897	0.745455	55	upstream oil
Yemen	YEM	8248	15.3479	46.037	0.0168532	1698.12	2.67164	0.709581	334	upstream oil
Indonesia	IDN	11661	-0.912401	117.114	0.0168246	1787.15	1.6015	0.641026	39	upstream oil
Bahrain	BHR	7846	25.9654	50.542	0.0168189	1799.42	1.58754	0.343284	335	upstream oil
Russian Federation	RUS	10127	57.6565	106.069	0.0168172	1497.11	1.6015	0.171875	192	upstream oil
Russian Federation	RUS	10218	59.6821	108.27	0.0167998	1745.92	1.22538	0.446154	195	upstream oil
Nigeria	NGA	5826	5.01835	6.30018	0.0167956	1814.26	1.6015	0.730769	78	upstream oil
Kazakhstan	KAZ	6925	48.3908	57.3572	0.0167935	1887.44	1.61307	0.732	250	upstream oil
Australia	AUS	12040	-28.1117	140.203	0.016669	1734.96	1.9056	0.284345	313	upstream oil
Libya	LBY	5580	28.4538	19.5225	0.016663	1809.98	1.42462	0.620253	395	upstream oil
United States	USA	1919	31.4323	-103.22	0.0166398	1792.03	1.94059	0.366972	327	upstream oil
Nigeria	NGA	5811	6.03889	5.71755	0.016609	1776.04	1.6015	0.697917	96	upstream oil
Iraq	IRQ	7393	30.2956	47.7361	0.0165896	1576.99	1.73068	0.445513	312	upstream oil
China	CHN	9364	41.8304	81.7813	0.0165889	1405.4	1.01621	0.886256	211	upstream oil
Saudi Arabia	SAU	7721	25.7691	49.7246	0.0165778	1760.06	1.6015	0.0714286	350	upstream oil
Egypt	EGY	5675	30.3063	26.0419	0.0165709	1708.86	0.842663	0.614776	379	upstream oil
Iran	IRN	7594	32.1423	49.1965	0.0165274	1805.98	1.27928	0.850467	321	upstream oil
Iran	IRN	7897	30.2105	50.8003	0.0165263	1787.66	1.38701	0.401294	309	upstream oil
Ecuador	ECU	4361	-0.308804	-76.8566	0.0165051	1917.82	2.26213	0.66129	62	upstream oil
Iran	IRN	7823	30.1574	50.4072	0.0164963	1837.51	3.56567	0.443396	318	upstream oil
Russian Federation	RUS	8424	61.5082	66.1411	0.0164784	1743.63	1.63877	0.643836	219	upstream oil
Argentina	ARG	4566	-38.3166	-68.666	0.0164499	1801.32	1.40534	0.251572	318	upstream oil
Russian Federation	RUS	6576	51.9663	49.9944	0.0164209	1812.69	1.74722	0.694444	180	upstream oil
United Kingdom	GBR	5035	56.4524	2.28656	0.0164002	1769.8	1.76761	0.628205	156	upstream oil
China	CHN	11230	39.1107	119.204	0.0163804	1842.75	1.74562	0.717213	244	upstream oil
Iraq	IRQ	7181	36.1482	43.7783	0.0163694	1725.69	3.61952	0.555911	313	upstream oil
Algeria	DZA	5302	29.0865	2.21434	0.0163672	1825.97	1.55132	0.866667	360	upstream oil
Nigeria	NGA	5951	4.93336	6.97633	0.0163564	1722.02	2.42414	0.392857	84	upstream oil
Saudi Arabia	SAU	7650	25.1945	49.3529	0.0163427	1742.78	2.15995	0.688761	347	upstream oil
Indonesia	IDN	11527	-3.37174	104.04	0.0163404	1905.53	1.72643	0.5	10	upstream oil
Russian Federation	RUS	6294	66.4313	56.6072	0.01634	1620.68	0.782819	0.730337	178	upstream oil
Russian Federation	RUS	9070	62.1326	77.6215	0.0162798	1739.84	1.97694	0.713178	129	upstream oil
Russian Federation	RUS	6720	57.4559	53.1857	0.0162671	1857.82	1.66782	0.790541	148	upstream oil
United Kingdom	GBR	4929	58.0477	1.13859	0.0162512	1765.64	1.45673	0.768519	108	upstream oil
Malaysia	MYS	11642	4.78587	113.494	0.0162361	1589.54	1.47998	0.5625	16	upstream oil
Iran	IRN	7903	30.2638	50.8299	0.0162334	1899.13	1.75329	0.668896	299	upstream oil
Saudi Arabia	SAU	7520	27.8086	48.8657	0.016219	1728.8	1.99763	0.685801	331	upstream oil
United States	USA	1932	31.2953	-103.182	0.0162088	1868.76	3.43281	0.258462	325	upstream oil
China	CHN	11233	38.2543	119.233	0.0161832	1831.05	2.12505	0.771429	245	upstream oil
Venezuela	VEN	4275	9.84501	-63.3191	0.016181	1901.8	1.6015	0.766082	171	upstream oil
United States	USA	690	47.5006	-103.064	0.0161742	1790.94	1.06272	0.367424	264	upstream oil
Iran	IRN	7825	30.1679	50.4388	0.0161729	1847.91	1.55185	0.565217	322	upstream oil
Iran	IRN	7735	30.4477	49.8353	0.0161709	1837.16	1.00898	0.385075	335	upstream oil
Ecuador	ECU	4383	-0.472345	-76.7885	0.0161696	1899.44	1.76201	0.803922	51	upstream oil
Indonesia	IDN	11681	-0.465038	117.588	0.0161524	1853.58	1.83243	0.75	12	upstream oil
Russian Federation	RUS	10100	60.7269	97.603	0.0161296	1576.33	1.6015	0.191304	230	upstream oil
Russian Federation	RUS	8621	60.385	72.7547	0.0161125	1989.64	2.11789	0.601852	216	upstream oil
Russian Federation	RUS	9059	66.519	77.5291	0.0161122	1679.84	1.6015	0.0833333	252	upstream gas
Ecuador	ECU	4402	0.012434	-76.5905	0.0161082	1911.29	1.13023	0.702128	47	upstream oil
Egypt	EGY	5709	30.8526	27.2321	0.0160967	1756.11	1.21637	0.730114	352	upstream oil
China	CHN	11719	40.2433	121.025	0.0160688	1748.94	1.99978	0.452206	272	upstream oil
Congo	COG	6123	-4.79491	11.4713	0.016065	1709.69	3.47823	0.47541	61	upstream oil
Qatar	QAT	7977	25.8541	52.0401	0.0160275	1747.31	1.6015	0.0769231	325	upstream oil
Oman	OMN	8327	22.3195	56.4795	0.0160253	1801.9	1.6015	0.642458	358	upstream oil
United Kingdom	GBR	4936	61.6195	1.30647	0.0160064	1805.39	1.48434	0.447917	96	upstream oil
Russian Federation	RUS	6300	66.9532	56.6562	0.0160011	1835.95	2.05687	0.579439	107	upstream oil
United States	USA	23	70.3236	-148.523	0.0159831	1485.28	1.6015	0.786957	230	upstream oil
United States	USA	777	48.0916	-102.918	0.0159823	1969.13	1.75002	0.505703	263	upstream oil
Iran	IRN	7917	34.519	51.2458	0.015975	1745.6	1.71666	0.777429	319	upstream oil
Egypt	EGY	5692	30.7541	26.9746	0.0159621	1800.09	1.73418	0.467422	353	upstream oil
Uzbekistan	UZB	9639	38.7879	64.6378	0.0159512	1816.23	2.64987	0.676796	362	upstream oil
Russian Federation	RUS	6689	53.6255	52.5526	0.0159491	1831.69	1.85705	0.772414	145	upstream oil
Iran	IRN	8017	27.9071	52.2679	0.0159283	1860.34	3.21619	0.758209	335	upstream oil
Nigeria	NGA	6001	4.58216	8.19073	0.0159244	1691.78	1.14869	0.487805	41	upstream oil
Congo	COG	6097	-4.41519	11.0372	0.0158944	1820.49	1.40362	0.57377	61	upstream oil
Brazil	BRA	4746	-25.2273	-42.5705	0.0158509	1696.33	1.6015	0.460606	165	upstream oil
India	IND	10478	27.3405	95.4815	0.0158383	1851.96	2.3121	0.763314	169	upstream oil
Ecuador	ECU	4385	-0.002246	-76.7747	0.0158216	1926.38	1.81779	0.744186	43	upstream oil
Pakistan	PAK	9719	28.6099	68.6311	0.0158173	1649.85	1.31922	0.774648	355	upstream oil
Australia	AUS	12022	-13.9638	123.314	0.0158023	1784.34	1.75526	0.0765306	196	upstream oil
Iraq	IRQ	7362	30.5478	47.5957	0.0157996	2001.42	3.8817	0.608974	312	upstream oil
Ecuador	ECU	4360	-0.370571	-76.8619	0.015796	1971.73	3.15028	0.722222	54	upstream oil
United States	USA	2542	32.3878	-101.61	0.0157925	1813.83	1.28535	0.310241	332	upstream oil
Peru	PER	4318	-4.91766	-81.1293	0.0157924	1813.43	1.17831	0.513514	111	upstream oil
Kuwait	KWT	7420	29.7964	47.8835	0.0157839	1850.77	0.803759	0.749288	351	upstream oil
Indonesia	IDN	11999	-2.87825	122.166	0.0157763	1448.79	1.6015	0.484848	33	upstream oil
Saudi-Kuwaiti Neutral Zone	SAUKWTNZ	7426	28.6317	47.9054	0.015742	1795.99	1.55911	0.758721	344	upstream oil
Russian Federation	RUS	9094	65.0815	78.2876	0.0157301	1727.23	1.90097	0.704	125	upstream oil
Brazil	BRA	4744	-25.0234	-42.6682	0.0157297	1658.61	2.23169	0.505814	172	upstream oil
Indonesia	IDN	11587	-6.04677	107.525	0.0157263	1737.58	1.11538	0.904762	21	upstream oil
United States	USA	522	47.9233	-103.78	0.0156989	1801.74	2.5966	0.360996	241	upstream oil
United States	USA	570	47.862	-103.466	0.0156903	1880.6	2.45093	0.211618	241	upstream oil
Kazakhstan	KAZ	6929	48.3078	57.3949	0.0156887	1789.07	1.6015	0.0363636	275	upstream oil
United States	USA	1489	31.9762	-103.754	0.0156879	1898.52	2.43986	0.709265	313	upstream oil
Russian Federation	RUS	6322	65.0077	56.9269	0.0156695	1768.43	2.28647	0.480519	154	upstream oil
Iraq	IRQ	7252	33.0296	46.0146	0.0156596	1775.59	1.6015	0.331361	338	upstream oil
Saudi Arabia	SAU	7347	25.1729	47.5276	0.0156464	1718.75	2.80394	0.775568	352	upstream oil
United Kingdom	GBR	4939	60.856	1.46894	0.0156395	1760.11	1.73914	0.484848	99	upstream oil
Egypt	EGY	7039	27.6701	33.6659	0.0156226	1762.7	1.90653	0.712676	355	upstream oil
Yemen	YEM	8250	15.5851	46.1653	0.0156076	1782.79	1.56976	0.775076	329	upstream oil
Kuwait	KWT	7414	29.8427	47.8467	0.0156033	1779.4	2.02209	0.769886	352	upstream oil
United States	USA	2751	28.3438	-100.063	0.0155941	1900.98	1.86083	0.522337	291	upstream oil
Ecuador	ECU	4343	-0.793264	-76.8857	0.015594	1900.41	3.20533	0.690909	55	upstream oil
Venezuela	VEN	4206	9.68461	-63.5927	0.0155869	2050.09	3.48347	0.563758	149	upstream oil
Vietnam	VNM	11356	9.55524	107.828	0.015567	1864.03	1.73937	0.430233	86	upstream oil
Saudi Arabia	SAU	7459	25.2521	48.1017	0.0155648	1766.61	1.6015	0.703264	337	upstream oil
Russian Federation	RUS	6667	52.5862	51.9879	0.0155494	1937.49	1.80101	0.535519	183	upstream oil
Gabon	GAB	6050	-1.45229	9.11765	0.0155476	1771.44	1.59532	0.592593	54	upstream oil
Turkmenistan	TKM	9644	38.6039	64.7567	0.0155397	1773.96	2.04893	0.676056	355	upstream oil
China	CHN	9451	40.8583	83.4476	0.0155003	1730.39	1.23697	0.637725	334	upstream oil
Angola	AGO	6148	-5.25287	11.8489	0.0155	1782.02	4.88676	0.428571	56	upstream oil
Nigeria	NGA	5820	5.48969	6.136	0.0154831	1831.59	1.50641	0.619565	92	upstream oil
Russian Federation	RUS	9237	67.7086	81.2584	0.0154555	1658.11	0.88365	0.429319	191	upstream gas
Iran	IRN	7908	30.1902	50.8642	0.0154514	1815.22	1.40143	0.378641	309	upstream oil
Mexico	MEX	3565	18.8364	-97.2744	0.0154507	1647.25	1.80189	0.614035	228	upstream oil
Algeria	DZA	5406	28.6129	7.50142	0.0154483	1725.13	1.69168	0.709497	358	upstream oil
United States	USA	1417	31.9127	-103.863	0.0154213	1920.16	1.77591	0.675079	317	upstream oil
Indonesia	IDN	11487	-3.26181	103.371	0.015416	1846.63	1.86839	0.538462	13	upstream oil
Russian Federation	RUS	6572	51.8455	49.9074	0.0154114	1735.48	0.819043	0.737968	187	upstream oil
Ecuador	ECU	4367	-0.239656	-76.846	0.0153813	1878.48	1.99402	0.76	50	upstream oil
United States	USA	1192	32.674	-104.427	0.0153624	1844.83	1.91505	0.280757	317	upstream oil
Saudi Arabia	SAU	7599	24.8904	49.2105	0.0153347	1774.89	1.73528	0.813031	353	upstream oil
Nigeria	NGA	5949	4.5545	6.90078	0.0153176	1760.07	1.6015	0.314815	54	upstream oil
Libya	LBY	5636	29.2531	21.5484	0.0152743	1550.16	0.278703	0.784574	376	upstream oil
United States	USA	2415	31.8534	-101.803	0.015241	1841.09	2.5499	0.0835913	323	upstream oil
India	IND	10447	26.8098	94.6959	0.0152403	1762.76	2.0901	0.657459	181	upstream oil
Oman	OMN	8274	17.9975	55.1618	0.0152319	1825.61	1.17206	0.58006	331	upstream oil
Malaysia	MYS	11330	5.53091	104.988	0.0152176	1744.81	1.06072	0.826923	52	upstream oil
Russian Federation	RUS	8683	58.7036	73.9946	0.0152102	1784.25	1.95119	0.68	175	upstream oil
China	CHN	11418	21.3533	114.736	0.0152063	1692.25	1.77092	0.823529	102	upstream oil
Argentina	ARG	4584	-38.2217	-68.5205	0.0151898	1863.75	1.93199	0.62037	324	upstream oil
Russian Federation	RUS	8699	62.4918	74.4054	0.0151858	1780.33	4.75093	0.192308	234	upstream oil
China	CHN	10633	36.197	107.79	0.0151594	1902.52	1.80084	0.705882	255	upstream oil
Mexico	MEX	3662	17.8878	-93.1561	0.0151572	1704.93	1.6015	0.719512	164	upstream oil
United States	USA	15	70.3068	-148.864	0.0151559	1850.18	1.6015	0.557377	183	upstream oil
Kuwait	KWT	7349	30.0163	47.5398	0.015144	1854.79	1.89549	0.623145	337	upstream oil
Thailand Malaysia Joint Development Area	THAMYSJDA	11310	7.59209	102.987	0.0151065	1496.09	2.33697	0.619718	71	upstream oil
Indonesia	IDN	11519	-2.10132	103.799	0.0151034	1658.15	0.752385	0.84	25	upstream oil
Chad	TCD	5879	8.51577	16.5425	0.0151	1772.83	2.30028	0.477273	132	upstream oil
United States	USA	1866	32.1671	-103.338	0.0150981	1927.76	1.29521	0.265823	316	upstream oil
Russian Federation	RUS	9146	62.4532	79.6148	0.0150875	1726.29	2.27238	0.412791	172	upstream oil
Brunei	BRN	11651	4.95006	114.07	0.0150745	1751.58	2.25423	0.823529	17	upstream oil
China	CHN	9827	39.8414	82.88	0.0150552	1776.78	2.18267	0.574074	270	upstream oil
Russian Federation	RUS	8806	58.2097	75.7152	0.015052	1773.19	1.83887	0.666667	240	upstream oil
Saudi Arabia	SAU	7346	25.1773	47.5195	0.0150437	1700.8	1.30776	0.668571	350	upstream oil
Kazakhstan	KAZ	6688	47.2541	52.4898	0.0150425	1715.32	1.80907	0.419795	293	upstream oil
Venezuela	VEN	4094	8.38098	-64.9581	0.0150417	1764.21	1.6015	0.610169	118	upstream oil
United Kingdom	GBR	5021	57.4506	1.39167	0.0150262	1786.48	1.49848	0.590909	132	upstream oil
Kazakhstan	KAZ	6908	47.3607	57.0158	0.0150148	1566.65	1.6015	0.521595	301	upstream oil
Oman	OMN	8189	23.3509	55.8225	0.015009	1764.66	0.73208	0.593472	337	upstream oil
Russian Federation	RUS	10337	55.391	106.286	0.0149987	1434.78	1.6015	0.0877193	228	upstream gas
Iran	IRN	7912	30.1894	50.9206	0.0149949	1908.78	1.72214	0.507886	317	upstream oil
Russian Federation	RUS	9019	66.7521	77.2617	0.0149942	1562.54	1.6015	0.0748031	254	upstream gas
Russian Federation	RUS	8907	62.3335	76.7335	0.0149438	1807.51	1.9336	0.510638	188	upstream oil
Egypt	EGY	7035	27.8405	33.5773	0.0149406	1761.57	1.78278	0.735849	371	upstream oil
Indonesia	IDN	11547	-3.81552	104.34	0.0149339	1742.73	1.54229	0.764706	17	upstream oil
Russian Federation	RUS	6492	44.6724	44.7257	0.0149165	1816.7	1.77992	0.715736	197	upstream oil
Vietnam	VNM	11371	7.34381	108.312	0.0149076	1739.58	1.86048	0.584615	65	upstream oil
Gabon	GAB	6040	-1.20945	8.77213	0.0149062	1864.14	1.37109	0.673469	49	upstream oil
Malaysia	MYS	11633	3.5686	112.829	0.0149057	1825.99	2.22724	0.714286	21	upstream oil
United States	USA	1026	47.9334	-102.507	0.0148753	1959.27	1.73031	0.521912	251	upstream oil
United States	USA	1015	47.9639	-102.53	0.0148697	1962.19	3.2069	0.314176	261	upstream oil
Ecuador	ECU	4386	-0.1566	-76.7521	0.01486	1933.48	1.51806	0.688889	45	upstream oil
Russian Federation	RUS	8853	64.3009	76.1321	0.0148574	1836.77	2.04289	0.636364	176	upstream oil
Thailand	THA	11297	10.5208	101.278	0.0148516	1689.44	2.44613	0.770492	61	upstream oil
Russian Federation	RUS	8652	62.5403	73.5287	0.0148495	1895.91	1.03454	0.348485	198	upstream oil
Venezuela	VEN	4140	9.61739	-63.7559	0.0148464	1940.07	1.6015	0.593548	155	upstream oil
India	IND	10445	26.785	94.6724	0.0148456	1758.82	1.64048	0.747253	182	upstream oil
Gabon	GAB	6090	-3.68261	10.7366	0.0148402	1798.95	2.38142	0.679245	53	upstream oil
Egypt	EGY	5743	29.7883	28.5523	0.0148327	1768.98	1.49103	0.793011	372	upstream oil
Nigeria	NGA	5993	4.60595	8.01583	0.0148319	1782.42	1.41438	0.641509	53	upstream oil
Kazakhstan	KAZ	6724	47.4281	53.2344	0.0148195	1896.23	1.85897	0.631746	315	upstream oil
Russian Federation	RUS	9012	61.8128	77.2304	0.014811	1826.36	2.57946	0.60355	169	upstream oil
Russian Federation	RUS	8814	67.8937	75.7672	0.0148104	1705.48	1.16431	0.65896	173	upstream gas
Russian Federation	RUS	9037	66.4135	77.3481	0.0147967	1564.06	1.6015	0.106122	245	upstream gas
Russian Federation	RUS	9220	66.6709	80.5612	0.0147732	1889.11	2.20239	0.445205	146	upstream oil
United States	USA	2446	31.6445	-101.768	0.0147673	1766.64	2.3847	0.0892857	336	upstream oil
Russian Federation	RUS	6530	51.0928	46.2574	0.0147241	1913.4	1.75947	0.682692	208	upstream oil
India	IND	10471	27.5352	95.4007	0.0147238	1833.73	2.0506	0.573248	157	upstream oil
United States	USA	2098	31.5045	-102.641	0.0147194	1839	1.58803	0.222552	337	upstream oil
Malaysia	MYS	11326	5.55044	104.773	0.0147109	1794.71	1.66795	0.423729	59	upstream oil
Russian Federation	RUS	8794	64.4489	75.6176	0.0147017	1884.52	2.43737	0.573427	143	upstream oil
Trinidad and Tobago	TTO	4307	10.1401	-60.9932	0.0146875	1856.11	1.36145	0.637037	135	upstream oil
Venezuela	VEN	4254	9.7232	-63.4819	0.0146792	2011.13	3.781	0.517857	168	upstream oil
United States	USA	2595	32.4576	-101.471	0.0146788	1828.66	2.40511	0.199396	331	upstream oil
United States	USA	2975	28.5345	-98.4409	0.0146753	1866.97	1.94649	0.417808	292	upstream oil
Russian Federation	RUS	10328	55.2525	106.058	0.0146547	1357.67	1.6015	0.144737	228	upstream gas
Egypt	EGY	5672	30.5055	25.9186	0.0146349	1830.56	1.07908	0.299213	381	upstream oil
Russian Federation	RUS	9061	62.0624	77.5443	0.0146278	1824.33	1.53252	0.746753	154	upstream oil
Vietnam	VNM	11358	9.46687	107.954	0.014624	1803.36	2.74333	0.324324	74	upstream oil
Russian Federation	RUS	6285	63.2464	56.383	0.0146002	1856.25	2.28314	0.59589	146	upstream oil
Iran	IRN	7679	29.07	49.477	0.0145881	1687.3	2.07472	0.708207	329	upstream oil
Russian Federation	RUS	9084	64.473	77.8389	0.014588	1692.33	1.73363	0.725352	142	upstream oil
Syria	SYR	7078	35.3475	39.7733	0.0145429	1836.43	2.10173	0.647929	338	upstream oil
Egypt	EGY	5710	30.8166	27.2714	0.0145372	1816.9	1.20125	0.34072	361	upstream oil
Indonesia	IDN	11583	-6.21788	107.326	0.0145363	1631.57	1.40128	0.774194	31	upstream oil
Pakistan	PAK	9717	25.3842	68.5819	0.0145193	1782.3	1.51614	0.751479	338	upstream oil
Argentina	ARG	4491	-36.9863	-69.394	0.0145096	1744.5	1.70198	0.679128	321	upstream oil
Nigeria	NGA	5871	5.14359	6.92038	0.0145023	1785.19	0.727292	0.697368	76	upstream oil
Indonesia	IDN	11668	-0.141826	117.368	0.014463	1764.73	1.6015	0.75	40	upstream oil
Saudi Arabia	SAU	7564	24.1185	49.1173	0.0144561	1773.4	2.24954	0.57967	364	upstream oil
Iran	IRN	7500	31.2166	48.497	0.0144232	1747.21	2.39022	0.262048	332	upstream oil
Nigeria	NGA	5921	4.44161	6.36153	0.0144023	1737.17	1.04911	0.222222	108	upstream oil
India	IND	10451	27.0325	94.8896	0.0143987	1794.27	2.19448	0.739394	165	upstream oil
Mexico	MEX	3726	19.3938	-92.0275	0.0143898	1517.62	1.6015	0.610465	172	upstream oil
United States	USA	16	70.3068	-148.854	0.0143875	1860.09	1.6015	0.668342	199	upstream oil
Malaysia	MYS	11314	7.20494	103.806	0.0143853	1542.94	1.40647	0.746479	71	upstream oil
Egypt	EGY	7036	27.8049	33.5781	0.0143704	1813.89	1.88892	0.533333	360	upstream oil
Uzbekistan	UZB	9677	38.5063	65.987	0.0143672	1766.6	1.61425	0.736842	342	upstream oil
Congo	COG	6125	-5.04646	11.554	0.0143664	1918.28	3.05816	0.736842	57	upstream oil
Russian Federation	RUS	8826	64.4658	75.8871	0.0143637	1695.69	1.19533	0.471545	123	upstream gas
Russian Federation	RUS	6834	52.1278	55.1898	0.0143632	1903.02	1.55208	0.704142	169	upstream oil
Indonesia	IDN	11596	-6.37926	108.111	0.0143564	1904.26	2.65813	0.53125	32	upstream oil
United States	USA	564	47.8635	-103.484	0.0143524	1904.88	1.6015	0.701681	238	upstream oil
United States	USA	637	48.0522	-103.216	0.014321	1913.17	2.75838	0.311284	257	upstream oil
United States	USA	919	47.9349	-102.717	0.0142957	1925.07	2.54837	0.646617	266	upstream oil
Mexico	MEX	3638	18.5177	-93.368	0.014293	1830.15	0.781736	0.464968	157	upstream oil
Vietnam	VNM	11359	9.98472	107.96	0.0142608	1873.93	2.41738	0.727273	77	upstream oil
Venezuela	VEN	4158	9.59993	-63.6955	0.0142597	2055.57	3.06322	0.503185	157	upstream oil
Kuwait	KWT	7391	29.8986	47.7247	0.0142308	1767.91	1.36403	0.370482	332	upstream oil
Congo	COG	6169	-4.53541	12.1014	0.0142259	1708.67	1.88504	0.645833	48	upstream oil
Nigeria	NGA	5980	4.10646	7.62494	0.0142235	1635.99	1.9607	0.459459	37	upstream oil
United States	USA	2522	31.6382	-101.653	0.014185	1775.87	1.6015	0.0835821	335	upstream oil
India	IND	10477	27.4611	95.4769	0.0141835	1792.5	1.53469	0.695122	164	upstream oil
China	CHN	11198	38.7263	118.842	0.0141721	1785.34	2.00656	0.687259	259	upstream oil
Norway	NOR	4953	61.2951	1.90302	0.0141623	1725.42	1.6015	0.764706	102	upstream oil
Nigeria	NGA	5973	4.84324	7.25475	0.0141528	1624.21	0.634683	0.467532	77	upstream oil
Russian Federation	RUS	9197	66.5997	80.4188	0.01413	1593.7	0.803676	0.643478	115	upstream oil
United States	USA	1397	31.9696	-103.89	0.0141212	1918.7	2.27267	0.585443	316	upstream oil
Mexico	MEX	3621	18.1582	-93.8895	0.0141049	1752.24	1.82167	0.427835	194	upstream oil
United States	USA	1052	47.9137	-102.443	0.014095	1963.65	1.30484	0.642857	210	upstream oil
Oman	OMN	8324	19.2599	56.4658	0.0140944	1842.07	1.89082	0.70088	341	upstream oil
Russian Federation	RUS	6305	67.1678	56.6912	0.0140922	1750.07	2.45911	0.395683	139	upstream oil
Algeria	DZA	5405	29.0312	7.50065	0.0140724	1723.5	1.44446	0.605978	368	upstream oil
Russian Federation	RUS	8725	62.4132	74.7823	0.0140704	1737.22	3.02235	0.195833	240	upstream oil
United Arab Emirates	ARE	8154	25.4987	54.3073	0.0140392	1573.59	1.32734	0.693009	329	upstream oil
Venezuela	VEN	4179	9.63553	-63.6477	0.0140092	2042.25	1.6015	0.569536	151	upstream oil
Venezuela	VEN	4247	9.67458	-63.5043	0.0139979	1987.68	1.6015	0.575758	165	upstream oil
Russian Federation	RUS	9174	67.8395	80.2192	0.0139871	1569.05	1.6015	0.175627	279	upstream oil
Egypt	EGY	7018	28.8685	33.1784	0.0139801	1701.65	1.08752	0.856338	355	upstream oil
Iran	IRN	7911	30.0666	50.8951	0.013973	1570.81	1.21343	0.897833	323	upstream oil
Tunisia	TUN	5486	31.494	9.49348	0.0139721	1743.52	1.26079	0.829517	393	upstream oil
Russian Federation	RUS	9264	67.795	83.5325	0.013961	1850.02	1.02323	0.632979	188	upstream oil
United Arab Emirates	ARE	8102	23.8256	53.6094	0.0139516	1799.04	4.64005	0.684211	361	upstream oil
India	IND	10446	26.7938	94.6902	0.0139427	1810.37	2.31301	0.679348	184	upstream oil
Venezuela	VEN	4118	8.85393	-64.2849	0.0139403	1712.68	1.6015	0.226994	163	upstream oil
Russian Federation	RUS	6843	51.664	55.3959	0.0139335	1244.89	0.462098	0.805	200	upstream oil
Russian Federation	RUS	8704	63.2368	74.5577	0.013918	1810	1.6015	0.333333	210	upstream oil
Kuwait	KWT	7435	28.8742	47.9533	0.0138901	1742.21	2.13137	0.743516	347	upstream oil
Mexico	MEX	3693	18.4544	-92.784	0.013872	1843.16	1.51416	0.738693	199	upstream gas
Iraq	IRQ	7336	31.6694	47.456	0.0138701	1449.36	1.6015	0.623794	311	upstream oil
Iran	IRN	7997	26.776	52.1532	0.013832	1786.54	1.7005	0.778816	321	upstream oil
Brazil	BRA	4797	-21.9931	-39.7399	0.0137984	1765.17	2.28027	0.748503	167	upstream oil
Egypt	EGY	7009	28.5424	32.9331	0.0137937	1699.71	1.10039	0.828652	356	upstream oil
Argentina	ARG	4548	-38.4168	-68.7419	0.0137762	1785.81	1.68769	0.481366	322	upstream oil
Congo	COG	6157	-4.48314	12.0382	0.0137683	1753.18	1.54807	0.506849	73	upstream oil
Russian Federation	RUS	8969	67.7857	77.0157	0.0137632	1436.4	1.36427	0.545455	143	upstream gas
Argentina	ARG	4585	-38.4549	-68.4943	0.013746	1709.67	2.2388	0.246106	321	upstream oil
Indonesia	IDN	11456	0.810681	101.345	0.0137421	1819.12	1.56554	0.677419	31	upstream oil
China	CHN	9348	41.7371	81.1417	0.0137325	1745.72	0.954281	0.53405	279	upstream oil
Turkmenistan	TKM	8070	39.4602	52.7811	0.0137256	1838.93	2.15477	0.716049	243	upstream oil
Russian Federation	RUS	6348	66.5422	57.5361	0.0137156	1887.11	2.88824	0.529412	153	upstream oil
Nigeria	NGA	5815	5.53853	5.89478	0.0136984	1736.64	1.60776	0.485437	103	upstream oil
Uzbekistan	UZB	9676	38.6843	65.9879	0.0136815	1720.45	1.85783	0.365079	315	upstream oil
Russian Federation	RUS	10322	55.2737	105.931	0.0136814	1398.67	1.6015	0.200935	214	upstream gas
Argentina	ARG	4562	-38.3099	-68.6798	0.013664	1839.58	1.6755	0.227692	325	upstream oil
Iraq	IRQ	7187	35.8121	43.835	0.013655	1822.49	1.06684	0.624642	349	upstream oil
Ecuador	ECU	4324	-0.68618	-77.1474	0.0136378	1853.15	2.41401	0.645833	48	upstream oil
Ecuador	ECU	4389	0.081027	-76.7164	0.0136094	1958.1	1.93222	0.607843	51	upstream oil
United Kingdom	GBR	4918	58.2891	0.199476	0.0135958	1757.57	1.96277	0.491803	122	upstream oil
Congo	COG	6128	-5.01616	11.6161	0.013578	1834.17	1.6015	0.172414	58	upstream oil
China	CHN	11244	38.1203	119.492	0.0135662	1684.82	1.46653	0.719008	242	upstream oil
Venezuela	VEN	4175	9.62606	-63.6634	0.0135535	1924.07	1.6015	0.577922	154	upstream oil
Russian Federation	RUS	6589	52.6394	50.5144	0.0135474	1835.13	1.78131	0.723164	177	upstream oil
Syria	SYR	7134	37.0253	42.2711	0.0135437	1842.08	1.64557	0.586319	307	upstream oil
Indonesia	IDN	11521	-2.88803	103.921	0.0135381	1803.59	2.02139	0.3	10	upstream oil
Indonesia	IDN	11491	-2.53772	103.383	0.013507	1738.24	1.27517	0.833333	12	upstream oil
United States	USA	622	48.0243	-103.29	0.0135029	1881.42	2.7088	0.569038	239	upstream oil
United States	USA	1733	32.2169	-103.524	0.0134981	1498	1.712	0.748408	314	upstream oil
Iran	IRN	7790	30.2622	50.154	0.0134445	1852.64	2.01403	0.567073	328	upstream oil
Iran	IRN	7832	30.1502	50.4789	0.013432	1772.36	1.70928	0.393082	318	upstream oil
United States	USA	977	47.737	-102.625	0.0134267	1881.17	2.13018	0.552632	266	upstream oil
Iran	IRN	8011	26.6366	52.2228	0.0133962	1717.06	1.51434	0.635514	321	upstream oil
Colombia	COL	4428	4.08035	-73.3804	0.0133665	1846.72	1.32309	0.547619	42	upstream oil
United Kingdom	GBR	4938	60.8051	1.4472	0.013356	1754.29	1.37789	0.55914	93	upstream oil
Indonesia	IDN	11579	-6.13463	107.028	0.0133547	1808.98	3.57211	0.486486	37	upstream oil
Iran	IRN	7531	31.2219	48.9789	0.0133458	1741.12	1.6015	0.498498	333	upstream oil
Argentina	ARG	4522	-38.4663	-69.049	0.0133447	1749.25	1.45667	0.719595	296	upstream oil
Angola	AGO	6132	-5.36846	11.6626	0.0133255	1675.07	1.58584	0.742424	66	upstream oil
United States	USA	505	47.9675	-104.059	0.0133199	1938.6	2.11436	0.389764	254	upstream oil
Russian Federation	RUS	8866	57.6784	76.3005	0.0133132	1852.04	2.21424	0.607143	224	upstream oil
Brazil	BRA	4655	-2.744	-58.1845	0.0133118	1867.71	1.57216	0.591549	71	upstream gas
Ecuador	ECU	4390	0.171703	-76.7086	0.0132914	1883.35	1.4145	0.64	50	upstream oil
Russian Federation	RUS	10200	58.4038	107.758	0.0132753	1596.18	0.573588	0.79845	129	upstream oil
United Kingdom	GBR	4934	58.6919	1.27876	0.0132689	1791.67	2.00715	0.46087	115	upstream oil
Gabon	GAB	6064	-2.07216	9.80814	0.0132669	1708.01	1.70504	0.483871	62	upstream oil
China	CHN	9380	40.3972	82.676	0.0132448	1856.67	1.37218	0.430464	302	upstream oil
United States	USA	3059	28.8742	-98.0063	0.0132321	1949.45	2.64509	0.543046	302	upstream oil
United States	USA	2332	32.4383	-101.947	0.0132151	1876.22	1.76669	0.546269	335	upstream oil
Oman	OMN	8320	22.346	56.4342	0.0131899	1770.2	1.6015	0.616022	362	upstream oil
United States	USA	809	48.1125	-102.886	0.0131896	1924.36	1.89858	0.585586	222	upstream oil
Egypt	EGY	5718	30.7185	27.6748	0.0131879	1801.28	1.15859	0.374317	366	upstream oil
Sudan	SDN	5895	10.9231	28.5669	0.0131835	1841.16	1.80207	0.381188	202	upstream oil
Indonesia	IDN	11634	-6.65859	112.918	0.0131705	1775.15	1.25312	0.77551	49	upstream oil
Russian Federation	RUS	9108	60.8013	78.5371	0.0131666	1913.88	2.00039	0.57754	187	upstream oil
Russian Federation	RUS	6283	66.7658	56.186	0.0131661	1760.11	1.50742	0.54878	164	upstream oil
Nigeria	NGA	5824	5.32751	6.24165	0.0131514	1738.2	1.8804	0.578313	83	upstream oil
Indonesia	IDN	11548	-3.3335	104.36	0.0131331	1893.7	1.6015	0.571429	14	upstream oil
United States	USA	1188	32.6309	-104.472	0.0131309	1845.45	1.47137	0.294498	309	upstream oil
Nigeria	NGA	5933	4.54946	6.66601	0.013129	1743.04	1.99446	0.423077	78	upstream oil
Kazakhstan	KAZ	6887	47.9059	56.4978	0.0131228	1942.22	1.32309	0.546125	271	upstream oil
United Kingdom	GBR	4940	59.6088	1.51249	0.0131063	1827.47	1.34823	0.622449	98	upstream oil
Angola	AGO	6127	-7.46087	11.5686	0.0131038	1533.88	2.53697	0.126437	87	upstream oil
Argentina	ARG	4553	-38.4101	-68.7162	0.0130947	1729.98	1	0.551613	310	upstream oil
Russian Federation	RUS	8630	60.7804	72.863	0.0130597	1799.84	2.01344	0.742081	221	upstream oil
Mozambique	MOZ	8371	-11.2197	41.1558	0.0130077	1483.36	1.6015	0.414747	217	upstream oil
Oman	OMN	8367	19.9168	58.085	0.0129946	1801.92	1.70522	0.530945	307	upstream oil
Ecuador	ECU	4341	-0.642922	-76.8852	0.0129795	1951.78	2.51124	0.54717	53	upstream oil
Iraq	IRQ	7214	32.8397	44.2927	0.0129792	1580	1.24186	0.527221	349	upstream oil
Nigeria	NGA	5987	4.24263	7.79432	0.0129451	1653.76	0.822388	0.25	44	upstream oil
Russian Federation	RUS	10177	58.4075	107.265	0.012915	1564.12	0.407331	0.791411	163	upstream oil
Indonesia	IDN	11586	-5.89467	107.495	0.0128964	1649.51	1.93513	0.75	28	upstream oil
Venezuela	VEN	4104	8.44228	-64.6536	0.0128629	1809.83	1.67882	0.574627	134	upstream oil
Russian Federation	RUS	8654	61.8359	73.573	0.0128442	1785.15	1.81913	0.679487	156	upstream oil
Brazil	BRA	4778	-22.6344	-40.0925	0.0128401	1800.12	4.14628	0.19774	177	upstream oil
United States	USA	688	47.6538	-103.076	0.0128395	1907.75	1.28395	0.366906	278	upstream oil
United States	USA	3081	28.9606	-97.9069	0.0128253	1883.3	1.98845	0.439189	296	upstream oil
Indonesia	IDN	11524	-3.90016	103.996	0.0128182	1848.9	1.77521	0.583333	12	upstream oil
United States	USA	2199	31.6428	-102.192	0.0128079	1808.97	1.89245	0.72327	318	upstream oil
Russian Federation	RUS	9255	67.5167	83.21	0.0128057	1253.93	0.736637	0.712042	191	upstream oil
Russian Federation	RUS	8679	62.3491	73.9437	0.0128036	1786.12	3.67432	0.251208	207	upstream oil
Saudi Arabia	SAU	7768	26.7881	50.0177	0.0127947	1711.77	2.17324	0.56875	320	upstream oil
Indonesia	IDN	11496	-1.21552	103.419	0.0127892	1897.79	1.35144	0.685714	35	upstream oil
Ecuador	ECU	4407	0.300242	-76.2982	0.0127839	1939.24	3.22983	0.589286	56	upstream oil
Malaysia	MYS	11340	5.51966	105.672	0.0127766	1787.72	2.08437	0.535714	56	upstream oil
Iran	IRN	7821	30.1803	50.4095	0.0127602	1781.6	1.22978	0.366771	319	upstream oil
Russian Federation	RUS	10330	55.2875	106.092	0.0127567	1288.12	0.556117	0.269058	223	upstream gas
Nigeria	NGA	5915	4.66121	6.07745	0.0127444	1722.62	0.864399	0.113208	106	upstream oil
Brazil	BRA	4738	-25.6035	-42.8209	0.0127422	1691.41	1.57483	0.509934	151	upstream oil
Iran	IRN	7983	27.9433	52.0755	0.0127305	1799.13	4.24286	0.44713	331	upstream oil
Egypt	EGY	7016	28.9694	33.1314	0.0127173	1782.59	1.59384	0.831858	339	upstream oil
Democratic Republic of the Congo	COD	6187	-5.87455	12.3386	0.0127013	1742.2	1.47153	0.607595	79	upstream oil
Ecuador	ECU	4337	-0.57128	-76.9038	0.0126968	1890.47	1.4203	0.603448	58	upstream oil
Russian Federation	RUS	8667	60.3342	73.7238	0.0126899	1682.07	1.6015	0.269737	152	upstream oil
Colombia	COL	4405	0.347768	-76.4919	0.0126746	1887.72	2.26213	0.545455	55	upstream oil
Angola	AGO	6177	-5.38788	12.1956	0.0126737	1827.19	1.84944	0.619048	63	upstream oil
Iraq	IRQ	7300	31.0108	47.3185	0.0126652	1654.2	1.6015	0.498433	319	upstream oil
Russian Federation	RUS	6368	68.4867	58.7541	0.0126383	1732.66	1.64322	0.504673	107	upstream oil
Ecuador	ECU	4399	-0.376359	-76.6339	0.012629	1735.88	0.967884	0.62963	54	upstream oil
Malaysia	MYS	11320	5.22484	104.436	0.0126199	1910.02	1.46138	0.740741	54	upstream oil
Indonesia	IDN	11607	-6.30138	108.633	0.0126174	1688.25	2.61891	0.705882	17	upstream oil
Malaysia	MYS	11414	5.82599	114.34	0.0126127	1587.7	1.36206	0.571429	35	upstream oil
Iraq	IRQ	7366	30.5067	47.6065	0.0126094	1976.3	2.95276	0.531353	303	upstream oil
Russian Federation	RUS	10038	60.4271	96.4709	0.0126094	1863.46	1.6015	0.38806	134	upstream oil
Gabon	GAB	6037	-1.2365	8.74144	0.0125743	1856.31	1.6015	0.574074	54	upstream oil
Kazakhstan	KAZ	9308	45.8303	66.1386	0.0125674	1820.29	1.27656	0.643258	356	upstream oil
Russian Federation	RUS	6712	53.3961	53.0749	0.0125661	1796.76	0.689633	0.755725	131	upstream oil
United States	USA	8	70.2869	-149.884	0.0125641	1837.78	1.6015	0.732601	273	upstream oil
Thailand	THA	11276	16.5655	99.9118	0.0125601	1819.33	1.83863	0.671141	149	upstream oil
Cameroon	CMR	6017	4.30296	8.5004	0.0125588	1772.68	1.34407	0.483871	31	upstream oil
Kazakhstan	KAZ	9289	46.6451	64.4637	0.0125439	1940.91	1.89037	0.438272	324	upstream oil
Russian Federation	RUS	6353	66.0651	57.8215	0.0125388	1781.14	1.5118	0.627027	185	upstream oil
Indonesia	IDN	11680	3.85366	117.581	0.0125246	1919.65	2.10381	0.510638	47	upstream oil
United States	USA	1510	31.2696	-103.726	0.0125009	1860.71	1.60802	0.3003	333	upstream oil
Turkmenistan	TKM	9664	38.0752	65.7651	0.0124559	1809.24	2.09313	0.672619	336	upstream oil
Venezuela	VEN	4185	9.67662	-63.6353	0.0124381	2044.91	2.50675	0.396104	154	upstream oil
[truncated: 7,042 more rows]

## Sheet: Table 5 GOM block
OBJECTID	BLK_NUM	RGN_CODE	PROT_NUM	PROT_NAME	BLK_FED_AP	DSPUT_FED_	NON_200_AR	OTHER_FED_	SECT_8G_AR	MPA_AREA	TOT_AREA	ST_AREA	CATG_CODE	UNEN_FED_A	TOT_FED_AR	NON_USA_AR	DSPUT_8G_A	CONFIG_FLA	FED_200_AR	REMARK	AREA_UNITS	PROT_APRV_	SHAPE_Leng	SHAPE_Area	geometry
1	6582	G	NH15-10	Bay City	44866	0	0	0	0	0	2304	0	0	2304	2304	0	0	1	0	NA	1	44866	0.184682	0.00212358	list(c(-94.513627, -94.519753, -94.51983, -94.519908, -94.519985, -94.520063, -94.52014, -94.520218, -94.520296, -94.520373, -94.514244, -94.508116, -94.501987, -94.495858, -94.489729, -94.4836, -94.477471, -94.471342, -94.471267, -94.471192, -94.471117, -94.471042, -94.470967, -94.470892, -94.470817, -94.470742, -94.476869, -94.482995, -94.489121, -94.495248, -94.501374, -94.5075, -94.513627, 28…
2	6761	G	NH15-12	Ewing Bank	44866	0	0	0	0	0	2304	0	0	2304	2304	0	0	1	0	NA	1	44866	0.184526	0.00212018	list(c(-91.482638, -91.482714, -91.488831, -91.494947, -91.501064, -91.50718, -91.513296, -91.519413, -91.525529, -91.531646, -91.531571, -91.531497, -91.531423, -91.531348, -91.531274, -91.5312, -91.531125, -91.531051, -91.524932, -91.518813, -91.512694, -91.506575, -91.500456, -91.494337, -91.488218, -91.4821, -91.482177, -91.482253, -91.48233, -91.482407, -91.482484, -91.482561, -91.482638, 28…
3	6789	G	NH15-10	Bay City	44866	0	0	0	0	0	2304	0	0	2304	2304	0	0	1	0	NA	1	44866	0.184547	0.00212069	list(c(-94.168623, -94.17474, -94.1748, -94.174859, -94.174919, -94.174978, -94.175038, -94.175097, -94.175157, -94.175216, -94.169096, -94.162977, -94.156857, -94.150737, -94.144617, -94.138497, -94.132377, -94.126257, -94.1262, -94.126143, -94.126086, -94.126029, -94.125972, -94.125915, -94.125858, -94.125801, -94.131918, -94.138036, -94.144153, -94.150271, -94.156388, -94.162505, -94.168623, 2…
4	6584	G	NH15-10	Bay City	44866	0	0	0	0	0	2304	0	0	2304	2304	0	0	1	0	NA	1	44866	0.184689	0.00212372	list(c(-94.415603, -94.42173, -94.421802, -94.421875, -94.421947, -94.42202, -94.422093, -94.422165, -94.422238, -94.42231, -94.416181, -94.410052, -94.403923, -94.397794, -94.391665, -94.385535, -94.379406, -94.373277, -94.373207, -94.373137, -94.373067, -94.372997, -94.372927, -94.372857, -94.372787, -94.372717, -94.378843, -94.38497, -94.391097, -94.397223, -94.40335, -94.409477, -94.415603, 2…
5	6983	G	NG15-02	Garden Banks	44866	0	0	0	0	0	2304	0	0	2304	2304	0	0	1	0	NA	1	44866	0.183546	0.00209907	list(c(-92.370366, -92.370396, -92.376449, -92.382503, -92.388557, -92.39461, -92.400664, -92.406718, -92.412771, -92.418825, -92.418797, -92.418769, -92.418741, -92.418713, -92.418685, -92.418657, -92.418629, -92.418601, -92.412545, -92.406489, -92.400433, -92.394377, -92.388321, -92.382265, -92.376209, -92.370153, -92.370183, -92.370214, -92.370244, -92.370275, -92.370305, -92.370335, -92.37036…
6	6141	G	NG15-03	Green Canyon	44866	0	0	0	0	0	2304	0	0	2304	2304	0	0	1	0	NA	1	44866	0.183976	0.0021081	list(c(-90.076212, -90.076066, -90.075921, -90.075776, -90.075631, -90.075486, -90.07534, -90.075195, -90.07505, -90.068962, -90.062875, -90.056788, -90.050701, -90.044614, -90.038527, -90.03244, -90.026354, -90.026501, -90.026649, -90.026797, -90.026944, -90.027092, -90.02724, -90.027387, -90.027535, -90.033619, -90.039704, -90.045788, -90.051873, -90.057957, -90.064042, -90.070127, -90.076212, …
7	6440	G	NH16-10	Mississippi Canyon	44866	0	0	0	0	0	2304	0	0	2304	2304	0	0	1	0	NA	1	44866	0.184826	0.00212673	list(c(-88.122881, -88.129016, -88.129074, -88.129132, -88.12919, -88.129247, -88.129305, -88.129363, -88.129421, -88.129479, -88.123342, -88.117204, -88.111067, -88.104929, -88.098792, -88.092654, -88.086516, -88.080379, -88.080323, -88.080268, -88.080212, -88.080157, -88.080102, -88.080046, -88.079991, -88.079936, -88.086071, -88.092206, -88.098341, -88.104476, -88.110611, -88.116746, -88.12288…
8	6508	G	NH15-10	Bay City	44866	0	0	0	1154.2303877625768	0	2304	0	2	1149.7696122374234	2304	0	0	1	0	NA	1	44866	0.184597	0.00212161	list(c(-95.690476, -95.696599, -95.696737, -95.696875, -95.697012, -95.69715, -95.697288, -95.697425, -95.697563, -95.697701, -95.691575, -95.68545, -95.679324, -95.673198, -95.667073, -95.660947, -95.654821, -95.648695, -95.64856, -95.648425, -95.648289, -95.648154, -95.648019, -95.647884, -95.647749, -95.647614, -95.653737, -95.65986, -95.665984, -95.672107, -95.67823, -95.684353, -95.690476, 2…
9	6636	G	NH15-10	Bay City	44866	0	0	0	0	0	2304	0	0	2304	2304	0	0	1	0	NA	1	44866	0.184657	0.00212304	list(c(-94.317038, -94.323163, -94.32323, -94.323297, -94.323365, -94.323432, -94.3235, -94.323567, -94.323634, -94.323702, -94.317575, -94.311448, -94.305321, -94.299194, -94.293067, -94.28694, -94.280813, -94.274686, -94.274621, -94.274556, -94.274491, -94.274426, -94.274361, -94.274297, -94.274232, -94.274167, -94.280291, -94.286416, -94.292541, -94.298665, -94.304789, -94.310914, -94.317038, …
10	6960	G	NG15-03	Green Canyon	44866	0	0	0	0	0	2304	0	0	2304	2304	0	0	1	0	NA	1	44866	0.183505	0.00209809	list(c(-91.547221, -91.553272, -91.559324, -91.565376, -91.571428, -91.577479, -91.583531, -91.589583, -91.595635, -91.595567, -91.595499, -91.595432, -91.595364, -91.595296, -91.595229, -91.595161, -91.595093, -91.589039, -91.582985, -91.576931, -91.570877, -91.564823, -91.558769, -91.552714, -91.54666, -91.546731, -91.546801, -91.546871, -91.546941, -91.547011, -91.547081, -91.547151, -91.54722…
11	6871	G	NH15-10	Bay City	44866	0	0	0	0	0	2304	0	0	2304	2304	0	0	1	0	NA	1	44866	0.184399	0.0021174	list(c(-95.047662, -95.053771, -95.053874, -95.053978, -95.054082, -95.054185, -95.054289, -95.054392, -95.054496, -95.0546, -95.048488, -95.042376, -95.036265, -95.030153, -95.024041, -95.017929, -95.011818, -95.005706, -95.005604, -95.005503, -95.005402, -95.005301, -95.0052, -95.005099, -95.004998, -95.004896, -95.011006, -95.017115, -95.023225, -95.029334, -95.035443, -95.041553, -95.047662, …
12	6571	G	NG15-02	Garden Banks	44866	0	0	0	0	0	2304	0	0	2304	2304	0	0	1	0	NA	1	44866	0.183853	0.00210571	list(c(-92.951415, -92.951417, -92.95749, -92.963563, -92.969636, -92.975709, -92.981781, -92.987854, -92.993927, -93, -93, -93, -93, -93, -93, -93, -93, -93, -92.993925, -92.98785, -92.981774, -92.975699, -92.969624, -92.963549, -92.957473, -92.951398, -92.9514, -92.951403, -92.951405, -92.951408, -92.95141, -92.951412, -92.951415, 27.474561, 27.469145, 27.469147, 27.469148, 27.46915, 27.469151,…
13	6386	G	NH16-07	Viosca Knoll	44866	0	0	0	0	0	2304	0	0	2304	2304	0	0	1	0	NA	1	44866	0.185798	0.00214771	list(c(-88.282948, -88.289145, -88.289214, -88.289283, -88.289352, -88.289421, -88.28949, -88.289559, -88.289628, -88.289697, -88.283498, -88.277299, -88.271099, -88.2649, -88.258701, -88.252502, -88.246302, -88.240103, -88.240037, -88.23997, -88.239904, -88.239837, -88.239771, -88.239705, -88.239638, -88.239572, -88.245769, -88.251965, -88.258162, -88.264359, -88.270555, -88.276752, -88.282948, …
14	6340	G	NH15-11	Bouma Bank	44866	0	0	0	0	0	2304	0	0	2304	2304	0	0	1	0	NA	1	44866	0.184915	0.00212861	list(c(-92.017371, -92.017421, -92.023561, -92.029702, -92.035842, -92.041983, -92.048123, -92.054264, -92.060404, -92.066545, -92.066497, -92.066448, -92.0664, -92.066352, -92.066304, -92.066256, -92.066208, -92.06616, -92.060017, -92.053874, -92.047731, -92.041588, -92.035445, -92.029302, -92.023159, -92.017016, -92.017067, -92.017118, -92.017168, -92.017219, -92.017269, -92.01732, -92.017371, …
15	6683	G	NG15-01	East Breaks	44866	0	0	0	0	0	2304	0	0	2304	2304	0	0	1	0	NA	1	44866	0.183722	0.00210285	list(c(-94.456728, -94.456656, -94.456585, -94.456514, -94.456443, -94.456372, -94.456302, -94.456231, -94.45616, -94.462225, -94.468291, -94.474357, -94.480423, -94.486488, -94.492554, -94.498619, -94.504685, -94.504758, -94.504832, -94.504905, -94.504978, -94.505052, -94.505125, -94.505198, -94.505272, -94.499204, -94.493136, -94.487068, -94.481, -94.474932, -94.468864, -94.462796, -94.456728, …
16	6417	G	NG15-03	Green Canyon	44866	0	0	0	0	0	2304	0	0	2304	2304	0	0	1	0	NA	1	44866	0.183887	0.00210634	list(c(-91.200587, -91.200676, -91.206752, -91.212829, -91.218905, -91.224981, -91.231058, -91.237134, -91.243211, -91.249288, -91.249201, -91.249115, -91.249029, -91.248943, -91.248857, -91.248771, -91.248685, -91.248599, -91.24252, -91.236441, -91.230362, -91.224283, -91.218204, -91.212125, -91.206047, -91.199968, -91.200056, -91.200145, -91.200234, -91.200322, -91.200411, -91.200499, -91.20058…
17	7124	G	NH15-10	Bay City	44866	0	0	0	0	0	2304	0	0	2304	2304	0	0	1	0	NA	1	44866	0.18422	0.00211356	list(c(-94.897221, -94.903319, -94.903414, -94.903509, -94.903604, -94.903699, -94.903794, -94.90389, -94.903985, -94.90408, -94.89798, -94.89188, -94.88578, -94.879679, -94.873579, -94.867479, -94.861379, -94.855279, -94.855186, -94.855093, -94.855, -94.854907, -94.854815, -94.854722, -94.854629, -94.854537, -94.860635, -94.866732, -94.87283, -94.878928, -94.885026, -94.891123, -94.897221, 27.97…
18	6620	G	NH15-11	Bouma Bank	44866	0	0	0	0	0	2304	0	0	2304	2304	0	0	1	0	NA	1	44866	0.184698	0.002124	list(c(-93.042885, -93.049011, -93.049014, -93.049016, -93.049019, -93.049021, -93.049024, -93.049026, -93.049029, -93.049031, -93.042902, -93.036774, -93.030645, -93.024516, -93.018387, -93.012258, -93.006129, -93, -93, -93, -93, -93, -93, -93, -93, -93, -93.006126, -93.012253, -93.018379, -93.024506, -93.030632, -93.036759, -93.042885, 28.422436, 28.422434, 28.42785, 28.433266, 28.438682, 28.44…
19	6968	G	NH16-10	Mississippi Canyon	44866	0	0	0	0	0	2304	0	0	2304	2304	0	0	1	0	NA	1	44866	0.184306	0.00211535	list(c(-89.19251, -89.198613, -89.198724, -89.198834, -89.198945, -89.199055, -89.199166, -89.199276, -89.199387, -89.199497, -89.193391, -89.187285, -89.181179, -89.175073, -89.168967, -89.162861, -89.156754, -89.150648, -89.15054, -89.150432, -89.150324, -89.150216, -89.150108, -89.15, -89.149892, -89.149784, -89.155888, -89.161991, -89.168095, -89.174199, -89.180302, -89.186406, -89.19251, 28.…
20	6804	G	NH15-08	Port Arthur	44866	0	0	0	0	0	2304	0	0	2304	2304	0	0	1	0	NA	1	44866	0.185448	0.00214015	list(c(-93.839739, -93.839783, -93.839827, -93.839871, -93.839916, -93.83996, -93.840004, -93.840048, -93.840093, -93.833916, -93.827739, -93.821563, -93.815386, -93.80921, -93.803033, -93.796856, -93.79068, -93.790638, -93.790596, -93.790554, -93.790513, -93.790471, -93.79043, -93.790388, -93.790346, -93.79652, -93.802694, -93.808869, -93.815043, -93.821217, -93.827391, -93.833565, -93.839739, 2…
21	6490	G	NH16-07	Viosca Knoll	44866	0	0	0	0	0	2304	0	0	2304	2304	0	0	1	0	NA	1	44866	0.185726	0.00214615	list(c(-88.083724, -88.089916, -88.089974, -88.090032, -88.09009, -88.090148, -88.090207, -88.090265, -88.090323, -88.090381, -88.084187, -88.077992, -88.071798, -88.065603, -88.059409, -88.053214, -88.04702, -88.040825, -88.04077, -88.040714, -88.040659, -88.040603, -88.040548, -88.040492, -88.040437, -88.040381, -88.046573, -88.052765, -88.058957, -88.065149, -88.071341, -88.077532, -88.083724,…
22	6239	G	NH16-07	Viosca Knoll	44866	0	0	0	0	0	2304	0	0	2304	2304	0	0	1	0	NA	1	44866	0.185932	0.00215062	list(c(-88.135687, -88.141892, -88.141953, -88.142015, -88.142076, -88.142138, -88.142199, -88.142261, -88.142322, -88.142384, -88.136176, -88.129968, -88.123761, -88.117553, -88.111346, -88.105138, -88.09893, -88.092723, -88.092664, -88.092605, -88.092546, -88.092487, -88.092428, -88.09237, -88.092311, -88.092252, -88.098457, -88.104662, -88.110867, -88.117072, -88.123277, -88.129482, -88.135687…
23	6441	G	NG14-03	Corpus Christi	44866	0	0	0	0	0	2304	0	0	2304	2304	0	0	1	0	NA	1	44866	0.183748	0.00210319	list(c(-96.083129, -96.082986, -96.082843, -96.082699, -96.082556, -96.082413, -96.082269, -96.082126, -96.081982, -96.07591, -96.069837, -96.063764, -96.057692, -96.051619, -96.045546, -96.039474, -96.033401, -96.033547, -96.033693, -96.033839, -96.033984, -96.03413, -96.034276, -96.034421, -96.034567, -96.040637, -96.046707, -96.052777, -96.058848, -96.064918, -96.070988, -96.077059, -96.083129…
24	6555	G	NH16-10	Mississippi Canyon	44866	0	0	0	0	0	2304	0	0	2304	2304	0	0	1	0	NA	1	44866	0.184539	0.00212029	list(c(-89.836263, -89.842383, -89.842528, -89.842672, -89.842817, -89.842962, -89.843107, -89.843252, -89.843397, -89.843542, -89.83742, -89.831297, -89.825175, -89.819053, -89.812931, -89.806808, -89.800686, -89.794564, -89.794421, -89.794279, -89.794136, -89.793994, -89.793851, -89.793709, -89.793567, -89.793425, -89.799545, -89.805664, -89.811784, -89.817904, -89.824024, -89.830144, -89.83626…
25	7039	G	NH16-07	Viosca Knoll	44866	0	0	0	0	0	2304	0	0	2304	2304	0	0	1	0	NA	1	44866	0.185269	0.0021363	list(c(-88.128007, -88.13417, -88.134229, -88.134288, -88.134348, -88.134407, -88.134466, -88.134526, -88.134585, -88.134645, -88.128479, -88.122313, -88.116148, -88.109982, -88.103817, -88.097651, -88.091485, -88.08532, -88.085263, -88.085206, -88.085149, -88.085092, -88.085036, -88.084979, -88.084922, -88.084866, -88.091029, -88.097192, -88.103355, -88.109518, -88.115681, -88.121844, -88.128007…
26	6788	G	NH14-12	Beeville	44866	0	0	0	1985.7479713403527	0	2304	0	2	318.2520286596593	2304.000000000012	0	0	1	0	NA	1	44866	0.184384	0.00211692	list(c(-96.162083, -96.162226, -96.168336, -96.174446, -96.180556, -96.186666, -96.192776, -96.198886, -96.204996, -96.211106, -96.210965, -96.210824, -96.210683, -96.210542, -96.2104, -96.210259, -96.210118, -96.209977, -96.203864, -96.197752, -96.191639, -96.185527, -96.179415, -96.173302, -96.16719, -96.161078, -96.161222, -96.161365, -96.161509, -96.161652, -96.161796, -96.161939, -96.162083,…
27	6419	G	NH15-11	Bouma Bank	44866	0	0	0	0	0	2304	0	0	2304	2304	0	0	1	0	NA	1	44866	0.184857	0.00212741	list(c(-93.092047, -93.098183, -93.098188, -93.098193, -93.098198, -93.098203, -93.098208, -93.098213, -93.098218, -93.098223, -93.092084, -93.085945, -93.079807, -93.073668, -93.067529, -93.06139, -93.055251, -93.049112, -93.049109, -93.049107, -93.049104, -93.049102, -93.049099, -93.049097, -93.049094, -93.049092, -93.055228, -93.061364, -93.067501, -93.073637, -93.079774, -93.08591, -93.092047…
28	6840	G	NG14-06	Port Isabel	44866	0	0	0	0	0	2304	0	0	2304	2304	0	0	1	0	NA	1	44866	0.18263	0.00207902	list(c(-96.11729, -96.117423, -96.123423, -96.129422, -96.135421, -96.141421, -96.14742, -96.15342, -96.159419, -96.165419, -96.165288, -96.165156, -96.165025, -96.164894, -96.164762, -96.164631, -96.164499, -96.164367, -96.158366, -96.152364, -96.146362, -96.140361, -96.134359, -96.128357, -96.122356, -96.116354, -96.116488, -96.116622, -96.116755, -96.116889, -96.117023, -96.117156, -96.11729, …
29	7119	G	NH15-10	Bay City	44866	0	0	0	0	0	2304	0	0	2304	2304	0	0	1	0	NA	1	44866	0.184197	0.00211299	list(c(-95.141105, -95.147202, -95.147309, -95.147416, -95.147524, -95.147631, -95.147738, -95.147846, -95.147953, -95.148061, -95.141962, -95.135863, -95.129764, -95.123665, -95.117566, -95.111466, -95.105367, -95.099268, -95.099163, -95.099058, -95.098953, -95.098848, -95.098743, -95.098639, -95.098534, -95.098429, -95.104526, -95.110622, -95.116719, -95.122816, -95.128912, -95.135009, -95.1411…
30	6052	G	NG15-02	Garden Banks	44866	0	0	0	0	0	2304	0	0	2304	2304	0	0	1	0	NA	1	44866	0.18421	0.00211345	list(c(-93.927047, -93.920948, -93.91485, -93.908752, -93.902653, -93.896555, -93.890456, -93.884358, -93.87826, -93.878216, -93.878172, -93.878128, -93.878084, -93.878041, -93.877997, -93.877953, -93.87791, -93.884006, -93.890102, -93.896198, -93.902294, -93.908389, -93.914485, -93.920581, -93.926677, -93.926723, -93.92677, -93.926816, -93.926862, -93.926908, -93.926954, -93.927001, -93.927047, …
31	6286	G	NH15-10	Bay City	44866	0	0	0	0	0	2304	0	0	2304	2304	0	0	1	0	NA	1	44866	0.184933	0.00212904	list(c(-94.32082, -94.326962, -94.32703, -94.327099, -94.327167, -94.327235, -94.327304, -94.327372, -94.327441, -94.327509, -94.321365, -94.31522, -94.309076, -94.302931, -94.296787, -94.290642, -94.284497, -94.278353, -94.278287, -94.278221, -94.278155, -94.278089, -94.278023, -94.277957, -94.277891, -94.277825, -94.283967, -94.29011, -94.296252, -94.302394, -94.308536, -94.314678, -94.32082, 2…
32	6634	G	NG15-01	East Breaks	44866	0	0	0	0	0	2304	0	0	2304	2304	0	0	1	0	NA	1	44866	0.183766	0.00210372	list(c(-94.456728, -94.456799, -94.45687, -94.456941, -94.457012, -94.457083, -94.457154, -94.457225, -94.457297, -94.451226, -94.445156, -94.439085, -94.433015, -94.426944, -94.420873, -94.414803, -94.408732, -94.408663, -94.408595, -94.408526, -94.408457, -94.408388, -94.408319, -94.408251, -94.408182, -94.41425, -94.420319, -94.426387, -94.432455, -94.438523, -94.444591, -94.450659, -94.456728…
33	6001	G	NG15-02	Garden Banks	44866	0	0	0	0	0	2304	0	0	2304	2304	0	0	1	0	NA	1	44866	0.184249	0.00211422	list(c(-93.927047, -93.933145, -93.939243, -93.945342, -93.95144, -93.957538, -93.963637, -93.969735, -93.975833, -93.975882, -93.97593, -93.975979, -93.976028, -93.976077, -93.976125, -93.976174, -93.976223, -93.970122, -93.964022, -93.957921, -93.95182, -93.945719, -93.939619, -93.933518, -93.927417, -93.927371, -93.927324, -93.927278, -93.927232, -93.927186, -93.927139, -93.927093, -93.927047,…
34	6370	G	NH15-08	Port Arthur	44866	0	0	0	2120.8455373784027	0	2304	183.15446262159745	1	0	2120.8455373784027	0	0	1	0	NA	1	44866	0.176951	0.00197776	list(c(-93, -93.006198, -93.012397, -93.018595, -93.024794, -93.030992, -93.037191, -93.043389, -93.049588, -93.04959, -93.049593, -93.049596, -93.049598, -93.049601, -93.049604, -93.049606, -93.049609, -93.043408, -93.037207, -93.032529, -93.029714, -93.020004, -93.019373, -93, -93, -93, -93, -93, -93, -93, -93, 29.635528, 29.635528, 29.635527, 29.635527, 29.635526, 29.635524, 29.635523, 29.6355…
35	6392	G	NG14-06	Port Isabel	44866	0	0	0	0	0	2304	0	0	2304	2304	0	0	1	0	NA	1	44866	0.182933	0.00208559	list(c(-96.011266, -96.011407, -96.017426, -96.023444, -96.029463, -96.035482, -96.041501, -96.04752, -96.053539, -96.059558, -96.05942, -96.059281, -96.059143, -96.059004, -96.058865, -96.058727, -96.058588, -96.058449, -96.052428, -96.046406, -96.040385, -96.034364, -96.028343, -96.022322, -96.0163, -96.010279, -96.01042, -96.010561, -96.010702, -96.010843, -96.010984, -96.011125, -96.011266, 2…
36	6423	G	NH15-12	Ewing Bank	44866	0	0	0	0	0	2304	0	0	2304	2304	0	0	1	0	NA	1	44866	0.184749	0.00212493	list(c(-90.889543, -90.889651, -90.895783, -90.901914, -90.908045, -90.914177, -90.920308, -90.92644, -90.932571, -90.938703, -90.938597, -90.938492, -90.938386, -90.93828, -90.938175, -90.938069, -90.937963, -90.937857, -90.931723, -90.925589, -90.919455, -90.913321, -90.907187, -90.901053, -90.89492, -90.888786, -90.888894, -90.889002, -90.889111, -90.889219, -90.889327, -90.889435, -90.889543,…
37	6857	G	NH16-10	Mississippi Canyon	44866	0	0	0	0	0	2304	0	0	2304	2304	0	0	1	0	NA	1	44866	0.184319	0.00211556	list(c(-89.731696, -89.737802, -89.73794, -89.738078, -89.738216, -89.738354, -89.738492, -89.73863, -89.738768, -89.738906, -89.732798, -89.72669, -89.720582, -89.714474, -89.708366, -89.702258, -89.69615, -89.690041, -89.689906, -89.68977, -89.689634, -89.689499, -89.689363, -89.689228, -89.689092, -89.688957, -89.695063, -89.701168, -89.707274, -89.71338, -89.719485, -89.725591, -89.731696, 28…
38	6675	G	NG14-03	Corpus Christi	44866	0	0	0	0	0	2304	0	0	2304	2304	0	0	1	0	NA	1	44866	0.183662	0.00210143	list(c(-96.864621, -96.864517, -96.864413, -96.864309, -96.864205, -96.864101, -96.863997, -96.863893, -96.863788, -96.857723, -96.851658, -96.845592, -96.839527, -96.833462, -96.827397, -96.821332, -96.815266, -96.815373, -96.815479, -96.815586, -96.815692, -96.815799, -96.815905, -96.816011, -96.816118, -96.82218, -96.828243, -96.834306, -96.840369, -96.846432, -96.852495, -96.858558, -96.86462…
39	6187	G	NH15-10	Bay City	44866	0	0	0	0	0	2304	0	0	2304	2304	0	0	1	0	NA	1	44866	0.185017	0.00213085	list(c(-94.229703, -94.23585, -94.241997, -94.248145, -94.254292, -94.260439, -94.266587, -94.272734, -94.278881, -94.278947, -94.279013, -94.279079, -94.279146, -94.279212, -94.279278, -94.279344, -94.279411, -94.273261, -94.267111, -94.260961, -94.254811, -94.248662, -94.242512, -94.236362, -94.230212, -94.230148, -94.230085, -94.230021, -94.229957, -94.229894, -94.22983, -94.229766, -94.229703…
40	7011	G	NG15-02	Garden Banks	44866	0	0	0	0	0	2304	0	0	2304	2304	0	0	1	0	NA	1	44866	0.183513	0.00209837	list(c(-93.478078, -93.484129, -93.484153, -93.484176, -93.484199, -93.484222, -93.484246, -93.484269, -93.484292, -93.484316, -93.478262, -93.472208, -93.466154, -93.460101, -93.454047, -93.447993, -93.441939, -93.435885, -93.435864, -93.435843, -93.435822, -93.435801, -93.43578, -93.435759, -93.435738, -93.435718, -93.441769, -93.44782, -93.453872, -93.459923, -93.465975, -93.472026, -93.478078…
41	6283	G	NH15-11	Bouma Bank	44866	0	0	0	0	0	2304	0	0	2304	2304	0	0	1	0	NA	1	44866	0.184968	0.00212981	list(c(-92.360775, -92.360808, -92.360841, -92.360874, -92.360906, -92.360939, -92.360972, -92.361005, -92.361038, -92.367182, -92.373325, -92.379469, -92.385613, -92.391756, -92.3979, -92.404043, -92.410187, -92.410157, -92.410126, -92.410096, -92.410065, -92.410035, -92.410004, -92.409974, -92.409943, -92.403797, -92.397651, -92.391505, -92.385359, -92.379213, -92.373067, -92.366921, -92.360775…
42	7011	G	NG15-03	Green Canyon	44866	0	0	0	0	0	2304	0	0	2304	2304	0	0	1	0	NA	1	44866	0.183464	0.00209724	list(c(-91.547221, -91.541169, -91.535117, -91.529066, -91.523014, -91.516963, -91.510911, -91.504859, -91.498808, -91.49888, -91.498952, -91.499025, -91.499097, -91.499169, -91.499241, -91.499313, -91.499386, -91.505435, -91.511484, -91.517533, -91.523582, -91.529632, -91.535681, -91.54173, -91.54778, -91.54771, -91.54764, -91.54757, -91.5475, -91.54743, -91.547361, -91.547291, -91.547221, 27.11…
43	6318	G	NG15-02	Garden Banks	44866	0	0	0	0	0	2304	0	0	2304	2304	0	0	1	0	NA	1	44866	0.184041	0.00210978	list(c(-93.146035, -93.146042, -93.14605, -93.146057, -93.146064, -93.146071, -93.146078, -93.146086, -93.146093, -93.140006, -93.133919, -93.127831, -93.121744, -93.115657, -93.10957, -93.103483, -93.097395, -93.097391, -93.097386, -93.097381, -93.097376, -93.097371, -93.097366, -93.097362, -93.097357, -93.103442, -93.109526, -93.115611, -93.121696, -93.127781, -93.133866, -93.13995, -93.146035,…
44	6885	G	NG15-01	East Breaks	44866	0	0	0	0	0	2304	0	0	2304	2304	0	0	1	0	NA	1	44866	0.183582	0.00209979	list(c(-94.356997, -94.363054, -94.36911, -94.375167, -94.381224, -94.38728, -94.393337, -94.399393, -94.40545, -94.405518, -94.405586, -94.405654, -94.405722, -94.40579, -94.405858, -94.405926, -94.405994, -94.399935, -94.393876, -94.387817, -94.381758, -94.375699, -94.36964, -94.363581, -94.357522, -94.357457, -94.357391, -94.357325, -94.35726, -94.357194, -94.357128, -94.357063, -94.356997, 27…
45	7091	G	NH16-07	Viosca Knoll	44866	0	0	0	0	0	2304	0	0	2304	2304	0	0	1	0	NA	1	44866	0.185234	0.00213555	list(c(-88.028967, -88.035128, -88.035182, -88.035236, -88.03529, -88.035344, -88.035398, -88.035452, -88.035506, -88.03556, -88.029397, -88.023234, -88.017071, -88.010907, -88.004744, -87.998581, -87.992417, -87.986254, -87.986203, -87.986151, -87.986099, -87.986048, -87.985996, -87.985945, -87.985894, -87.985842, -87.992003, -87.998164, -88.004324, -88.010485, -88.016646, -88.022806, -88.028967…
46	7075	G	NH16-07	Viosca Knoll	44866	0	0	0	0	0	2304	0	0	2304	2304	0	0	1	0	NA	1	44866	0.185178	0.00213427	list(c(-88.81738, -88.823538, -88.823633, -88.823728, -88.823823, -88.823918, -88.824014, -88.824109, -88.824204, -88.824299, -88.818139, -88.811978, -88.805818, -88.799657, -88.793496, -88.787335, -88.781175, -88.775014, -88.774921, -88.774828, -88.774736, -88.774643, -88.77455, -88.774458, -88.774365, -88.774273, -88.780431, -88.786589, -88.792747, -88.798905, -88.805064, -88.811222, -88.81738,…
47	6889	G	NH14-12	Beeville	44866	0	0	0	0	0	2304	0	0	2304	2304	0	0	1	0	NA	1	44866	0.184299	0.00211507	list(c(-96.115533, -96.115678, -96.121783, -96.127888, -96.133992, -96.140097, -96.146202, -96.152306, -96.158411, -96.164516, -96.164373, -96.16423, -96.164087, -96.163944, -96.163801, -96.163658, -96.163515, -96.163372, -96.157265, -96.151158, -96.145051, -96.138944, -96.132836, -96.126729, -96.120622, -96.114515, -96.114661, -96.114806, -96.114952, -96.115097, -96.115243, -96.115388, -96.11553…
48	6603	G	NH15-11	Bouma Bank	44866	0	0	0	0	0	2304	0	0	2304	2304	0	0	1	0	NA	1	44866	0.184681	0.00212359	list(c(-93.876037, -93.882162, -93.882207, -93.882252, -93.882297, -93.882342, -93.882387, -93.882432, -93.882477, -93.882522, -93.876394, -93.870266, -93.864138, -93.858009, -93.851881, -93.845753, -93.839625, -93.833497, -93.833455, -93.833412, -93.83337, -93.833327, -93.833285, -93.833242, -93.8332, -93.833158, -93.839283, -93.845409, -93.851534, -93.85766, -93.863785, -93.869911, -93.876037, …
49	6327	G	NG15-03	Green Canyon	44866	0	0	0	0	0	2304	0	0	2304	2304	0	0	1	0	NA	1	44866	0.183913	0.00210687	list(c(-90.71274, -90.712853, -90.718932, -90.725011, -90.73109, -90.737169, -90.743248, -90.749327, -90.755406, -90.761485, -90.761375, -90.761265, -90.761154, -90.761044, -90.760933, -90.760823, -90.760712, -90.760602, -90.75452, -90.748439, -90.742357, -90.736276, -90.730194, -90.724113, -90.718032, -90.71195, -90.712063, -90.712176, -90.712289, -90.712402, -90.712515, -90.712628, -90.71274, 2…
50	6255	G	NG15-03	Green Canyon	44866	0	0	0	0	0	2304	0	0	2304	2304	0	0	1	0	NA	1	44866	0.184044	0.00210981	list(c(-91.782609, -91.782669, -91.788755, -91.79484, -91.800926, -91.807011, -91.813097, -91.819183, -91.825268, -91.831354, -91.831296, -91.831238, -91.831181, -91.831123, -91.831065, -91.831007, -91.830949, -91.830891, -91.824803, -91.818715, -91.812627, -91.806539, -91.800451, -91.794363, -91.788275, -91.782187, -91.782248, -91.782308, -91.782368, -91.782428, -91.782489, -91.782549, -91.78260…
51	7025	G	NG15-02	Garden Banks	44866	0	0	0	0	0	2304	0	0	2304	2304	0	0	1	0	NA	1	44866	0.183516	0.00209847	list(c(-92.757921, -92.757933, -92.763984, -92.770036, -92.776088, -92.782139, -92.788191, -92.794243, -92.800294, -92.806346, -92.806337, -92.806327, -92.806318, -92.806309, -92.806299, -92.80629, -92.806281, -92.806271, -92.800217, -92.794163, -92.788109, -92.782055, -92.776001, -92.769947, -92.763894, -92.75784, -92.757851, -92.757863, -92.757875, -92.757886, -92.757898, -92.757909, -92.757921…
52	7063	G	NH15-09	New Orleans	44866	0	0	0	0	0	2304	0	0	2304	2304	0	0	1	0	NA	1	44866	0.185195	0.00213467	list(c(-91.373447, -91.373532, -91.379691, -91.38585, -91.392008, -91.398167, -91.404326, -91.410485, -91.416644, -91.422803, -91.422721, -91.422639, -91.422556, -91.422474, -91.422391, -91.422309, -91.422227, -91.422144, -91.415983, -91.409821, -91.40366, -91.397498, -91.391337, -91.385175, -91.379014, -91.372852, -91.372937, -91.373022, -91.373107, -91.373192, -91.373277, -91.373362, -91.373447…
53	6936	G	NG15-01	East Breaks	44866	0	0	0	0	0	2304	0	0	2304	2304	0	0	1	0	NA	1	44866	0.183547	0.00209906	list(c(-94.356997, -94.35094, -94.344884, -94.338827, -94.33277, -94.326714, -94.320657, -94.3146, -94.308543, -94.30848, -94.308417, -94.308354, -94.30829, -94.308227, -94.308164, -94.308101, -94.308038, -94.314092, -94.320147, -94.326201, -94.332256, -94.33831, -94.344364, -94.350419, -94.356473, -94.356538, -94.356604, -94.356669, -94.356735, -94.3568, -94.356866, -94.356932, -94.356997, 27.20…
54	6365	G	NH15-11	Bouma Bank	44866	0	0	0	0	0	2304	0	0	2304	2304	0	0	1	0	NA	1	44866	0.184894	0.00212825	list(c(-93.245558, -93.251697, -93.257835, -93.263974, -93.270113, -93.276252, -93.282391, -93.28853, -93.294669, -93.294684, -93.294699, -93.294714, -93.294729, -93.294744, -93.29476, -93.294775, -93.29479, -93.288649, -93.282507, -93.276366, -93.270224, -93.264083, -93.257941, -93.2518, -93.245659, -93.245646, -93.245633, -93.245621, -93.245608, -93.245596, -93.245583, -93.24557, -93.245558, 28…
55	6405	G	NH15-08	Port Arthur	44866	0	0	0	1743.5424858171752	0	2304	560.4575141828072	3	0	1743.5424858171752	0	0	1	0	NA	1	44866	0.170246	0.0016252	list(c(-93.786838, -93.793033, -93.793075, -93.793117, -93.793128, -93.79166, -93.790215, -93.788795, -93.787401, -93.785812, -93.784265, -93.782765, -93.781313, -93.779911, -93.778562, -93.777266, -93.776027, -93.774846, -93.773724, -93.772663, -93.771665, -93.770732, -93.769864, -93.769062, -93.768744, -93.768387, -93.767934, -93.76752, -93.767143, -93.762383, -93.756185, -93.749987, -93.74379,…
56	6487	G	NH15-12	Ewing Bank	44866	0	0	0	0	0	2304	0	0	2304	2304	0	0	1	0	NA	1	44866	0.184626	0.00212217	list(c(-90.204152, -90.204295, -90.21042, -90.216545, -90.22267, -90.228795, -90.23492, -90.241045, -90.247171, -90.253296, -90.253156, -90.253015, -90.252875, -90.252734, -90.252594, -90.252453, -90.252313, -90.252172, -90.246044, -90.239917, -90.233789, -90.227661, -90.221534, -90.215406, -90.209279, -90.203151, -90.203294, -90.203437, -90.203581, -90.203724, -90.203866, -90.204009, -90.204152,…
57	6157	G	NH16-10	Mississippi Canyon	44866	0	0	0	0	0	2304	0	0	2304	2304	0	0	1	0	NA	1	44866	0.184872	0.00212747	list(c(-89.754624, -89.748481, -89.742338, -89.736195, -89.730052, -89.723909, -89.717766, -89.711623, -89.70548, -89.70534, -89.7052, -89.70506, -89.70492, -89.70478, -89.70464, -89.704501, -89.704361, -89.710502, -89.716642, -89.722783, -89.728923, -89.735064, -89.741204, -89.747344, -89.753485, -89.753627, -89.753769, -89.753912, -89.754054, -89.754196, -89.754339, -89.754481, -89.754624, 28.8…
58	6864	G	NG15-03	Green Canyon	44866	0	0	0	0	0	2304	0	0	2304	2304	0	0	1	0	NA	1	44866	0.183565	0.00209938	list(c(-91.352227, -91.352306, -91.358362, -91.364418, -91.370474, -91.376529, -91.382585, -91.388641, -91.394697, -91.400753, -91.400675, -91.400598, -91.400521, -91.400443, -91.400366, -91.400288, -91.400211, -91.400134, -91.394075, -91.388017, -91.381959, -91.375901, -91.369843, -91.363785, -91.357727, -91.351669, -91.351749, -91.351828, -91.351908, -91.351988, -91.352068, -91.352147, -91.3522…
59	6852	G	NG15-01	East Breaks	44866	0	0	0	0	0	2112.14	0	0	2112.135357915313	2112.135357915313	0	0	0	0	NA	1	44866	0.175352	0.00192126	list(c(-95.997402, -96, -96, -96, -96, -96, -96, -96, -96, -96, -96, -96, -96, -96, -96, -96, -96, -96, -96, -96, -96, -96, -96, -96, -96, -96, -96, -96, -96, -96, -96, -96, -96, -96, -96, -96, -96, -96, -96, -96, -96, -96, -96, -96, -96, -96, -96, -96, -96, -96, -96, -96, -96, -96, -96, -96, -96, -96, -96, -96, -96, -96, -96, -96, -96, -96, -96, -96, -96, -96, -96, -96, -96, -96, -96, -96, -96, …
60	6967	G	NG15-02	Garden Banks	44866	0	0	0	0	0	2304	0	0	2304	2304	0	0	1	0	NA	1	44866	0.183555	0.00209926	list(c(-93.187675, -93.193729, -93.193738, -93.193747, -93.193757, -93.193766, -93.193775, -93.193785, -93.193794, -93.193803, -93.187747, -93.181691, -93.175634, -93.169578, -93.163522, -93.157465, -93.151409, -93.145353, -93.145346, -93.145339, -93.145332, -93.145325, -93.145318, -93.145311, -93.145304, -93.145297, -93.151351, -93.157405, -93.163459, -93.169513, -93.175567, -93.181621, -93.1876…
61	6878	G	NG15-03	Green Canyon	44866	0	0	0	0	0	2304	0	0	2304	2304	0	0	1	0	NA	1	44866	0.183496	0.00209784	list(c(-90.674118, -90.674231, -90.680283, -90.686336, -90.692389, -90.698441, -90.704494, -90.710547, -90.7166, -90.722653, -90.722543, -90.722433, -90.722323, -90.722213, -90.722103, -90.721992, -90.721882, -90.721772, -90.715717, -90.709661, -90.703606, -90.697551, -90.691496, -90.685441, -90.679386, -90.673331, -90.673444, -90.673556, -90.673669, -90.673781, -90.673893, -90.674006, -90.674118…
62	6551	G	NH15-09	New Orleans	44866	0	0	0	93.99474695702597	0	2304	2210.0052530429703	1	0	93.99474695702597	0	0	1	0	NA	1	44866	0.0624246	8.7634068001e-5	list(c(-91.99174, -91.989499, -91.987258, -91.985018, -91.983996, -91.983903, -91.983297, -91.982655, -91.985251, -91.991437, -91.997624, -92.003811, -92.009997, -92.009945, -92.009941, -92.00898, -92.007172, -92.005013, -92.002834, -92.000638, -91.998429, -91.996207, -91.993977, -91.99174, 29.460861, 29.460794, 29.460805, 29.460893, 29.460958, 29.460763, 29.459551, 29.458356, 29.458376, 29.45842…
63	6924	G	NH16-10	Mississippi Canyon	44866	0	0	0	0	0	2304	0	0	2304	2304	0	0	1	0	NA	1	44866	0.184375	0.0021169	list(c(-88.900267, -88.906374, -88.90647, -88.906566, -88.906662, -88.906758, -88.906854, -88.90695, -88.907046, -88.907142, -88.901032, -88.894922, -88.888812, -88.882702, -88.876592, -88.870482, -88.864372, -88.858262, -88.858169, -88.858075, -88.857981, -88.857888, -88.857794, -88.857701, -88.857607, -88.857514, -88.863622, -88.869729, -88.875837, -88.881944, -88.888052, -88.894159, -88.900267…
64	6530	G	NG15-02	Garden Banks	44866	0	0	0	0	0	2304	0	0	2304	2304	0	0	1	0	NA	1	44866	0.183885	0.00210641	list(c(-92.513964, -92.513988, -92.520063, -92.526138, -92.532213, -92.538288, -92.544363, -92.550438, -92.556513, -92.562588, -92.562566, -92.562545, -92.562523, -92.562502, -92.56248, -92.562459, -92.562437, -92.562416, -92.556339, -92.550261, -92.544184, -92.538106, -92.532029, -92.525952, -92.519874, -92.513797, -92.513821, -92.513845, -92.513868, -92.513892, -92.513916, -92.51394, -92.513964…
65	6928	G	NG15-01	East Breaks	44866	0	0	0	0	0	2304	0	0	2304	2304	0	0	1	0	NA	1	44866	0.183518	0.00209838	list(c(-94.737855, -94.743908, -94.743992, -94.744076, -94.74416, -94.744244, -94.744329, -94.744413, -94.744497, -94.744581, -94.738526, -94.732471, -94.726415, -94.72036, -94.714305, -94.708249, -94.702194, -94.696138, -94.696056, -94.695974, -94.695892, -94.69581, -94.695729, -94.695647, -94.695565, -94.695483, -94.701536, -94.707589, -94.713643, -94.719696, -94.725749, -94.731802, -94.737855,…
66	6818	G	NG15-01	East Breaks	44866	0	0	0	0	0	2304	0	0	2304	2304	0	0	1	0	NA	1	44866	0.183543	0.00209887	list(c(-95.22373, -95.229785, -95.229893, -95.230001, -95.230109, -95.230217, -95.230325, -95.230433, -95.230541, -95.230649, -95.224592, -95.218534, -95.212476, -95.206418, -95.20036, -95.194302, -95.188244, -95.182186, -95.18208, -95.181974, -95.181869, -95.181763, -95.181657, -95.181552, -95.181446, -95.18134, -95.187396, -95.193452, -95.199507, -95.205563, -95.211619, -95.217674, -95.22373, 2…
67	6938	G	NH15-07	Houston	44866	0	0	0	0	0	2304	0	0	2304	2304	0	0	1	0	NA	1	44866	0.185348	0.00213801	list(c(-94.184962, -94.178792, -94.172621, -94.166451, -94.16028, -94.154109, -94.147939, -94.141768, -94.135597, -94.135537, -94.135478, -94.135418, -94.135359, -94.135299, -94.135239, -94.13518, -94.13512, -94.141288, -94.147457, -94.153625, -94.159793, -94.165961, -94.172129, -94.178297, -94.184465, -94.184527, -94.184589, -94.184651, -94.184713, -94.184776, -94.184838, -94.1849, -94.184962, 2…
68	6511	G	NG15-02	Garden Banks	44866	0	0	0	0	0	2304	0	0	2304	2304	0	0	1	0	NA	1	44866	0.183885	0.00210641	list(c(-93.479937, -93.486012, -93.486036, -93.48606, -93.486084, -93.486108, -93.486132, -93.486155, -93.486179, -93.486203, -93.480126, -93.474048, -93.467971, -93.461894, -93.455816, -93.449739, -93.443661, -93.437584, -93.437563, -93.437541, -93.43752, -93.437498, -93.437477, -93.437455, -93.437434, -93.437412, -93.443487, -93.449562, -93.455637, -93.461712, -93.467787, -93.473862, -93.479937…
69	6175	G	NH16-10	Mississippi Canyon	44866	0	0	0	0	0	2304	0	0	2304	2304	0	0	1	0	NA	1	44866	0.184972	0.0021298	list(c(-88.819755, -88.8259, -88.832045, -88.83819, -88.844335, -88.850481, -88.856626, -88.862771, -88.868916, -88.869013, -88.869109, -88.869206, -88.869302, -88.869399, -88.869496, -88.869593, -88.86969, -88.863542, -88.857394, -88.851247, -88.845099, -88.838951, -88.832803, -88.826656, -88.820508, -88.820414, -88.820319, -88.820225, -88.820131, -88.820037, -88.819943, -88.819849, -88.819755, …
70	6889	G	NG14-03	Corpus Christi	44866	0	0	0	0	0	2304	0	0	2304	2304	0	0	1	0	NA	1	44866	0.183428	0.00209626	list(c(-96.14159, -96.141728, -96.147778, -96.153827, -96.159877, -96.165927, -96.171976, -96.178026, -96.184076, -96.190126, -96.18999, -96.189855, -96.189719, -96.189583, -96.189447, -96.189311, -96.189176, -96.18904, -96.182987, -96.176935, -96.170883, -96.164831, -96.158779, -96.152727, -96.146675, -96.140623, -96.140761, -96.1409, -96.141038, -96.141176, -96.141314, -96.141452, -96.14159, 27…
71	6280	G	NG15-02	Garden Banks	44866	0	0	0	0	0	2304	0	0	2304	2304	0	0	1	0	NA	1	44866	0.184075	0.00211048	list(c(-92.513006, -92.51303, -92.519117, -92.525204, -92.531291, -92.537378, -92.543465, -92.549552, -92.555639, -92.561726, -92.561704, -92.561682, -92.561661, -92.561639, -92.561617, -92.561596, -92.561574, -92.561552, -92.555463, -92.549374, -92.543284, -92.537195, -92.531105, -92.525016, -92.518927, -92.512837, -92.512861, -92.512886, -92.51291, -92.512934, -92.512958, -92.512982, -92.513006…
72	6201	G	NH15-12	Ewing Bank	44866	0	0	0	0	0	2304	0	0	2304	2304	0	0	1	0	NA	1	44866	0.184992	0.0021303	list(c(-91.967394, -91.967448, -91.973593, -91.979738, -91.985884, -91.992029, -91.998174, -92.00432, -92.010465, -92.016611, -92.01656, -92.016509, -92.016458, -92.016408, -92.016357, -92.016306, -92.016255, -92.016204, -92.010056, -92.003908, -91.99776, -91.991612, -91.985464, -91.979317, -91.973169, -91.967021, -91.967074, -91.967128, -91.967181, -91.967234, -91.967288, -91.967341, -91.967394,…
73	6911	G	NH15-08	Port Arthur	44866	0	0	0	0	0	2304	0	0	2304	2304	0	0	1	0	NA	1	44866	0.185376	0.00213865	list(c(-93.487394, -93.493563, -93.493589, -93.493615, -93.493641, -93.493667, -93.493693, -93.493719, -93.493745, -93.49377, -93.487599, -93.481427, -93.475255, -93.469083, -93.462911, -93.456739, -93.450567, -93.444395, -93.444371, -93.444348, -93.444325, -93.444301, -93.444278, -93.444255, -93.444231, -93.444208, -93.450377, -93.456547, -93.462716, -93.468886, -93.475055, -93.481224, -93.48739…
74	6785	G	NG15-01	East Breaks	44866	0	0	0	0	0	2304	0	0	2304	2304	0	0	1	0	NA	1	44866	0.183656	0.00210139	list(c(-94.400478, -94.406539, -94.406607, -94.406675, -94.406744, -94.406812, -94.40688, -94.406949, -94.407017, -94.407085, -94.401022, -94.394958, -94.388895, -94.382831, -94.376767, -94.370704, -94.36464, -94.358576, -94.35851, -94.358444, -94.358378, -94.358313, -94.358247, -94.358181, -94.358115, -94.358049, -94.36411, -94.370171, -94.376233, -94.382294, -94.388355, -94.394417, -94.400478, …
75	6823	G	NH16-10	Mississippi Canyon	44866	0	0	0	0	0	2304	0	0	2304	2304	0	0	1	0	NA	1	44866	0.18445	0.00211847	list(c(-88.950698, -88.95681, -88.956908, -88.957007, -88.957106, -88.957205, -88.957304, -88.957403, -88.957502, -88.957601, -88.951486, -88.945372, -88.939257, -88.933142, -88.927028, -88.920913, -88.914798, -88.908683, -88.908587, -88.90849, -88.908394, -88.908297, -88.908201, -88.908105, -88.908008, -88.907912, -88.914024, -88.920136, -88.926249, -88.932361, -88.938473, -88.944585, -88.950698…
76	6179	G	NH15-11	Bouma Bank	44866	0	0	0	0	0	2304	0	0	2304	2304	0	0	1	0	NA	1	44866	0.185054	0.00213165	list(c(-92.557248, -92.55727, -92.563419, -92.569568, -92.575717, -92.581866, -92.588015, -92.594164, -92.600313, -92.606462, -92.606441, -92.606421, -92.6064, -92.60638, -92.60636, -92.606339, -92.606319, -92.606299, -92.600147, -92.593996, -92.587844, -92.581693, -92.575541, -92.56939, -92.563238, -92.557087, -92.55711, -92.557133, -92.557156, -92.557179, -92.557202, -92.557225, -92.557248, 28.…
77	6239	G	NG15-02	Garden Banks	44866	0	0	0	0	0	2304	0	0	2304	2304	0	0	1	0	NA	1	44866	0.184098	0.00211097	list(c(-92.074381, -92.074426, -92.080515, -92.086604, -92.092692, -92.098781, -92.10487, -92.110959, -92.117047, -92.123136, -92.123093, -92.123049, -92.123006, -92.122962, -92.122919, -92.122875, -92.122832, -92.122788, -92.116697, -92.110606, -92.104515, -92.098424, -92.092333, -92.086241, -92.08015, -92.074059, -92.074105, -92.074151, -92.074197, -92.074243, -92.074289, -92.074335, -92.074381…
78	6662	G	NH15-08	Port Arthur	44866	0	0	0	0	0	2304	0	0	2304	2304	0	0	1	0	NA	1	44866	0.185581	0.0021431	list(c(-93.438963, -93.445145, -93.445169, -93.445193, -93.445216, -93.44524, -93.445263, -93.445287, -93.44531, -93.445334, -93.439149, -93.432964, -93.426779, -93.420594, -93.414409, -93.408224, -93.402039, -93.395854, -93.395833, -93.395812, -93.395791, -93.39577, -93.395749, -93.395728, -93.395707, -93.395686, -93.401868, -93.408051, -93.414233, -93.420416, -93.426598, -93.432781, -93.438963,…
79	6129	G	NH16-10	Mississippi Canyon	44866	0	0	0	0	0	2304	0	0	2304	2304	0	0	1	0	NA	1	44866	0.185028	0.00213106	list(c(-88.672953, -88.67304, -88.673127, -88.673213, -88.6733, -88.673387, -88.673474, -88.67356, -88.673647, -88.667496, -88.661345, -88.655194, -88.649043, -88.642892, -88.636741, -88.63059, -88.624439, -88.624355, -88.62427, -88.624186, -88.624102, -88.624018, -88.623934, -88.623849, -88.623765, -88.629914, -88.636063, -88.642211, -88.64836, -88.654508, -88.660656, -88.666805, -88.672953, 28.…
80	6336	G	NG14-03	Corpus Christi	44866	0	0	0	0	0	2304	0	0	2304	2304	0	0	1	0	NA	1	44866	0.18386	0.0021056	list(c(-96.275125, -96.275259, -96.281336, -96.287412, -96.293489, -96.299565, -96.305642, -96.311718, -96.317795, -96.323872, -96.32374, -96.323608, -96.323476, -96.323344, -96.323212, -96.32308, -96.322948, -96.322816, -96.316737, -96.310658, -96.304579, -96.2985, -96.292421, -96.286342, -96.280263, -96.274184, -96.274319, -96.274453, -96.274588, -96.274722, -96.274856, -96.274991, -96.275125, …
81	6434	G	NG15-02	Garden Banks	44866	0	0	0	0	0	2304	0	0	2304	2304	0	0	1	0	NA	1	44866	0.183955	0.00210791	list(c(-92.319024, -92.319058, -92.325137, -92.331217, -92.337296, -92.343376, -92.349455, -92.355535, -92.361614, -92.367694, -92.367663, -92.367632, -92.367601, -92.36757, -92.367538, -92.367507, -92.367476, -92.367445, -92.361363, -92.355281, -92.349199, -92.343117, -92.337035, -92.330953, -92.324872, -92.31879, -92.318823, -92.318857, -92.31889, -92.318924, -92.318957, -92.318991, -92.319024,…
82	6424	G	NG14-06	Port Isabel	44866	0	0	0	0	0	2304	0	0	2304	2304	0	0	1	0	NA	1	44866	0.183009	0.00208733	list(c(-96.879287, -96.885308, -96.89133, -96.897351, -96.903373, -96.909394, -96.915416, -96.921437, -96.927459, -96.927361, -96.927264, -96.927166, -96.927069, -96.926971, -96.926873, -96.926776, -96.926678, -96.920654, -96.91463, -96.908606, -96.902582, -96.896559, -96.890535, -96.884511, -96.878487, -96.878587, -96.878687, -96.878787, -96.878887, -96.878987, -96.879087, -96.879187, -96.879287…
83	6126	G	NG15-03	Green Canyon	44866	0	0	0	0	0	2304	0	0	2304	2304	0	0	1	0	NA	1	44866	0.18407	0.00211028	list(c(-90.757827, -90.757939, -90.764027, -90.770116, -90.776205, -90.782294, -90.788383, -90.794472, -90.800561, -90.80665, -90.806541, -90.806432, -90.806323, -90.806214, -90.806105, -90.805996, -90.805886, -90.805777, -90.799686, -90.793595, -90.787503, -90.781412, -90.775321, -90.769229, -90.763138, -90.757047, -90.757158, -90.75727, -90.757382, -90.757493, -90.757604, -90.757716, -90.757827…
84	6234	G	NH15-11	Bouma Bank	44866	0	0	0	0	0	2304	0	0	2304	2304	0	0	1	0	NA	1	44866	0.185006	0.00213062	list(c(-92.360775, -92.360742, -92.360709, -92.360676, -92.360642, -92.360609, -92.360576, -92.360543, -92.36051, -92.354362, -92.348213, -92.342064, -92.335916, -92.329767, -92.323619, -92.31747, -92.311322, -92.311357, -92.311393, -92.311428, -92.311464, -92.3115, -92.311535, -92.311571, -92.311606, -92.317752, -92.323898, -92.330044, -92.33619, -92.342336, -92.348482, -92.354628, -92.360775, 2…
85	6107	G	NH16-10	Mississippi Canyon	44866	0	0	0	0	0	2304	0	0	2304	2304	0	0	1	0	NA	1	44866	0.18491	0.00212832	list(c(-89.70548, -89.711623, -89.717766, -89.723909, -89.730052, -89.736195, -89.742338, -89.748481, -89.754624, -89.754766, -89.754909, -89.755051, -89.755194, -89.755337, -89.755479, -89.755622, -89.755765, -89.74962, -89.743474, -89.737329, -89.731183, -89.725038, -89.718892, -89.712746, -89.706601, -89.70646, -89.70632, -89.70618, -89.70604, -89.7059, -89.70576, -89.70562, -89.70548, 28.8285…
86	6153	G	NH16-10	Mississippi Canyon	44866	0	0	0	0	0	2304	0	0	2304	2304	0	0	1	0	NA	1	44866	0.184842	0.00212681	list(c(-89.943816, -89.949955, -89.950107, -89.950259, -89.950412, -89.950564, -89.950717, -89.950869, -89.951022, -89.951174, -89.945033, -89.938891, -89.93275, -89.926608, -89.920466, -89.914324, -89.908183, -89.902041, -89.901891, -89.901741, -89.901591, -89.901441, -89.901291, -89.901141, -89.900991, -89.900841, -89.90698, -89.91312, -89.919259, -89.925398, -89.931537, -89.937677, -89.943816,…
87	6081	G	NG15-03	Green Canyon	44866	0	0	0	0	0	2304	0	0	2304	2304	0	0	1	0	NA	1	44866	0.18408	0.00211042	list(c(-90.513302, -90.513426, -90.519516, -90.525605, -90.531695, -90.537785, -90.543875, -90.549965, -90.556056, -90.562146, -90.562024, -90.561903, -90.561782, -90.56166, -90.561539, -90.561418, -90.561296, -90.561175, -90.555082, -90.54899, -90.542897, -90.536805, -90.530712, -90.52462, -90.518528, -90.512435, -90.512559, -90.512683, -90.512807, -90.512931, -90.513055, -90.513178, -90.513302,…
88	6262	G	NG15-02	Garden Banks	44866	0	0	0	0	0	2304	0	0	2304	2304	0	0	1	0	NA	1	44866	0.184077	0.00211053	list(c(-93.432187, -93.438274, -93.438296, -93.438318, -93.438339, -93.438361, -93.438383, -93.438404, -93.438426, -93.438448, -93.432358, -93.426269, -93.420179, -93.41409, -93.408001, -93.401911, -93.395822, -93.389732, -93.389713, -93.389694, -93.389674, -93.389655, -93.389636, -93.389617, -93.389597, -93.389578, -93.395665, -93.401752, -93.407839, -93.413926, -93.420013, -93.4261, -93.432187,…
89	7089	G	NG15-02	Garden Banks	44866	0	0	0	0	0	2304	0	0	2304	2304	0	0	1	0	NA	1	44866	0.183462	0.00209723	list(c(-92.080498, -92.080542, -92.086591, -92.092639, -92.098688, -92.104736, -92.110785, -92.116833, -92.122882, -92.12893, -92.128888, -92.128847, -92.128805, -92.128763, -92.128721, -92.128679, -92.128637, -92.128595, -92.122545, -92.116494, -92.110443, -92.104392, -92.098341, -92.092291, -92.08624, -92.080189, -92.080233, -92.080277, -92.080322, -92.080366, -92.08041, -92.080454, -92.080498,…
90	7140	G	NH15-07	Houston	44866	0	0	0	0	0	2304	0	0	2304	2304	0	0	1	0	NA	1	44866	0.185191	0.00213459	list(c(-94.077802, -94.08396, -94.084017, -94.084073, -94.08413, -94.084186, -94.084243, -94.084299, -94.084356, -94.084412, -94.078252, -94.072091, -94.065931, -94.05977, -94.05361, -94.047449, -94.041288, -94.035128, -94.035074, -94.03502, -94.034966, -94.034912, -94.034858, -94.034804, -94.03475, -94.034696, -94.040854, -94.047012, -94.05317, -94.059328, -94.065486, -94.071644, -94.077802, 28.…
91	6581	G	NH15-11	Bouma Bank	44866	0	0	0	0	0	2304	0	0	2304	2304	0	0	1	0	NA	1	44866	0.184731	0.00212472	list(c(-92.460637, -92.460665, -92.466793, -92.472922, -92.479051, -92.485179, -92.491308, -92.497436, -92.503565, -92.509694, -92.509669, -92.509644, -92.509619, -92.509594, -92.509569, -92.509544, -92.509519, -92.509493, -92.503362, -92.497231, -92.4911, -92.484969, -92.478838, -92.472707, -92.466576, -92.460445, -92.460472, -92.4605, -92.460527, -92.460555, -92.460582, -92.46061, -92.460637, 2…
92	6419	G	NG14-06	Port Isabel	44866	0	0	0	6.242398149099359	0	2304	2297.7576018509008	1	0	6.242398149099359	0	0	1	0	NA	1	44866	0.0136447	5.676405e-6	list(c(-97.119457, -97.119545, -97.119905, -97.120871, -97.121845, -97.119457, 26.633315, 26.627949, 26.628987, 26.631683, 26.633346, 26.633315))
93	6887	G	NH15-07	Houston	44866	0	0	0	0	0	2304	0	0	2304	2304	0	0	1	0	NA	1	44866	0.185387	0.00213882	list(c(-94.184962, -94.191133, -94.197304, -94.203474, -94.209645, -94.215815, -94.221986, -94.228156, -94.234327, -94.234391, -94.234456, -94.234521, -94.234586, -94.234651, -94.234716, -94.234781, -94.234846, -94.228673, -94.2225, -94.216327, -94.210154, -94.20398, -94.197807, -94.191634, -94.185461, -94.185399, -94.185336, -94.185274, -94.185212, -94.185149, -94.185087, -94.185025, -94.184962,…
94	6225	G	NH16-10	Mississippi Canyon	44866	0	0	0	0	0	2304	0	0	2304	2304	0	0	1	0	NA	1	44866	0.184932	0.00212891	list(c(-88.868916, -88.862771, -88.856626, -88.850481, -88.844335, -88.83819, -88.832045, -88.8259, -88.819755, -88.819661, -88.819567, -88.819473, -88.819379, -88.819285, -88.819191, -88.819097, -88.819003, -88.825146, -88.831288, -88.837431, -88.843574, -88.849716, -88.855859, -88.862001, -88.868144, -88.86824, -88.868337, -88.868433, -88.86853, -88.868626, -88.868723, -88.868819, -88.868916, 2…
95	6110	G	NG15-03	Green Canyon	44866	0	0	0	0	0	2304	0	0	2304	2304	0	0	1	0	NA	1	44866	0.184143	0.0021119	list(c(-91.537451, -91.537524, -91.543616, -91.549708, -91.5558, -91.561892, -91.567984, -91.574076, -91.580169, -91.586261, -91.58619, -91.58612, -91.58605, -91.58598, -91.585909, -91.585839, -91.585769, -91.585698, -91.579604, -91.573509, -91.567414, -91.56132, -91.555225, -91.549131, -91.543036, -91.536942, -91.537015, -91.537087, -91.53716, -91.537233, -91.537306, -91.537378, -91.537451, 27.8…
96	6556	G	NH15-12	Ewing Bank	44866	0	0	0	0	0	2304	0	0	2304	2304	0	0	1	0	NA	1	44866	0.184699	0.00212396	list(c(-91.725249, -91.725314, -91.731441, -91.737568, -91.743695, -91.749822, -91.755949, -91.762077, -91.768204, -91.774331, -91.774268, -91.774206, -91.774143, -91.774081, -91.774018, -91.773956, -91.773893, -91.773831, -91.767701, -91.761571, -91.755442, -91.749312, -91.743182, -91.737053, -91.730923, -91.724794, -91.724859, -91.724924, -91.724989, -91.725054, -91.725119, -91.725184, -91.7252…
97	6179	G	NG15-01	East Breaks	44866	0	0	0	0	0	2304	0	0	2304	2304	0	0	1	0	NA	1	44866	0.184086	0.00211063	list(c(-94.699374, -94.705463, -94.705548, -94.705632, -94.705717, -94.705802, -94.705886, -94.705971, -94.706056, -94.70614, -94.700049, -94.693958, -94.687867, -94.681776, -94.675684, -94.669593, -94.663502, -94.65741, -94.657328, -94.657246, -94.657164, -94.657081, -94.656999, -94.656917, -94.656835, -94.656752, -94.662841, -94.66893, -94.675019, -94.681108, -94.687197, -94.693286, -94.699374,…
98	6213	G	NG15-03	Green Canyon	44866	0	0	0	0	0	2304	0	0	2304	2304	0	0	1	0	NA	1	44866	0.184054	0.00211	list(c(-91.392517, -91.392597, -91.398684, -91.40477, -91.410857, -91.416944, -91.423031, -91.429117, -91.435204, -91.441291, -91.441214, -91.441137, -91.44106, -91.440982, -91.440905, -91.440828, -91.440751, -91.440673, -91.434584, -91.428495, -91.422405, -91.416316, -91.410227, -91.404138, -91.398049, -91.39196, -91.392039, -91.392119, -91.392199, -91.392278, -91.392358, -91.392438, -91.392517,…
99	6322	G	NH15-12	Ewing Bank	44866	0	0	0	0	0	2304	0	0	2304	2304	0	0	1	0	NA	1	44866	0.184831	0.00212677	list(c(-90.936161, -90.936267, -90.936373, -90.936479, -90.936585, -90.936692, -90.936798, -90.936904, -90.93701, -90.943146, -90.949283, -90.95542, -90.961556, -90.967693, -90.97383, -90.979967, -90.986103, -90.986, -90.985896, -90.985793, -90.985689, -90.985585, -90.985482, -90.985378, -90.985274, -90.979135, -90.972996, -90.966856, -90.960717, -90.954578, -90.948439, -90.9423, -90.936161, 28.7…
100	6702	G	NH15-11	Bouma Bank	44866	0	0	0	0	0	2304	0	0	2304	2304	0	0	1	0	NA	1	44866	0.184599	0.00212183	list(c(-93.924289, -93.93041, -93.930457, -93.930504, -93.930551, -93.930598, -93.930646, -93.930693, -93.93074, -93.930787, -93.924664, -93.918541, -93.912418, -93.906295, -93.900172, -93.894049, -93.887926, -93.881803, -93.881759, -93.881714, -93.881669, -93.881624, -93.88158, -93.881535, -93.88149, -93.881446, -93.887566, -93.893687, -93.899807, -93.905928, -93.912048, -93.918169, -93.924289, …
101	6590	G	NG15-03	Green Canyon	44866	0	0	0	0	0	2304	0	0	2304	2304	0	0	1	0	NA	1	44866	0.183643	0.00210091	list(c(-90.086411, -90.086553, -90.092616, -90.09868, -90.104743, -90.110807, -90.11687, -90.122934, -90.128997, -90.135061, -90.134921, -90.134781, -90.134641, -90.134501, -90.134361, -90.134221, -90.134081, -90.133941, -90.127875, -90.121809, -90.115743, -90.109677, -90.103611, -90.097546, -90.09148, -90.085414, -90.085557, -90.085699, -90.085842, -90.085984, -90.086126, -90.086269, -90.086411,…
102	7078	G	NH16-10	Mississippi Canyon	44866	0	0	0	0	0	2304	0	0	2304	2304	0	0	1	0	NA	1	44866	0.184278	0.00211479	list(c(-88.660057, -88.666158, -88.672259, -88.67836, -88.684461, -88.690562, -88.696663, -88.702764, -88.708865, -88.70895, -88.709036, -88.709121, -88.709207, -88.709293, -88.709378, -88.709464, -88.70955, -88.703446, -88.697343, -88.69124, -88.685136, -88.679033, -88.672929, -88.666826, -88.660722, -88.660639, -88.660556, -88.660473, -88.660389, -88.660306, -88.660223, -88.66014, -88.660057, 2…
103	7108	G	NH15-10	Bay City	44866	0	0	0	0	0	2304	0	0	2304	2304	0	0	1	0	NA	1	44866	0.184132	0.00211152	list(c(-95.63482, -95.640914, -95.647008, -95.653102, -95.659195, -95.665289, -95.671383, -95.677476, -95.68357, -95.683704, -95.683838, -95.683972, -95.684106, -95.68424, -95.684374, -95.684508, -95.684643, -95.678547, -95.672451, -95.666354, -95.660258, -95.654162, -95.648066, -95.64197, -95.635874, -95.635742, -95.63561, -95.635478, -95.635347, -95.635215, -95.635083, -95.634952, -95.63482, 27…
104	6763	G	NG15-03	Green Canyon	44866	0	0	0	0	0	2304	0	0	2304	2304	0	0	1	0	NA	1	44866	0.183642	0.00210107	list(c(-91.399436, -91.399513, -91.405574, -91.411634, -91.417695, -91.423756, -91.429816, -91.435877, -91.441938, -91.447998, -91.447923, -91.447848, -91.447772, -91.447697, -91.447622, -91.447546, -91.447471, -91.447395, -91.441332, -91.435269, -91.429206, -91.423143, -91.41708, -91.411017, -91.404954, -91.398891, -91.398969, -91.399047, -91.399125, -91.399203, -91.39928, -91.399358, -91.399436…
105	6276	G	NH15-11	Bouma Bank	44866	0	0	0	0	0	2304	0	0	2304	2304	0	0	1	0	NA	1	44866	0.184975	0.00212997	list(c(-92.705073, -92.705089, -92.711233, -92.717376, -92.72352, -92.729664, -92.735808, -92.741952, -92.748096, -92.75424, -92.754227, -92.754215, -92.754202, -92.754189, -92.754177, -92.754164, -92.754151, -92.754139, -92.747992, -92.741846, -92.735699, -92.729553, -92.723406, -92.71726, -92.711113, -92.704967, -92.704982, -92.704997, -92.705013, -92.705028, -92.705043, -92.705058, -92.705073,…
106	7072	G	NH15-08	Port Arthur	44866	0	0	0	0	0	2304	0	0	2304	2304	0	0	1	0	NA	1	44866	0.185258	0.00213611	list(c(-92.901405, -92.90141, -92.907572, -92.913734, -92.919895, -92.926057, -92.932219, -92.938381, -92.944543, -92.950705, -92.950702, -92.9507, -92.950697, -92.950695, -92.950692, -92.950689, -92.950687, -92.950684, -92.94452, -92.938355, -92.932191, -92.926026, -92.919862, -92.913698, -92.907533, -92.901369, -92.901374, -92.901379, -92.901384, -92.901389, -92.901394, -92.9014, -92.901405, 29…
107	6674	G	NG14-03	Corpus Christi	44866	0	0	0	0	0	2304	0	0	2304	2304	0	0	1	0	NA	1	44866	0.183667	0.00210153	list(c(-96.863788, -96.863893, -96.863997, -96.864101, -96.864205, -96.864309, -96.864413, -96.864517, -96.864621, -96.870684, -96.876747, -96.88281, -96.888873, -96.894936, -96.900999, -96.907062, -96.913126, -96.913024, -96.912923, -96.912821, -96.912719, -96.912618, -96.912516, -96.912414, -96.912312, -96.906247, -96.900181, -96.894116, -96.88805, -96.881985, -96.875919, -96.869854, -96.863788…
108	6539	G	NG14-03	Corpus Christi	44866	0	0	0	0	0	2304	0	0	2304	2304	0	0	1	0	NA	1	44866	0.183687	0.00210189	list(c(-96.132819, -96.132959, -96.133099, -96.13324, -96.13338, -96.13352, -96.133661, -96.133801, -96.133941, -96.140007, -96.146073, -96.152139, -96.158205, -96.164271, -96.170338, -96.176404, -96.18247, -96.182332, -96.182195, -96.182057, -96.181919, -96.181781, -96.181643, -96.181505, -96.181367, -96.175298, -96.169229, -96.163161, -96.157092, -96.151024, -96.144955, -96.138887, -96.132819, …
109	6956	G	NH15-12	Ewing Bank	44866	0	0	0	0	0	2304	0	0	2304	2304	0	0	1	0	NA	1	44866	0.184387	0.00211719	list(c(-91.729371, -91.729435, -91.735543, -91.74165, -91.747757, -91.753865, -91.759972, -91.766079, -91.772187, -91.778294, -91.778233, -91.778171, -91.77811, -91.778048, -91.777987, -91.777925, -91.777864, -91.777802, -91.771693, -91.765583, -91.759473, -91.753363, -91.747253, -91.741144, -91.735034, -91.728924, -91.728988, -91.729052, -91.729116, -91.72918, -91.729244, -91.729308, -91.729371,…
110	6602	G	NH15-10	Bay City	44866	0	0	0	2259.4224681533947	0	2304	34.956004314099445	3	9.621527532506327	2269.043995685901	0	0	1	0	NA	1	44866	0.180448	0.00208688	list(c(-95.981911, -95.988027, -95.988179, -95.988331, -95.988483, -95.988635, -95.988787, -95.988939, -95.989091, -95.989104, -95.986204, -95.983323, -95.980463, -95.977623, -95.976679, -95.970887, -95.964768, -95.958649, -95.95253, -95.946411, -95.940292, -95.940142, -95.939993, -95.939843, -95.939694, -95.939544, -95.939395, -95.939246, -95.939096, -95.945213, -95.951329, -95.957446, -95.96356…
111	6954	G	NH15-11	Bouma Bank	44866	0	0	0	0	0	2304	0	0	2304	2304	0	0	1	0	NA	1	44866	0.18441	0.00211772	list(c(-93.824693, -93.830802, -93.830843, -93.830885, -93.830927, -93.830969, -93.83101, -93.831052, -93.831094, -93.831136, -93.825025, -93.818914, -93.812804, -93.806693, -93.800582, -93.794471, -93.78836, -93.782249, -93.78221, -93.782171, -93.782131, -93.782092, -93.782053, -93.782013, -93.781974, -93.781935, -93.788043, -93.794152, -93.80026, -93.806368, -93.812477, -93.818585, -93.824693, …
112	6284	G	NH15-12	Ewing Bank	44866	0	0	0	0	0	2304	0	0	2304	2304	0	0	1	0	NA	1	44866	0.184803	0.00212605	list(c(-90.396043, -90.395909, -90.395775, -90.395641, -90.395507, -90.395373, -90.395238, -90.395104, -90.39497, -90.388831, -90.382692, -90.376554, -90.370415, -90.364277, -90.358138, -90.352, -90.345861, -90.345998, -90.346135, -90.346272, -90.346408, -90.346545, -90.346682, -90.346818, -90.346955, -90.353091, -90.359227, -90.365363, -90.371499, -90.377635, -90.383771, -90.389907, -90.396043, …
113	6837	G	NH16-10	Mississippi Canyon	44866	0	0	0	0	0	2304	0	0	2304	2304	0	0	1	0	NA	1	44866	0.184503	0.00211972	list(c(-88.265987, -88.272102, -88.272166, -88.27223, -88.272294, -88.272359, -88.272423, -88.272487, -88.272552, -88.272616, -88.266499, -88.260382, -88.254265, -88.248148, -88.24203, -88.235913, -88.229796, -88.223679, -88.223617, -88.223555, -88.223493, -88.223431, -88.223369, -88.223308, -88.223246, -88.223184, -88.229299, -88.235413, -88.241528, -88.247643, -88.253758, -88.259872, -88.265987…
114	6664	G	NH15-12	Ewing Bank	44866	0	0	0	0	0	2304	0	0	2304	2304	0	0	1	0	NA	1	44866	0.184591	0.00212161	list(c(-91.334494, -91.334579, -91.3407, -91.34682, -91.352941, -91.359062, -91.365183, -91.371304, -91.377425, -91.383546, -91.383464, -91.383381, -91.383299, -91.383217, -91.383135, -91.383053, -91.382971, -91.382888, -91.376765, -91.370642, -91.364518, -91.358395, -91.352272, -91.346148, -91.340025, -91.333902, -91.333986, -91.334071, -91.334156, -91.334241, -91.334325, -91.33441, -91.334494, …
115	6383	G	NG14-06	Port Isabel	44866	0	0	0	0	0	2304	0	0	2304	2304	0	0	1	0	NA	1	44866	0.182995	0.00208696	list(c(-96.444738, -96.444859, -96.45088, -96.456902, -96.462923, -96.468945, -96.474967, -96.480988, -96.48701, -96.493032, -96.492913, -96.492795, -96.492677, -96.492559, -96.49244, -96.492322, -96.492204, -96.492085, -96.486061, -96.480037, -96.474013, -96.46799, -96.461966, -96.455942, -96.449918, -96.443894, -96.444015, -96.444136, -96.444256, -96.444377, -96.444497, -96.444618, -96.444738, …
116	7090	G	NG15-03	Green Canyon	44866	0	0	0	0	0	2304	0	0	2304	2304	0	0	1	0	NA	1	44866	0.183272	0.00209293	list(c(-90.097663, -90.097802, -90.103842, -90.109882, -90.115922, -90.121963, -90.128003, -90.134043, -90.140083, -90.146123, -90.145987, -90.14585, -90.145713, -90.145576, -90.145439, -90.145302, -90.145165, -90.145028, -90.138986, -90.132943, -90.126901, -90.120858, -90.114816, -90.108773, -90.102731, -90.096689, -90.096828, -90.096967, -90.097107, -90.097246, -90.097385, -90.097524, -90.09766…
117	6837	G	NH15-11	Bouma Bank	44866	0	0	0	0	0	2304	0	0	2304	2304	0	0	1	0	NA	1	44866	0.184525	0.00212024	list(c(-92.168151, -92.168193, -92.174309, -92.180425, -92.18654, -92.192656, -92.198772, -92.204888, -92.211003, -92.217119, -92.21708, -92.21704, -92.217, -92.216961, -92.216921, -92.216882, -92.216842, -92.216802, -92.210684, -92.204566, -92.198448, -92.192329, -92.186211, -92.180093, -92.173975, -92.167857, -92.167899, -92.167941, -92.167983, -92.168025, -92.168067, -92.168109, -92.168151, 28…
118	7136	G	NG15-03	Green Canyon	44866	0	0	0	0	0	2304	0	0	2304	2304	0	0	1	0	NA	1	44866	0.183264	0.00209277	list(c(-90.292009, -90.292139, -90.298178, -90.304217, -90.310256, -90.316295, -90.322334, -90.328373, -90.334412, -90.340451, -90.340324, -90.340196, -90.340069, -90.339942, -90.339814, -90.339687, -90.33956, -90.339432, -90.333391, -90.327349, -90.321308, -90.315266, -90.309225, -90.303184, -90.297143, -90.291101, -90.291231, -90.291361, -90.291491, -90.29162, -90.29175, -90.29188, -90.292009, …
119	6268	G	NG15-03	Green Canyon	44866	0	0	0	0	0	2304	0	0	2304	2304	0	0	1	0	NA	1	44866	0.183995	0.0021087	list(c(-91.149788, -91.14988, -91.155963, -91.162046, -91.16813, -91.174213, -91.180297, -91.18638, -91.192464, -91.198547, -91.198458, -91.198369, -91.19828, -91.198191, -91.198102, -91.198013, -91.197924, -91.197834, -91.191748, -91.185663, -91.179577, -91.173491, -91.167405, -91.161319, -91.155233, -91.149148, -91.149239, -91.149331, -91.149422, -91.149514, -91.149605, -91.149697, -91.149788, …
120	6190	G	NH15-10	Bay City	44866	0	0	0	0	0	2304	0	0	2304	2304	0	0	1	0	NA	1	44866	0.185026	0.00213105	list(c(-94.125195, -94.131343, -94.131402, -94.13146, -94.131519, -94.131577, -94.131636, -94.131694, -94.131753, -94.131812, -94.125661, -94.119511, -94.113361, -94.107211, -94.101061, -94.09491, -94.08876, -94.08261, -94.082554, -94.082498, -94.082442, -94.082386, -94.08233, -94.082274, -94.082218, -94.082162, -94.088309, -94.094457, -94.100605, -94.106752, -94.1129, -94.119048, -94.125195, 28.…
121	6919	G	NG14-03	Corpus Christi	44866	0	0	0	774.2191093008079	0	2304	0	2	1529.7808906991922	2304	0	0	1	0	NA	1	44866	0.183505	0.00209809	list(c(-97.110737, -97.110828, -97.11688, -97.122933, -97.128985, -97.135038, -97.14109, -97.147143, -97.153195, -97.159248, -97.159159, -97.15907, -97.158981, -97.158893, -97.158804, -97.158715, -97.158626, -97.158537, -97.152482, -97.146427, -97.140372, -97.134317, -97.128263, -97.122208, -97.116153, -97.110098, -97.11019, -97.110281, -97.110372, -97.110463, -97.110555, -97.110646, -97.110737, …
122	6352	G	NG15-03	Green Canyon	44866	0	0	0	0	0	2304	0	0	2304	2304	0	0	1	0	NA	1	44866	0.183976	0.00210834	list(c(-91.929519, -91.929572, -91.935653, -91.941734, -91.947815, -91.953896, -91.959978, -91.966059, -91.97214, -91.978221, -91.978171, -91.978121, -91.97807, -91.97802, -91.977969, -91.977919, -91.977869, -91.977818, -91.971735, -91.965651, -91.959567, -91.953484, -91.9474, -91.941317, -91.935233, -91.92915, -91.929202, -91.929255, -91.929308, -91.929361, -91.929414, -91.929466, -91.929519, 27…
123	6768	G	NG15-02	Garden Banks	44866	0	0	0	0	0	2304	0	0	2304	2304	0	0	1	0	NA	1	44866	0.183704	0.00210248	list(c(-93.139458, -93.145522, -93.145529, -93.145536, -93.145543, -93.14555, -93.145557, -93.145564, -93.145571, -93.145578, -93.139512, -93.133447, -93.127381, -93.121315, -93.115249, -93.109184, -93.103118, -93.097052, -93.097047, -93.097043, -93.097038, -93.097033, -93.097029, -93.097024, -93.097019, -93.097014, -93.103078, -93.109141, -93.115205, -93.121268, -93.127331, -93.133395, -93.13945…
124	6654	G	NH16-10	Mississippi Canyon	44866	0	0	0	0	0	2304	0	0	2304	2304	0	0	1	0	NA	1	44866	0.184453	0.00211844	list(c(-89.882875, -89.888989, -89.889136, -89.889283, -89.889429, -89.889576, -89.889723, -89.889869, -89.890016, -89.890163, -89.884046, -89.877929, -89.871812, -89.865695, -89.859578, -89.853461, -89.847344, -89.841227, -89.841083, -89.840938, -89.840794, -89.84065, -89.840506, -89.840361, -89.840217, -89.840073, -89.846188, -89.852303, -89.858417, -89.864532, -89.870646, -89.876761, -89.88287…
125	6819	G	NG14-03	Corpus Christi	44866	0	0	0	1754.4933406534851	0	2304	0	2	549.5066593465151	2304	0	0	1	0	NA	1	44866	0.183579	0.00209967	list(c(-97.109276, -97.109367, -97.115424, -97.121481, -97.127538, -97.133595, -97.139653, -97.14571, -97.151767, -97.157824, -97.157735, -97.157646, -97.157557, -97.157467, -97.157378, -97.157289, -97.157199, -97.15711, -97.151051, -97.144991, -97.138931, -97.132872, -97.126812, -97.120753, -97.114694, -97.108634, -97.108726, -97.108818, -97.108909, -97.109001, -97.109092, -97.109184, -97.109276…
126	6490	G	NG14-03	Corpus Christi	44866	0	0	0	0	0	2304	0	0	2304	2304	0	0	1	0	NA	1	44866	0.183718	0.00210255	list(c(-96.083129, -96.083272, -96.083415, -96.083558, -96.083701, -96.083844, -96.083987, -96.08413, -96.084273, -96.090341, -96.096409, -96.102477, -96.108545, -96.114614, -96.120682, -96.12675, -96.132819, -96.132678, -96.132538, -96.132397, -96.132256, -96.132116, -96.131975, -96.131834, -96.131694, -96.125623, -96.119552, -96.113482, -96.107411, -96.10134, -96.09527, -96.089199, -96.083129, …
127	6863	G	NH15-09	New Orleans	44866	0	0	0	1544.1383367592218	0	2304	0	2	759.862	2304.0000000000045	0	0	1	0	NA	1	44866	0.185358	0.00213817	list(c(-91.37072, -91.370805, -91.376974, -91.383143, -91.389313, -91.395482, -91.401651, -91.40782, -91.41399, -91.420159, -91.420076, -91.419993, -91.41991, -91.419827, -91.419744, -91.419661, -91.419577, -91.419494, -91.413322, -91.407151, -91.400979, -91.394807, -91.388635, -91.382463, -91.376292, -91.37012, -91.370206, -91.370291, -91.370377, -91.370463, -91.370548, -91.370634, -91.37072, 29…
128	6358	G	NH15-11	Bouma Bank	44866	0	0	0	0	0	2304	0	0	2304	2304	0	0	1	0	NA	1	44866	0.184888	0.00212807	list(c(-93.632298, -93.638436, -93.638469, -93.638502, -93.638534, -93.638567, -93.6386, -93.638633, -93.638666, -93.638699, -93.632558, -93.626417, -93.620276, -93.614134, -93.607993, -93.601852, -93.595711, -93.58957, -93.58954, -93.58951, -93.589479, -93.589449, -93.589419, -93.589388, -93.589358, -93.589328, -93.595466, -93.601605, -93.607743, -93.613882, -93.620021, -93.626159, -93.632298, 2…
129	6172	G	NH16-10	Mississippi Canyon	44866	0	0	0	0	0	2304	0	0	2304	2304	0	0	1	0	NA	1	44866	0.184958	0.00212947	list(c(-89.010245, -89.016389, -89.016494, -89.016598, -89.016702, -89.016806, -89.016911, -89.017015, -89.01712, -89.017224, -89.011077, -89.00493, -88.998783, -88.992636, -88.986489, -88.980342, -88.974195, -88.968048, -88.967946, -88.967844, -88.967742, -88.96764, -88.967538, -88.967437, -88.967335, -88.967233, -88.973378, -88.979522, -88.985667, -88.991812, -88.997956, -89.004101, -89.010245,…
130	6623	G	NG14-03	Corpus Christi	44866	0	0	0	0	0	2304	0	0	2304	2304	0	0	1	0	NA	1	44866	0.183709	0.00210245	list(c(-96.912312, -96.918378, -96.924444, -96.930509, -96.936575, -96.942641, -96.948706, -96.954772, -96.960838, -96.960738, -96.960639, -96.96054, -96.96044, -96.96034, -96.960241, -96.960141, -96.960042, -96.953973, -96.947905, -96.941837, -96.935769, -96.929701, -96.923633, -96.917565, -96.911497, -96.911599, -96.911701, -96.911803, -96.911905, -96.912007, -96.912109, -96.91221, -96.912312, …
131	6841	G	NG15-03	Green Canyon	44866	0	0	0	0	0	2304	0	0	2304	2304	0	0	1	0	NA	1	44866	0.18345	0.00209675	list(c(-90.043655, -90.043798, -90.049849, -90.0559, -90.061952, -90.068003, -90.074055, -90.080106, -90.086158, -90.092209, -90.092069, -90.091928, -90.091787, -90.091646, -90.091506, -90.091365, -90.091224, -90.091083, -90.085029, -90.078975, -90.072921, -90.066868, -90.060814, -90.05476, -90.048707, -90.042653, -90.042796, -90.042939, -90.043083, -90.043226, -90.043369, -90.043512, -90.043655,…
132	7115	G	NG15-01	East Breaks	44866	0	0	0	0	0	2304	0	0	2304	2304	0	0	1	0	NA	1	44866	0.183308	0.00209376	list(c(-95.321301, -95.327342, -95.333383, -95.339424, -95.345465, -95.351506, -95.357547, -95.363588, -95.369629, -95.369742, -95.369856, -95.369969, -95.370083, -95.370196, -95.37031, -95.370423, -95.370537, -95.364494, -95.358451, -95.352407, -95.346364, -95.340321, -95.334278, -95.328234, -95.322191, -95.32208, -95.321968, -95.321857, -95.321746, -95.321635, -95.321524, -95.321412, -95.321301…
133	6784	G	NG14-06	Port Isabel	44866	0	0	0	0	0	2304	0	0	2304	2304	0	0	1	0	NA	1	44866	0.182704	0.00208067	list(c(-96.404348, -96.404469, -96.410472, -96.416475, -96.422479, -96.428482, -96.434486, -96.440489, -96.446492, -96.452496, -96.452378, -96.452259, -96.452141, -96.452023, -96.451904, -96.451786, -96.451667, -96.451549, -96.445543, -96.439537, -96.433532, -96.427526, -96.421521, -96.415515, -96.409509, -96.403504, -96.403625, -96.403745, -96.403866, -96.403987, -96.404107, -96.404228, -96.4043…
134	6564	G	NG15-03	Green Canyon	44866	0	0	0	0	0	2304	0	0	2304	2304	0	0	1	0	NA	1	44866	0.183787	0.0021042	list(c(-91.348378, -91.348459, -91.354529, -91.360598, -91.366668, -91.372738, -91.378808, -91.384878, -91.390948, -91.397018, -91.39694, -91.396861, -91.396783, -91.396704, -91.396626, -91.396547, -91.396469, -91.396391, -91.390318, -91.384246, -91.378174, -91.372101, -91.366029, -91.359957, -91.353885, -91.347812, -91.347893, -91.347974, -91.348055, -91.348136, -91.348217, -91.348297, -91.34837…
135	6620	G	NG15-03	Green Canyon	44866	0	0	0	0	0	2304	0	0	2304	2304	0	0	1	0	NA	1	44866	0.183723	0.00210279	list(c(-91.0578, -91.057895, -91.063961, -91.070027, -91.076093, -91.08216, -91.088226, -91.094293, -91.100359, -91.106425, -91.106333, -91.106241, -91.106148, -91.106056, -91.105963, -91.105871, -91.105778, -91.105686, -91.099617, -91.093548, -91.087479, -91.081411, -91.075342, -91.069273, -91.063205, -91.057136, -91.057231, -91.057326, -91.057421, -91.057516, -91.05761, -91.057705, -91.0578, 27…
136	6270	G	NG14-06	Port Isabel	44866	0	0	0	731.598	0	2304	0	2	1572.4018915235722	2304	0	0	1	0	NA	1	44866	0.183137	0.0020901	list(c(-97.06971, -97.069801, -97.075831, -97.08186, -97.087889, -97.093918, -97.099947, -97.105977, -97.112006, -97.118035, -97.117946, -97.117857, -97.117768, -97.117679, -97.11759, -97.1175, -97.117411, -97.117322, -97.11129, -97.105259, -97.099227, -97.093196, -97.087164, -97.081133, -97.075101, -97.06907, -97.069161, -97.069253, -97.069344, -97.069436, -97.069527, -97.069619, -97.06971, 26.7…
137	7051	G	NG15-03	Green Canyon	44866	0	0	0	0	0	2304	0	0	2304	2304	0	0	1	0	NA	1	44866	0.183456	0.00209713	list(c(-91.98372, -91.983769, -91.989817, -91.995866, -92.001914, -92.007962, -92.01401, -92.020059, -92.026107, -92.032155, -92.032109, -92.032062, -92.032016, -92.031969, -92.031923, -92.031876, -92.03183, -92.031783, -92.025733, -92.019682, -92.013631, -92.007581, -92.00153, -91.99548, -91.989429, -91.983379, -91.983427, -91.983476, -91.983525, -91.983574, -91.983623, -91.983671, -91.98372, 27…
138	6585	G	NG14-06	Port Isabel	44866	0	0	0	0	0	2304	0	0	2304	2304	0	0	1	0	NA	1	44866	0.182839	0.0020836	list(c(-96.351508, -96.351632, -96.351756, -96.35188, -96.352004, -96.352128, -96.352252, -96.352376, -96.3525, -96.358512, -96.364524, -96.370536, -96.376548, -96.38256, -96.388572, -96.394584, -96.400596, -96.400475, -96.400353, -96.400231, -96.40011, -96.399988, -96.399866, -96.399744, -96.399623, -96.393608, -96.387594, -96.381579, -96.375565, -96.369551, -96.363537, -96.357522, -96.351508, 2…
139	6781	G	NG14-06	Port Isabel	44866	0	0	0	0	0	2304	0	0	2304	2304	0	0	1	0	NA	1	44866	0.182723	0.00208107	list(c(-96.548443, -96.548556, -96.55456, -96.560564, -96.566569, -96.572573, -96.578577, -96.584581, -96.590585, -96.59659, -96.596478, -96.596366, -96.596255, -96.596143, -96.596031, -96.59592, -96.595808, -96.595696, -96.58969, -96.583683, -96.577677, -96.57167, -96.565664, -96.559657, -96.553651, -96.547645, -96.547759, -96.547873, -96.547987, -96.548101, -96.548215, -96.548329, -96.548443, 2…
140	6616	G	NH15-08	Port Arthur	44866	0	0	0	0	0	2304	0	0	2304	2304	0	0	1	0	NA	1	44866	0.185627	0.00214408	list(c(-93.241225, -93.24741, -93.247423, -93.247436, -93.247449, -93.247462, -93.247476, -93.247489, -93.247502, -93.247515, -93.241327, -93.235139, -93.228952, -93.222764, -93.216576, -93.210388, -93.2042, -93.198012, -93.198002, -93.197991, -93.197981, -93.19797, -93.19796, -93.197949, -93.197939, -93.197928, -93.204113, -93.210299, -93.216484, -93.222669, -93.228854, -93.23504, -93.241225, 29…
141	6130	G	NG15-02	Garden Banks	44866	0	0	0	0	0	2304	0	0	2304	2304	0	0	1	0	NA	1	44866	0.184189	0.00211298	list(c(-92.512426, -92.51245, -92.518545, -92.524639, -92.530733, -92.536827, -92.542921, -92.549016, -92.55511, -92.561204, -92.561182, -92.561161, -92.561139, -92.561117, -92.561095, -92.561073, -92.561051, -92.561029, -92.554933, -92.548836, -92.542739, -92.536643, -92.530546, -92.52445, -92.518353, -92.512256, -92.512281, -92.512305, -92.512329, -92.512353, -92.512378, -92.512402, -92.512426,…
142	7021	G	NG15-03	Green Canyon	44866	0	0	0	0	0	2304	0	0	2304	2304	0	0	1	0	NA	1	44866	0.183423	0.00209628	list(c(-91.015427, -91.015522, -91.02157, -91.027617, -91.033664, -91.039712, -91.045759, -91.051807, -91.057854, -91.063902, -91.063809, -91.063715, -91.063622, -91.063529, -91.063436, -91.063343, -91.06325, -91.063157, -91.057107, -91.051057, -91.045007, -91.038957, -91.032908, -91.026858, -91.020808, -91.014759, -91.014854, -91.01495, -91.015045, -91.015141, -91.015236, -91.015331, -91.015427,…
143	6127	G	NH15-10	Bay City	44866	0	0	0	0	0	2304	0	0	2304	2304	0	0	1	0	NA	1	44866	0.185021	0.00213086	list(c(-94.765177, -94.771325, -94.771416, -94.771508, -94.7716, -94.771692, -94.771784, -94.771875, -94.771967, -94.772059, -94.765909, -94.759758, -94.753607, -94.747457, -94.741306, -94.735155, -94.729005, -94.722854, -94.722765, -94.722675, -94.722586, -94.722497, -94.722407, -94.722318, -94.722229, -94.72214, -94.728288, -94.734436, -94.740584, -94.746732, -94.752881, -94.759029, -94.765177,…
144	7112	G	NH15-12	Ewing Bank	44866	0	0	0	0	0	2304	0	0	2304	2304	0	0	1	0	NA	1	44866	0.18425	0.00211422	list(c(-91.438188, -91.444287, -91.450386, -91.456485, -91.462584, -91.468683, -91.474782, -91.480881, -91.48698, -91.486905, -91.486829, -91.486753, -91.486678, -91.486602, -91.486526, -91.486451, -91.486375, -91.480273, -91.474172, -91.46807, -91.461969, -91.455867, -91.449766, -91.443664, -91.437563, -91.437641, -91.437719, -91.437797, -91.437875, -91.437954, -91.438032, -91.43811, -91.438188,…
145	6622	G	NH15-12	Ewing Bank	44866	0	0	0	0	0	2304	0	0	2304	2304	0	0	1	0	NA	1	44866	0.184596	0.00212164	list(c(-90.941962, -90.942066, -90.948188, -90.954309, -90.960431, -90.966553, -90.972674, -90.978796, -90.984918, -90.99104, -90.990938, -90.990835, -90.990733, -90.990631, -90.990529, -90.990426, -90.990324, -90.990221, -90.984097, -90.977973, -90.971849, -90.965725, -90.9596, -90.953476, -90.947352, -90.941228, -90.941333, -90.941438, -90.941543, -90.941647, -90.941752, -90.941857, -90.941962,…
146	6032	G	NH15-12	Ewing Bank	44866	0	0	0	486.8243313033307	0	2304	0	2	1817.1756686966696	2304.0000000000005	0	0	1	0	NA	1	44866	0.185016	0.00213066	list(c(-90.439712, -90.439845, -90.445994, -90.452143, -90.458292, -90.464442, -90.470591, -90.47674, -90.48289, -90.489039, -90.488909, -90.488778, -90.488648, -90.488517, -90.488387, -90.488256, -90.488125, -90.487995, -90.481843, -90.475691, -90.469539, -90.463387, -90.457235, -90.451083, -90.444932, -90.43878, -90.438913, -90.439046, -90.43918, -90.439313, -90.439446, -90.439579, -90.439712, …
147	6333	G	NG15-01	East Breaks	44866	0	0	0	0	0	2304	0	0	2304	2304	0	0	1	0	NA	1	44866	0.183988	0.00210854	list(c(-94.502738, -94.50882, -94.508894, -94.508969, -94.509043, -94.509118, -94.509192, -94.509267, -94.509341, -94.509416, -94.503331, -94.497247, -94.491162, -94.485077, -94.478992, -94.472908, -94.466823, -94.460738, -94.460666, -94.460594, -94.460522, -94.46045, -94.460377, -94.460305, -94.460233, -94.460161, -94.466244, -94.472326, -94.478408, -94.484491, -94.490573, -94.496655, -94.502738…
148	6863	G	NG15-01	East Breaks	44866	0	0	0	0	0	2304	0	0	2304	2304	0	0	1	0	NA	1	44866	0.183478	0.00209744	list(c(-95.464972, -95.471024, -95.471143, -95.471263, -95.471382, -95.471501, -95.471621, -95.47174, -95.47186, -95.47198, -95.465925, -95.459871, -95.453817, -95.447762, -95.441708, -95.435654, -95.429599, -95.423545, -95.423428, -95.42331, -95.423193, -95.423076, -95.422959, -95.422842, -95.422725, -95.422608, -95.42866, -95.434712, -95.440764, -95.446816, -95.452868, -95.45892, -95.464972, 27…
149	6856	G	NH15-10	Bay City	44866	0	0	0	0	0	2304	0	0	2304	2304	0	0	1	0	NA	1	44866	0.184311	0.00211535	list(c(-95.780539, -95.786644, -95.786785, -95.786925, -95.787065, -95.787206, -95.787346, -95.787487, -95.787627, -95.787768, -95.78166, -95.775553, -95.769445, -95.763337, -95.75723, -95.751122, -95.745014, -95.738906, -95.738768, -95.73863, -95.738492, -95.738354, -95.738216, -95.738078, -95.73794, -95.737802, -95.743907, -95.750013, -95.756118, -95.762223, -95.768329, -95.774434, -95.780539, …
150	6933	G	NH15-07	Houston	44866	0	0	0	0	0	2304	0	0	2304	2304	0	0	1	0	NA	1	44866	0.185332	0.00213762	list(c(-94.425003, -94.43117, -94.431245, -94.43132, -94.431395, -94.431471, -94.431546, -94.431621, -94.431696, -94.431771, -94.425601, -94.419432, -94.413262, -94.407092, -94.400922, -94.394752, -94.388582, -94.382412, -94.382339, -94.382267, -94.382194, -94.382122, -94.382049, -94.381976, -94.381904, -94.381832, -94.387999, -94.394166, -94.400334, -94.406501, -94.412668, -94.418836, -94.425003…
151	6777	G	NH15-12	Ewing Bank	44866	0	0	0	0	0	2304	0	0	2304	2304	0	0	1	0	NA	1	44866	0.184452	0.00211848	list(c(-90.699912, -90.700028, -90.706141, -90.712254, -90.718367, -90.72448, -90.730593, -90.736706, -90.742819, -90.748933, -90.748819, -90.748705, -90.748591, -90.748477, -90.748363, -90.748249, -90.748135, -90.748021, -90.741905, -90.73579, -90.729674, -90.723559, -90.717443, -90.711328, -90.705212, -90.699097, -90.699213, -90.69933, -90.699446, -90.699563, -90.699679, -90.699796, -90.699912,…
152	6490	G	NH15-11	Bouma Bank	44866	0	0	0	0	0	2304	0	0	2304	2304	0	0	1	0	NA	1	44866	0.184794	0.00212604	list(c(-92.01858, -92.01863, -92.024763, -92.030896, -92.037029, -92.043161, -92.049294, -92.055427, -92.06156, -92.067693, -92.067645, -92.067598, -92.06755, -92.067502, -92.067454, -92.067407, -92.067359, -92.067311, -92.061176, -92.05504, -92.048905, -92.042769, -92.036634, -92.030499, -92.024363, -92.018228, -92.018278, -92.018329, -92.018379, -92.018429, -92.018479, -92.01853, -92.01858, 28.…
153	7029	G	NH15-07	Houston	44866	0	0	0	0	0	2304	0	0	2304	2304	0	0	1	0	NA	1	44866	0.185235	0.00213552	list(c(-94.578516, -94.578433, -94.578351, -94.578268, -94.578186, -94.578103, -94.578021, -94.577938, -94.577856, -94.584017, -94.590179, -94.59634, -94.602502, -94.608663, -94.614825, -94.620986, -94.627148, -94.627233, -94.627318, -94.627403, -94.627488, -94.627573, -94.627658, -94.627743, -94.627828, -94.621665, -94.615501, -94.609337, -94.603172, -94.597008, -94.590844, -94.58468, -94.578516…
154	6558	G	NH15-12	Ewing Bank	44866	0	0	0	0	0	2304	0	0	2304	2304	0	0	1	0	NA	1	44866	0.184694	0.00212383	list(c(-91.627213, -91.627283, -91.63341, -91.639537, -91.645664, -91.651791, -91.657917, -91.664044, -91.670171, -91.676298, -91.676231, -91.676163, -91.676096, -91.676028, -91.675961, -91.675893, -91.675825, -91.675758, -91.669628, -91.663499, -91.65737, -91.65124, -91.645111, -91.638982, -91.632852, -91.626723, -91.626793, -91.626863, -91.626933, -91.627003, -91.627073, -91.627143, -91.627213,…
155	7027	G	NG15-02	Garden Banks	44866	0	0	0	0	0	2304	0	0	2304	2304	0	0	1	0	NA	1	44866	0.183516	0.00209844	list(c(-92.661091, -92.661107, -92.667159, -92.67321, -92.679262, -92.685313, -92.691365, -92.697417, -92.703468, -92.70952, -92.709506, -92.709492, -92.709478, -92.709464, -92.70945, -92.709436, -92.709422, -92.709408, -92.703354, -92.6973, -92.691246, -92.685192, -92.679138, -92.673084, -92.66703, -92.660977, -92.660993, -92.661009, -92.661025, -92.661042, -92.661058, -92.661074, -92.661091, 27…
156	6728	G	NG14-03	Corpus Christi	44866	0	0	0	0	0	2304	0	0	2304	2304	0	0	1	0	NA	1	44866	0.183607	0.00210023	list(c(-96.671413, -96.671526, -96.677585, -96.683645, -96.689705, -96.695765, -96.701824, -96.707884, -96.713944, -96.720004, -96.719893, -96.719783, -96.719672, -96.719561, -96.71945, -96.719339, -96.719228, -96.719117, -96.713055, -96.706993, -96.70093, -96.694868, -96.688806, -96.682744, -96.676682, -96.67062, -96.670733, -96.670847, -96.67096, -96.671073, -96.671186, -96.671299, -96.671413, …
157	6927	G	NH16-07	Viosca Knoll	44866	0	0	0	0	0	2304	0	0	2304	2304	0	0	1	0	NA	1	44866	0.18531	0.0021371	list(c(-88.721006, -88.727172, -88.727263, -88.727354, -88.727444, -88.727535, -88.727626, -88.727716, -88.727807, -88.727898, -88.721729, -88.71556, -88.709391, -88.703223, -88.697054, -88.690885, -88.684716, -88.678547, -88.678459, -88.678371, -88.678283, -88.678195, -88.678107, -88.678018, -88.67793, -88.677842, -88.684009, -88.690175, -88.696341, -88.702508, -88.708674, -88.71484, -88.721006,…
158	6251	G	NH15-11	Bouma Bank	44866	0	0	0	0	0	2304	0	0	2304	2304	0	0	1	0	NA	1	44866	0.184954	0.0021295	list(c(-93.976841, -93.982984, -93.983034, -93.983085, -93.983136, -93.983186, -93.983237, -93.983288, -93.983339, -93.983389, -93.977244, -93.971098, -93.964953, -93.958807, -93.952662, -93.946516, -93.940371, -93.934225, -93.934177, -93.934129, -93.934081, -93.934033, -93.933984, -93.933936, -93.933888, -93.93384, -93.939983, -93.946126, -93.952269, -93.958412, -93.964555, -93.970698, -93.97684…
159	6725	G	NH15-08	Port Arthur	44866	0	0	0	0	0	2304	0	0	2304	2304	0	0	1	0	NA	1	44866	0.185545	0.00214231	list(c(-92.752786, -92.752799, -92.758979, -92.765159, -92.771339, -92.777519, -92.783699, -92.789879, -92.796059, -92.802239, -92.802229, -92.802218, -92.802208, -92.802197, -92.802187, -92.802177, -92.802166, -92.802156, -92.795973, -92.78979, -92.783608, -92.777425, -92.771243, -92.76506, -92.758877, -92.752695, -92.752708, -92.752721, -92.752734, -92.752747, -92.75276, -92.752773, -92.752786,…
160	6471	G	NH15-12	Ewing Bank	44866	0	0	0	0	0	2304	0	0	2304	2304	0	0	1	0	NA	1	44866	0.184719	0.00212431	list(c(-90.988477, -90.98858, -90.994709, -91.000838, -91.006968, -91.013097, -91.019226, -91.025356, -91.031485, -91.037615, -91.037514, -91.037414, -91.037314, -91.037213, -91.037113, -91.037012, -91.036912, -91.036811, -91.030679, -91.024547, -91.018415, -91.012283, -91.006152, -91.00002, -90.993888, -90.987756, -90.987859, -90.987962, -90.988065, -90.988168, -90.988271, -90.988374, -90.988477…
161	6329	G	NH16-10	Mississippi Canyon	44866	0	0	0	0	0	2304	0	0	2304	2304	0	0	1	0	NA	1	44866	0.184869	0.0021276	list(c(-88.664055, -88.670193, -88.670279, -88.670365, -88.670451, -88.670537, -88.670623, -88.670709, -88.670795, -88.670881, -88.66474, -88.658599, -88.652458, -88.646318, -88.640177, -88.634036, -88.627895, -88.621754, -88.62167, -88.621587, -88.621503, -88.62142, -88.621336, -88.621253, -88.62117, -88.621086, -88.627225, -88.633363, -88.639502, -88.64564, -88.651778, -88.657917, -88.664055, 2…
162	7016	G	NH15-10	Bay City	44866	0	0	0	0	0	2304	0	0	2304	2304	0	0	1	0	NA	1	44866	0.184259	0.00211429	list(c(-95.289245, -95.295346, -95.295461, -95.295576, -95.295691, -95.295806, -95.295921, -95.296036, -95.296152, -95.296267, -95.290164, -95.284061, -95.277957, -95.271854, -95.265751, -95.259648, -95.253544, -95.247441, -95.247328, -95.247215, -95.247103, -95.24699, -95.246877, -95.246765, -95.246652, -95.246539, -95.25264, -95.258741, -95.264842, -95.270943, -95.277044, -95.283144, -95.289245…
163	6780	G	NH15-12	Ewing Bank	44866	0	0	0	0	0	2304	0	0	2304	2304	0	0	1	0	NA	1	44866	0.184435	0.00211808	list(c(-90.553204, -90.553328, -90.55944, -90.565552, -90.571664, -90.577777, -90.583889, -90.590001, -90.596113, -90.602226, -90.602105, -90.601983, -90.601862, -90.601741, -90.601619, -90.601498, -90.601376, -90.601255, -90.59514, -90.589025, -90.58291, -90.576796, -90.570681, -90.564566, -90.558452, -90.552337, -90.552461, -90.552585, -90.552709, -90.552833, -90.552957, -90.55308, -90.553204, …
164	6607	G	NG15-03	Green Canyon	44866	0	0	0	0	0	2304	0	0	2304	2304	0	0	1	0	NA	1	44866	0.183774	0.00210395	list(c(-91.688849, -91.688913, -91.694981, -91.70105, -91.707118, -91.713187, -91.719256, -91.725324, -91.731393, -91.737462, -91.7374, -91.737338, -91.737277, -91.737215, -91.737153, -91.737092, -91.73703, -91.736968, -91.730897, -91.724826, -91.718755, -91.712684, -91.706613, -91.700542, -91.694471, -91.6884, -91.688464, -91.688528, -91.688593, -91.688657, -91.688721, -91.688785, -91.688849, 27…
165	6332	G	NG15-03	Green Canyon	44866	0	0	0	0	0	2304	0	0	2304	2304	0	0	1	0	NA	1	44866	0.183884	0.00210618	list(c(-90.469599, -90.469723, -90.475801, -90.481879, -90.487956, -90.494034, -90.500112, -90.506189, -90.512267, -90.518345, -90.518223, -90.5181, -90.517978, -90.517856, -90.517733, -90.517611, -90.517488, -90.517365, -90.511285, -90.505205, -90.499125, -90.493045, -90.486965, -90.480885, -90.474805, -90.468725, -90.46885, -90.468975, -90.469099, -90.469224, -90.469349, -90.469474, -90.469599,…
166	6192	G	NH15-12	Ewing Bank	44866	0	0	0	0	0	16.5258	0	0	16.525781351681513	16.525781351681513	0	0	0	0	NA	1	44866	0.0661936	1.52578105e-5	list(c(-90, -90, -90.000934, -90.00078, -90.000625, -90.00047, -90.000315, -90.00016, -90, -90, -90, -90, -90, -90, -90, -90, -90, -90, -90, -90, -90, -90, -90, -90, -90, -90, -90, -90, -90, -90, -90, -90, -90, -90, -90, -90, -90, -90, -90, -90, -90, -90, -90, -90, -90, -90, -90, -90, -90, -90, -90, -90, -90, -90, -90, -90, -90, -90, -90, -90, -90, -90, -90, -90, -90, -90, -90, -90, -90, -90, -90…
167	6009	G	NG15-01	East Breaks	44866	0	0	0	0	0	2304	0	0	2304	2304	0	0	1	0	NA	1	44866	0.184092	0.00211068	list(c(-95.68357, -95.677476, -95.671383, -95.665289, -95.659195, -95.653102, -95.647008, -95.640914, -95.63482, -95.634689, -95.634557, -95.634426, -95.634295, -95.634163, -95.634032, -95.633901, -95.63377, -95.639861, -95.645952, -95.652044, -95.658135, -95.664226, -95.670317, -95.676409, -95.6825, -95.682633, -95.682767, -95.682901, -95.683035, -95.683168, -95.683302, -95.683436, -95.68357, 27…
168	6336	G	NG14-06	Port Isabel	44866	0	0	0	0	0	2304	0	0	2304	2304	0	0	1	0	NA	1	44866	0.183011	0.00208731	list(c(-96.299207, -96.299335, -96.305358, -96.311381, -96.317404, -96.323427, -96.32945, -96.335473, -96.341496, -96.347519, -96.347394, -96.347269, -96.347143, -96.347018, -96.346893, -96.346767, -96.346642, -96.346516, -96.340491, -96.334465, -96.32844, -96.322415, -96.316389, -96.310364, -96.304339, -96.298314, -96.298442, -96.298569, -96.298697, -96.298825, -96.298952, -96.29908, -96.299207,…
169	6463	G	NG15-01	East Breaks	44866	0	0	0	0	0	2304	0	0	2304	2304	0	0	1	0	NA	1	44866	0.183778	0.00210388	list(c(-95.472659, -95.47873, -95.478851, -95.478973, -95.479094, -95.479216, -95.479337, -95.479459, -95.479581, -95.479703, -95.473629, -95.467556, -95.461483, -95.45541, -95.449337, -95.443264, -95.43719, -95.431117, -95.430998, -95.430878, -95.430759, -95.43064, -95.43052, -95.430401, -95.430282, -95.430163, -95.436234, -95.442305, -95.448376, -95.454447, -95.460517, -95.466588, -95.472659, 2…
170	6232	G	NH16-10	Mississippi Canyon	44866	0	0	0	0	0	2304	0	0	2304	2304	0	0	1	0	NA	1	44866	0.184961	0.00212958	list(c(-88.51798, -88.524124, -88.524202, -88.524281, -88.52436, -88.524439, -88.524517, -88.524596, -88.524675, -88.524754, -88.518607, -88.512461, -88.506314, -88.500168, -88.494021, -88.487875, -88.481728, -88.475582, -88.475505, -88.475429, -88.475353, -88.475277, -88.475201, -88.475124, -88.475048, -88.474972, -88.481116, -88.48726, -88.493404, -88.499548, -88.505692, -88.511836, -88.51798, …
171	6273	G	NH15-12	Ewing Bank	44866	0	0	0	0	0	2304	0	0	2304	2304	0	0	1	0	NA	1	44866	0.184868	0.00212752	list(c(-90.936161, -90.936054, -90.935948, -90.935842, -90.935735, -90.935629, -90.935522, -90.935416, -90.935309, -90.929168, -90.923026, -90.916885, -90.910743, -90.904602, -90.89846, -90.892319, -90.886177, -90.886286, -90.886395, -90.886504, -90.886613, -90.886722, -90.886831, -90.88694, -90.887049, -90.893188, -90.899327, -90.905465, -90.911604, -90.917743, -90.923882, -90.930022, -90.936161…
172	6055	G	NG15-01	East Breaks	44866	0	0	0	0	0	2304	0	0	2304	2304	0	0	1	0	NA	1	44866	0.18403	0.00210925	list(c(-95.870164, -95.876252, -95.876395, -95.876538, -95.876681, -95.876824, -95.876967, -95.87711, -95.877254, -95.877397, -95.871307, -95.865217, -95.859127, -95.853037, -95.846947, -95.840857, -95.834767, -95.828676, -95.828535, -95.828395, -95.828254, -95.828113, -95.827972, -95.827832, -95.827691, -95.82755, -95.833638, -95.839726, -95.845814, -95.851901, -95.857989, -95.864077, -95.870164…
173	6775	G	NH16-07	Viosca Knoll	44866	0	0	0	0	0	2304	0	0	2304	2304	0	0	1	0	NA	1	44866	0.185424	0.00213956	list(c(-88.821959, -88.828133, -88.828229, -88.828326, -88.828422, -88.828518, -88.828615, -88.828711, -88.828808, -88.828905, -88.822728, -88.816552, -88.810376, -88.8042, -88.798024, -88.791847, -88.785671, -88.779495, -88.779401, -88.779307, -88.779213, -88.779119, -88.779025, -88.778931, -88.778838, -88.778744, -88.784918, -88.791091, -88.797265, -88.803438, -88.809612, -88.815786, -88.821959…
174	6157	G	NH15-12	Ewing Bank	44866	0	0	0	0	0	2304	0	0	2304	2304	0	0	1	0	NA	1	44866	0.185014	0.00213077	list(c(-91.671392, -91.671461, -91.67153, -91.671598, -91.671667, -91.671736, -91.671805, -91.671873, -91.671942, -91.678089, -91.684236, -91.690383, -91.69653, -91.702677, -91.708825, -91.714972, -91.721119, -91.721053, -91.720987, -91.720921, -91.720854, -91.720788, -91.720722, -91.720656, -91.720589, -91.71444, -91.70829, -91.70214, -91.695991, -91.689841, -91.683691, -91.677542, -91.671392, 2…
175	6680	G	NH15-12	Ewing Bank	44866	0	0	0	0	0	2304	0	0	2304	2304	0	0	1	0	NA	1	44866	0.184513	0.00211978	list(c(-90.55122, -90.551344, -90.557461, -90.563578, -90.569696, -90.575813, -90.58193, -90.588047, -90.594165, -90.600282, -90.60016, -90.600038, -90.599916, -90.599795, -90.599673, -90.599551, -90.599429, -90.599307, -90.593187, -90.587067, -90.580947, -90.574828, -90.568708, -90.562588, -90.556469, -90.550349, -90.550474, -90.550598, -90.550723, -90.550847, -90.550971, -90.551096, -90.55122, …
176	6515	G	NH15-10	Bay City	44866	0	0	0	0	0	2304	0	0	2304	2304	0	0	1	0	NA	1	44866	0.184642	0.00212259	list(c(-95.347526, -95.353651, -95.353771, -95.353891, -95.354011, -95.354132, -95.354252, -95.354372, -95.354492, -95.354613, -95.348485, -95.342357, -95.33623, -95.330102, -95.323974, -95.317847, -95.311719, -95.305591, -95.305473, -95.305356, -95.305238, -95.30512, -95.305002, -95.304885, -95.304767, -95.304649, -95.310775, -95.3169, -95.323025, -95.32915, -95.335276, -95.341401, -95.347526, 2…
177	6388	G	NG15-01	East Breaks	44866	0	0	0	0	0	2304	0	0	2304	2304	0	0	1	0	NA	1	44866	0.183965	0.0021081	list(c(-94.258935, -94.265016, -94.265078, -94.265141, -94.265203, -94.265265, -94.265328, -94.26539, -94.265452, -94.265515, -94.259432, -94.253349, -94.247266, -94.241183, -94.2351, -94.229016, -94.222933, -94.21685, -94.21679, -94.21673, -94.21667, -94.21661, -94.21655, -94.21649, -94.21643, -94.216371, -94.222451, -94.228532, -94.234613, -94.240693, -94.246774, -94.252855, -94.258935, 27.6367…
178	6156	G	NG15-02	Garden Banks	44866	0	0	0	0	0	2304	0	8	2304	2304	0	0	1	0	NA	1	44866	0.184143	0.00211198	list(c(-93.724929, -93.73102, -93.731057, -93.731093, -93.731129, -93.731166, -93.731202, -93.731238, -93.731275, -93.731311, -93.725217, -93.719123, -93.713029, -93.706935, -93.700842, -93.694748, -93.688654, -93.68256, -93.682526, -93.682492, -93.682458, -93.682424, -93.68239, -93.682356, -93.682323, -93.682289, -93.68838, -93.694472, -93.700563, -93.706655, -93.712746, -93.718838, -93.724929, …
179	7087	G	NH15-11	Bouma Bank	44866	0	0	0	0	0	2304	0	0	2304	2304	0	0	1	0	NA	1	44866	0.184331	0.00211605	list(c(-92.169823, -92.169865, -92.175968, -92.182072, -92.188175, -92.194279, -92.200382, -92.206485, -92.212589, -92.218692, -92.218653, -92.218614, -92.218575, -92.218536, -92.218497, -92.218458, -92.218418, -92.218379, -92.212273, -92.206167, -92.200061, -92.193955, -92.18785, -92.181744, -92.175638, -92.169532, -92.169574, -92.169615, -92.169657, -92.169698, -92.16974, -92.169782, -92.169823…
180	7121	G	NH16-07	Viosca Knoll	44866	0	0	0	1988.3549560538474	0	2304	0	2	315.6450439461525	2304	0	0	1	0	NA	1	44866	0.185119	0.00213296	list(c(-89.013584, -89.019739, -89.019844, -89.019949, -89.020054, -89.020159, -89.020265, -89.02037, -89.020475, -89.020581, -89.014424, -89.008266, -89.002109, -88.995952, -88.989795, -88.983637, -88.97748, -88.971323, -88.97122, -88.971117, -88.971014, -88.970912, -88.970809, -88.970706, -88.970604, -88.970501, -88.976656, -88.982811, -88.988965, -88.99512, -89.001275, -89.007429, -89.013584, …
181	6578	G	NH16-07	Viosca Knoll	44866	0	0	0	0	0	2304	0	0	2304	2304	0	0	1	0	NA	1	44866	0.185602	0.00214344	list(c(-88.676623, -88.682807, -88.682897, -88.682986, -88.683075, -88.683165, -88.683254, -88.683344, -88.683433, -88.683523, -88.677336, -88.671148, -88.664961, -88.658774, -88.652586, -88.646399, -88.640212, -88.634024, -88.633937, -88.633851, -88.633764, -88.633677, -88.63359, -88.633503, -88.633417, -88.63333, -88.639515, -88.645699, -88.651884, -88.658069, -88.664253, -88.670438, -88.676623…
182	6354	G	NH15-12	Ewing Bank	44866	0	0	0	0	0	2304	0	0	2304	2304	0	0	1	0	NA	1	44866	0.184863	0.00212753	list(c(-91.821421, -91.827559, -91.833696, -91.839833, -91.845971, -91.852108, -91.858246, -91.864383, -91.870521, -91.870463, -91.870405, -91.870347, -91.870289, -91.870231, -91.870173, -91.870114, -91.870056, -91.863916, -91.857776, -91.851636, -91.845496, -91.839356, -91.833217, -91.827077, -91.820937, -91.820997, -91.821058, -91.821119, -91.821179, -91.82124, -91.8213, -91.821361, -91.821421,…
183	6238	G	NH15-10	Bay City	44866	0	0	0	0	0	2304	0	0	2304	2304	0	0	1	0	NA	1	44866	0.184982	0.00213006	list(c(-94.229703, -94.223555, -94.217408, -94.211261, -94.205113, -94.198966, -94.192818, -94.186671, -94.180523, -94.180462, -94.180401, -94.18034, -94.180279, -94.180218, -94.180158, -94.180097, -94.180036, -94.186181, -94.192326, -94.19847, -94.204615, -94.21076, -94.216905, -94.22305, -94.229195, -94.229258, -94.229322, -94.229385, -94.229449, -94.229512, -94.229576, -94.229639, -94.229703, …
184	7031	G	NH14-12	Beeville	44866	0	0	0	2194.8095659627315	0	2304	106.9628318601155	3	2.227602177152974	2197.0371681398847	0	0	1	0	NA	1	44866	0.17632	0.00201562	list(c(-96.508451, -96.508576, -96.508701, -96.508826, -96.508951, -96.509076, -96.509201, -96.509326, -96.509451, -96.51555, -96.52165, -96.52775, -96.533849, -96.539949, -96.546049, -96.552149, -96.558248, -96.558126, -96.558004, -96.557881, -96.557759, -96.557636, -96.557526, -96.545645, -96.539958, -96.538962, -96.53286, -96.526758, -96.520655, -96.514553, -96.508451, 28.0965, 28.091089, 28.0…
185	6474	G	NG14-06	Port Isabel	44866	0	0	0	0	0	2304	0	0	2304	2304	0	0	1	0	NA	1	44866	0.182973	0.00208655	list(c(-96.879287, -96.879386, -96.879486, -96.879586, -96.879686, -96.879785, -96.879885, -96.879984, -96.880084, -96.886103, -96.892122, -96.898142, -96.904161, -96.91018, -96.9162, -96.922219, -96.928238, -96.928141, -96.928044, -96.927946, -96.927849, -96.927751, -96.927654, -96.927556, -96.927459, -96.921437, -96.915416, -96.909394, -96.903373, -96.897351, -96.89133, -96.885308, -96.879287, …
186	6465	G	NH15-12	Ewing Bank	44866	0	0	0	0	0	2304	0	0	2304	2304	0	0	1	0	NA	1	44866	0.184746	0.00212494	list(c(-91.282728, -91.282816, -91.288947, -91.295077, -91.301208, -91.307338, -91.313469, -91.3196, -91.32573, -91.331861, -91.331776, -91.33169, -91.331605, -91.33152, -91.331434, -91.331349, -91.331263, -91.331178, -91.325045, -91.318911, -91.312778, -91.306645, -91.300512, -91.294379, -91.288246, -91.282113, -91.282201, -91.282289, -91.282377, -91.282465, -91.282552, -91.28264, -91.282728, 28…
187	6959	G	NG15-01	East Breaks	44866	0	0	0	0	0	2304	0	0	2304	2304	0	0	1	0	NA	1	44866	0.183379	0.00209528	list(c(-95.656566, -95.662612, -95.662741, -95.662869, -95.662997, -95.663125, -95.663253, -95.663382, -95.66351, -95.663638, -95.65759, -95.651541, -95.645493, -95.639444, -95.633396, -95.627347, -95.621298, -95.61525, -95.615124, -95.614998, -95.614872, -95.614746, -95.61462, -95.614494, -95.614368, -95.614242, -95.620289, -95.626335, -95.632381, -95.638428, -95.644474, -95.65052, -95.656566, 2…
188	6571	G	NG14-03	Corpus Christi	44866	0	0	0	1473.1773360708335	0	2304	0	2	830.8226639291665	2304	0	0	1	0	NA	1	44866	0.183755	0.00210349	list(c(-97.008491, -97.008588, -97.014656, -97.020725, -97.026793, -97.032862, -97.03893, -97.044999, -97.051067, -97.057136, -97.057041, -97.056946, -97.056851, -97.056756, -97.056661, -97.056566, -97.056471, -97.056376, -97.050305, -97.044234, -97.038163, -97.032092, -97.026021, -97.01995, -97.01388, -97.007809, -97.007906, -97.008004, -97.008101, -97.008199, -97.008296, -97.008393, -97.008491,…
189	7077	G	NH15-08	Port Arthur	44866	0	0	0	0	0	2304	0	0	2304	2304	0	0	1	0	NA	1	44866	0.185256	0.00213604	list(c(-92.654919, -92.654937, -92.661098, -92.66726, -92.673422, -92.679584, -92.685746, -92.691907, -92.698069, -92.704231, -92.704215, -92.7042, -92.704185, -92.704169, -92.704154, -92.704138, -92.704123, -92.704107, -92.697943, -92.691779, -92.685614, -92.67945, -92.673286, -92.667121, -92.660957, -92.654793, -92.654811, -92.654829, -92.654847, -92.654865, -92.654883, -92.654901, -92.654919, …
190	6841	G	NH15-12	Ewing Bank	44866	0	0	0	0	0	2304	0	0	2304	2304	0	0	1	0	NA	1	44866	0.184323	0.00211558	list(c(-90.016659, -90.016809, -90.022915, -90.029022, -90.035128, -90.041235, -90.047341, -90.053448, -90.059554, -90.065661, -90.065513, -90.065365, -90.065217, -90.065069, -90.06492, -90.064772, -90.064624, -90.064476, -90.058366, -90.052257, -90.046148, -90.040039, -90.033931, -90.027822, -90.021713, -90.015604, -90.015755, -90.015906, -90.016056, -90.016207, -90.016357, -90.016508, -90.01665…
191	6319	G	NH15-08	Port Arthur	44866	0	0	0	605.3656790180643	0	2304	1698.6343209819358	1	0	605.3656790180643	0	0	1	0	NA	1	44866	0.125579	5.64716234001e-4	list(c(-93.049609, -93.05581, -93.062011, -93.068212, -93.074413, -93.080615, -93.086816, -93.093017, -93.099218, -93.099223, -93.099228, -93.099234, -93.099237, -93.088574, -93.087132, -93.073921, -93.072093, -93.070247, -93.068387, -93.049732, -93.049612, -93.049609, 29.678839, 29.678836, 29.678834, 29.678831, 29.678827, 29.678824, 29.67882, 29.678816, 29.678811, 29.684226, 29.689641, 29.695056…
192	6270	G	NH15-12	Ewing Bank	44866	0	0	0	0	0	2304	0	0	2304	2304	0	0	1	0	NA	1	44866	0.184883	0.00212784	list(c(-91.034289, -91.03439, -91.040529, -91.046669, -91.052809, -91.058948, -91.065088, -91.071228, -91.077367, -91.083507, -91.083408, -91.08331, -91.083211, -91.083112, -91.083013, -91.082915, -91.082816, -91.082717, -91.076574, -91.070432, -91.06429, -91.058148, -91.052006, -91.045863, -91.039721, -91.033579, -91.033681, -91.033782, -91.033883, -91.033985, -91.034086, -91.034187, -91.034289,…
193	6367	G	NG15-02	Garden Banks	44866	0	0	0	0	0	2304	0	0	2304	2304	0	0	1	0	NA	1	44866	0.184003	0.00210896	list(c(-93.194713, -93.188629, -93.182544, -93.176459, -93.170374, -93.16429, -93.158205, -93.15212, -93.146035, -93.146028, -93.146021, -93.146014, -93.146006, -93.145999, -93.145992, -93.145985, -93.145978, -93.15206, -93.158142, -93.164225, -93.170307, -93.17639, -93.182472, -93.188554, -93.194637, -93.194646, -93.194656, -93.194665, -93.194675, -93.194685, -93.194694, -93.194704, -93.194713, …
194	6672	G	NH16-07	Viosca Knoll	44866	0	0	0	0	0	2304	0	0	2304	2304	0	0	1	0	NA	1	44866	0.185492	0.00214101	list(c(-88.971782, -88.97796, -88.978064, -88.978169, -88.978274, -88.978378, -88.978483, -88.978588, -88.978693, -88.978797, -88.972617, -88.966436, -88.960255, -88.954074, -88.947894, -88.941713, -88.935532, -88.929351, -88.929249, -88.929147, -88.929045, -88.928942, -88.92884, -88.928738, -88.928636, -88.928534, -88.934712, -88.940891, -88.947069, -88.953247, -88.959425, -88.965603, -88.971782…
195	6019	G	NG14-06	Port Isabel	44866	0	0	0	529.9624258674888	0	2304	0	2	1774.037574132511	2304	0	0	1	0	NA	1	44866	0.183322	0.00209412	list(c(-97.114362, -97.114452, -97.120493, -97.126534, -97.132574, -97.138615, -97.144656, -97.150697, -97.156738, -97.162779, -97.162691, -97.162603, -97.162516, -97.162428, -97.16234, -97.162252, -97.162164, -97.162076, -97.156033, -97.149989, -97.143946, -97.137903, -97.13186, -97.125817, -97.119774, -97.11373, -97.113821, -97.113911, -97.114001, -97.114091, -97.114182, -97.114272, -97.114362,…
196	6865	G	NG15-01	East Breaks	44866	0	0	0	0	0	2304	0	0	2304	2304	0	0	1	0	NA	1	44866	0.183491	0.00209771	list(c(-95.368137, -95.37419, -95.374304, -95.374419, -95.374534, -95.374649, -95.374763, -95.374878, -95.374993, -95.375108, -95.369053, -95.362998, -95.356944, -95.350889, -95.344834, -95.338779, -95.332724, -95.326669, -95.326556, -95.326444, -95.326331, -95.326219, -95.326107, -95.325994, -95.325882, -95.325769, -95.331822, -95.337875, -95.343927, -95.34998, -95.356032, -95.362085, -95.368137…
197	6253	G	NH16-10	Mississippi Canyon	44866	0	0	0	0	0	2304	0	0	2304	2304	0	0	1	0	NA	1	44866	0.184764	0.00212512	list(c(-89.941389, -89.947523, -89.947675, -89.947826, -89.947978, -89.94813, -89.948282, -89.948434, -89.948586, -89.948738, -89.942601, -89.936464, -89.930328, -89.924191, -89.918054, -89.911918, -89.905781, -89.899644, -89.899495, -89.899345, -89.899196, -89.899047, -89.898897, -89.898748, -89.898599, -89.89845, -89.904584, -89.910718, -89.916853, -89.922987, -89.929121, -89.935255, -89.941389…
198	7106	G	NG15-03	Green Canyon	44866	0	0	0	0	0	2304	0	0	2304	2304	0	0	1	0	NA	1	44866	0.183406	0.00209601	list(c(-91.742274, -91.742334, -91.74838, -91.754425, -91.76047, -91.766516, -91.772561, -91.778606, -91.784652, -91.790697, -91.790639, -91.790581, -91.790523, -91.790465, -91.790407, -91.790349, -91.790291, -91.790233, -91.784186, -91.778138, -91.77209, -91.766042, -91.759995, -91.753947, -91.747899, -91.741852, -91.741912, -91.741973, -91.742033, -91.742093, -91.742153, -91.742214, -91.742274,…
199	6122	G	NH15-11	Bouma Bank	44866	0	0	0	0	0	2304	0	0	2304	2304	0	0	1	0	NA	1	44866	0.185096	0.00213262	list(c(-92.901569, -92.901574, -92.907725, -92.913877, -92.920029, -92.92618, -92.932332, -92.938484, -92.944635, -92.950787, -92.950784, -92.950782, -92.950779, -92.950777, -92.950774, -92.950772, -92.950769, -92.950766, -92.944612, -92.938458, -92.932304, -92.92615, -92.919995, -92.913841, -92.907687, -92.901533, -92.901538, -92.901543, -92.901548, -92.901553, -92.901558, -92.901564, -92.901569…
200	6140	G	NG15-03	Green Canyon	44866	0	0	0	0	0	2304	0	0	2304	2304	0	0	1	0	NA	1	44866	0.183981	0.00210827	list(c(-90.07505, -90.075195, -90.07534, -90.075486, -90.075631, -90.075776, -90.075921, -90.076066, -90.076212, -90.082296, -90.088381, -90.094466, -90.100551, -90.106636, -90.112721, -90.118806, -90.124891, -90.124748, -90.124606, -90.124463, -90.12432, -90.124177, -90.124034, -90.123891, -90.123748, -90.117661, -90.111573, -90.105486, -90.099399, -90.093311, -90.087224, -90.081137, -90.07505, …
201	6982	G	NH14-12	Beeville	44866	0	0	0	1793.9766461056252	0	2304	510.02335389437485	1	0	1793.9766461056252	0	0	1	0	NA	1	44866	0.167265	0.00164631	list(c(-96.508451, -96.508326, -96.508201, -96.508076, -96.507986, -96.495275, -96.47416, -96.472298, -96.470446, -96.466163, -96.464719, -96.458615, -96.458743, -96.458871, -96.458998, -96.459126, -96.459254, -96.459381, -96.459509, -96.459636, -96.465738, -96.47184, -96.477942, -96.484044, -96.490145, -96.496247, -96.502349, -96.508451, 28.0965, 28.101911, 28.107322, 28.112733, 28.116626, 28.12…
202	6077	G	NH15-11	Bouma Bank	44866	0	0	0	0	0	2304	0	0	2304	2304	0	0	1	0	NA	1	44866	0.185137	0.00213343	list(c(-92.65535, -92.655367, -92.661522, -92.667676, -92.67383, -92.679984, -92.686138, -92.692292, -92.698446, -92.7046, -92.704585, -92.704569, -92.704554, -92.704539, -92.704523, -92.704508, -92.704493, -92.704477, -92.698321, -92.692164, -92.686007, -92.679851, -92.673694, -92.667537, -92.661381, -92.655224, -92.655242, -92.65526, -92.655278, -92.655296, -92.655314, -92.655332, -92.65535, 28…
203	6608	G	NH15-08	Port Arthur	44866	0	0	0	0	0	2304	0	0	2304	2304	0	0	1	0	NA	1	44866	0.18562	0.00214388	list(c(-93.637067, -93.643252, -93.643286, -93.64332, -93.643354, -93.643388, -93.643422, -93.643456, -93.643491, -93.643525, -93.637337, -93.63115, -93.624962, -93.618775, -93.612588, -93.6064, -93.600213, -93.594025, -93.593994, -93.593962, -93.593931, -93.593899, -93.593867, -93.593836, -93.593804, -93.593773, -93.599958, -93.606143, -93.612328, -93.618512, -93.624697, -93.630882, -93.637067, …
204	6316	G	NG15-02	Garden Banks	44866	0	0	0	0	0	2304	0	0	2304	2304	0	0	1	0	NA	1	44866	0.18404	0.00210977	list(c(-93.194713, -93.200798, -93.206883, -93.212968, -93.219052, -93.225137, -93.231222, -93.237307, -93.243391, -93.243403, -93.243415, -93.243428, -93.24344, -93.243452, -93.243464, -93.243476, -93.243488, -93.237401, -93.231313, -93.225226, -93.219139, -93.213052, -93.206965, -93.200878, -93.19479, -93.194781, -93.194771, -93.194762, -93.194752, -93.194742, -93.194733, -93.194723, -93.194713…
205	7023	G	NH15-10	Bay City	44866	0	0	0	0	0	2304	0	0	2304	2304	0	0	1	0	NA	1	44866	0.184293	0.00211511	list(c(-94.954446, -94.948342, -94.942237, -94.936132, -94.930027, -94.923922, -94.917818, -94.911713, -94.905608, -94.905512, -94.905416, -94.905321, -94.905225, -94.90513, -94.905034, -94.904938, -94.904843, -94.910945, -94.917048, -94.92315, -94.929253, -94.935355, -94.941458, -94.94756, -94.953662, -94.95376, -94.953858, -94.953956, -94.954054, -94.954152, -94.95425, -94.954348, -94.954446, 2…
206	7130	G	NG14-03	Corpus Christi	44866	0	0	0	0	0	2304	0	0	2304	2304	0	0	1	0	NA	1	44866	0.183302	0.0020936	list(c(-96.58193, -96.582046, -96.588086, -96.594127, -96.600168, -96.606208, -96.612249, -96.61829, -96.62433, -96.630371, -96.630258, -96.630144, -96.630031, -96.629917, -96.629804, -96.62969, -96.629577, -96.629463, -96.62342, -96.617377, -96.611334, -96.605291, -96.599248, -96.593205, -96.587162, -96.581119, -96.581235, -96.581351, -96.581467, -96.581583, -96.581699, -96.581814, -96.58193, 26…
207	6286	G	NG15-01	East Breaks	44866	0	0	0	0	0	2304	0	0	2304	2304	0	0	1	0	NA	1	44866	0.184035	0.00210958	list(c(-94.357294, -94.363379, -94.363446, -94.363514, -94.363581, -94.363648, -94.363716, -94.363783, -94.363851, -94.363918, -94.357831, -94.351743, -94.345656, -94.339568, -94.333481, -94.327393, -94.321305, -94.315218, -94.315153, -94.315087, -94.315022, -94.314957, -94.314892, -94.314827, -94.314762, -94.314697, -94.320783, -94.326868, -94.332953, -94.339038, -94.345123, -94.351209, -94.3572…
208	6519	G	NH16-10	Mississippi Canyon	44866	0	0	0	0	0	2304	0	0	2304	2304	0	0	1	0	NA	1	44866	0.184665	0.00212311	list(c(-89.151507, -89.157633, -89.157743, -89.157853, -89.157963, -89.158073, -89.158184, -89.158294, -89.158404, -89.158515, -89.152386, -89.146257, -89.140129, -89.134, -89.127871, -89.121743, -89.115614, -89.109485, -89.109377, -89.109269, -89.109162, -89.109054, -89.108946, -89.108838, -89.108731, -89.108623, -89.114749, -89.120876, -89.127002, -89.133128, -89.139254, -89.145381, -89.151507,…
209	6983	G	NH16-07	Viosca Knoll	44866	0	0	0	0	0	2304	0	0	2304	2304	0	0	1	0	NA	1	44866	0.18529	0.00213675	list(c(-88.424406, -88.43057, -88.430645, -88.43072, -88.430795, -88.43087, -88.430945, -88.43102, -88.431095, -88.43117, -88.425003, -88.418836, -88.412668, -88.406501, -88.400334, -88.394166, -88.387999, -88.381832, -88.381759, -88.381687, -88.381614, -88.381542, -88.381469, -88.381397, -88.381325, -88.381252, -88.387417, -88.393582, -88.399747, -88.405912, -88.412076, -88.418241, -88.424406, 2…
210	6482	G	NH15-12	Ewing Bank	44866	0	0	0	0	0	2304	0	0	2304	2304	0	0	1	0	NA	1	44866	0.184659	0.00212291	list(c(-90.449193, -90.449323, -90.45545, -90.461576, -90.467703, -90.473829, -90.479956, -90.486083, -90.492209, -90.498336, -90.498208, -90.49808, -90.497952, -90.497824, -90.497696, -90.497568, -90.49744, -90.497312, -90.491183, -90.485054, -90.478924, -90.472795, -90.466666, -90.460537, -90.454408, -90.448279, -90.44841, -90.44854, -90.448671, -90.448802, -90.448932, -90.449062, -90.449193, 2…
211	7005	G	NG15-02	Garden Banks	44866	0	0	0	0	0	2304	0	0	2304	2304	0	0	1	0	NA	1	44866	0.183505	0.00209816	list(c(-93.768538, -93.774589, -93.774627, -93.774664, -93.774701, -93.774738, -93.774776, -93.774813, -93.77485, -93.774888, -93.768834, -93.762781, -93.756728, -93.750674, -93.744621, -93.738567, -93.732514, -93.72646, -93.726425, -93.72639, -93.726355, -93.726321, -93.726286, -93.726251, -93.726216, -93.726181, -93.732232, -93.738283, -93.744334, -93.750385, -93.756436, -93.762487, -93.768538,…
212	7121	G	NH15-12	Ewing Bank	44866	0	0	0	0	0	2304	0	0	2304	2304	0	0	1	0	NA	1	44866	0.184211	0.00211334	list(c(-90.999023, -90.999123, -91.00522, -91.011317, -91.017414, -91.023512, -91.029609, -91.035706, -91.041804, -91.047901, -91.047804, -91.047706, -91.047609, -91.047511, -91.047413, -91.047316, -91.047218, -91.04712, -91.04102, -91.034921, -91.028821, -91.022721, -91.016621, -91.010522, -91.004422, -90.998322, -90.998422, -90.998523, -90.998623, -90.998723, -90.998823, -90.998923, -90.999023,…
213	7136	G	NH16-07	Viosca Knoll	44866	0	0	0	0	0	2304	0	0	2304	2304	0	0	1	0	NA	1	44866	0.185178	0.00213434	list(c(-88.274849, -88.281006, -88.281073, -88.28114, -88.281207, -88.281273, -88.28134, -88.281407, -88.281474, -88.281541, -88.275381, -88.269221, -88.263061, -88.256901, -88.250741, -88.24458, -88.23842, -88.23226, -88.232196, -88.232132, -88.232067, -88.232003, -88.231939, -88.231875, -88.231811, -88.231747, -88.237904, -88.244062, -88.250219, -88.256377, -88.262534, -88.268692, -88.274849, 2…
214	6553	G	NH16-10	Mississippi Canyon	44866	0	0	0	0	0	2304	0	0	2304	2304	0	0	1	0	NA	1	44866	0.184525	0.00211997	list(c(-89.934173, -89.940292, -89.940442, -89.940592, -89.940741, -89.940891, -89.941041, -89.941191, -89.941341, -89.941491, -89.935369, -89.929248, -89.923126, -89.917004, -89.910883, -89.904761, -89.898639, -89.892518, -89.89237, -89.892223, -89.892075, -89.891928, -89.891781, -89.891633, -89.891486, -89.891339, -89.897458, -89.903577, -89.909697, -89.915816, -89.921935, -89.928054, -89.93417…
215	7138	G	NG14-03	Corpus Christi	44866	0	0	0	0	0	2304	0	0	2304	2304	0	0	1	0	NA	1	44866	0.183252	0.00209246	list(c(-96.195387, -96.195521, -96.20156, -96.207598, -96.213636, -96.219675, -96.225713, -96.231752, -96.23779, -96.243829, -96.243697, -96.243565, -96.243433, -96.243301, -96.243169, -96.243037, -96.242905, -96.242773, -96.236732, -96.230691, -96.22465, -96.21861, -96.212569, -96.206528, -96.200488, -96.194447, -96.194581, -96.194716, -96.19485, -96.194984, -96.195119, -96.195253, -96.195387, 2…
216	6920	G	NG15-01	East Breaks	44866	0	0	0	0	0	2304	0	0	2304	2304	0	0	1	0	NA	1	44866	0.183482	0.00209753	list(c(-95.125194, -95.131246, -95.131348, -95.131451, -95.131554, -95.131657, -95.13176, -95.131863, -95.131966, -95.132069, -95.126015, -95.119961, -95.113908, -95.107854, -95.1018, -95.095746, -95.089693, -95.083639, -95.083538, -95.083438, -95.083337, -95.083236, -95.083136, -95.083035, -95.082935, -95.082834, -95.088886, -95.094937, -95.100989, -95.10704, -95.113092, -95.119143, -95.125194, …
217	6404	G	NH15-12	Ewing Bank	44866	0	0	0	0	0	2304	0	0	2304	2304	0	0	1	0	NA	1	44866	0.184825	0.00212666	list(c(-91.821421, -91.821482, -91.821542, -91.821603, -91.821663, -91.821724, -91.821784, -91.821844, -91.821905, -91.82804, -91.834175, -91.840309, -91.846444, -91.852579, -91.858714, -91.864849, -91.870984, -91.870926, -91.870868, -91.87081, -91.870753, -91.870695, -91.870637, -91.870579, -91.870521, -91.864383, -91.858246, -91.852108, -91.845971, -91.839833, -91.833696, -91.827559, -91.821421…
218	6839	G	NH15-08	Port Arthur	44866	0	0	0	0	0	2304	0	0	2304	2304	0	0	1	0	NA	1	44866	0.185443	0.00214007	list(c(-92.06143, -92.061479, -92.067653, -92.073827, -92.08, -92.086174, -92.092348, -92.098522, -92.104696, -92.11087, -92.110823, -92.110776, -92.110729, -92.110682, -92.110636, -92.110589, -92.110542, -92.110495, -92.104318, -92.098142, -92.091965, -92.085789, -92.079613, -92.073436, -92.06726, -92.061083, -92.061133, -92.061182, -92.061232, -92.061281, -92.061331, -92.06138, -92.06143, 29.24…
219	7116	G	NG15-01	East Breaks	44866	0	0	0	0	0	2304	0	0	2304	2304	0	0	1	0	NA	1	44866	0.183312	0.00209387	list(c(-95.321301, -95.321412, -95.321524, -95.321635, -95.321746, -95.321857, -95.321968, -95.32208, -95.322191, -95.316148, -95.310104, -95.304061, -95.298017, -95.291974, -95.28593, -95.279887, -95.273843, -95.273734, -95.273625, -95.273516, -95.273407, -95.273298, -95.27319, -95.273081, -95.272972, -95.279013, -95.285054, -95.291096, -95.297137, -95.303178, -95.309219, -95.31526, -95.321301, …
220	6588	G	NH15-08	Port Arthur	44866	0	0	0	1168.6578751175716	0	2304	0	2	1135.3421248824286	2304	0	0	1	0	NA	1	44866	0.185652	0.00214456	list(c(-92.10894, -92.108987, -92.115174, -92.121361, -92.127548, -92.133735, -92.139922, -92.146109, -92.152296, -92.158483, -92.158439, -92.158394, -92.158349, -92.158304, -92.15826, -92.158215, -92.15817, -92.158125, -92.151936, -92.145746, -92.139556, -92.133367, -92.127177, -92.120987, -92.114798, -92.108608, -92.108656, -92.108703, -92.10875, -92.108798, -92.108845, -92.108893, -92.10894, 2…
221	6023	G	NH15-12	Ewing Bank	44866	0	0	0	1492.4701801759068	0	2304	0	2	811.5298198240932	2304	0	0	1	0	NA	1	44866	0.185068	0.00213184	list(c(-90.882563, -90.882673, -90.888824, -90.894976, -90.901128, -90.907279, -90.913431, -90.919583, -90.925734, -90.931886, -90.931779, -90.931671, -90.931564, -90.931456, -90.931348, -90.931241, -90.931133, -90.931026, -90.924871, -90.918717, -90.912563, -90.906408, -90.900254, -90.8941, -90.887946, -90.881792, -90.881902, -90.882012, -90.882122, -90.882232, -90.882343, -90.882453, -90.882563…
222	7143	G	NG15-03	Green Canyon	44866	0	0	0	0	0	83.0782	0	0	83.07820748856182	83.07820748856182	0	0	0	0	NA	1	44866	0.09008	7.54218855e-5	list(c(-90, -90, -90.002316, -90.002172, -90.002029, -90.001885, -90.001742, -90.001598, -90.001455, -90.001311, -90.001168, -90, -90, -90, -90, -90, -90, -90, -90, -90, -90, -90, -90, -90, -90, -90, -90, -90, -90, -90, -90, -90, -90, -90, -90, -90, -90, -90, -90, -90, -90, -90, -90, -90, -90, -90, -90, -90, -90, -90, -90, -90, -90, -90, -90, -90, -90, -90, -90, -90, -90, -90, -90, -90, -90, -90,…
223	6535	G	NG14-06	Port Isabel	44866	0	0	0	0	0	2304	0	0	2304	2304	0	0	1	0	NA	1	44866	0.182877	0.00208436	list(c(-96.351508, -96.357522, -96.363537, -96.369551, -96.375565, -96.381579, -96.387594, -96.393608, -96.399623, -96.399501, -96.399379, -96.399257, -96.399135, -96.399013, -96.398891, -96.398769, -96.398647, -96.39263, -96.386613, -96.380597, -96.37458, -96.368564, -96.362547, -96.356531, -96.350514, -96.350639, -96.350763, -96.350887, -96.351012, -96.351136, -96.35126, -96.351384, -96.351508,…
224	6121	G	NG14-06	Port Isabel	44866	0	0	0	0	0	2304	0	0	2304	2304	0	0	1	0	NA	1	44866	0.18324	0.00209231	list(c(-97.01922, -97.019314, -97.02535, -97.031386, -97.037422, -97.043458, -97.049494, -97.05553, -97.061565, -97.067601, -97.067509, -97.067417, -97.067325, -97.067233, -97.067141, -97.067049, -97.066957, -97.066865, -97.060827, -97.054788, -97.04875, -97.042712, -97.036674, -97.030636, -97.024598, -97.018559, -97.018654, -97.018748, -97.018843, -97.018937, -97.019032, -97.019126, -97.01922, 2…
225	7088	G	NH15-08	Port Arthur	44866	0	0	0	0	0	2304	0	0	2304	2304	0	0	1	0	NA	1	44866	0.185241	0.0021357	list(c(-92.112361, -92.112407, -92.112454, -92.1125, -92.112547, -92.112593, -92.112639, -92.112685, -92.112732, -92.118893, -92.125054, -92.131215, -92.137376, -92.143537, -92.149698, -92.155859, -92.16202, -92.161976, -92.161933, -92.161889, -92.161845, -92.161801, -92.161757, -92.161714, -92.16167, -92.155506, -92.149343, -92.143179, -92.137015, -92.130852, -92.124688, -92.118525, -92.112361, …
226	6828	G	NG15-02	Garden Banks	44866	0	0	0	0	0	2304	0	0	2304	2304	0	0	1	0	NA	1	44866	0.183662	0.00210159	list(c(-92.612077, -92.612096, -92.618157, -92.624218, -92.630279, -92.63634, -92.642401, -92.648461, -92.654522, -92.660583, -92.660567, -92.66055, -92.660534, -92.660517, -92.660501, -92.660485, -92.660468, -92.660452, -92.654388, -92.648325, -92.642262, -92.636199, -92.630135, -92.624072, -92.618009, -92.611946, -92.611964, -92.611983, -92.612002, -92.612021, -92.61204, -92.612058, -92.612077,…
227	7084	G	NH15-12	Ewing Bank	44866	0	0	0	0	0	2304	0	0	2304	2304	0	0	1	0	NA	1	44866	0.184178	0.00211251	list(c(-90.363995, -90.364126, -90.370223, -90.376319, -90.382416, -90.388512, -90.394608, -90.400705, -90.406801, -90.412898, -90.412769, -90.412639, -90.41251, -90.41238, -90.412251, -90.412121, -90.411992, -90.411862, -90.405763, -90.399664, -90.393565, -90.387466, -90.381367, -90.375268, -90.36917, -90.363071, -90.363203, -90.363335, -90.363467, -90.363599, -90.363731, -90.363863, -90.363995,…
228	6569	G	NH15-10	Bay City	44866	0	0	0	0	0	2304	0	0	2304	2304	0	0	1	0	NA	1	44866	0.184626	0.00212226	list(c(-95.150629, -95.156753, -95.156863, -95.156973, -95.157083, -95.157193, -95.157303, -95.157413, -95.157523, -95.157633, -95.151507, -95.145381, -95.139254, -95.133128, -95.127002, -95.120876, -95.114749, -95.108623, -95.108516, -95.108408, -95.108301, -95.108193, -95.108086, -95.107978, -95.107871, -95.107763, -95.113887, -95.120011, -95.126135, -95.132258, -95.138382, -95.144506, -95.1506…
229	6542	G	NH16-10	Mississippi Canyon	44866	0	0	0	0	0	2304	0	0	2304	2304	0	0	1	0	NA	1	44866	0.184753	0.00212513	list(c(-88.023881, -88.030011, -88.030063, -88.030116, -88.030169, -88.030221, -88.030274, -88.030327, -88.030379, -88.030432, -88.024299, -88.018167, -88.012034, -88.005901, -87.999768, -87.993636, -87.987503, -87.98137, -87.98132, -87.98127, -87.981219, -87.981169, -87.981119, -87.981069, -87.981019, -87.980969, -87.987099, -87.993229, -87.99936, -88.00549, -88.01162, -88.01775, -88.023881, 28.…
230	7110	G	NH15-12	Ewing Bank	44866	0	0	0	0	0	2304	0	0	2304	2304	0	0	1	0	NA	1	44866	0.184258	0.00211439	list(c(-91.535701, -91.535774, -91.541873, -91.547973, -91.554072, -91.560172, -91.566271, -91.57237, -91.57847, -91.584569, -91.584499, -91.584428, -91.584357, -91.584286, -91.584215, -91.584145, -91.584074, -91.584003, -91.577901, -91.571799, -91.565697, -91.559595, -91.553494, -91.547392, -91.54129, -91.535188, -91.535262, -91.535335, -91.535408, -91.535481, -91.535555, -91.535628, -91.535701,…
231	6951	G	NH15-11	Bouma Bank	44866	0	0	0	0	0	2304	0	0	2304	2304	0	0	1	0	NA	1	44866	0.184403	0.00211757	list(c(-93.97129, -93.977398, -93.977447, -93.977496, -93.977545, -93.977594, -93.977643, -93.977692, -93.977742, -93.977791, -93.97168, -93.96557, -93.959459, -93.953349, -93.947238, -93.941128, -93.935017, -93.928907, -93.92886, -93.928813, -93.928766, -93.92872, -93.928673, -93.928626, -93.92858, -93.928533, -93.934641, -93.940749, -93.946857, -93.952965, -93.959073, -93.965181, -93.97129, 28.…
232	6438	G	NH16-07	Viosca Knoll	44866	0	0	0	0	0	2304	0	0	2304	2304	0	0	1	0	NA	1	44866	0.185762	0.00214693	list(c(-88.183296, -88.18949, -88.189553, -88.189617, -88.18968, -88.189744, -88.189807, -88.189871, -88.189935, -88.189998, -88.183802, -88.177605, -88.171408, -88.165211, -88.159014, -88.152817, -88.14662, -88.140423, -88.140362, -88.140301, -88.140241, -88.14018, -88.140119, -88.140058, -88.139997, -88.139936, -88.14613, -88.152325, -88.158519, -88.164713, -88.170907, -88.177101, -88.183296, 2…
233	7053	G	NH15-11	Bouma Bank	44866	0	0	0	0	0	2304	0	0	2304	2304	0	0	1	0	NA	1	44866	0.184331	0.00211599	list(c(-93.872859, -93.878962, -93.879006, -93.87905, -93.879094, -93.879138, -93.879182, -93.879226, -93.87927, -93.879315, -93.873209, -93.867103, -93.860997, -93.854891, -93.848786, -93.84268, -93.836574, -93.830468, -93.830426, -93.830385, -93.830343, -93.830302, -93.83026, -93.830218, -93.830177, -93.830135, -93.836239, -93.842342, -93.848445, -93.854549, -93.860652, -93.866755, -93.872859, …
234	6610	G	NH15-10	Bay City	44866	0	0	0	0	0	2304	0	0	2304	2304	0	0	1	0	NA	1	44866	0.184534	0.00212023	list(c(-95.59651, -95.596641, -95.596774, -95.596906, -95.597038, -95.59717, -95.597302, -95.597434, -95.597566, -95.591445, -95.585324, -95.579203, -95.573081, -95.56696, -95.560839, -95.554717, -95.548596, -95.548466, -95.548336, -95.548207, -95.548077, -95.547947, -95.547818, -95.547688, -95.547559, -95.553678, -95.559797, -95.565916, -95.572034, -95.578153, -95.584272, -95.590391, -95.59651, …
235	7084	G	NH15-10	Bay City	44866	0	0	0	0	0	2304	0	0	2304	2304	0	0	1	0	NA	1	44866	0.1843	0.00211531	list(c(-94.409895, -94.415997, -94.416068, -94.416139, -94.41621, -94.416281, -94.416352, -94.416423, -94.416494, -94.416565, -94.41046, -94.404356, -94.398252, -94.392147, -94.386043, -94.379938, -94.373834, -94.367729, -94.367661, -94.367592, -94.367524, -94.367455, -94.367387, -94.367318, -94.36725, -94.367181, -94.373283, -94.379385, -94.385487, -94.391589, -94.397691, -94.403793, -94.409895,…
236	6583	G	NG15-02	Garden Banks	44866	0	0	0	0	0	2304	0	0	2304	2304	0	0	1	0	NA	1	44866	0.183845	0.00210551	list(c(-92.368407, -92.368437, -92.37451, -92.380582, -92.386655, -92.392727, -92.3988, -92.404872, -92.410945, -92.417017, -92.416989, -92.41696, -92.416932, -92.416903, -92.416874, -92.416846, -92.416817, -92.416789, -92.410714, -92.404639, -92.398564, -92.392489, -92.386415, -92.38034, -92.374265, -92.36819, -92.368221, -92.368252, -92.368283, -92.368314, -92.368345, -92.368376, -92.368407, 27…
237	6977	G	NG14-03	Corpus Christi	44866	0	0	0	0	0	2304	0	0	2304	2304	0	0	1	0	NA	1	44866	0.183427	0.00209637	list(c(-96.724299, -96.724409, -96.730457, -96.736505, -96.742554, -96.748602, -96.75465, -96.760699, -96.766747, -96.772796, -96.772689, -96.772581, -96.772474, -96.772367, -96.77226, -96.772152, -96.772045, -96.771937, -96.765887, -96.759836, -96.753785, -96.747734, -96.741684, -96.735633, -96.729582, -96.723532, -96.723642, -96.723751, -96.723861, -96.723971, -96.72408, -96.72419, -96.724299, …
238	6853	G	NH15-08	Port Arthur	44866	0	0	0	0	0	2304	0	0	2304	2304	0	0	1	0	NA	1	44866	0.185404	0.00213923	list(c(-93.839739, -93.839694, -93.83965, -93.839606, -93.839562, -93.839518, -93.839474, -93.839429, -93.839385, -93.845557, -93.851728, -93.8579, -93.864071, -93.870242, -93.876414, -93.882585, -93.888756, -93.888803, -93.88885, -93.888896, -93.888943, -93.88899, -93.889037, -93.889083, -93.88913, -93.882956, -93.876782, -93.870608, -93.864435, -93.858261, -93.852087, -93.845913, -93.839739, 29…
239	6952	G	NG15-01	East Breaks	44866	0	0	0	0	0	2222.36	0	0	2222.356213805739	2222.356213805739	0	0	0	0	NA	1	44866	0.179914	0.00201999	list(c(-95.995092, -96, -96, -96, -96, -96, -96, -96, -96, -96, -96, -96, -96, -96, -96, -96, -96, -96, -96, -96, -96, -96, -96, -96, -96, -96, -96, -96, -96, -96, -96, -96, -96, -96, -96, -96, -96, -96, -96, -96, -96, -96, -96, -96, -96, -96, -96, -96, -96, -96, -96, -96, -96, -96, -96, -96, -96, -96, -96, -96, -96, -96, -96, -96, -96, -96, -96, -96, -96, -96, -96, -96, -96, -96, -96, -96, -96, …
240	6018	G	NG15-03	Green Canyon	44866	0	0	0	0	0	2304	0	0	2304	2304	0	0	1	0	NA	1	44866	0.184186	0.00211283	list(c(-91.146111, -91.146203, -91.152299, -91.158394, -91.16449, -91.170585, -91.176681, -91.182776, -91.188872, -91.194967, -91.194877, -91.194787, -91.194697, -91.194607, -91.194517, -91.194427, -91.194337, -91.194247, -91.188149, -91.182051, -91.175953, -91.169855, -91.163757, -91.157659, -91.151561, -91.145463, -91.145556, -91.145648, -91.145741, -91.145833, -91.145926, -91.146018, -91.14611…
241	6659	G	NH15-10	Bay City	44866	0	0	0	0	0	2304	0	0	2304	2304	0	0	1	0	NA	1	44866	0.184486	0.00211921	list(c(-95.59651, -95.596378, -95.596246, -95.596114, -95.595982, -95.59585, -95.595718, -95.595587, -95.595455, -95.601571, -95.607687, -95.613803, -95.619919, -95.626036, -95.632152, -95.638268, -95.644383, -95.644518, -95.644652, -95.644786, -95.64492, -95.645055, -95.645189, -95.645323, -95.645458, -95.639339, -95.633221, -95.627102, -95.620984, -95.614865, -95.608747, -95.602628, -95.59651, …
242	6465	G	NH16-10	Mississippi Canyon	44866	0	0	0	0	0	2304	0	0	2304	2304	0	0	1	0	NA	1	44866	0.184681	0.00212344	list(c(-89.348485, -89.354613, -89.354733, -89.354853, -89.354974, -89.355094, -89.355215, -89.355335, -89.355456, -89.355577, -89.349446, -89.343316, -89.337186, -89.331056, -89.324926, -89.318796, -89.312665, -89.306535, -89.306417, -89.306299, -89.306181, -89.306063, -89.305945, -89.305827, -89.305709, -89.305591, -89.311719, -89.317847, -89.323974, -89.330102, -89.33623, -89.342357, -89.34848…
243	7036	G	NH16-07	Viosca Knoll	44866	0	0	0	0	0	2304	0	0	2304	2304	0	0	1	0	NA	1	44866	0.185261	0.00213609	list(c(-88.275914, -88.282076, -88.282143, -88.28221, -88.282277, -88.282344, -88.282411, -88.282478, -88.282546, -88.282613, -88.276448, -88.270282, -88.264117, -88.257952, -88.251787, -88.245622, -88.239456, -88.233291, -88.233227, -88.233162, -88.233097, -88.233033, -88.232968, -88.232904, -88.23284, -88.232775, -88.238938, -88.2451, -88.251263, -88.257426, -88.263588, -88.269751, -88.275914, …
244	6507	G	NH15-11	Bouma Bank	44866	0	0	0	0	0	2304	0	0	2304	2304	0	0	1	0	NA	1	44866	0.184767	0.00212547	list(c(-93.680568, -93.686699, -93.686734, -93.686769, -93.686804, -93.68684, -93.686875, -93.68691, -93.686945, -93.68698, -93.680847, -93.674713, -93.66858, -93.662446, -93.656313, -93.65018, -93.644046, -93.637913, -93.63788, -93.637847, -93.637815, -93.637782, -93.63775, -93.637717, -93.637684, -93.637652, -93.643783, -93.649914, -93.656045, -93.662176, -93.668307, -93.674437, -93.680568, 28.…
245	6875	G	NH15-12	Ewing Bank	44866	0	0	0	0	0	2304	0	0	2304	2304	0	0	1	0	NA	1	44866	0.184384	0.00211705	list(c(-90.799506, -90.799617, -90.805725, -90.811834, -90.817942, -90.824051, -90.830159, -90.836268, -90.842377, -90.848486, -90.848377, -90.848269, -90.84816, -90.848052, -90.847943, -90.847835, -90.847726, -90.847617, -90.841506, -90.835395, -90.829284, -90.823173, -90.817062, -90.810951, -90.80484, -90.798729, -90.79884, -90.798951, -90.799062, -90.799173, -90.799284, -90.799395, -90.799506,…
246	6635	G	NH16-10	Mississippi Canyon	44866	0	0	0	0	0	2304	0	0	2304	2304	0	0	1	0	NA	1	44866	0.184655	0.00212297	list(c(-88.366033, -88.372158, -88.372227, -88.372297, -88.372367, -88.372437, -88.372507, -88.372577, -88.372647, -88.372717, -88.36659, -88.360463, -88.354336, -88.348209, -88.342083, -88.335956, -88.329829, -88.323702, -88.323634, -88.323567, -88.3235, -88.323432, -88.323365, -88.323297, -88.32323, -88.323163, -88.329287, -88.335412, -88.341536, -88.34766, -88.353785, -88.359909, -88.366033, 2…
247	6654	G	NH15-12	Ewing Bank	44866	0	0	0	0	0	2304	0	0	2304	2304	0	0	1	0	NA	1	44866	0.184627	0.00212239	list(c(-91.824247, -91.824306, -91.830429, -91.836551, -91.842674, -91.848796, -91.854918, -91.861041, -91.867163, -91.873286, -91.873229, -91.873171, -91.873114, -91.873057, -91.872999, -91.872942, -91.872885, -91.872827, -91.866703, -91.860578, -91.854453, -91.848328, -91.842203, -91.836078, -91.829953, -91.823828, -91.823888, -91.823948, -91.824008, -91.824068, -91.824127, -91.824187, -91.8242…
248	6054	G	NH16-10	Mississippi Canyon	44866	0	0	0	0	0	2304	0	0	2304	2304	0	0	1	0	NA	1	44866	0.18493	0.00212873	list(c(-89.897098, -89.903243, -89.903393, -89.903544, -89.903694, -89.903845, -89.903996, -89.904146, -89.904297, -89.904448, -89.898301, -89.892154, -89.886007, -89.87986, -89.873712, -89.867565, -89.861418, -89.855271, -89.855123, -89.854974, -89.854826, -89.854678, -89.85453, -89.854382, -89.854234, -89.854086, -89.860231, -89.866376, -89.87252, -89.878665, -89.884809, -89.890954, -89.897098,…
249	7008	G	NG15-03	Green Canyon	44866	0	0	0	0	0	2304	0	0	2304	2304	0	0	1	0	NA	1	44866	0.183474	0.00209747	list(c(-91.644507, -91.644572, -91.650621, -91.656671, -91.662721, -91.66877, -91.67482, -91.68087, -91.68692, -91.69297, -91.692907, -91.692844, -91.692781, -91.692718, -91.692655, -91.692592, -91.692529, -91.692466, -91.686414, -91.680362, -91.67431, -91.668258, -91.662206, -91.656154, -91.650102, -91.64405, -91.644115, -91.64418, -91.644246, -91.644311, -91.644376, -91.644441, -91.644507, 27.0…
250	6659	G	NG15-02	Garden Banks	44866	0	0	0	0	0	2304	0	0	2304	2304	0	0	1	0	NA	1	44866	0.183771	0.00210392	list(c(-93.57646, -93.582528, -93.582556, -93.582585, -93.582613, -93.582641, -93.58267, -93.582698, -93.582727, -93.582755, -93.576685, -93.570615, -93.564545, -93.558475, -93.552405, -93.546334, -93.540264, -93.534194, -93.534168, -93.534142, -93.534116, -93.53409, -93.534064, -93.534038, -93.534012, -93.533986, -93.540054, -93.546121, -93.552189, -93.558257, -93.564325, -93.570392, -93.57646, …
251	6283	G	NH15-12	Ewing Bank	44866	0	0	0	0	0	2304	0	0	2304	2304	0	0	1	0	NA	1	44866	0.18481	0.00212618	list(c(-90.39497, -90.395104, -90.395238, -90.395373, -90.395507, -90.395641, -90.395775, -90.395909, -90.396043, -90.402179, -90.408316, -90.414452, -90.420588, -90.426724, -90.432861, -90.438997, -90.445134, -90.445002, -90.444871, -90.444739, -90.444607, -90.444476, -90.444344, -90.444212, -90.444081, -90.437942, -90.431803, -90.425664, -90.419525, -90.413386, -90.407247, -90.401108, -90.39497…
252	7039	G	NH15-08	Port Arthur	44866	0	0	0	0	0	2304	0	0	2304	2304	0	0	1	0	NA	1	44866	0.185279	0.00213652	list(c(-92.112361, -92.112315, -92.112268, -92.112222, -92.112175, -92.112129, -92.112082, -92.112036, -92.111989, -92.105823, -92.099657, -92.093491, -92.087325, -92.081159, -92.074993, -92.068827, -92.062661, -92.06271, -92.062759, -92.062808, -92.062857, -92.062906, -92.062955, -92.063004, -92.063053, -92.069216, -92.07538, -92.081543, -92.087707, -92.09387, -92.100034, -92.106197, -92.112361,…
253	7077	G	NG14-03	Corpus Christi	44866	0	0	0	0	0	2304	0	0	2304	2304	0	0	1	0	NA	1	44866	0.183355	0.00209478	list(c(-96.726048, -96.726157, -96.732201, -96.738244, -96.744288, -96.750332, -96.756375, -96.762419, -96.768463, -96.774507, -96.7744, -96.774293, -96.774187, -96.77408, -96.773973, -96.773866, -96.773759, -96.773652, -96.767606, -96.76156, -96.755514, -96.749468, -96.743422, -96.737376, -96.73133, -96.725284, -96.725393, -96.725502, -96.725612, -96.725721, -96.72583, -96.725939, -96.726048, 27…
254	6727	G	NH15-08	Port Arthur	44866	0	0	0	0	0	2304	0	0	2304	2304	0	0	1	0	NA	1	44866	0.185542	0.00214226	list(c(-92.653902, -92.653921, -92.6601, -92.66628, -92.67246, -92.67864, -92.68482, -92.691, -92.69718, -92.70336, -92.703344, -92.703329, -92.703313, -92.703297, -92.703281, -92.703266, -92.70325, -92.703234, -92.697052, -92.690869, -92.684687, -92.678504, -92.672322, -92.666139, -92.659957, -92.653774, -92.653792, -92.653811, -92.653829, -92.653847, -92.653866, -92.653884, -92.653902, 29.33724…
255	6889	G	NH15-11	Bouma Bank	44866	0	0	0	0	0	2304	0	0	2304	2304	0	0	1	0	NA	1	44866	0.184481	0.0021193	list(c(-92.070672, -92.070719, -92.076832, -92.082945, -92.089058, -92.095171, -92.101284, -92.107397, -92.11351, -92.119624, -92.119579, -92.119535, -92.11949, -92.119446, -92.119401, -92.119357, -92.119312, -92.119268, -92.113152, -92.107037, -92.100921, -92.094806, -92.08869, -92.082575, -92.076459, -92.070344, -92.070391, -92.070437, -92.070484, -92.070531, -92.070578, -92.070625, -92.070672,…
256	6718	G	NH15-12	Ewing Bank	44866	0	0	0	0	0	2304	0	0	2304	2304	0	0	1	0	NA	1	44866	0.184538	0.00212038	list(c(-91.139388, -91.139482, -91.1456, -91.151717, -91.157835, -91.163953, -91.17007, -91.176188, -91.182305, -91.188423, -91.188331, -91.188239, -91.188148, -91.188056, -91.187964, -91.187872, -91.18778, -91.187688, -91.181568, -91.175448, -91.169327, -91.163207, -91.157087, -91.150967, -91.144847, -91.138727, -91.138822, -91.138916, -91.139011, -91.139105, -91.139199, -91.139294, -91.139388, …
257	6985	G	NG15-02	Garden Banks	44866	0	0	0	0	0	2304	0	0	2304	2304	0	0	1	0	NA	1	44866	0.183543	0.00209899	list(c(-92.273505, -92.27354, -92.279593, -92.285646, -92.2917, -92.297753, -92.303807, -92.30986, -92.315914, -92.321967, -92.321935, -92.321902, -92.321869, -92.321837, -92.321804, -92.321771, -92.321739, -92.321706, -92.31565, -92.309594, -92.303538, -92.297483, -92.291427, -92.285371, -92.279315, -92.273259, -92.273294, -92.273329, -92.273365, -92.2734, -92.273435, -92.27347, -92.273505, 27.1…
258	6674	G	NG15-01	East Breaks	44866	0	0	0	0	0	2304	0	0	2304	2304	0	0	1	0	NA	1	44866	0.183685	0.00210197	list(c(-94.935285, -94.941349, -94.941443, -94.941538, -94.941632, -94.941727, -94.941821, -94.941916, -94.942011, -94.942105, -94.936039, -94.929973, -94.923907, -94.91784, -94.911774, -94.905707, -94.899641, -94.893575, -94.893482, -94.89339, -94.893298, -94.893205, -94.893113, -94.893021, -94.892929, -94.892837, -94.898901, -94.904965, -94.911029, -94.917093, -94.923157, -94.929221, -94.935285…
259	6572	G	NH16-07	Viosca Knoll	44866	0	0	0	80.46656062160521	0	2304	0	2	2223.533439378395	2304.0000000000005	0	0	1	0	NA	1	44866	0.185576	0.00214281	list(c(-88.973454, -88.979637, -88.979742, -88.979847, -88.979952, -88.980058, -88.980163, -88.980268, -88.980373, -88.980479, -88.974293, -88.968107, -88.961921, -88.955735, -88.949549, -88.943363, -88.937176, -88.93099, -88.930888, -88.930785, -88.930682, -88.93058, -88.930477, -88.930375, -88.930272, -88.93017, -88.936353, -88.942537, -88.94872, -88.954904, -88.961087, -88.96727, -88.973454, 2…
260	6158	G	NH15-12	Ewing Bank	44866	0	0	0	0	0	2304	0	0	2304	2304	0	0	1	0	NA	1	44866	0.185011	0.0021307	list(c(-91.671942, -91.671873, -91.671805, -91.671736, -91.671667, -91.671598, -91.67153, -91.671461, -91.671392, -91.665242, -91.659093, -91.652943, -91.646794, -91.640644, -91.634495, -91.628345, -91.622196, -91.622267, -91.622338, -91.62241, -91.622481, -91.622552, -91.622624, -91.622695, -91.622766, -91.628913, -91.63506, -91.641207, -91.647354, -91.653501, -91.659648, -91.665795, -91.671942,…
261	6691	G	NG14-06	Port Isabel	44866	0	0	0	0	0	2304	0	0	2304	2304	0	0	1	0	NA	1	44866	0.182727	0.00208114	list(c(-96.066025, -96.066162, -96.072168, -96.078173, -96.084179, -96.090185, -96.096191, -96.102197, -96.108203, -96.114208, -96.114074, -96.11394, -96.113805, -96.113671, -96.113536, -96.113401, -96.113267, -96.113132, -96.107124, -96.101116, -96.095108, -96.0891, -96.083092, -96.077084, -96.071076, -96.065068, -96.065205, -96.065342, -96.065478, -96.065615, -96.065752, -96.065889, -96.066025,…
262	6784	G	NG15-03	Green Canyon	44866	0	0	0	0	0	2304	0	0	2304	2304	0	0	1	0	NA	1	44866	0.183535	0.00209863	list(c(-90.381588, -90.381715, -90.387771, -90.393827, -90.399883, -90.405938, -90.411994, -90.41805, -90.424106, -90.430162, -90.430038, -90.429913, -90.429788, -90.429664, -90.429539, -90.429414, -90.429289, -90.429165, -90.423106, -90.417048, -90.41099, -90.404932, -90.398873, -90.392815, -90.386757, -90.380699, -90.380826, -90.380953, -90.38108, -90.381207, -90.381334, -90.381461, -90.381588,…
263	6909	G	NH16-10	Mississippi Canyon	44866	0	0	0	0	0	2304	0	0	2304	2304	0	0	1	0	NA	1	44866	0.184292	0.00211501	list(c(-89.632943, -89.639047, -89.63918, -89.639312, -89.639445, -89.639578, -89.639711, -89.639844, -89.639977, -89.64011, -89.634004, -89.627897, -89.621791, -89.615685, -89.609579, -89.603473, -89.597366, -89.59126, -89.59113, -89.590999, -89.590869, -89.590738, -89.590608, -89.590478, -89.590347, -89.590217, -89.596321, -89.602425, -89.608529, -89.614632, -89.620736, -89.62684, -89.632943, 2…
264	6179	G	NH15-12	Ewing Bank	44866	0	0	0	0	0	2304	0	0	2304	2304	0	0	1	0	NA	1	44866	0.184916	0.00212848	list(c(-90.590432, -90.596575, -90.602717, -90.608859, -90.615002, -90.621144, -90.627287, -90.63343, -90.639572, -90.63945, -90.639328, -90.639206, -90.639084, -90.638962, -90.63884, -90.638718, -90.638596, -90.63245, -90.626305, -90.62016, -90.614015, -90.60787, -90.601725, -90.59558, -90.589435, -90.58956, -90.589685, -90.589809, -90.589934, -90.590059, -90.590183, -90.590308, -90.590432, 28.7…
265	6216	G	NG15-01	East Breaks	44866	0	0	0	0	0	2304	0	0	2304	2304	0	0	1	0	NA	1	44866	0.183982	0.00210837	list(c(-95.33154, -95.337623, -95.337739, -95.337855, -95.33797, -95.338086, -95.338202, -95.338318, -95.338433, -95.338549, -95.332463, -95.326378, -95.320292, -95.314206, -95.30812, -95.302034, -95.295948, -95.289862, -95.289748, -95.289635, -95.289521, -95.289408, -95.289295, -95.289181, -95.289068, -95.288955, -95.295038, -95.301122, -95.307206, -95.313289, -95.319373, -95.325456, -95.33154, …
266	6726	G	NG15-02	Garden Banks	44866	0	0	0	0	0	2304	0	0	2304	2304	0	0	1	0	NA	1	44866	0.18374	0.00210325	list(c(-92.708831, -92.708845, -92.714911, -92.720976, -92.727042, -92.733108, -92.739173, -92.745239, -92.751305, -92.75737, -92.757359, -92.757347, -92.757335, -92.757323, -92.757311, -92.757299, -92.757288, -92.757276, -92.751208, -92.74514, -92.739072, -92.733004, -92.726936, -92.720868, -92.714799, -92.708731, -92.708746, -92.70876, -92.708774, -92.708788, -92.708802, -92.708817, -92.708831,…
267	6013	G	NG15-03	Green Canyon	44866	0	0	0	0	0	2304	0	0	2304	2304	0	0	1	0	NA	1	44866	0.184208	0.00211331	list(c(-91.438188, -91.432089, -91.42599, -91.419891, -91.413792, -91.407693, -91.401594, -91.395495, -91.389397, -91.389477, -91.389557, -91.389638, -91.389718, -91.389799, -91.389879, -91.389959, -91.390039, -91.396136, -91.402232, -91.408329, -91.414425, -91.420522, -91.426618, -91.432715, -91.438811, -91.438733, -91.438655, -91.438578, -91.4385, -91.438422, -91.438344, -91.438266, -91.438188,…
268	6527	G	NH16-10	Mississippi Canyon	44866	0	0	0	0	0	2304	0	0	2304	2304	0	0	1	0	NA	1	44866	0.184703	0.00212398	list(c(-88.765506, -88.765596, -88.765686, -88.765776, -88.765866, -88.765957, -88.766047, -88.766137, -88.766228, -88.760097, -88.753967, -88.747836, -88.741706, -88.735576, -88.729445, -88.723315, -88.717184, -88.717096, -88.717008, -88.716921, -88.716833, -88.716745, -88.716658, -88.71657, -88.716482, -88.72261, -88.728738, -88.734866, -88.740994, -88.747122, -88.75325, -88.759378, -88.765506,…
269	6535	G	NH16-10	Mississippi Canyon	44866	0	0	0	0	0	2304	0	0	2304	2304	0	0	1	0	NA	1	44866	0.184732	0.00212467	list(c(-88.367148, -88.373277, -88.373347, -88.373417, -88.373487, -88.373558, -88.373628, -88.373698, -88.373768, -88.373838, -88.367707, -88.361575, -88.355443, -88.349311, -88.343179, -88.337048, -88.330916, -88.324784, -88.324716, -88.324648, -88.324581, -88.324513, -88.324445, -88.324378, -88.32431, -88.324242, -88.330372, -88.336501, -88.34263, -88.34876, -88.354889, -88.361018, -88.367148,…
270	6676	G	NH15-11	Bouma Bank	44866	0	0	0	0	0	2304	0	0	2304	2304	0	0	1	0	NA	1	44866	0.184659	0.00212311	list(c(-92.706038, -92.706053, -92.712177, -92.718301, -92.724424, -92.730548, -92.736672, -92.742796, -92.74892, -92.755044, -92.755031, -92.755019, -92.755006, -92.754994, -92.754981, -92.754969, -92.754956, -92.754944, -92.748818, -92.742691, -92.736565, -92.730439, -92.724312, -92.718186, -92.71206, -92.705933, -92.705948, -92.705963, -92.705978, -92.705993, -92.706008, -92.706023, -92.706038…
271	6932	G	NH15-11	Bouma Bank	44866	0	0	0	0	0	2304	0	0	2304	2304	0	0	1	0	NA	1	44866	0.184456	0.00211875	list(c(-92.413274, -92.413303, -92.419414, -92.425525, -92.431637, -92.437748, -92.443859, -92.44997, -92.456081, -92.462193, -92.462166, -92.462139, -92.462111, -92.462084, -92.462057, -92.46203, -92.462003, -92.461976, -92.455862, -92.449749, -92.443635, -92.437521, -92.431408, -92.425294, -92.41918, -92.413067, -92.413096, -92.413126, -92.413155, -92.413185, -92.413215, -92.413244, -92.413274,…
272	6789	G	NH16-10	Mississippi Canyon	44866	0	0	0	0	0	2304	0	0	2304	2304	0	0	1	0	NA	1	44866	0.184547	0.00212069	list(c(-88.168623, -88.17474, -88.1748, -88.174859, -88.174919, -88.174978, -88.175038, -88.175097, -88.175157, -88.175216, -88.169096, -88.162977, -88.156857, -88.150737, -88.144617, -88.138497, -88.132377, -88.126257, -88.1262, -88.126143, -88.126086, -88.126029, -88.125972, -88.125915, -88.125858, -88.125801, -88.131918, -88.138036, -88.144153, -88.150271, -88.156388, -88.162505, -88.168623, 2…
273	6421	G	NH15-08	Port Arthur	44866	0	0	0	1729.129394716873	0	2304	0	2	574.871	2304	0	0	1	0	NA	1	44866	0.185797	0.00214772	list(c(-93, -92.993802, -92.987603, -92.981405, -92.975206, -92.969008, -92.962809, -92.956611, -92.950412, -92.950415, -92.950418, -92.95042, -92.950423, -92.950426, -92.950428, -92.950431, -92.950433, -92.956629, -92.962825, -92.969021, -92.975217, -92.981413, -92.987608, -92.993804, -93, -93, -93, -93, -93, -93, -93, -93, -93, 29.635528, 29.635528, 29.635527, 29.635527, 29.635526, 29.635524, 2…
274	6611	G	NH16-10	Mississippi Canyon	44866	0	0	0	0	0	2304	0	0	2304	2304	0	0	1	0	NA	1	44866	0.18454	0.00212034	list(c(-89.54144, -89.547559, -89.547688, -89.547818, -89.547947, -89.548077, -89.548207, -89.548336, -89.548466, -89.548596, -89.542474, -89.536353, -89.530231, -89.52411, -89.517988, -89.511866, -89.505745, -89.499623, -89.499496, -89.499369, -89.499241, -89.499114, -89.498987, -89.49886, -89.498733, -89.498606, -89.504725, -89.510844, -89.516964, -89.523083, -89.529202, -89.535321, -89.54144, …
275	7057	G	NG15-02	Garden Banks	44866	0	0	0	0	0	2304	0	0	2304	2304	0	0	1	0	NA	1	44866	0.183471	0.00209744	list(c(-93.671462, -93.677511, -93.677544, -93.677576, -93.677609, -93.677641, -93.677674, -93.677706, -93.677739, -93.677772, -93.67172, -93.665669, -93.659618, -93.653567, -93.647516, -93.641464, -93.635413, -93.629362, -93.629332, -93.629301, -93.629271, -93.629241, -93.629211, -93.62918, -93.62915, -93.62912, -93.635169, -93.641218, -93.647267, -93.653316, -93.659365, -93.665413, -93.671462, …
276	6036	G	NH16-07	Viosca Knoll	44866	0	0	0	0	0	2304	0	0	2304	2304	0	0	1	0	NA	1	44866	0.186094	0.00215408	list(c(-88.28682, -88.293035, -88.293105, -88.293175, -88.293245, -88.293315, -88.293385, -88.293455, -88.293525, -88.293596, -88.287378, -88.28116, -88.274942, -88.268724, -88.262506, -88.256288, -88.25007, -88.243852, -88.243784, -88.243717, -88.24365, -88.243582, -88.243515, -88.243448, -88.24338, -88.243313, -88.249528, -88.255744, -88.261959, -88.268174, -88.274389, -88.280605, -88.28682, 29…
277	6255	G	NG15-02	Garden Banks	44866	0	0	0	0	0	2304	0	0	2304	2304	0	0	1	0	NA	1	44866	0.184066	0.00211029	list(c(-93.773048, -93.779134, -93.779173, -93.779211, -93.77925, -93.779288, -93.779327, -93.779365, -93.779404, -93.779442, -93.773354, -93.767265, -93.761176, -93.755087, -93.748998, -93.742909, -93.73682, -93.730731, -93.730694, -93.730658, -93.730622, -93.730586, -93.73055, -93.730514, -93.730478, -93.730441, -93.736528, -93.742615, -93.748701, -93.754788, -93.760874, -93.766961, -93.773048,…
278	6370	G	NG15-03	Green Canyon	44866	0	0	0	0	0	2304	0	0	2304	2304	0	0	1	0	NA	1	44866	0.183911	0.00210685	list(c(-91.053989, -91.054085, -91.060163, -91.066241, -91.07232, -91.078398, -91.084476, -91.090554, -91.096633, -91.102711, -91.102618, -91.102524, -91.102431, -91.102337, -91.102244, -91.10215, -91.102057, -91.101963, -91.095882, -91.089802, -91.083721, -91.07764, -91.07156, -91.065479, -91.059399, -91.053318, -91.053414, -91.05351, -91.053606, -91.053702, -91.053798, -91.053894, -91.053989, 2…
279	6257	G	NG15-01	East Breaks	44866	0	0	0	0	0	2304	0	0	2304	2304	0	0	1	0	NA	1	44866	0.183889	0.00210625	list(c(-95.768367, -95.774445, -95.774582, -95.774719, -95.774856, -95.774993, -95.77513, -95.775268, -95.775405, -95.775542, -95.769461, -95.76338, -95.757299, -95.751218, -95.745137, -95.739056, -95.732975, -95.726894, -95.726759, -95.726624, -95.726489, -95.726354, -95.72622, -95.726085, -95.725951, -95.725816, -95.731895, -95.737973, -95.744052, -95.750131, -95.75621, -95.762288, -95.768367, …
280	6366	G	NH15-11	Bouma Bank	44866	0	0	0	0	0	2304	0	0	2304	2304	0	0	1	0	NA	1	44866	0.184897	0.00212827	list(c(-93.245558, -93.24557, -93.245583, -93.245596, -93.245608, -93.245621, -93.245633, -93.245646, -93.245659, -93.239517, -93.233376, -93.227234, -93.221093, -93.214952, -93.20881, -93.202669, -93.196527, -93.196517, -93.196507, -93.196497, -93.196487, -93.196477, -93.196467, -93.196456, -93.196446, -93.202585, -93.208724, -93.214863, -93.221002, -93.227141, -93.23328, -93.239419, -93.245558,…
281	7037	G	NG15-02	Garden Banks	44866	0	0	0	0	0	2304	0	0	2304	2304	0	0	1	0	NA	1	44866	0.183504	0.00209813	list(c(-92.176963, -92.177003, -92.183054, -92.189105, -92.195156, -92.201207, -92.207258, -92.213309, -92.21936, -92.225411, -92.225373, -92.225336, -92.225299, -92.225262, -92.225224, -92.225187, -92.22515, -92.225112, -92.219059, -92.213006, -92.206952, -92.200899, -92.194846, -92.188792, -92.182739, -92.176686, -92.176725, -92.176765, -92.176805, -92.176844, -92.176884, -92.176924, -92.176963…
282	6484	G	NH16-07	Viosca Knoll	44866	0	0	0	0	0	2304	0	0	2304	2304	0	0	1	0	NA	1	44866	0.185707	0.00214575	list(c(-88.38091, -88.387101, -88.387175, -88.387249, -88.387323, -88.387397, -88.387471, -88.387545, -88.387619, -88.387693, -88.3815, -88.375306, -88.369112, -88.362919, -88.356725, -88.350531, -88.344338, -88.338144, -88.338073, -88.338001, -88.33793, -88.337859, -88.337787, -88.337716, -88.337645, -88.337573, -88.343764, -88.349955, -88.356146, -88.362337, -88.368528, -88.374719, -88.38091, 2…
283	6526	G	NH16-10	Mississippi Canyon	44866	0	0	0	0	0	2304	0	0	2304	2304	0	0	1	0	NA	1	44866	0.184697	0.00212388	list(c(-88.765506, -88.771634, -88.777761, -88.783889, -88.790017, -88.796145, -88.802272, -88.8084, -88.814528, -88.81462, -88.814713, -88.814806, -88.814898, -88.814991, -88.815084, -88.815177, -88.815269, -88.809139, -88.803009, -88.796879, -88.790749, -88.784618, -88.778488, -88.772358, -88.766228, -88.766137, -88.766047, -88.765957, -88.765866, -88.765776, -88.765686, -88.765596, -88.765506,…
284	6177	G	NH16-10	Mississippi Canyon	44866	0	0	0	0	0	2304	0	0	2304	2304	0	0	1	0	NA	1	44866	0.184981	0.00213	list(c(-88.72214, -88.722051, -88.721961, -88.721872, -88.721783, -88.721694, -88.721605, -88.721516, -88.721427, -88.727573, -88.733718, -88.739864, -88.74601, -88.752155, -88.758301, -88.764446, -88.770592, -88.770683, -88.770775, -88.770866, -88.770958, -88.77105, -88.771141, -88.771233, -88.771325, -88.765177, -88.759029, -88.752881, -88.746732, -88.740584, -88.734436, -88.728288, -88.72214, …
285	6953	G	NH15-08	Port Arthur	44866	0	0	0	0	0	2304	0	0	2304	2304	0	0	1	0	NA	1	44866	0.185322	0.00213745	list(c(-93.881844, -93.888011, -93.888057, -93.888104, -93.88815, -93.888197, -93.888243, -93.88829, -93.888336, -93.888383, -93.882214, -93.876046, -93.869877, -93.863708, -93.857539, -93.85137, -93.845202, -93.839033, -93.838989, -93.838945, -93.838901, -93.838857, -93.838813, -93.838769, -93.838725, -93.838681, -93.844847, -93.851014, -93.85718, -93.863346, -93.869512, -93.875678, -93.881844, …
286	7117	G	NH15-10	Bay City	44866	0	0	0	0	0	2304	0	0	2304	2304	0	0	1	0	NA	1	44866	0.184185	0.00211275	list(c(-95.238646, -95.244742, -95.244854, -95.244967, -95.245079, -95.245191, -95.245303, -95.245415, -95.245528, -95.24564, -95.239541, -95.233443, -95.227344, -95.221246, -95.215147, -95.209049, -95.20295, -95.196851, -95.196741, -95.196632, -95.196522, -95.196412, -95.196302, -95.196192, -95.196083, -95.195973, -95.202069, -95.208166, -95.214262, -95.220358, -95.226454, -95.23255, -95.238646,…
287	7132	G	NH15-08	Port Arthur	44866	0	0	0	0	0	2304	0	0	2304	2304	0	0	1	0	NA	1	44866	0.185212	0.00213508	list(c(-92.408687, -92.408718, -92.414877, -92.421036, -92.427195, -92.433354, -92.439513, -92.445672, -92.451831, -92.45799, -92.457962, -92.457933, -92.457905, -92.457877, -92.457849, -92.45782, -92.457792, -92.457764, -92.451602, -92.445441, -92.439279, -92.433118, -92.426956, -92.420795, -92.414633, -92.408472, -92.408502, -92.408533, -92.408564, -92.408595, -92.408626, -92.408657, -92.408687…
288	6258	G	NG15-02	Garden Banks	44866	0	0	0	0	0	2304	0	0	2304	2304	0	0	1	0	NA	1	44866	0.184071	0.00211039	list(c(-93.626968, -93.633055, -93.633086, -93.633117, -93.633148, -93.63318, -93.633211, -93.633242, -93.633274, -93.633305, -93.627216, -93.621127, -93.615038, -93.608948, -93.602859, -93.59677, -93.590681, -93.584591, -93.584563, -93.584534, -93.584505, -93.584476, -93.584447, -93.584418, -93.584389, -93.58436, -93.590447, -93.596534, -93.602621, -93.608707, -93.614794, -93.620881, -93.626968,…
289	6230	G	NH15-12	Ewing Bank	44866	0	0	0	0	0	2304	0	0	2304	2304	0	0	1	0	NA	1	44866	0.184868	0.00212747	list(c(-90.590432, -90.58429, -90.578147, -90.572005, -90.565863, -90.559721, -90.553578, -90.547436, -90.541294, -90.541421, -90.541548, -90.541675, -90.541802, -90.541929, -90.542056, -90.542182, -90.542309, -90.548449, -90.554588, -90.560728, -90.566868, -90.573008, -90.579147, -90.585287, -90.591427, -90.591303, -90.591178, -90.591054, -90.59093, -90.590805, -90.590681, -90.590557, -90.590432…
290	6904	G	NG15-01	East Breaks	44866	0	0	0	0	0	2304	0	0	2304	2304	0	0	1	0	NA	1	44866	0.183384	0.0020953	list(c(-95.899499, -95.905546, -95.905686, -95.905826, -95.905966, -95.906106, -95.906246, -95.906387, -95.906527, -95.906667, -95.900618, -95.894569, -95.888519, -95.88247, -95.87642, -95.870371, -95.864321, -95.858272, -95.858134, -95.857996, -95.857858, -95.85772, -95.857582, -95.857445, -95.857307, -95.857169, -95.863217, -95.869264, -95.875311, -95.881358, -95.887405, -95.893452, -95.899499,…
291	6872	G	NG14-03	Corpus Christi	44866	0	0	0	0	0	2304	0	0	2304	2304	0	0	1	0	NA	1	44866	0.183527	0.00209855	list(c(-96.964695, -96.964793, -96.970847, -96.976901, -96.982955, -96.989009, -96.995064, -97.001118, -97.007172, -97.013226, -97.01313, -97.013034, -97.012938, -97.012842, -97.012746, -97.01265, -97.012554, -97.012458, -97.006401, -97.000344, -96.994288, -96.988231, -96.982175, -96.976118, -96.970062, -96.964005, -96.964104, -96.964202, -96.964301, -96.964399, -96.964498, -96.964596, -96.964695…
292	6758	G	NH15-12	Ewing Bank	44866	0	0	0	0	0	2304	0	0	2304	2304	0	0	1	0	NA	1	44866	0.184536	0.00212042	list(c(-91.629443, -91.629512, -91.635629, -91.641746, -91.647863, -91.65398, -91.660097, -91.666214, -91.67233, -91.678447, -91.678381, -91.678314, -91.678247, -91.67818, -91.678113, -91.678046, -91.677979, -91.677912, -91.671792, -91.665673, -91.659554, -91.653434, -91.647315, -91.641196, -91.635076, -91.628957, -91.629026, -91.629096, -91.629165, -91.629235, -91.629304, -91.629374, -91.629443,…
293	6128	G	NH16-10	Mississippi Canyon	44866	0	0	0	0	0	2304	0	0	2304	2304	0	0	1	0	NA	1	44866	0.185025	0.00213097	list(c(-88.672953, -88.679102, -88.68525, -88.691398, -88.697547, -88.703695, -88.709843, -88.715992, -88.72214, -88.722229, -88.722318, -88.722407, -88.722497, -88.722586, -88.722675, -88.722765, -88.722854, -88.716703, -88.710552, -88.704402, -88.698251, -88.6921, -88.685949, -88.679798, -88.673647, -88.67356, -88.673474, -88.673387, -88.6733, -88.673213, -88.673127, -88.67304, -88.672953, 28.8…
294	6906	G	NH15-11	Bouma Bank	44866	0	0	0	0	0	2304	0	0	2304	2304	0	0	1	0	NA	1	44866	0.184452	0.00211864	list(c(-93.727251, -93.733362, -93.733399, -93.733436, -93.733473, -93.73351, -93.733547, -93.733584, -93.733621, -93.733658, -93.727544, -93.721431, -93.715318, -93.709204, -93.703091, -93.696977, -93.690864, -93.68475, -93.684716, -93.684681, -93.684647, -93.684612, -93.684578, -93.684543, -93.684509, -93.684474, -93.690585, -93.696696, -93.702807, -93.708918, -93.715029, -93.72114, -93.727251,…
295	6980	G	NH15-07	Houston	44866	0	0	0	0	0	2304	0	0	2304	2304	0	0	1	0	NA	1	44866	0.18528	0.00213649	list(c(-94.578516, -94.578599, -94.578681, -94.578764, -94.578847, -94.57893, -94.579012, -94.579095, -94.579178, -94.573011, -94.566844, -94.560678, -94.554511, -94.548344, -94.542177, -94.53601, -94.529843, -94.529763, -94.529683, -94.529603, -94.529523, -94.529442, -94.529362, -94.529282, -94.529202, -94.535367, -94.541531, -94.547695, -94.553859, -94.560024, -94.566188, -94.572352, -94.578516…
296	6411	G	NH16-10	Mississippi Canyon	44866	0	0	0	0	0	2304	0	0	2304	2304	0	0	1	0	NA	1	44866	0.184698	0.00212376	list(c(-89.545592, -89.551721, -89.551851, -89.551982, -89.552113, -89.552244, -89.552374, -89.552505, -89.552636, -89.552767, -89.546635, -89.540504, -89.534372, -89.528241, -89.522109, -89.515978, -89.509846, -89.503714, -89.503586, -89.503457, -89.503329, -89.503201, -89.503073, -89.502944, -89.502816, -89.502688, -89.508817, -89.514946, -89.521076, -89.527205, -89.533334, -89.539463, -89.5455…
297	6972	G	NH15-10	Bay City	44866	0	0	0	0	0	2304	0	0	2304	2304	0	0	1	0	NA	1	44866	0.18432782290421099	0.00211583	list(c(-94.954446, -94.960551, -94.966656, -94.972761, -94.978865, -94.98497, -94.991074, -94.997179, -95.003283, -95.003384, -95.003485, -95.003585, -95.003686, -95.003787, -95.003888, -95.003988, -95.004089, -94.997982, -94.991875, -94.985768, -94.979661, -94.973554, -94.967447, -94.96134, -94.955232, -94.955134, -94.955036, -94.954937, -94.954839, -94.954741, -94.954643, -94.954545, -94.954446…
298	6336	G	NG15-02	Garden Banks	44866	0	0	0	0	0	2304	0	0	2304	2304	0	0	1	0	NA	1	44866	0.184029	0.00210948	list(c(-92.221135, -92.221174, -92.227258, -92.233342, -92.239426, -92.24551, -92.251594, -92.257679, -92.263763, -92.269847, -92.269811, -92.269775, -92.269739, -92.269703, -92.269667, -92.269631, -92.269595, -92.269559, -92.263472, -92.257385, -92.251299, -92.245212, -92.239126, -92.233039, -92.226952, -92.220866, -92.220904, -92.220943, -92.220981, -92.22102, -92.221058, -92.221097, -92.221135…
299	7129	G	NH16-10	Mississippi Canyon	44866	0	0	0	0	0	2304	0	0	2304	2304	0	0	1	0	NA	1	44866	0.184243	0.00211404	list(c(-88.660057, -88.653956, -88.647855, -88.641754, -88.635653, -88.629551, -88.62345, -88.617349, -88.611248, -88.611167, -88.611087, -88.611006, -88.610925, -88.610845, -88.610764, -88.610684, -88.610603, -88.616702, -88.622801, -88.6289, -88.634998, -88.641097, -88.647196, -88.653295, -88.659393, -88.659476, -88.659559, -88.659642, -88.659725, -88.659808, -88.659891, -88.659974, -88.660057,…
300	7138	G	NH16-10	Mississippi Canyon	44866	0	0	0	0	0	2304	0	0	2304	2304	0	0	1	0	NA	1	44866	0.184273	0.00211476	list(c(-88.214138, -88.220238, -88.220299, -88.22036, -88.220421, -88.220482, -88.220543, -88.220604, -88.220665, -88.220726, -88.214624, -88.208521, -88.202419, -88.196316, -88.190214, -88.184111, -88.178008, -88.171906, -88.171847, -88.171788, -88.17173, -88.171671, -88.171613, -88.171554, -88.171495, -88.171437, -88.177537, -88.183637, -88.189737, -88.195838, -88.201938, -88.208038, -88.214138…
301	7102	G	NH15-10	Bay City	44866	0	0	0	0	0	2304	0	0	2304	2304	0	0	1	0	NA	1	44866	0.184091	0.00211057	list(c(-95.969925, -95.976017, -95.976165, -95.976314, -95.976462, -95.976611, -95.97676, -95.976908, -95.977057, -95.977206, -95.971112, -95.965018, -95.958923, -95.952829, -95.946735, -95.94064, -95.934546, -95.928452, -95.928305, -95.928159, -95.928013, -95.927866, -95.92772, -95.927574, -95.927428, -95.927282, -95.933374, -95.939466, -95.945558, -95.95165, -95.957742, -95.963833, -95.969925, …
302	6725	G	NG15-03	Green Canyon	44866	0	0	0	0	0	2304	0	0	2304	2304	0	0	1	0	NA	1	44866	0.183623	0.00210061	list(c(-90.816861, -90.816967, -90.823027, -90.829088, -90.835148, -90.841209, -90.847269, -90.85333, -90.859391, -90.865451, -90.865347, -90.865244, -90.86514, -90.865036, -90.864932, -90.864829, -90.864725, -90.864621, -90.858558, -90.852495, -90.846432, -90.840369, -90.834306, -90.828243, -90.82218, -90.816118, -90.816224, -90.81633, -90.816436, -90.816542, -90.816649, -90.816755, -90.816861, …
303	6026	G	NG14-06	Port Isabel	44866	0	0	0	0	0	2304	0	0	2304	2304	0	0	1	0	NA	1	44866	0.183288	0.00209334	list(c(-96.776104, -96.77621, -96.782249, -96.788289, -96.794328, -96.800367, -96.806407, -96.812446, -96.818486, -96.824525, -96.824421, -96.824317, -96.824213, -96.824109, -96.824005, -96.823901, -96.823797, -96.823693, -96.817651, -96.811609, -96.805568, -96.799526, -96.793484, -96.787443, -96.781401, -96.775359, -96.775466, -96.775572, -96.775679, -96.775785, -96.775891, -96.775998, -96.77610…
304	6277	G	NG14-03	Corpus Christi	44866	0	0	0	0	0	2304	0	0	2304	2304	0	0	1	0	NA	1	44866	0.183953	0.00210767	list(c(-96.711837, -96.71195, -96.718032, -96.724113, -96.730194, -96.736276, -96.742357, -96.748439, -96.75452, -96.760602, -96.760491, -96.76038, -96.76027, -96.760159, -96.760048, -96.759937, -96.759827, -96.759716, -96.753632, -96.747548, -96.741464, -96.73538, -96.729297, -96.723213, -96.717129, -96.711045, -96.711159, -96.711272, -96.711385, -96.711498, -96.711611, -96.711724, -96.711837, 2…
305	6402	G	NG15-02	Garden Banks	44866	0	0	0	0	0	2304	0	0	2304	2304	0	0	1	0	NA	1	44866	0.183947	0.00210769	list(c(-93.918035, -93.924114, -93.924159, -93.924204, -93.92425, -93.924295, -93.924341, -93.924386, -93.924432, -93.924477, -93.918396, -93.912314, -93.906233, -93.900151, -93.89407, -93.887988, -93.881907, -93.875825, -93.875782, -93.875739, -93.875696, -93.875653, -93.87561, -93.875567, -93.875524, -93.875481, -93.88156, -93.887639, -93.893718, -93.899797, -93.905876, -93.911955, -93.918035, …
306	6992	G	NH15-10	Bay City	44866	0	0	0	0	0	2304	0	0	2304	2304	0	0	1	0	NA	1	44866	0.1844	0.00211751	list(c(-94.020153, -94.026261, -94.026313, -94.026364, -94.026416, -94.026468, -94.026519, -94.026571, -94.026622, -94.026674, -94.020564, -94.014453, -94.008343, -94.002233, -93.996122, -93.990012, -93.983901, -93.977791, -93.977742, -93.977692, -93.977643, -93.977594, -93.977545, -93.977496, -93.977447, -93.977398, -93.983506, -93.989614, -93.995722, -94.001829, -94.007937, -94.014045, -94.0201…
307	6253	G	NH15-12	Ewing Bank	44866	0	0	0	0	0	2304	0	0	2304	2304	0	0	1	0	NA	1	44866	0.184947	0.00212932	list(c(-91.869533, -91.869591, -91.875733, -91.881876, -91.888019, -91.894161, -91.900304, -91.906446, -91.912589, -91.918732, -91.918676, -91.91862, -91.918565, -91.918509, -91.918453, -91.918397, -91.918341, -91.918286, -91.91214, -91.905995, -91.89985, -91.893705, -91.88756, -91.881415, -91.875269, -91.869124, -91.869183, -91.869241, -91.869299, -91.869358, -91.869416, -91.869474, -91.869533, …
308	6237	G	NG15-03	Green Canyon	44866	0	0	0	0	0	2304	0	0	2304	2304	0	0	1	0	NA	1	44866	0.183928	0.0021071	list(c(-90.224458, -90.230539, -90.23662, -90.242701, -90.248782, -90.254863, -90.260944, -90.267025, -90.273106, -90.272972, -90.272837, -90.272702, -90.272567, -90.272432, -90.272297, -90.272162, -90.272027, -90.265943, -90.259859, -90.253776, -90.247692, -90.241609, -90.235526, -90.229442, -90.223359, -90.223496, -90.223634, -90.223771, -90.223909, -90.224046, -90.224184, -90.224321, -90.22445…
309	6533	G	NH15-10	Bay City	44866	0	0	0	0	0	2304	0	0	2304	2304	0	0	1	0	NA	1	44866	0.184727	0.00212452	list(c(-94.465213, -94.471342, -94.471418, -94.471493, -94.471568, -94.471643, -94.471718, -94.471794, -94.471869, -94.471944, -94.465813, -94.459681, -94.45355, -94.447418, -94.441287, -94.435155, -94.429023, -94.422892, -94.422819, -94.422746, -94.422674, -94.422601, -94.422528, -94.422456, -94.422383, -94.42231, -94.428439, -94.434568, -94.440698, -94.446827, -94.452956, -94.459085, -94.465213…
310	6568	G	NH15-11	Bouma Bank	44866	0	0	0	0	0	2304	0	0	2304	2304	0	0	1	0	NA	1	44866	0.184738	0.00212483	list(c(-93.140965, -93.147094, -93.147101, -93.147109, -93.147116, -93.147124, -93.147131, -93.147139, -93.147146, -93.147154, -93.141023, -93.134891, -93.12876, -93.122628, -93.116497, -93.110366, -93.104234, -93.098103, -93.098098, -93.098093, -93.098088, -93.098083, -93.098078, -93.098073, -93.098068, -93.098063, -93.104192, -93.11032, -93.116449, -93.122578, -93.128707, -93.134836, -93.140965…
311	6436	G	NG14-03	Corpus Christi	44866	0	0	0	0	0	2304	0	0	2304	2304	0	0	1	0	NA	1	44866	0.183782	0.00210396	list(c(-96.276332, -96.276466, -96.2766, -96.276734, -96.276867, -96.277001, -96.277135, -96.277269, -96.277402, -96.283474, -96.289546, -96.295617, -96.301689, -96.307761, -96.313833, -96.319905, -96.325977, -96.325845, -96.325714, -96.325583, -96.325451, -96.32532, -96.325188, -96.325057, -96.324925, -96.318851, -96.312777, -96.306703, -96.300628, -96.294554, -96.28848, -96.282406, -96.276332, …
312	6822	G	NH15-10	Bay City	44866	0	0	0	0	0	2304	0	0	2304	2304	0	0	1	0	NA	1	44866	0.184444	0.00211836	list(c(-94.999594, -95.005706, -95.005807, -95.005908, -95.00601, -95.006111, -95.006212, -95.006314, -95.006415, -95.006517, -95.000402, -94.994288, -94.988173, -94.982059, -94.975944, -94.96983, -94.963715, -94.957601, -94.957502, -94.957403, -94.957304, -94.957205, -94.957106, -94.957007, -94.956908, -94.95681, -94.962922, -94.969034, -94.975146, -94.981258, -94.98737, -94.993482, -94.999594, …
313	6883	G	NG15-03	Green Canyon	44866	0	0	0	0	0	2304	0	0	2304	2304	0	0	1	0	NA	1	44866	0.183467	0.00209717	list(c(-90.43215, -90.438202, -90.444253, -90.450305, -90.456356, -90.462408, -90.468459, -90.474511, -90.480562, -90.480441, -90.480319, -90.480197, -90.480075, -90.479953, -90.479832, -90.47971, -90.479588, -90.473534, -90.46748, -90.461426, -90.455372, -90.449319, -90.443265, -90.437211, -90.431157, -90.431282, -90.431406, -90.43153, -90.431654, -90.431778, -90.431902, -90.432026, -90.43215, 2…
314	6538	G	NG15-02	Garden Banks	44866	0	0	0	0	0	2304	0	0	2304	2304	0	0	1	0	NA	1	44866	0.183873	0.00210611	list(c(-92.125163, -92.125206, -92.131281, -92.137355, -92.143429, -92.149504, -92.155578, -92.161653, -92.167727, -92.173802, -92.173761, -92.173721, -92.17368, -92.17364, -92.173599, -92.173559, -92.173518, -92.173478, -92.167401, -92.161324, -92.155247, -92.14917, -92.143093, -92.137017, -92.13094, -92.124863, -92.124906, -92.124949, -92.124992, -92.125035, -92.125078, -92.125121, -92.125163, …
315	7129	G	NH15-10	Bay City	44866	0	0	0	0	0	2304	0	0	2304	2304	0	0	1	0	NA	1	44866	0.184243	0.00211404	list(c(-94.653295, -94.659393, -94.659476, -94.659559, -94.659642, -94.659725, -94.659808, -94.659891, -94.659974, -94.660057, -94.653956, -94.647855, -94.641754, -94.635653, -94.629551, -94.62345, -94.617349, -94.611248, -94.611167, -94.611087, -94.611006, -94.610925, -94.610845, -94.610764, -94.610684, -94.610603, -94.616702, -94.622801, -94.6289, -94.634998, -94.641097, -94.647196, -94.653295,…
316	6507	G	NH15-12	Ewing Bank	44866	0	0	0	0	0	2304	0	0	2304	2304	0	0	1	0	NA	1	44866	0.184736	0.00212474	list(c(-91.67569, -91.675758, -91.681887, -91.688017, -91.694146, -91.700276, -91.706405, -91.712535, -91.718664, -91.724794, -91.724728, -91.724663, -91.724598, -91.724533, -91.724468, -91.724403, -91.724337, -91.724272, -91.71814, -91.712008, -91.705876, -91.699744, -91.693612, -91.68748, -91.681348, -91.675216, -91.675284, -91.675352, -91.675419, -91.675487, -91.675555, -91.675622, -91.67569, …
317	6275	G	NH15-12	Ewing Bank	44866	0	0	0	0	0	2304	0	0	2304	2304	0	0	1	0	NA	1	44866	0.184857	0.00212726	list(c(-90.837047, -90.830906, -90.824765, -90.818624, -90.812483, -90.806342, -90.800201, -90.79406, -90.787919, -90.788033, -90.788147, -90.788261, -90.788375, -90.788489, -90.788603, -90.788717, -90.788831, -90.794969, -90.801108, -90.807246, -90.813385, -90.819523, -90.825662, -90.8318, -90.837939, -90.837827, -90.837716, -90.837605, -90.837493, -90.837382, -90.83727, -90.837159, -90.837047, …
318	6485	G	NH16-10	Mississippi Canyon	44866	0	0	0	0	0	2304	0	0	2304	2304	0	0	1	0	NA	1	44866	0.184772	0.00212552	list(c(-88.374401, -88.368267, -88.362133, -88.355998, -88.349864, -88.34373, -88.337595, -88.331461, -88.325326, -88.325259, -88.325191, -88.325123, -88.325055, -88.324987, -88.324919, -88.324852, -88.324784, -88.330916, -88.337048, -88.343179, -88.349311, -88.355443, -88.361575, -88.367707, -88.373838, -88.373909, -88.373979, -88.374049, -88.37412, -88.37419, -88.37426, -88.374331, -88.374401, …
319	6236	G	NH16-10	Mississippi Canyon	44866	0	0	0	0	0	2304	0	0	2304	2304	0	0	1	0	NA	1	44866	0.184975	0.00212989	list(c(-88.321365, -88.327509, -88.327578, -88.327646, -88.327715, -88.327784, -88.327852, -88.327921, -88.327989, -88.328058, -88.321911, -88.315764, -88.309617, -88.30347, -88.297323, -88.291175, -88.285028, -88.278881, -88.278815, -88.278749, -88.278683, -88.278617, -88.278551, -88.278485, -88.278419, -88.278353, -88.284497, -88.290642, -88.296787, -88.302931, -88.309076, -88.31522, -88.321365…
320	7012	G	NH15-11	Bouma Bank	44866	0	0	0	0	0	2304	0	0	2304	2304	0	0	1	0	NA	1	44866	0.184381	0.00211714	list(c(-93.43985, -93.433741, -93.427632, -93.421523, -93.415414, -93.409305, -93.403196, -93.397087, -93.390979, -93.390959, -93.390939, -93.39092, -93.3909, -93.39088, -93.390861, -93.390841, -93.390822, -93.396928, -93.403034, -93.409141, -93.415247, -93.421354, -93.42746, -93.433567, -93.439673, -93.439695, -93.439717, -93.439739, -93.439761, -93.439783, -93.439806, -93.439828, -93.43985, 28.…
321	6528	G	NH15-11	Bouma Bank	44866	0	0	0	0	0	2304	0	0	2304	2304	0	0	1	0	NA	1	44866	0.184774	0.00212563	list(c(-92.656643, -92.656625, -92.656608, -92.65659, -92.656573, -92.656555, -92.656537, -92.65652, -92.656502, -92.650369, -92.644235, -92.638101, -92.631967, -92.625833, -92.6197, -92.613566, -92.607432, -92.607452, -92.607472, -92.607492, -92.607512, -92.607533, -92.607553, -92.607573, -92.607593, -92.613724, -92.619855, -92.625986, -92.632118, -92.638249, -92.64438, -92.650512, -92.656643, 2…
322	6629	G	NG15-02	Garden Banks	44866	0	0	0	0	0	2304	0	0	2304	2304	0	0	1	0	NA	1	44866	0.183812	0.00210482	list(c(-92.562759, -92.56278, -92.562802, -92.562823, -92.562844, -92.562866, -92.562887, -92.562908, -92.56293, -92.569, -92.57507, -92.58114, -92.587211, -92.593281, -92.599351, -92.605422, -92.611492, -92.611473, -92.611454, -92.611435, -92.611416, -92.611397, -92.611378, -92.611359, -92.61134, -92.605267, -92.599195, -92.593122, -92.587049, -92.580977, -92.574904, -92.568831, -92.562759, 27.4…
323	7033	G	NH16-07	Viosca Knoll	44866	0	0	0	0	0	2304	0	0	2304	2304	0	0	1	0	NA	1	44866	0.185249	0.00213587	list(c(-88.380675, -88.386837, -88.392999, -88.399161, -88.405323, -88.411486, -88.417648, -88.42381, -88.429972, -88.430047, -88.430121, -88.430196, -88.430271, -88.430346, -88.430421, -88.430495, -88.43057, -88.424406, -88.418241, -88.412076, -88.405912, -88.399747, -88.393582, -88.387417, -88.381252, -88.38118, -88.381108, -88.381036, -88.380963, -88.380891, -88.380819, -88.380747, -88.380675,…
324	6406	G	NH15-08	Port Arthur	44866	0	0	0	1299.9932292827712	0	2304	0	2	1004.0067707172575	2304.0000000000286	0	0	1	0	NA	1	44866	0.185783	0.00214741	list(c(-93.737277, -93.743472, -93.743511, -93.743551, -93.743591, -93.743631, -93.74367, -93.74371, -93.74375, -93.74379, -93.737592, -93.731394, -93.725196, -93.718998, -93.7128, -93.706603, -93.700405, -93.694207, -93.69417, -93.694133, -93.694095, -93.694058, -93.694021, -93.693984, -93.693947, -93.69391, -93.700105, -93.706301, -93.712496, -93.718691, -93.724886, -93.731081, -93.737277, 29.5…
325	6515	G	NH16-10	Mississippi Canyon	44866	0	0	0	0	0	2304	0	0	2304	2304	0	0	1	0	NA	1	44866	0.184642	0.00212259	list(c(-89.304649, -89.310775, -89.3169, -89.323025, -89.32915, -89.335276, -89.341401, -89.347526, -89.353651, -89.353771, -89.353891, -89.354011, -89.354132, -89.354252, -89.354372, -89.354492, -89.354613, -89.348485, -89.342357, -89.33623, -89.330102, -89.323974, -89.317847, -89.311719, -89.305591, -89.305473, -89.305356, -89.305238, -89.30512, -89.305002, -89.304885, -89.304767, -89.304649, 2…
326	6733	G	NH15-10	Bay City	44866	0	0	0	0	0	2304	0	0	2304	2304	0	0	1	0	NA	1	44866	0.184568	0.00212111	list(c(-94.46283, -94.468949, -94.469024, -94.469098, -94.469173, -94.469247, -94.469322, -94.469396, -94.469471, -94.469546, -94.463424, -94.457303, -94.451181, -94.44506, -94.438938, -94.432816, -94.426695, -94.420573, -94.420501, -94.420429, -94.420357, -94.420285, -94.420213, -94.420141, -94.420069, -94.419997, -94.426116, -94.432235, -94.438354, -94.444473, -94.450592, -94.456711, -94.46283,…
327	6423	G	NH15-08	Port Arthur	44866	0	0	0	1264.4387106270456	0	2304	1039.5612893729547	1	0	1264.4387106270456	0	0	1	0	NA	1	44866	0.150878	0.00117855	list(c(-92.851293, -92.851301, -92.857496, -92.863692, -92.869888, -92.876084, -92.88228, -92.888475, -92.894671, -92.900867, -92.900862, -92.900856, -92.900851, -92.900846, -92.900841, -92.900835, -92.900834, -92.89213, -92.890879, -92.889616, -92.85508, -92.851281, -92.851285, -92.851293, 29.597539, 29.592124, 29.592131, 29.592137, 29.592143, 29.592149, 29.592155, 29.59216, 29.592165, 29.59217,…
328	6463	G	NG15-02	Garden Banks	44866	0	0	0	0	0	2304	0	18	2304	2304	0	0	1	0	NA	1	44866	0.183926	0.00210727	list(c(-93.340345, -93.346422, -93.3525, -93.358577, -93.364655, -93.370732, -93.37681, -93.382887, -93.388965, -93.388984, -93.389003, -93.389022, -93.389041, -93.38906, -93.389079, -93.389098, -93.389117, -93.383038, -93.376958, -93.370878, -93.364798, -93.358718, -93.352638, -93.346558, -93.340478, -93.340462, -93.340445, -93.340428, -93.340412, -93.340395, -93.340378, -93.340361, -93.340345, …
329	6432	G	NG15-02	Garden Banks	44866	0	0	0	0	0	2304	0	0	2304	2304	0	0	1	0	NA	1	44866	0.183957	0.00210799	list(c(-92.416302, -92.416331, -92.42241, -92.42849, -92.43457, -92.440649, -92.446729, -92.452809, -92.458888, -92.464968, -92.464942, -92.464915, -92.464889, -92.464863, -92.464836, -92.46481, -92.464784, -92.464757, -92.458675, -92.452593, -92.446511, -92.440429, -92.434347, -92.428265, -92.422183, -92.416101, -92.41613, -92.416158, -92.416187, -92.416216, -92.416245, -92.416273, -92.416302, 2…
330	6332	G	NH15-11	Bouma Bank	44866	0	0	0	0	0	2304	0	0	2304	2304	0	0	1	0	NA	1	44866	0.18493	0.00212898	list(c(-92.410399, -92.41043, -92.416571, -92.422712, -92.428853, -92.434994, -92.441135, -92.447277, -92.453418, -92.459559, -92.459531, -92.459503, -92.459475, -92.459448, -92.45942, -92.459392, -92.459364, -92.459336, -92.453192, -92.447049, -92.440905, -92.434761, -92.428618, -92.422474, -92.416331, -92.410187, -92.410217, -92.410248, -92.410278, -92.410308, -92.410339, -92.410369, -92.410399…
331	6480	G	NG14-06	Port Isabel	44866	0	0	0	0	0	2304	0	0	2304	2304	0	0	1	0	NA	1	44866	0.18294	0.00208581	list(c(-96.591084, -96.591197, -96.597215, -96.603233, -96.609251, -96.615269, -96.621286, -96.627304, -96.633322, -96.63934, -96.639229, -96.639118, -96.639008, -96.638897, -96.638786, -96.638675, -96.638563, -96.638452, -96.632432, -96.626412, -96.620392, -96.614372, -96.608352, -96.602331, -96.596311, -96.590291, -96.590405, -96.590518, -96.590631, -96.590745, -96.590858, -96.590971, -96.59108…
332	7041	G	NG14-06	Port Isabel	44866	0	0	0	0	0	2304	0	0	2304	2304	0	0	1	0	NA	1	44866	0.182483	0.00207582	list(c(-96.121676, -96.121544, -96.121411, -96.121279, -96.121147, -96.121014, -96.120882, -96.120749, -96.120616, -96.114624, -96.108631, -96.102639, -96.096646, -96.090654, -96.084661, -96.078669, -96.072676, -96.072811, -96.072946, -96.073081, -96.073215, -96.07335, -96.073484, -96.073619, -96.073753, -96.079744, -96.085734, -96.091724, -96.097714, -96.103705, -96.109695, -96.115686, -96.12167…
333	6480	G	NH15-10	Bay City	44866	0	0	0	0	0	2304	0	0	2304	2304	0	0	1	0	NA	1	44866	0.184756	0.00212512	list(c(-94.612961, -94.619092, -94.619175, -94.619258, -94.619341, -94.619424, -94.619507, -94.61959, -94.619673, -94.619756, -94.613622, -94.607489, -94.601355, -94.595222, -94.589088, -94.582955, -94.576821, -94.570687, -94.570607, -94.570527, -94.570446, -94.570366, -94.570285, -94.570205, -94.570125, -94.570044, -94.576175, -94.582306, -94.588438, -94.594569, -94.6007, -94.606831, -94.612961,…
334	6361	G	NG15-02	Garden Banks	44866	0	0	0	0	0	2304	0	0	2304	2304	0	0	1	0	NA	1	44866	0.183999	0.00210887	list(c(-93.480504, -93.486586, -93.48661, -93.486634, -93.486658, -93.486682, -93.486706, -93.48673, -93.486754, -93.486778, -93.480693, -93.474608, -93.468524, -93.462439, -93.456355, -93.45027, -93.444186, -93.438101, -93.438079, -93.438058, -93.438036, -93.438015, -93.437993, -93.437971, -93.43795, -93.437928, -93.44401, -93.450093, -93.456175, -93.462257, -93.468339, -93.474421, -93.480504, 2…
335	6364	G	NG15-02	Garden Banks	44866	0	0	0	0	0	2304	0	18	2304	2304	0	0	1	0	NA	1	44866	0.184003	0.00210891	list(c(-93.33453, -93.340613, -93.340629, -93.340646, -93.340663, -93.34068, -93.340696, -93.340713, -93.34073, -93.340747, -93.334662, -93.328577, -93.322493, -93.316408, -93.310323, -93.304239, -93.298154, -93.292069, -93.292055, -93.29204, -93.292026, -93.292012, -93.291997, -93.291983, -93.291969, -93.291954, -93.298036, -93.304119, -93.310201, -93.316283, -93.322366, -93.328448, -93.33453, 2…
336	6338	G	NH15-11	Bouma Bank	44866	0	0	0	0	0	2304	0	0	2304	2304	0	0	1	0	NA	1	44866	0.184918	0.00212873	list(c(-92.115623, -92.115669, -92.121809, -92.12795, -92.134091, -92.140231, -92.146372, -92.152513, -92.158653, -92.164794, -92.164751, -92.164708, -92.164665, -92.164622, -92.164579, -92.164536, -92.164493, -92.16445, -92.158307, -92.152163, -92.14602, -92.139877, -92.133734, -92.127591, -92.121448, -92.115305, -92.11535, -92.115396, -92.115441, -92.115487, -92.115532, -92.115578, -92.115623, …
337	6641	G	NG15-03	Green Canyon	44866	0	0	0	0	0	2304	0	0	2304	2304	0	0	1	0	NA	1	44866	0.183598	0.00209996	list(c(-90.039059, -90.039203, -90.045264, -90.051324, -90.057385, -90.063446, -90.069507, -90.075568, -90.081628, -90.087689, -90.087547, -90.087406, -90.087264, -90.087122, -90.086979, -90.086837, -90.086695, -90.086553, -90.08049, -90.074427, -90.068363, -90.0623, -90.056237, -90.050174, -90.044111, -90.038048, -90.038192, -90.038337, -90.038481, -90.038626, -90.03877, -90.038914, -90.039059, …
338	6715	G	NH15-08	Port Arthur	44866	0	0	0	0	0	2304	0	0	2304	2304	0	0	1	0	NA	1	44866	0.185544	0.00214226	list(c(-93.247201, -93.25338, -93.25956, -93.26574, -93.27192, -93.2781, -93.28428, -93.29046, -93.29664, -93.296656, -93.296671, -93.296687, -93.296703, -93.296719, -93.296734, -93.29675, -93.296766, -93.290583, -93.284401, -93.278218, -93.272035, -93.265853, -93.25967, -93.253488, -93.247305, -93.247292, -93.247279, -93.247266, -93.247253, -93.24724, -93.247227, -93.247214, -93.247201, 29.33204…
339	6923	G	NH16-07	Viosca Knoll	44866	0	0	0	1823.2853966693567	0	2304	480.7146033306435	1	0	1823.2853966693567	0	0	1	0	NA	1	44866	0.165332	0.00169115	list(c(-88.912146, -88.914794, -88.914694, -88.914267, -88.913909, -88.91362, -88.913402, -88.913255, -88.913179, -88.913173, -88.913239, -88.913376, -88.913583, -88.913861, -88.914209, -88.914626, -88.915111, -88.915586, -88.916124, -88.916723, -88.917383, -88.918103, -88.917039, -88.916034, -88.91509, -88.914209, -88.913391, -88.912639, -88.90678, -88.900612, -88.894444, -88.888276, -88.882108,…
340	6091	G	NG14-03	Corpus Christi	44866	0	0	0	0	0	2304	0	0	2304	2304	0	0	1	0	NA	1	44866	0.184013	0.0021089	list(c(-96.026354, -96.03244, -96.038527, -96.044614, -96.050701, -96.056788, -96.062875, -96.068962, -96.07505, -96.074904, -96.074759, -96.074613, -96.074468, -96.074322, -96.074176, -96.074031, -96.073885, -96.067796, -96.061706, -96.055617, -96.049527, -96.043438, -96.037348, -96.031259, -96.02517, -96.025318, -96.025466, -96.025614, -96.025762, -96.02591, -96.026058, -96.026206, -96.026354, …
341	6386	G	NG14-03	Corpus Christi	44866	0	0	0	0	0	2304	0	0	2304	2304	0	0	1	0	NA	1	44866	0.183821	0.0021048	list(c(-96.276332, -96.282406, -96.28848, -96.294554, -96.300628, -96.306703, -96.312777, -96.318851, -96.324925, -96.324794, -96.324662, -96.324531, -96.324399, -96.324267, -96.324135, -96.324004, -96.323872, -96.317795, -96.311718, -96.305642, -96.299565, -96.293489, -96.287412, -96.281336, -96.275259, -96.275393, -96.275528, -96.275662, -96.275796, -96.27593, -96.276064, -96.276198, -96.276332…
342	6677	G	NH15-11	Bouma Bank	44866	0	0	0	0	0	2304	0	0	2304	2304	0	0	1	0	NA	1	44866	0.184658	0.0021231	list(c(-92.657045, -92.657062, -92.663186, -92.66931, -92.675434, -92.681558, -92.687681, -92.693805, -92.699929, -92.706053, -92.706038, -92.706023, -92.706008, -92.705993, -92.705978, -92.705963, -92.705948, -92.705933, -92.699807, -92.693681, -92.687554, -92.681428, -92.675302, -92.669175, -92.663049, -92.656923, -92.65694, -92.656958, -92.656975, -92.656993, -92.65701, -92.657027, -92.657045,…
343	6863	G	NH15-10	Bay City	44866	0	0	0	0	0	2304	0	0	2304	2304	0	0	1	0	NA	1	44866	0.184356	0.00211641	list(c(-95.445684, -95.439574, -95.433464, -95.427355, -95.421245, -95.415135, -95.409025, -95.402915, -95.396805, -95.396684, -95.396564, -95.396443, -95.396322, -95.396201, -95.39608, -95.39596, -95.395839, -95.401946, -95.408054, -95.414161, -95.420268, -95.426376, -95.432483, -95.43859, -95.444697, -95.444821, -95.444944, -95.445067, -95.44519, -95.445314, -95.445437, -95.44556, -95.445684, 2…
344	6026	G	NG14-03	Corpus Christi	44866	0	0	0	28.004767467393048	0	2304	2275.995232532607	1	0	28.004767467393048	0	0	1	0	NA	1	44866	0.0244887	2.56665015e-5	list(c(-96.756041, -96.756153, -96.762247, -96.763478, -96.756192, -96.756008, -96.756041, 27.932941, 27.927529, 27.927628, 27.927648, 27.934365, 27.934532, 27.932941))
345	7075	G	NG15-02	Garden Banks	44866	0	0	0	0	0	2304	0	0	2304	2304	0	0	1	0	NA	1	44866	0.183481	0.00209766	list(c(-92.758014, -92.758026, -92.764075, -92.770124, -92.776174, -92.782223, -92.788272, -92.794322, -92.800371, -92.80642, -92.806411, -92.806402, -92.806392, -92.806383, -92.806374, -92.806365, -92.806355, -92.806346, -92.800294, -92.794243, -92.788191, -92.782139, -92.776088, -92.770036, -92.763984, -92.757933, -92.757944, -92.757956, -92.757968, -92.757979, -92.757991, -92.758003, -92.75801…
346	6339	G	NG15-01	East Breaks	44866	0	0	0	0	0	2304	0	0	2304	2304	0	0	1	0	NA	1	44866	0.184006	0.00210897	list(c(-94.210767, -94.21685, -94.21691, -94.21697, -94.21703, -94.21709, -94.217151, -94.217211, -94.217271, -94.217331, -94.211245, -94.20516, -94.199074, -94.192989, -94.186903, -94.180817, -94.174732, -94.168646, -94.168588, -94.168531, -94.168473, -94.168415, -94.168358, -94.1683, -94.168242, -94.168185, -94.174268, -94.180351, -94.186434, -94.192518, -94.198601, -94.204684, -94.210767, 27.6…
347	6462	G	NH16-10	Mississippi Canyon	44866	0	0	0	0	0	2304	0	0	2304	2304	0	0	1	0	NA	1	44866	0.184663	0.00212305	list(c(-89.495537, -89.501664, -89.501792, -89.50192, -89.502048, -89.502176, -89.502304, -89.502432, -89.50256, -89.502688, -89.496559, -89.490429, -89.4843, -89.478171, -89.472041, -89.465912, -89.459783, -89.453653, -89.453527, -89.453402, -89.453276, -89.453151, -89.453025, -89.4529, -89.452775, -89.452649, -89.458776, -89.464903, -89.47103, -89.477157, -89.483284, -89.489411, -89.495537, 28.…
348	7110	G	NH15-09	New Orleans	44866	0	0	0	0	0	2304	0	0	2304	2304	0	0	1	0	NA	1	44866	0.185165	0.00213403	list(c(-91.571221, -91.571147, -91.571072, -91.570998, -91.570923, -91.570849, -91.570774, -91.5707, -91.570625, -91.564466, -91.558306, -91.552147, -91.545987, -91.539828, -91.533669, -91.527509, -91.52135, -91.521427, -91.521504, -91.521581, -91.521658, -91.521735, -91.521812, -91.521889, -91.521966, -91.528123, -91.53428, -91.540437, -91.546594, -91.55275, -91.558907, -91.565064, -91.571221, 2…
349	7021	G	NH15-11	Bouma Bank	44866	0	0	0	0	0	2304	0	0	2304	2304	0	0	1	0	NA	1	44866	0.184387	0.00211726	list(c(-92.993891, -92.987782, -92.981673, -92.975564, -92.969455, -92.963345, -92.957236, -92.951127, -92.95113, -92.951132, -92.951135, -92.951137, -92.951139, -92.951142, -92.951144, -92.951147, -92.957253, -92.96336, -92.969467, -92.975573, -92.98168, -92.987787, -92.993893, -93, -93, -93, -93, -93, -93, -93, -93, -93, -92.993891, 28.119138, 28.119137, 28.119137, 28.119136, 28.119134, 28.1191…
350	6237	G	NG14-03	Corpus Christi	44866	0	0	0	0	0	2304	0	0	2304	2304	0	0	1	0	NA	1	44866	0.183928	0.0021071	list(c(-96.224321, -96.224458, -96.230539, -96.23662, -96.242701, -96.248782, -96.254863, -96.260944, -96.267025, -96.273106, -96.272972, -96.272837, -96.272702, -96.272567, -96.272432, -96.272297, -96.272162, -96.272027, -96.265943, -96.259859, -96.253776, -96.247692, -96.241609, -96.235526, -96.229442, -96.223359, -96.223496, -96.223634, -96.223771, -96.223909, -96.224046, -96.224184, -96.22432…
351	6886	G	NH14-12	Beeville	44866	0	0	0	2216.6053229639256	0	2304	74.13843603312235	3	13.256241002996452	2229.861563966922	0	0	1	0	NA	1	44866	0.177663	0.00204752	list(c(-96.26206, -96.262198, -96.268304, -96.274409, -96.280515, -96.28662, -96.292726, -96.298832, -96.304937, -96.311043, -96.310908, -96.310772, -96.310637, -96.310501, -96.310366, -96.31023, -96.310221, -96.30785, -96.305509, -96.303201, -96.300925, -96.297317, -96.291634, -96.285526, -96.279418, -96.27331, -96.267202, -96.261094, -96.261232, -96.26137, -96.261508, -96.261646, -96.261784, -9…
352	6421	G	NH15-12	Ewing Bank	44866	0	0	0	0	0	2304	0	0	2304	2304	0	0	1	0	NA	1	44866	0.184758	0.00212515	list(c(-90.987653, -90.987756, -90.993888, -91.00002, -91.006152, -91.012283, -91.018415, -91.024547, -91.030679, -91.036811, -91.036711, -91.03661, -91.036509, -91.036409, -91.036308, -91.036207, -91.036107, -91.036006, -91.029871, -91.023737, -91.017602, -91.011468, -91.005334, -90.999199, -90.993065, -90.986931, -90.987034, -90.987137, -90.98724, -90.987344, -90.987447, -90.98755, -90.987653, …
353	6023	G	NH15-10	Bay City	44866	0	0	0	1545.3709335377582	0	2304	0	2	758.6290664622419	2304	0	0	1	0	NA	1	44866	0.185082	0.0021322	list(c(-94.963529, -94.969681, -94.969784, -94.969886, -94.969989, -94.970091, -94.970194, -94.970296, -94.970399, -94.970501, -94.964346, -94.958191, -94.952037, -94.945882, -94.939727, -94.933572, -94.927417, -94.921262, -94.921162, -94.921062, -94.920962, -94.920862, -94.920762, -94.920662, -94.920562, -94.920463, -94.926615, -94.932767, -94.93892, -94.945072, -94.951225, -94.957377, -94.96352…
354	6934	G	NG15-03	Green Canyon	44866	0	0	0	0	0	2304	0	0	2304	2304	0	0	1	0	NA	1	44866	0.183423	0.00209622	list(c(-90.43215, -90.426099, -90.420048, -90.413997, -90.407945, -90.401894, -90.395843, -90.389792, -90.383741, -90.383867, -90.383994, -90.38412, -90.384246, -90.384372, -90.384498, -90.384624, -90.38475, -90.390799, -90.396848, -90.402897, -90.408946, -90.414994, -90.421043, -90.427092, -90.433141, -90.433018, -90.432894, -90.43277, -90.432646, -90.432522, -90.432398, -90.432274, -90.43215, 2…
355	6186	G	NH15-11	Bouma Bank	44866	0	0	0	0	0	2304	0	0	2304	2304	0	0	1	0	NA	1	44866	0.185043	0.00213142	list(c(-92.212905, -92.212946, -92.219094, -92.225243, -92.231391, -92.23754, -92.243688, -92.249837, -92.255985, -92.262133, -92.262095, -92.262057, -92.262019, -92.261981, -92.261943, -92.261904, -92.261866, -92.261828, -92.255677, -92.249526, -92.243375, -92.237224, -92.231073, -92.224922, -92.218771, -92.21262, -92.212661, -92.212702, -92.212742, -92.212783, -92.212824, -92.212865, -92.212905…
356	6979	G	NH15-12	Ewing Bank	44866	0	0	0	0	0	2304	0	0	2304	2304	0	0	1	0	NA	1	44866	0.184286	0.00211487	list(c(-90.605968, -90.606088, -90.612191, -90.618293, -90.624396, -90.630499, -90.636601, -90.642704, -90.648807, -90.65491, -90.654792, -90.654674, -90.654556, -90.654438, -90.654321, -90.654203, -90.654085, -90.653967, -90.647862, -90.641756, -90.635651, -90.629546, -90.623441, -90.617336, -90.611231, -90.605126, -90.605246, -90.605366, -90.605487, -90.605607, -90.605727, -90.605848, -90.60596…
357	6719	G	NH15-11	Bouma Bank	44866	0	0	0	0	0	2304	0	0	2304	2304	0	0	1	0	NA	1	44866	0.18462	0.0021223	list(c(-93.091822, -93.097943, -93.097948, -93.097953, -93.097958, -93.097963, -93.097968, -93.097973, -93.097978, -93.097983, -93.091859, -93.085735, -93.079611, -93.073487, -93.067363, -93.061239, -93.055115, -93.048991, -93.048989, -93.048986, -93.048984, -93.048982, -93.048979, -93.048977, -93.048974, -93.048972, -93.055093, -93.061214, -93.067336, -93.073457, -93.079579, -93.0857, -93.091822…
358	6682	G	NG14-03	Corpus Christi	44866	0	0	0	0	0	2304	0	0	2304	2304	0	0	1	0	NA	1	44866	0.183619	0.00210051	list(c(-96.524176, -96.518113, -96.512049, -96.505986, -96.499922, -96.493859, -96.487795, -96.481732, -96.475668, -96.475791, -96.475914, -96.476037, -96.47616, -96.476283, -96.476406, -96.476529, -96.476652, -96.482713, -96.488774, -96.494835, -96.500896, -96.506957, -96.513018, -96.519079, -96.52514, -96.52502, -96.5249, -96.524779, -96.524659, -96.524538, -96.524417, -96.524297, -96.524176, 2…
359	6880	G	NH15-10	Bay City	44866	0	0	0	0	0	2304	0	0	2304	2304	0	0	1	0	NA	1	44866	0.184442	0.00211835	list(c(-94.56495, -94.571062, -94.577173, -94.583284, -94.589395, -94.595506, -94.601617, -94.607728, -94.61384, -94.613921, -94.614002, -94.614084, -94.614165, -94.614247, -94.614328, -94.61441, -94.614491, -94.608378, -94.602264, -94.59615, -94.590037, -94.583923, -94.57781, -94.571696, -94.565582, -94.565503, -94.565424, -94.565345, -94.565266, -94.565187, -94.565108, -94.565029, -94.56495, 28…
360	6829	G	NG15-03	Green Canyon	44866	0	0	0	0	0	2304	0	0	2304	2304	0	0	1	0	NA	1	44866	0.183528	0.00209852	list(c(-90.624777, -90.624892, -90.630947, -90.637002, -90.643056, -90.649111, -90.655166, -90.661221, -90.667276, -90.673331, -90.673218, -90.673106, -90.672993, -90.67288, -90.672768, -90.672655, -90.672542, -90.672429, -90.666372, -90.660315, -90.654257, -90.6482, -90.642143, -90.636086, -90.630029, -90.623972, -90.624087, -90.624202, -90.624317, -90.624432, -90.624547, -90.624662, -90.624777,…
361	6165	G	NH16-10	Mississippi Canyon	44866	0	0	0	98.30477952139489	0	2304	0	2	2205.6952204785707	2303.9999999999654	0	0	1	0	NA	1	44866	0.18492	0.00212862	list(c(-89.354285, -89.360428, -89.36055, -89.360672, -89.360794, -89.360916, -89.361038, -89.36116, -89.361282, -89.361404, -89.355259, -89.349114, -89.342969, -89.336823, -89.330678, -89.324533, -89.318387, -89.312242, -89.312122, -89.312003, -89.311883, -89.311763, -89.311644, -89.311524, -89.311405, -89.311286, -89.317428, -89.323571, -89.329714, -89.335857, -89.342, -89.348142, -89.354285, 2…
362	7069	G	NH15-09	New Orleans	44866	0	0	0	43.30040825416232	0	2304	0	2	2260.699591745838	2304.0000000000005	0	0	1	0	NA	1	44866	0.185169	0.00213405	list(c(-91.077135, -91.077235, -91.077335, -91.077436, -91.077536, -91.077636, -91.077737, -91.077837, -91.077937, -91.084095, -91.090252, -91.09641, -91.102568, -91.108726, -91.114883, -91.121041, -91.127199, -91.127101, -91.127003, -91.126906, -91.126808, -91.12671, -91.126612, -91.126515, -91.126417, -91.120256, -91.114096, -91.107936, -91.101775, -91.095615, -91.089455, -91.083295, -91.077135…
363	6174	G	NG15-01	East Breaks	44866	0	0	0	0	0	2304	0	0	2304	2304	0	0	1	0	NA	1	44866	0.184063	0.00211014	list(c(-94.948993, -94.94909, -94.949186, -94.949283, -94.94938, -94.949477, -94.949573, -94.94967, -94.949767, -94.943677, -94.937587, -94.931496, -94.925406, -94.919316, -94.913226, -94.907135, -94.901045, -94.900951, -94.900856, -94.900762, -94.900667, -94.900573, -94.900479, -94.900385, -94.90029, -94.906378, -94.912466, -94.918554, -94.924642, -94.93073, -94.936818, -94.942905, -94.948993, 2…
364	6453	G	NG15-02	Garden Banks	44866	0	0	0	0	0	2304	0	0	2304	2304	0	0	1	0	NA	1	44866	0.18391	0.00210692	list(c(-93.826522, -93.832599, -93.838676, -93.844753, -93.85083, -93.856907, -93.862983, -93.86906, -93.875137, -93.87518, -93.875223, -93.875266, -93.875309, -93.875352, -93.875395, -93.875438, -93.875481, -93.869402, -93.863322, -93.857243, -93.851164, -93.845085, -93.839006, -93.832926, -93.826847, -93.826807, -93.826766, -93.826725, -93.826685, -93.826644, -93.826604, -93.826563, -93.826522,…
365	6058	G	NH15-12	Ewing Bank	44866	0	0	0	0	0	2304	0	0	2304	2304	0	0	1	0	NA	1	44866	0.185092	0.00213245	list(c(-91.621624, -91.627776, -91.633928, -91.64008, -91.646232, -91.652384, -91.658537, -91.664689, -91.670841, -91.670772, -91.670703, -91.670634, -91.670565, -91.670496, -91.670427, -91.670358, -91.670288, -91.664134, -91.657979, -91.651824, -91.64567, -91.639515, -91.633361, -91.627206, -91.621051, -91.621123, -91.621195, -91.621266, -91.621338, -91.62141, -91.621481, -91.621553, -91.621624,…
366	6366	G	NH15-10	Bay City	44866	0	0	0	0	0	2304	0	0	2304	2304	0	0	1	0	NA	1	44866	0.184767	0.0021253	list(c(-95.301348, -95.307481, -95.307599, -95.307718, -95.307836, -95.307955, -95.308073, -95.308192, -95.30831, -95.308429, -95.302294, -95.296158, -95.290023, -95.283887, -95.277752, -95.271616, -95.265481, -95.259345, -95.259229, -95.259113, -95.258997, -95.258881, -95.258765, -95.258649, -95.258533, -95.258417, -95.26455, -95.270683, -95.276816, -95.282949, -95.289082, -95.295215, -95.301348…
367	6705	G	NH15-09	New Orleans	44866	0	0	0	2223.526807917201	0	2304	0	2	80.47319208279977	2304.000000000001	0	0	1	0	NA	1	44866	0.185509	0.00214147	list(c(-91.764047, -91.764112, -91.77029, -91.776468, -91.782647, -91.788825, -91.795003, -91.801182, -91.80736, -91.813538, -91.813476, -91.813413, -91.81335, -91.813288, -91.813225, -91.813162, -91.813099, -91.813036, -91.806855, -91.800674, -91.794494, -91.788313, -91.782132, -91.775951, -91.76977, -91.763589, -91.763654, -91.76372, -91.763785, -91.763851, -91.763916, -91.763981, -91.764047, 2…
[truncated: 8,840 more rows]

## Sheet: Table 6 Gas composition
	STATE	COUNTY	ch4_weighted_avg	co2_emissions_subpart_c	C1_fraction	remaining_comps_ghgrp	HE_fraction	CO2_fraction	H2_fraction	N2_fraction	O2_fraction	C2_fraction	C3_fraction	N-C4_fraction	I-C4_fraction	N-C5_fraction	I-C5_fraction	C6+_fraction	BASIN_NAME_x	BASIN_NAME_y
[truncated: 142 more rows]

[truncated: 19 more sheets: Table 7 basin CH4 loss rate, Table 8 Elec Mix, Table 9 field flare, Table 10 basin characteristics, Table 11 field CH4 loss rate, Table 12 Gas fields, Table 13 Oil fields, Table 14 Offshore fields, Table 15 County-proc, Table 16 Leontief Proc-Dlvry, Table 17 Proc Centroid, Table 18 Delivery Centroid, Table 19 Midstream matrix, Table 20 Midstream for Prod, Table 21 Midstream for Dlvry, Table 22 Field-level CI, Table 23 Top 15 basin CI, Table 24 Basin-level CI, Table 25 Mitigation scenario]
