# Supplementary material for: High-Resolution Carbon Intensity of United States Natural Gas Supply
Source: Research Square preprint supplement (doi:10.21203/rs.3.rs-5776078/v1), 2025-04-10
Supplement: Supplementary file 2 [file fb2125c504275ec6b31bc1d7.docx]

Supplementary Information for:

High-Resolution Carbon Intensity of United States Natural Gas Supply

Zhihao (Spencer) Zhang, Jeffery S. Rutherford, James Littlefield, Farah Ramadan, Mohamed Ali Saafi, Bo Ren, Muhammad Y Jabbar, Mohammad S. Masnadi, Adam Brandt

Total supplementary texts

- **SI method details and additional results (current document)**

Other supplementary files

- Extended Data (Excel file)
- US oil and gas production area map geographical database (shp file)

Table of Contents

[1. Material and Methods 5](#_Toc186722026)

[1.1. Public and commercial data sources 5](#_Toc186722027)

[1.1.1. Well and Production Dataset 5](#_Toc186722028)

[1.1.2. Flaring Dataset 6](#_Toc186722029)

[1.1.3. Gas Composition Dataset 6](#_Toc186722030)

[1.1.4. The Synthesized OPGEE Field Input 7](#_Toc186722031)

[1.2. Classification of well production types 7](#_Toc186722032)

[1.3. Creation of the US oil and gas production area map 7](#_Toc186722033)

[1.4. Integrating the aerial methane loss rates 8](#_Toc186722034)

[1.4.1. Matching the loss rates to all AAPG basins 8](#_Toc186722035)

[1.4.2. Integrating the methane loss rates in the OPGEE model 12](#_Toc186722036)

[1.5. LCA-related assumptions and definitions 13](#_Toc186722037)

[1.5.1. System boundaries 13](#_Toc186722038)

[1.5.2. Emission Allocation between coproducts 13](#_Toc186722039)

[1.5.3. The electricity mix 14](#_Toc186722040)

[2. Integrating the midstream transmission carbon intensity 15](#_Toc186722041)

[2.1. US average midstream transmission emission intensity 16](#_Toc186722042)

[2.1.1. Midstream combustion emissions and facility inventory 16](#_Toc186722043)

[2.1.2. Midstream venting and fugitive emissions 19](#_Toc186722044)

[2.1.3. Natural gas throughput 20](#_Toc186722045)

[2.1.4. Midstream emission intensity summary 20](#_Toc186722046)

[2.2. The natural gas percentage contribution matrix from the production field to the processing plant 22](#_Toc186722047)

[2.3. The natural gas percentage contribution matrix from processing state to delivery state 23](#_Toc186722048)

[2.4. The state processing and delivery centroid for natural gas traveled distance estimation 24](#_Toc186722049)

[2.5. Connecting the moving pieces 24](#_Toc186722050)

[3. GHG mitigation scenarios 26](#_Toc186722051)

[3.1. “No routine flaring” scenario 26](#_Toc186722052)

[3.2. “Minimal VF” scenario 27](#_Toc186722053)

[3.3. “No routine flaring & Minimal VF” scenario 27](#_Toc186722054)

[3.4. “Current” scenario 27](#_Toc186722055)

[4. Calculating the total GHG emissions 27](#_Toc186722056)

[5. Additional Results 28](#_Toc186722057)

[5.1. Process breakdown of the upstream GHG emissions 28](#_Toc186722058)

[5.2. A detailed look at the fields in the highest 5-percentiles for upstream CIs 30](#_Toc186722059)

[5.3. Midstream GHG emission from production and delivery perspectives 34](#_Toc186722060)

[5.4. Uncertainties of the aerial measurement-based methane venting and fugitive loss rates 37](#_Toc186722061)

[5.5. GHG mitigation – Case Studies 38](#_Toc186722062)

[6. Validation 39](#_Toc186722063)

[7. Abbreviation and nomenclature 1](#_Toc186722064)

[8. References 2](#_Toc186722065)

**List of figures:**

[Figure 1 The emission allocation scheme between coproducts for each unit process in upstream activities in OPGEE. 14](#_Toc181957032)

[Figure 2 The natural gas flows from production fields to processing plants and to delivery states. 24](#_Toc181957033)

[Figure 3 The process breakdown for the field-level upstream carbon intensity curve. 28](#_Toc181957034)

[Figure 4 The field-level upstream carbon intensity supply curve for US natural gas in 2022 (a) and zoomed-in version for the fields with CIs in the highest 10 percentile (b). 30](#_Toc181957035)

[Figure 5 The field-level upstream carbon intensity and non-combustion methane loss rates (indicated by color) for US natural gas in 2022. 32](#_Toc181957036)

[Figure 6 The state-level production-delivery midstream carbon intensity matrix. 36](#_Toc181957037)

[Figure 7 The field-level upstream CI curves for the US natural gas under different mitigation scenarios. 38](#_Toc181957038)

**List of tables:**

[Table 1 The basin-level non-combustion methane fractional loss rates for the six surveyed basins in the US from Sherwin et al.11 8](#_Toc181956642)

[Table 2 The basin- level characteristics and matched methane fractional loss. 9](#_Toc181956643)

[Table 3 The US electricity generation by source for the year 2022. Data source: US Energy Information Administration, Monthly Energy Review and Electric Power Monthly, February 2024, preliminary data for 2023.16 14](#_Toc181956644)

[Table 4 Activity factors for transmission and storage compression energy (representative of 2017 GHGRP data) 16](#_Toc181956645)

[Table 5 Greenhouse gas emission factors for transmission and storage compressor drivers 17](#_Toc181956646)

[Table 6 Prime mover thermal efficiencies. 17](#_Toc181956647)

[Table 7 Transmission facility compression energy intensity. 18](#_Toc181956648)

[Table 8 Venting and fugitive emissions from natural gas transmission and storage stations. 19](#_Toc181956649)

[Table 9 Midstream venting and fugitives emission intensity summary 20](#_Toc181956650)

[Table 10 Midstream combustion emission intensity summary 21](#_Toc181956651)

[Table 11 The midstream CIs for natural gas produced in each state or region in the US for 2022, sorted by CI from high to low. 33](#_Toc181956652)

[Table 12 The midstream CIs for natural gas consumed in each state in the US for 2022, sorted by CI from high to low. 34](#_Toc181956653)

[Table 13 Summary of recent GHG emission LCA studies for the oil and natural gas supply chains and comparison with the current study, ordered firstly by category (“natural gas,” “O & NG,” and “Oil”) and secondly by publication date from recent to previous. 1](#_Toc181956654)

# Material and Methods

# Public and commercial data sources

## Well and Production Dataset

Well-level production data were downloaded from the Enverus “DrillingInfo” web application on July 13, 2023. The "Wells" dataset was filtered for wells with "Monthly Production Date" between January 1, 2022, and December 31, 2022. Both "Well Headers" and "Well Monthly Production" datasets are exported. The "Well Headers" dataset contained well characteristic information such as well name, location, API14 identifier (ID), well production status, well age, well depth, production type ("OIL," "GAS," and "O&G"), etc. The "Well Monthly Production" dataset contained well-level monthly production data for oil, gas, and water and the well-specific gas-oil ratios (GOR), uniquely identified with API14 IDs. We filtered the “Well Headers” dataset for wells whose "Well Status" is active, i.e., actively producing for 2022. The annual production volume for oil and gas was calculated by summarizing the monthly production data from "Well Monthly Production." We obtained the complete well information with 2022 production data by joining the "Well Header" with the annual production data by each well's API14 ID.

Production data for Kansas and Michigan is unavailable from the Enverus dataset for the year 2022. The county-level monthly production data for Kansas was downloaded from the Kansas Geological Survey hosted by the University of Kansas on September 24, 2023, at <https://chasm.kgs.ku.edu/ords/oil.ogop5.FileOpYear>, shown in Extended Data Table 1.1 The county-level dataset contains well count and oil and gas production volume. Michigan's well and monthly production data were downloaded from Michigan Department of Environment, Great Lakes, and Energy on September 24, 2023, at <https://www.egle.state.mi.us/dataminer/>, shown in Extended Data Table 2 and 3.2

The offshore Gulf of Mexico (GOM) active well and production data were included in the Enverus dataset. However, we need an outer boundary to conduct the Voronoi diagram algorithm (as described in Main 3.4) to create the GOM oil and gas production area shapefile in order to merge other geographical information, such as the satellite observed flaring activities. Therefore, we downloaded the GOM Federal lease block geographical information from the Bureau of Ocean Energy Management (BOEM) on May 6, 2024, at <https://www.data.boem.gov/Main/Mapping.aspx#ascii>, shown in Extended Data Table 5.3

## Flaring Dataset

The point-source flaring dataset was downloaded from the Earth Observation Group at <https://eogdata.mines.edu/products/vnf/global_gas_flare.html#data_download> on July 10, 2023, shown in Extended Data Table 4.4–6 There were 2,866 flaring events observed in the United States in 2022. The total flared gas volume was 7.88 BCM in the US in 2022, contributing 5.8% of the global flared volume. The US was the sixth largest flaring country in 2022. If these figures are accurate, about 1% of produced natural gas was wasted through flaring activities in the US in 2022. The satellite-observed flaring dataset provided coordinates at which the flaring activities were observed. We map the point-source flaring volume to a specific oil or gas production area created as described in Main 3.4. The flare volume is allocated to which production area the flare point falls into using the sf geographical package in R, shown in Main Figure 1. The production area-specific flare volumes are shown in Extended Data Table 9. While there is uncertainty in the geolocation of flares from space, we treat the flare location given in the dataset as a point value with no uncertainty (essentially assuming that location is unbiased, though noisy, across many flares). This is a reasonable assumption because we are assigning flares to broad regions (e.g., oil and gas regions) rather than individual wells.

## Gas Composition Dataset

The county-level gas composition dataset (Extended Data Table 6) was provided courtesy of Philippine Burdeau et al. on November 6, 2023.7 The dataset contains gas composition (volumetric percentages) for CH4, C2, C3, C4+ hydrocarbons, N2, and CO2. The dataset includes natural gas produced in 141 counties in the US, covering 57% of the total gas production volume discussed in the study. We map the gas composition data to each gas production area based on the county where the area is located. For counties where the gas composition data is not available, we use the smart default values from OPGEE v.3.0c (89.18% CH4, 5.30% C2, 1.62% C3, 0.71% C4+ hydrocarbons, 2.86% N2, and 0.33% CO2).

## The Synthesized OPGEE Field Input

We run each oil or gas production area created in Main 3.4 as a “field” in OPGEE. A field is the smallest entity for which OPGEE evaluates carbon intensity (CI). The input required for OPGEE to evaluate upstream CI includes but is not limited to oil, gas, water production volumes, GOR, well age, well depth, flare-to-oil ratios (FOR), process methane loss rates, etc. Using the oil and gas production area map created in Main 3.4, we map the other required input to each production area based on coordinates or the located county. The summarized input for all fields evaluated in OPGEE is shown in Extended Data Table 12-14.

# Classification of well production types

We acquired 927,513 active producing wells from Enverus and other relevant datasets.1,2,8 Among them, 90.4% of the wells were pre-classified as gas-producing or oil-producing wells in the Enverus dataset, indicated by the column "Production Type." We classified the remaining wells as gas- or oil-producing based on the provided GOR or annual gas and oil production volume split. If the GOR is not provided, we estimate GOR with the ratio of its annual gas production to oil production. If the supplied or estimated GOR exceeds 10,000 scf gas per bbl of crude oil produced, we classified the well as a gas-producing well. Otherwise, we classify it as an oil-producing well.

# Creation of the US oil and gas production area map

We leveraged the geographical information in the well production datasets to create oil and gas production areas in the US to run as individual "fields" in the OPGEE model to obtain upstream CI estimation. The well production dataset from Enverus contains "Surface Latitude" and "Surface Longitude" columns. The other public production datasets also contain similar geographical information. We imported the US county shapefiles using the census R package “tigris.”9

Using the "sf" R package10, we overlaid the well points on top of the county shapefile. We used the "st_voronoi" function in the “sf” package to divide each county shapefile into multiple non-overlapping areas, where each area contains only one active producing well, and the union of the divided areas covers the entire county shapefile. We merged the areas containing active gas wells in the same county as a gas production area (not always contiguous), and the areas containing active oil wells as an oil production area (also not always contiguous). In other words, each well-containing county would have either one gas production area encompassing the entire county, or an oil production area encompassing the entire county, or one gas and one oil production area which sum to encompass the entire county. Each county would have at maximum two production areas. In summary, there were 773 active producing counties in the US in 2022, resulting in 623 gas production areas and 739 oil production areas.

# Integrating the aerial methane loss rates

## Matching the loss rates to all AAPG basins

To account for the non-combustion methane emissions during natural gas upstream (exploration, drilling & development, production, processing, see Main 3.1 for system boundary) activities, we leveraged Sherwin et al.'s state-of-the-art methane emission loss rates.11 Sherwin et al. used data from hyperspectral infrared surveys performed by Carbon Mapper and Insight M (formerly Kairos Aerospace). These surveys captured nearly one million well pads overflights in six representative US American Association of Petroleum Geologists (AAPG) basins. These surveys occurred over weeks to one year in length. Sherwin et al. integrated the aerial results with the component-level emission simulation model empirically generated from ground measurements developed by Rutherford et al. The result is a set of basin-level methane fractional loss rates representative of the methane venting and fugitive activities happening at the wellsite as well as non-wellsite facilities such as compressor stations, gas processing plants, and pipelines. The resulting basin-level methane fractional loss rates are shown in Table 1.

Table 1 The basin-level non-combustion methane fractional loss rates for the six surveyed basins in the US from Sherwin et al.11

| AAPG Basin Name | AAPG code | Annual oil production [BBL/year] | Annual gas production [MSCF/year] | Wellsite methane loss rate (%) | Non-wellsite methane loss rate (%) |
| --- | --- | --- | --- | --- | --- |
| Permian | 430 | 1.92E+09 | 7.62E+09 | 3.25  (3.12, 3.37) | 2.67  (2.57, 2.78) |
| San Joaquin | 745 | 3.82E+07 | 9.76E+07 | 2.08  (1.72, 2.43) | 2.08  (1.92, 2.24) |
| Denver-Julesburg | 540 | 1.57E+08 | 1.06E+09 | 0.73  (0.66, 0.79) | 0.39  (0.35, 0.43) |
| Pennsylvania | 160 | 3.52E+07 | 1.07E+10 | 0.49  (0.44, 0.54) | 0.25  (0.22, 0.27) |
| Uinta | 575 | 1.05E+07 | 1.12E+08 | 4.68  (4.33, 5.01) | 1.06  (0.98, 1.13) |
| Fort Worth | 420 | 2.32E+07 | 8.80E+08 | 3.05  (2.72, 3.37) | 1.60  (1.43,1.77) |

The six basins cover more than half of the natural gas production in this study.

To assess the remaining basins that were not directly estimated in Sherwin et al., we matched the available loss rates to the remaining basins. We matched unsurveyed basins to surveyed basins using how similar they are to the six surveyed basins, using the cosine similarity of the basin characteristic vector (described in Main 3.5). The similarity vector is constructed by normalizing well counts, well age, annual gas production, annual oil production, and GOR. We match the unsurveyed basin to one of the six surveyed basins by their cosine distance, as shown in Equation (1):

where ***v*** is the unsurveyed basin’s characteristic vector and ***w[k]*** is one of the six surveyed basins’ characteristic vectors, and ***v****i* or ***w[k]****i* is one element in the characteristic vector. The cosine value of the two vectors indicates how similar they are. The higher the value, the higher the similarity of the two basins’ characteristics. We use the loss rate of the basin among the six surveyed basins which has the largest similarity vector cosine value.

The complete AAPG basin-level methane loss rate lookup table (surveyed and matched) is shown in Table 2.

Table 2 The basin- level characteristics and matched methane fractional loss.

| AAPG Basin | Well Count | Annual Gas Production [MSCF/year] | Annual Oil Production [BBL/year] | Gas-Oil Ratio | Well Age [day] | Matched Basin | Wellsite Methane Loss Rate (%) | Non-wellsite Methane Loss Rate (%) |
| --- | --- | --- | --- | --- | --- | --- | --- | --- |
| APPALACHIAN | 204055 | 10930678939 | 51486839 | 212300 | 9511 | APPALACHIAN | 0.39 | 0.07 |
| PERMIAN BASIN | 184514 | 7622643101 | 1924577222 | 3961 | 8835 | PERMIAN BASIN | 2.51 | 2.26 |
| ARKLA BASIN | 30821 | 3864296023 | 11380882 | 339543 | 11296 | APPALACHIAN | 0.39 | 0.07 |
| ARCTIC OCEAN, FED. | 2487 | 3319977563 | 145071942 | 22885 | 8060 | FT WORTH BASIN | 2.36 | 0.42 |
| TEXAS & LOUISIANA GULF COAST BASIN | 78891 | 2967098461 | 446667991 | 6643 | 7857 | DENVER JULESBURG | 0.11 | 0.09 |
| ANADARKO BASIN | 70204 | 2279859802 | 120560231 | 18911 | 10819 | FT WORTH BASIN | 2.36 | 0.42 |
| EAST TEXAS BASIN | 35958 | 2063915792 | 17494992 | 117972 | 10193 | APPALACHIAN | 0.39 | 0.07 |
| WILLISTON | 25776 | 1092389495 | 399111061 | 2737 | 5108 | SAN JOAQUIN BASIN | 1.22 | 1.68 |
| DENVER JULESBURG | 19629 | 1055971950 | 158320714 | 6670 | 5557 | DENVER JULESBURG | 0.11 | 0.09 |
| FT WORTH BASIN | 46354 | 882761605 | 24434740 | 36127 | 11468 | FT WORTH BASIN | 2.36 | 0.42 |
| GREEN RIVER | 11608 | 880110730 | 7779209 | 113136 | 6857 | APPALACHIAN | 0.39 | 0.07 |
| ARKOMA BASIN | 17237 | 717803593 | 3604457 | 199143 | 8530 | APPALACHIAN | 0.39 | 0.07 |
| PICEANCE | 16076 | 466418099 | 4053315 | 115071 | 6511 | APPALACHIAN | 0.39 | 0.07 |
| SOUTH OKLAHOMA FOLDED BELT | 12593 | 364628361 | 27664950 | 13180 | 13657 | UINTA | 1.67 | 0.67 |
| SAN JUAN | 19707 | 361621200 | 10209429 | 35420 | 14936 | FT WORTH BASIN | 2.36 | 0.42 |
| CHAUTAUQUA PLATFORM | 21882 | 225420791 | 22133718 | 10184 | 12885 | UINTA | 1.67 | 0.67 |
| POWDER RIVER | 5691 | 206662842 | 59771600 | 3458 | 9338 | PERMIAN BASIN | 2.51 | 2.26 |
| PARADOX | 1027 | 176948826 | 3118621 | 56739 | 13931 | FT WORTH BASIN | 2.36 | 0.42 |
| UINTA | 6948 | 112382002 | 10499218 | 10704 | 7531 | UINTA | 1.67 | 0.67 |
| SAN JOAQUIN BASIN | 14923 | 97819799 | 38171539 | 2563 | 7936 | SAN JOAQUIN BASIN | 1.22 | 1.68 |
| WIND RIVER | 2865 | 97213212 | 6441604 | 15091 | 12215 | UINTA | 1.67 | 0.67 |
| COOK INLET BASIN | 226 | 52625399 | 869256 | 60541 | 6137 | FT WORTH BASIN | 2.36 | 0.42 |
| CENTRAL WESTERN OVERTHRUST | 1612 | 51021363 | 428305 | 119124 | 9965 | APPALACHIAN | 0.39 | 0.07 |
| MISSISSIPPI & ALABAMA GULF COAST BASIN | 3342 | 40185503 | 16413146 | 2448 | 9274 | SAN JOAQUIN BASIN | 1.22 | 1.68 |
| OUACHITA FOLDED BELT | 2990 | 30705955 | 2391403 | 12840 | 12991 | UINTA | 1.67 | 0.67 |
| BRAVO DOME | 304 | 28678301 | 0 | 94336516 | 7933 | APPALACHIAN | 0.39 | 0.07 |
| SEDGWICK BASIN | 4426 | 23670682 | 2842794 | 8327 | - | UINTA | 1.67 | 0.67 |
| CHEROKEE BASIN | 14873 | 12081939 | 16268359 | 743 | - | SAN JOAQUIN BASIN | 1.22 | 1.68 |
| SACRAMENTO BASIN | 736 | 9869233 | 26589 | 371177 | 9479 | APPALACHIAN | 0.39 | 0.07 |
| BIG HORN | 2774 | 9002941 | 8283635 | 1087 | 14346 | SAN JOAQUIN BASIN | 1.22 | 1.68 |
| LAS ANIMAS ARCH | 1255 | 7808683 | 1786418 | 4371 | 11560 | PERMIAN BASIN | 2.51 | 2.26 |
| LOS ANGELES BASIN | 2844 | 6489949 | 13057744 | 497 | 13101 | SAN JOAQUIN BASIN | 1.22 | 1.68 |
| SWEET GRASS ARCH | 3244 | 6240150 | 587334 | 10625 | 12960 | UINTA | 1.67 | 0.67 |
| BLACK WARRIOR BASIN | 397 | 5062453 | 123304 | 41057 | 11941 | FT WORTH BASIN | 2.36 | 0.42 |
| VENTURA BASIN | 1480 | 5007992 | 4867628 | 1029 | 14375 | SAN JOAQUIN BASIN | 1.22 | 1.68 |
| RATON | 266 | 4925995 | 0 | 18518778 | 7352 | APPALACHIAN | 0.39 | 0.07 |
| CENTRAL MONTANA UPLIFT | 780 | 3082037 | 518029 | 5950 | 11258 | DENVER JULESBURG | 0.11 | 0.09 |
| CINCINNATI ARCH | 1035 | 1976297 | 2287872 | 864 | 6708 | SAN JOAQUIN BASIN | 1.22 | 1.68 |
| CENTRAL KANSAS UPLIFT | 12765 | 1962710 | 10679290 | 184 | - | SAN JOAQUIN BASIN | 1.22 | 1.68 |
| PALO DURO BASIN | 1831 | 1765038 | 2197627 | 803 | 11750 | SAN JOAQUIN BASIN | 1.22 | 1.68 |
| SANTA MARIA BASIN | 574 | 1199928 | 1602791 | 749 | 14563 | SAN JOAQUIN BASIN | 1.22 | 1.68 |
| NORTH PARK | 174 | 1106803 | 1075901 | 1029 | 9459 | SAN JOAQUIN BASIN | 1.22 | 1.68 |
| ILLINOIS BASIN | 1930 | 776929 | 1176636 | 660 | 6961 | SAN JOAQUIN BASIN | 1.22 | 1.68 |
| EEL RIVER BASIN | 25 | 297133 | 0 | 11885320 | 14175 | FT WORTH BASIN | 2.36 | 0.42 |
| SALINAS BASIN | 87 | 102082 | 789014 | 129 | 10151 | SAN JOAQUIN BASIN | 1.22 | 1.68 |
| MICHIGAN BASIN | 16782 | 95752 | 66978831 | 1 | 3114 | SAN JOAQUIN BASIN | 1.22 | 1.68 |
| FOREST CITY BASIN | 10620 | 54026 | 1953165 | 28 | 5820 | SAN JOAQUIN BASIN | 1.22 | 1.68 |
| NORTHERN COAST PRVC | 12 | 12356 | 13505 | 915 | 9823 | SAN JOAQUIN BASIN | 1.22 | 1.68 |
| NEMAHA ANTICLINE | 2347 | 2474 | 1364996 | 2 | - | SAN JOAQUIN BASIN | 1.22 | 1.68 |
| GREAT BASIN | 56 | 86 | 179817 | 0 | 13502 | SAN JOAQUIN BASIN | 1.22 | 1.68 |
| HALF MOON BASIN | 2 | 2 | 60 | 33 | 15887 | SAN JOAQUIN BASIN | 1.22 | 1.68 |
| IMPERIAL VALLEY BASIN | 3 | 0 | 0 | 0 | - | PERMIAN BASIN | 2.51 | 2.26 |
| PEDERNAL UPLIFT | 2 | 0 | 0 | 0 | - | PERMIAN BASIN | 2.51 | 2.26 |
| SONOMA BASIN | 3 | 0 | 0 | 0 | - | PERMIAN BASIN | 2.51 | 2.26 |
| TUCUMCARI BASIN | 2 | 0 | 0 | 0 | - | PERMIAN BASIN | 2.51 | 2.26 |
| BLACK MESA | 12 | 0 | 0 | 0 | 18480 | SAN JOAQUIN BASIN | 1.22 | 1.68 |
| CHADRON ARCH | 1022 | 0 | 1271642 | 0 | 9495 | SAN JOAQUIN BASIN | 1.22 | 1.68 |
| SALINA BASIN | 296 | 0 | 348544 | 0 | 6526 | SAN JOAQUIN BASIN | 1.22 | 1.68 |
| WASATCH UPLIFT | 12 | 0 | 336108 | 0 | 3126 | SAN JOAQUIN BASIN | 1.22 | 1.68 |

## Integrating the methane loss rates in the OPGEE model

OPGEE includes all emissions from production operations required to produce and transport crude hydrocarbons and natural gas. OPGEE models such operations modularly, breaking down the chemical substances as water, gas, and oil streams and modeling each operation in a separate unit. In other words, we are able to monitor how much water, gases, oil, energy (electricity, diesel, natural gas, etc.), and GHG emissions are coming in and out of one process before entering the next one and how much of that gas would be lost during one process due to venting and fugitives given the process-level fractional methane loss rates we provided.

The top-down fractional methane loss rates from Sherwin et al. are regional estimates and cannot pinpoint the component-level emission source (e.g. equipment pieces). Therefore, we applied the wellsite methane loss rates at the earliest aboveground step, "Separator" in OPGEE, and the non-wellsite loss rates at the "Gas Gathering" step. This doesn't imply the production fugitives are all lost during separation, but this is instead an estimated aggregate of the fugitives from separation until the gas enters gas-gathering pipelines. Because the Sherwin et al. estimates include “bottom-up” estimates derived from Rutherford et al., similar to those contained in default OPGEE methane emissions, we remove the default OPGEE methane emissions estimates in favor of those from Sherwin et al. to prevent double counting.

The methane fractional loss rate for the offshore Gulf of Mexico is 2.9% ([2.2%, 3.8%] confidence interval) from the literature, directly estimated using a large number of aircraft flights.13 Thus, we do not require a cosine similarity approach for the Gulf of Mexico.

# LCA-related assumptions and definitions

## System boundaries

The system boundary of the study is well-through-transmission for US natural gas produced in 2022. The life cycle GHG emissions are stratified into two segments: upstream (exploration to after processing plant) and midstream (transmission and storage stations). The upstream GHG emission is evaluated in the LCA model OPGEE (see Main 3.2). The midstream emission is evaluated using Leontief input-output model and an emission intensity that is a composite of venting and fugitive emissions from previous emission measurement campaign14 and emission factor for fuel combustion in engines and turbines used to drive the compressors.

The fractional methane loss rates derived from Sherwin et al.11 work were stratified into two sections (“wellsite” and “midstream”) in the original work, where “wellsite” covers the production facilities and “midstream” covers the compressor stations, gas processing plants, and pipelines. To avoid confusion with our definition of midstream (post-processing transmission and storage stations), we refer to Sherwin et al.’s “wellsite” and “midstream” methane loss rates as “wellsite” and “non-wellsite” methane loss rates.

## Emission Allocation between coproducts

Petroleum basins generally produce both oil and natural gas products. For example, in the Permian Basin and most of the Eagle Ford, production wellpads will produce nearly equal amounts of oil and gas in energy terms. But basins differ widely in the respective shares of oil and natural gas produced, with some being very gas-rich and others being very oil-rich. Emissions from certain hydrocarbon supply chain segments can be assigned unambiguously to gas or crude production. However, certain elements remain ambiguous.

The bottom-up design of OPGEE allows us to follow ISO 14041 recommendations and subdivide the O&NG production process to the greatest extent possible. Thus, the carbon intensity for the natural gas product from an O&NG production operation can be defined as a summation of sub-processes:

Where,

Where *ki* is the emission allocation factor for the evaluated process (shown in Figure S1) and *EMi* is the total emissions from sub-process *i* [gCO2eq/d], *Egas* is the energy content of processed gas [MJ/d], *Eliq* is the energy content of crude oil sent to refineries and natural gas liquids produced from the demethanizer and exported [MJ/d], and *Eother* is the energy content of net electricity exports [MJ/d].


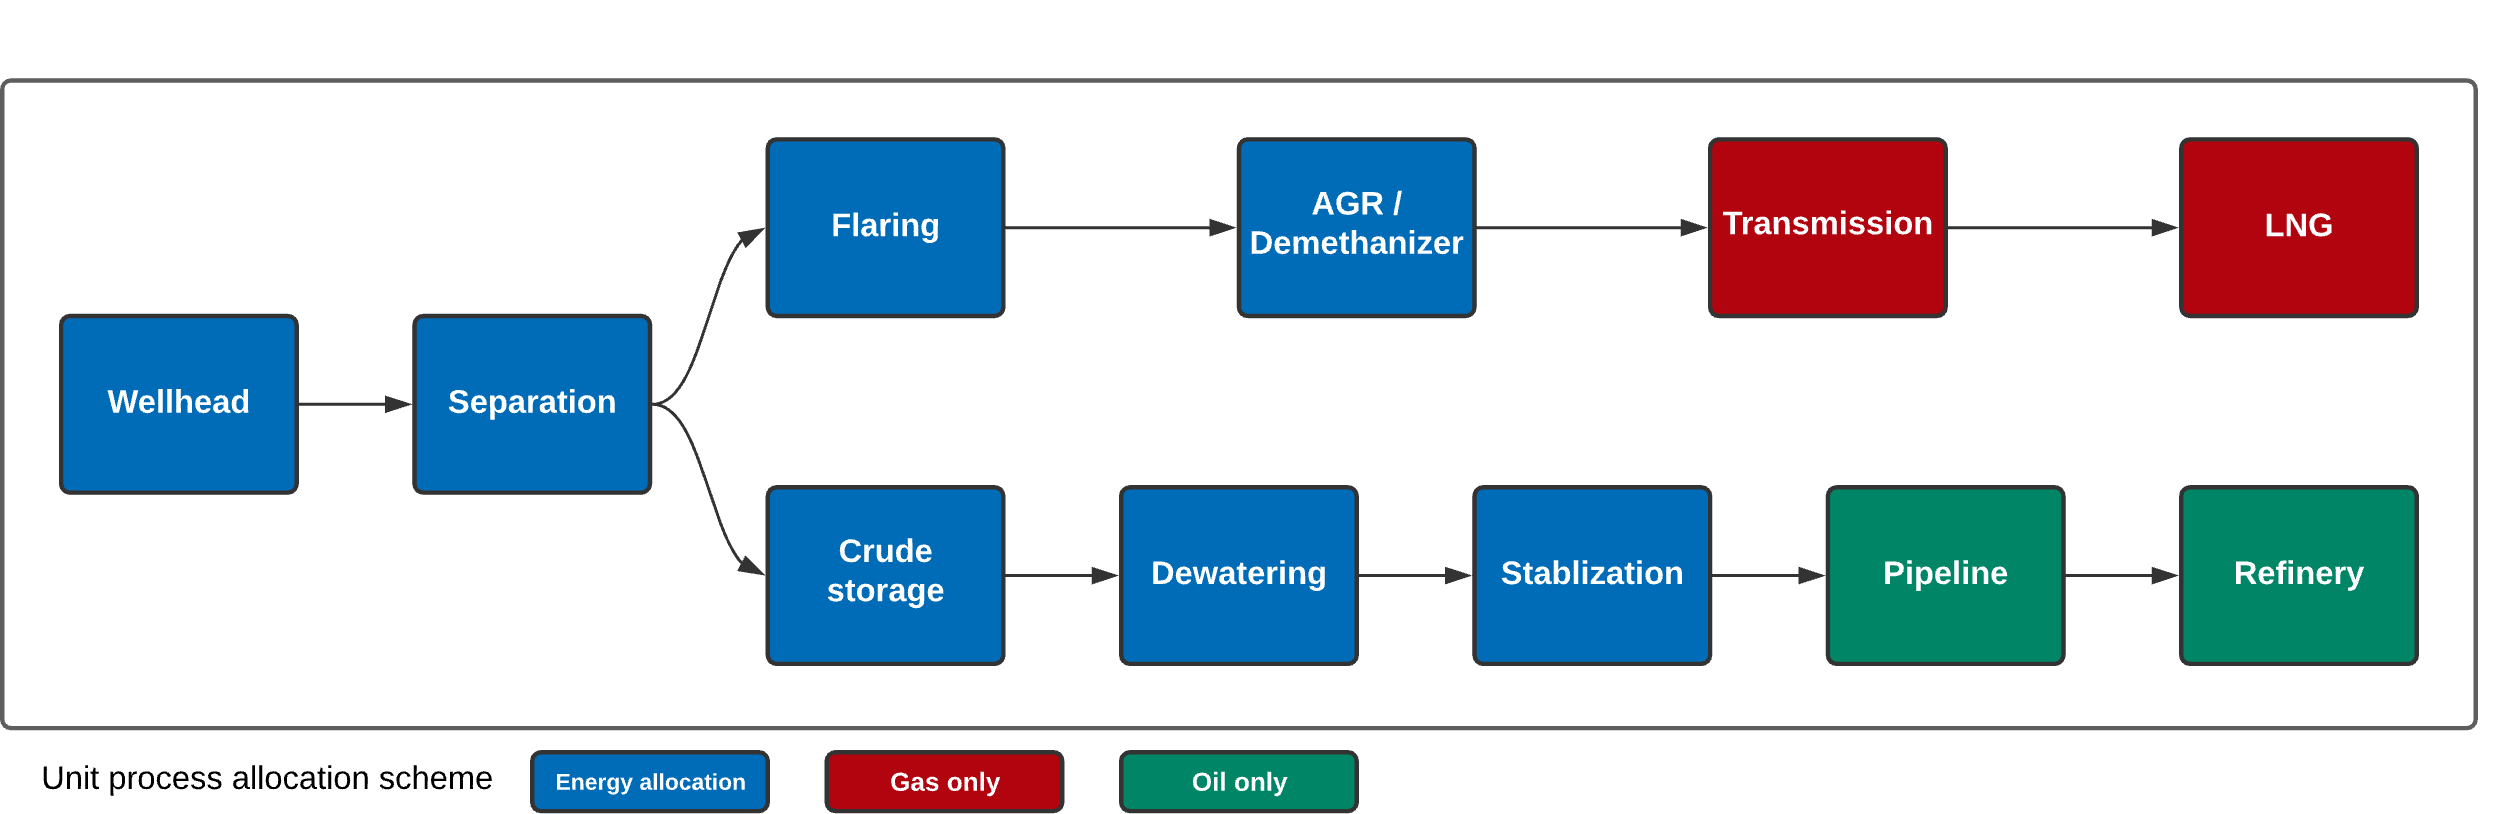


Figure 1 The emission allocation scheme between coproducts for each unit process in upstream activities in OPGEE.

## The electricity mix

OPGEE models the onsite energy usage in the upstream production fields and the related GHG emissions. The onsite energy usage breaks down into two components: (1) onsite electricity generation using 100% natural gas and (2) purchased electricity. We assume the energy sources for the purchased electricity are the same as the US average electricity grid mix. The OPGEE electricity mix is updated to follow the US electricity grid mix in the year 2022.15 The grid mix data is presented in Table 3.

Table 3 The US electricity generation by source for the year 2022. Data source: US Energy Information Administration, Monthly Energy Review and Electric Power Monthly, February 2024, preliminary data for 2023.16

| Source | Electricity Generation  (billion kilowatt-hours) | Electricity Generation Contribution |
| --- | --- | --- |
| Coal | 832 | 19.7% |
| Natural gas | 1687 | 39.9% |
| Nuclear | 772 | 18.2% |
| Petroleum and other | 40 | 0.9% |
| Hydroelectric | 255 | 6.0% |
| Biomass | 52 | 1.2% |
| Geothermal | 16 | 0.4% |
| Wind | 434 | 10.3% |
| Solar | 144 | 3.4% |

# Integrating the midstream transmission carbon intensity

There are four components in our method to estimate the CI associated with midstream transmission for natural gas in the US:

(1) a US average volume- and distance-based emission intensity in the unit of kgCO2eq per MMCF natural gas delivered per km traveled. The relevant distance is the distance from the processing plant state to the delivery state. The emissions factor is derived based on methane emission measurements14 and equipment and pipeline inventory;

(2) a percentage contribution matrix showing the natural gas flow from any production county to a processing plant, derived based on a distance optimization algorithm;

(3) an interstate natural gas percentage contribution matrix showing the natural gas flow from a processing state to a delivery state, derived based on previous gas transmission data;

(4) the synthesized state natural gas processing and delivery centroids to estimate the total distance traveled by the natural gas flow both interstate and intrastate.

## US average midstream transmission emission intensity

We derive the midstream emission intensity by translating emission data from an inventory perspective (i.e., total emissions from the transmission and storage sector) to an intensity perspective (i.e., the emissions per unit of delivered natural gas). Most of the CH4 emission data used in estimating the midstream emission intensity are from Zimmerle et al.14, hereafter referred to as “Zimmerle.”

To convert the emission measurement from the inventory perspective (total emission from the transmission and storage sector) to intensity (emission per unit of delivered gas), we need to know how many facilities there are in the nation, on average how many facilities the transported gas would go through, and the total natural gas throughput. We use the activity factors (installed horsepower, number of stations, etc.) from the US Environmental Protection Agency (EPA) to scale the Zimmerle emission factors to US natural gas midstream operations for 2020 (the latest data year available at the time of the conducted analysis). The following discussion provides more detail on how we used these data to calculate emission intensities and provides emission factors for use in natural gas midstream emissions modeling.

## Midstream combustion emissions and facility inventory

We first summarize the midstream facility inventory, annual compression energy used for each facility type, and fractions of centrifugal and reciprocating compression energy for each facility type based on data in the EPA’s annual GHG Inventory (GHGI) documentation.17,18 The result is shown in Table 4.

Table 4 Activity factors for transmission and storage compression energy (representative of 2017 GHGRP data)

| **Parameter** | | **Value** | **Units** | **Notes** |
| --- | --- | --- | --- | --- |
| Transmission | Centrifugal Compressor | 0.193 | dimensionless | Fraction of centrifugal compression energy to total transmission compression energy |
| Reciprocating Compressor | 0.807 | dimensionless | Fraction of reciprocating compression energy to total transmission compression energy |
| Transmission energy | 7.53E+10 | HPh | Total US transmission compression energy |
| Transmission facilities | 2,267 | Count | Total US transmission facilities |
| Storage | Centrifugal Compressor | 0.260 | dimensionless | Fraction of centrifugal compression energy to total storage compression energy |
| Reciprocating Compressor | 0.740 | dimensionless | Fraction of reciprocating compression energy to total storage compression energy |
| Storage energy | 6.63E+09 | HPh | Total US storage compression energy |
| Storage facilities | 344 | Count | Total US storage facilities |
| Transmission vs. Storage | Transmission/Storage (energy) | 11.4 | dimensionless | Ratio of transmission to storage energy |
| Transmission/Storage (count) | 6.59 | dimensionless | Ratio of transmission to storage facility counts |

To calculate the combustion-related GHG emissions from the compressor drivers, we also summarize the GHG emission factors for transmission and storage compressor drivers (shown in Table 5). These emission factors account for the CO2, CH4, and N2O emissions from the combustion of natural gas in turbines and reciprocating engines. The methane emission factors have low and high bounds representing the 95% confidence intervals implied by Zimmerle’s methane emission measurement study of natural gas transmission and storage stations. The probability distribution function is positively skewed; we are using a lognormal distribution to represent this skewed distribution.

Table 5 Greenhouse gas emission factors for transmission and storage compressor drivers

| **GHG Emission** | **Emission Source** | **Low** | **Mean** | **High** | **Standard deviation (geometric)** | **Units** |
| --- | --- | --- | --- | --- | --- | --- |
| CO2 | Turbine | - | 0.0473 | - | - | kg CO2/MJ NG combusted |
| Reciprocating Engine | - | 0.0473 | - | - | kg CO2/MJ NG combusted |
| CH4 | Turbine, Transmission | 2.34E-06 | 3.23E-06 | 4.38E-06 | 1.17 | kg CH4/MJ NG combusted |
| Reciprocating Engine, Transmission | 3.90E-04 | 4.84E-04 | 5.96E-04 | 1.11 | kg CH4/MJ NG combusted |
| Turbine, Storage | 8.18E-07 | 2.97E-06 | 1.01E-05 | 1.86 | kg CH4/MJ NG combusted |
| Reciprocating Engine, Storage | 3.80E-04 | 4.73E-04 | 5.89E-04 | 1.12 | kg CH4/MJ NG combusted |
| N2O | Turbine | - | 1.29E-06 | - | - | kg N2O/MJ NG combusted |
| Reciprocating Engine | - | 0 | - | - | kg N2O/MJ NG combusted |

The prime mover thermal efficiencies for the turbines and reciprocating engines for the transmission and storage compressors are also summarized in Table 6**.** These efficiencies account for the share of fuel or electric energy converted to compression energy. They are based on Zimmerle’s characterization of transmission and storage facilities, wherein the known technology parameters (combustion or electric, engine or turbine, lean or rich burn, 2 or 4 stroke), known horsepower ratings, and manufacturer specifications are used to estimate the thermal efficiencies of prime movers. The data were collected in 2012 and are representative of 2,306 compressor drivers at 464 transmission facilities and 269 compressor drivers at 53 storage facilities. No data are available that are more recent than this comprehensive assessment.

Table 6 Prime mover thermal efficiencies.

| **Site Type** | **Prime Mover** | **Prime Mover Efficiency** |
| --- | --- | --- |
| Transmission | Turbine | 28.7% |
| Reciprocating Engine | 34.6% |
| Storage | Turbine | 25.7% |
| Reciprocating Engine | 34.7% |

The energy intensity required to compress per unit of natural gas during midstream is also summarized in Table 7. These energy intensities are based on a first-principles approach that uses the thermophysical properties of methane to calculate the compression energy at supercritical conditions, an inlet temperature of 298K, and a 1.5 compression ratio. For centrifugal compression, the calculations are based on polytropic compression with a polytropic efficiency of 80%. For reciprocating compression, the calculations are based on isentropic compression with an isentropic efficiency of 85%.

We calculated the weighted average compression energy intensity in Table 7by factoring the compression energy intensity for each compressor type (centrifugal and reciprocating) by the transmission compressor shares in Table 4.

Table 7 Transmission facility compression energy intensity.

| **Compressor Type** | **Compression Energy Intensity** | **Units** |
| --- | --- | --- |
| Centrifugal | 3.05E-02 | HPh/kg |
| Reciprocating | 2.53E-02 | HPh/kg |
| Weighted Average | 2.86E-02 | HPh/kg |

## Midstream venting and fugitive emissions

The station-level methane venting and fugitive emission factors (Mg CH4 per station per year) are shown in Table 8. These factors account for various fugitive and vented methane emission sources from transmission and storage facilities. Fugitive emissions account for the unintentional releases of methane. Vented emissions comprise intentional releases from intermittent controllers (pneumatic devices) and intentional releases of methane for maintenance for safety reasons. The low and high values for each parameter represent a 95 percent confidence interval, which is based on the results of Zimmerle’s transmission and storage analysis.

Table 8 Venting and fugitive emissions from natural gas transmission and storage stations.

| **Emission Source** | | **Mg CH4/station-yr** | | |  |
| --- | --- | --- | --- | --- | --- |
| **P2.5** | **Mean** | **P97.5** | **standard deviation (geometric)** |
| Transmission Station Fugitives | Station | 34.3 | 64.7 | 126.1 | 1.41 |
| Reciprocating compressor | 114.6 | 189.1 | 310.3 | 1.29 |
| Centrifugal compressor (wet seals) | 19.7 | 37.1 | 67.5 | 1.36 |
| Centrifugal compressor (dry seals) | 15.5 | 26.9 | 45.9 | 1.31 |
| Uncategorized/super-emitter | 95.2 | 200.7 | 308.7 | 1.25 |
| Storage Stations Fugitives | Station | 47.5 | 70.7 | 107.2 | 1.24 |
| Compressors | 211.9 | 277.5 | 362.9 | 1.15 |
| Uncategorized/super-emitter | 37.7 | 201.6 | 463.6 | 1.53 |
| Pneumatic Devices | Transmission stations | 12.7 | 25.5 | 48.6 | 1.39 |
| Storage stations | 130.7 | 175.4 | 233.2 | 1.16 |
| Station Venting | Transmission stations | 37.4 | 57.5 | 87.7 | 1.24 |
| Storage stations | 25.9 | 41.9 | 66.7 | 1.27 |

## Natural gas throughput

The throughput-weighted average natural gas throughput is 4.80 billion kilograms of natural gas per transmission station per year (252 BCF NG/station-yr). We calculated this throughput by factoring the thermal efficiencies of compressor drivers developed in Table 6, the average compression energy intensity in Table 7**,** and the energy content of fuel consumed by 1,390 natural gas transmission stations in the US in 2016. The energy content of fuel consumed by natural gas compressor stations is based on FERC and EPA data, which we accessed via the Homeland Infrastructure Foundation-Level Database.19

## Midstream emission intensity summary

With the facility inventory and natural gas throughput derived in 2.1.1-2.1.3, we can estimate a national average midstream GHG emission intensity accounting for both the methane venting and fugitive emissions from facilities and the combustion-related emissions from natural gas compression.

Table 9 shows the venting and fugitive methane emissions from transmission and storage stations. These emissions are pulled from Table 8, converted from Mg to kg of emissions, and divided by average natural gas throughput to arrive at a factor that expresses methane emissions per unit of single-station throughput (kg CH4/kg NG-transmission station).

Table 9 Midstream venting and fugitives emission intensity summary

| **Emission Source** | | **kg CH4/station-yr** | **kg CH4/kg NG-transmission station** |
| --- | --- | --- | --- |
| Transmission Station Fugitives | Station | 6.47E+04 | 1.14E-05 |
| Reciprocating compressor | 1.89E+05 | 3.33E-05 |
| Centrifugal compressor (wet seals) | 3.71E+04 | 6.53E-06 |
| Centrifugal compressor (dry seals) | 2.69E+04 | 4.73E-06 |
| Uncategorized/super-emitter | 2.01E+05 | 3.53E-05 |
| Storage Station Fugitives | Station | 7.07E+04 | 5.47E-06 |
| Compressors | 2.77E+05 | 2.15E-05 |
| Uncategorized/super-emitter | 2.02E+05 | 1.56E-05 |
| Pneumatic Devices | Transmission stations | 2.55E+04 | 4.48E-06 |
| Storage stations | 1.75E+05 | 1.36E-05 |
| Station Venting | Transmission stations | 5.75E+04 | 1.01E-05 |
| Storage stations | 4.19E+04 | 3.24E-06 |

Table 10shows the combustion-related GHG emissions from transmission and storage stations. Engines are used to drive reciprocating compressors and gas-fired turbines, and electric motors are used to drive centrifugal compressors.

For transmission compressors, the compression energy is calculated by factoring the shares of reciprocating vs. centrifugal compressors (Table 4) at US transmission facilities by the compression energy intensities for the two compressor types (Table 7). Further, for centrifugal compressors, 95% of energy comes from gas-fired turbines and the remaining 5% comes from electricity-driven motors.

The compression energy is calculated for storage compressors by factoring the shares of reciprocating vs. centrifugal compressors at US storage facilities by the ratio of US storage to transmission compression energy (Table 4). Again, for centrifugal compressors, 95% of energy comes from gas-fired turbines and the remaining 5% combines from electricity-driven motors.

For fuel and electricity consumption, the compression energies are factored by the prime mover efficiencies (Table 6). A unit conversion is applied to convert from HPh to MJ. The resultant GHG emissions are calculated by factoring fuel and electricity consumption by the emission factors in Table 5.

Table 10 Midstream combustion emission intensity summary

| **Compressor Exhaust Source** | **Compression Energy** | | **NG Fuel and Electricity** | | **GHG Emissions (kg/kg NG-station)** | | |
| --- | --- | --- | --- | --- | --- | --- | --- |
| **CO2** | **CH4** | **N2O** |
| Engines (transmission) | 2.04E-02 | HPh | 1.59E-01 | MJ | 7.50E-03 | 7.68E-05 |  |
| Turbines (transmission) | 5.58E-03 | HPh | 5.23E-02 | MJ | 2.47E-03 | 1.69E-07 | 6.74E-08 |
| Electric (transmission) | 2.94E-04 | HPh | 8.30E-04 | MJ | 1.26E-04 |  |  |
| Engines (storage) | 1.71E-03 | HPh | 1.33E-02 | MJ | 6.27E-04 | 6.28E-06 |  |
| Turbines (storage) | 5.71E-04 | HPh | 5.98E-03 | MJ | 2.83E-04 | 1.78E-08 | 7.71E-09 |
| Electric (storage) | 3.01E-05 | HPh | 8.50E-05 | MJ | 1.29E-05 |  |  |

The total CO2e emissions from Table 9andTable 10are 0.018 kg CO2e/kg NG-station. On average, natural gas passes through 8.2 compressor stations between processing and consumption. The average compressor station count is based on an average transmission distance of 776 km and an average interstation distance of 88 km described in the previous study.20 Additional unit conversions (1 kg = 1,000 g), density conversions (19 kg NG/MCF NG), and energy conversions (1,088 MJ/MCF NG) give an emission intensity of **2.65 g CO2/MJ NG delivered**.

In terms of a more useful emission factor, to be applied according to the total transmission distance for a given scenario, the above emission intensity translates to **4.00 kg CO2e/MMCF-km**.

## The natural gas percentage contribution matrix from the production field to the processing plant

Our optimization problem consists of delivering natural gas from production fields to processing plants with a minimum distance covered.

Once the production and processing plant data is collected, we inspect and clean data for use in our model. Our modeled natural gas network in the US accounts for 777 active gas-producing counties, in addition to 593 processing plants. For each field and processing plant, the dataset includes the geographic coordinates as well as the yearly production rate in (MSCF/year).

We use linear programming to solve for optimal flows to approximate actual flows between fields and processing plants, and processing plants and consuming regions. To apply this method, a distance matrix is constructed for the production county centroids and processing plant centroids using Python functions. The distance matrix is then reshaped into a long vector with dimensions [1, number of gas-producing counties * number of processing plants], which is used to optimize the natural gas flow. Supply and demand matrices are created based on the field natural gas production as well as the processing plant throughput. Shipments must satisfy a constraint that the natural gas delivered should not exceed the plant capacities, and that all gas produced must go to a processing plant.

As linear programming is computationally intensive when treating large examples, we use the K-means clustering technique to divide the network into smaller clusters, which are faster to optimize. The clusters optimization outputs are then reassembled into the overall result. The output matrix accounts for 777 counties by 593 natural gas flows between production counties and processing plants. Such a big matrix is challenging to visualize. Therefore, this step consists of allocating each processing plant and natural gas field to its corresponding state. This step allows picturing the natural gas flow between the states and helping us validate the results of the optimization. The producing county to processing state natural gas flow matrix result is shown in Extended Data Table 19.

## The natural gas percentage contribution matrix from processing state to delivery state

We model the natural gas flows from the processing plants to the consumption state using a Leontief input-output model. The Leontief input-output model is a method developed by Wassily Leontief in 193021 to model economic systems using matrices. It is based on the idea that the economy is divided into sectors that produce products consumed within the sectors themselves as well as in other sectors. It follows that every sector within the system must produce enough to satisfy internal and external demand.

Following the Leontief’s method published in previous literature22, we construct the Leontief input-output matrix with gas processing and consumption data, normalizing the columns. The inverse of the normalized Leontief matrix would reveal the percentage contribution from all states for natural gas consumed within a given state or region. For the ease of calculation, we group the natural gas flows to the state levels. The supply vector in the Leontief matrix corresponds to the total natural gas processed per state per year after grouping the instate processing plants’ throughput. The demand vector corresponds to the total natural gas received by the state. The resulting state-by-state percentage contribution matrix is shown in Extended Data Table 16.

## The state processing and delivery centroid for natural gas traveled distance estimation

We take the processing centroids and delivery centroids constructed in Littlefield et al. (2022)20 to estimate the distance travelled by the natural gas flow from the processing state to the delivery state. The processing centroids are the weighted geographical centers of processing plants for each state. The delivery centroids are the population center of each state based on US Census Bureau data for 2010. We use a tortuosity factor of 1 here for simplicity, though recognize that the path taken by gas will rarely be the shortest path derived from linear programming. The method is described in detail in Littlefield et al. (2022).20 The centroid used in this study is taken from Littlefield et al. (2022)20 and shown in Extended Data Table 17-18.

## Connecting the moving pieces

The natural gas produced in each field flows from the gas production field to different processing plants based on our optimization results described in 2.2. The natural gas gathered at each processing plant flows to different delivery state by a given percentage based on our Leontief input-output results described in 2.3. The number of flows we need to understand the midstream transmission CI for gas produced in one field are shown in Figure 2.


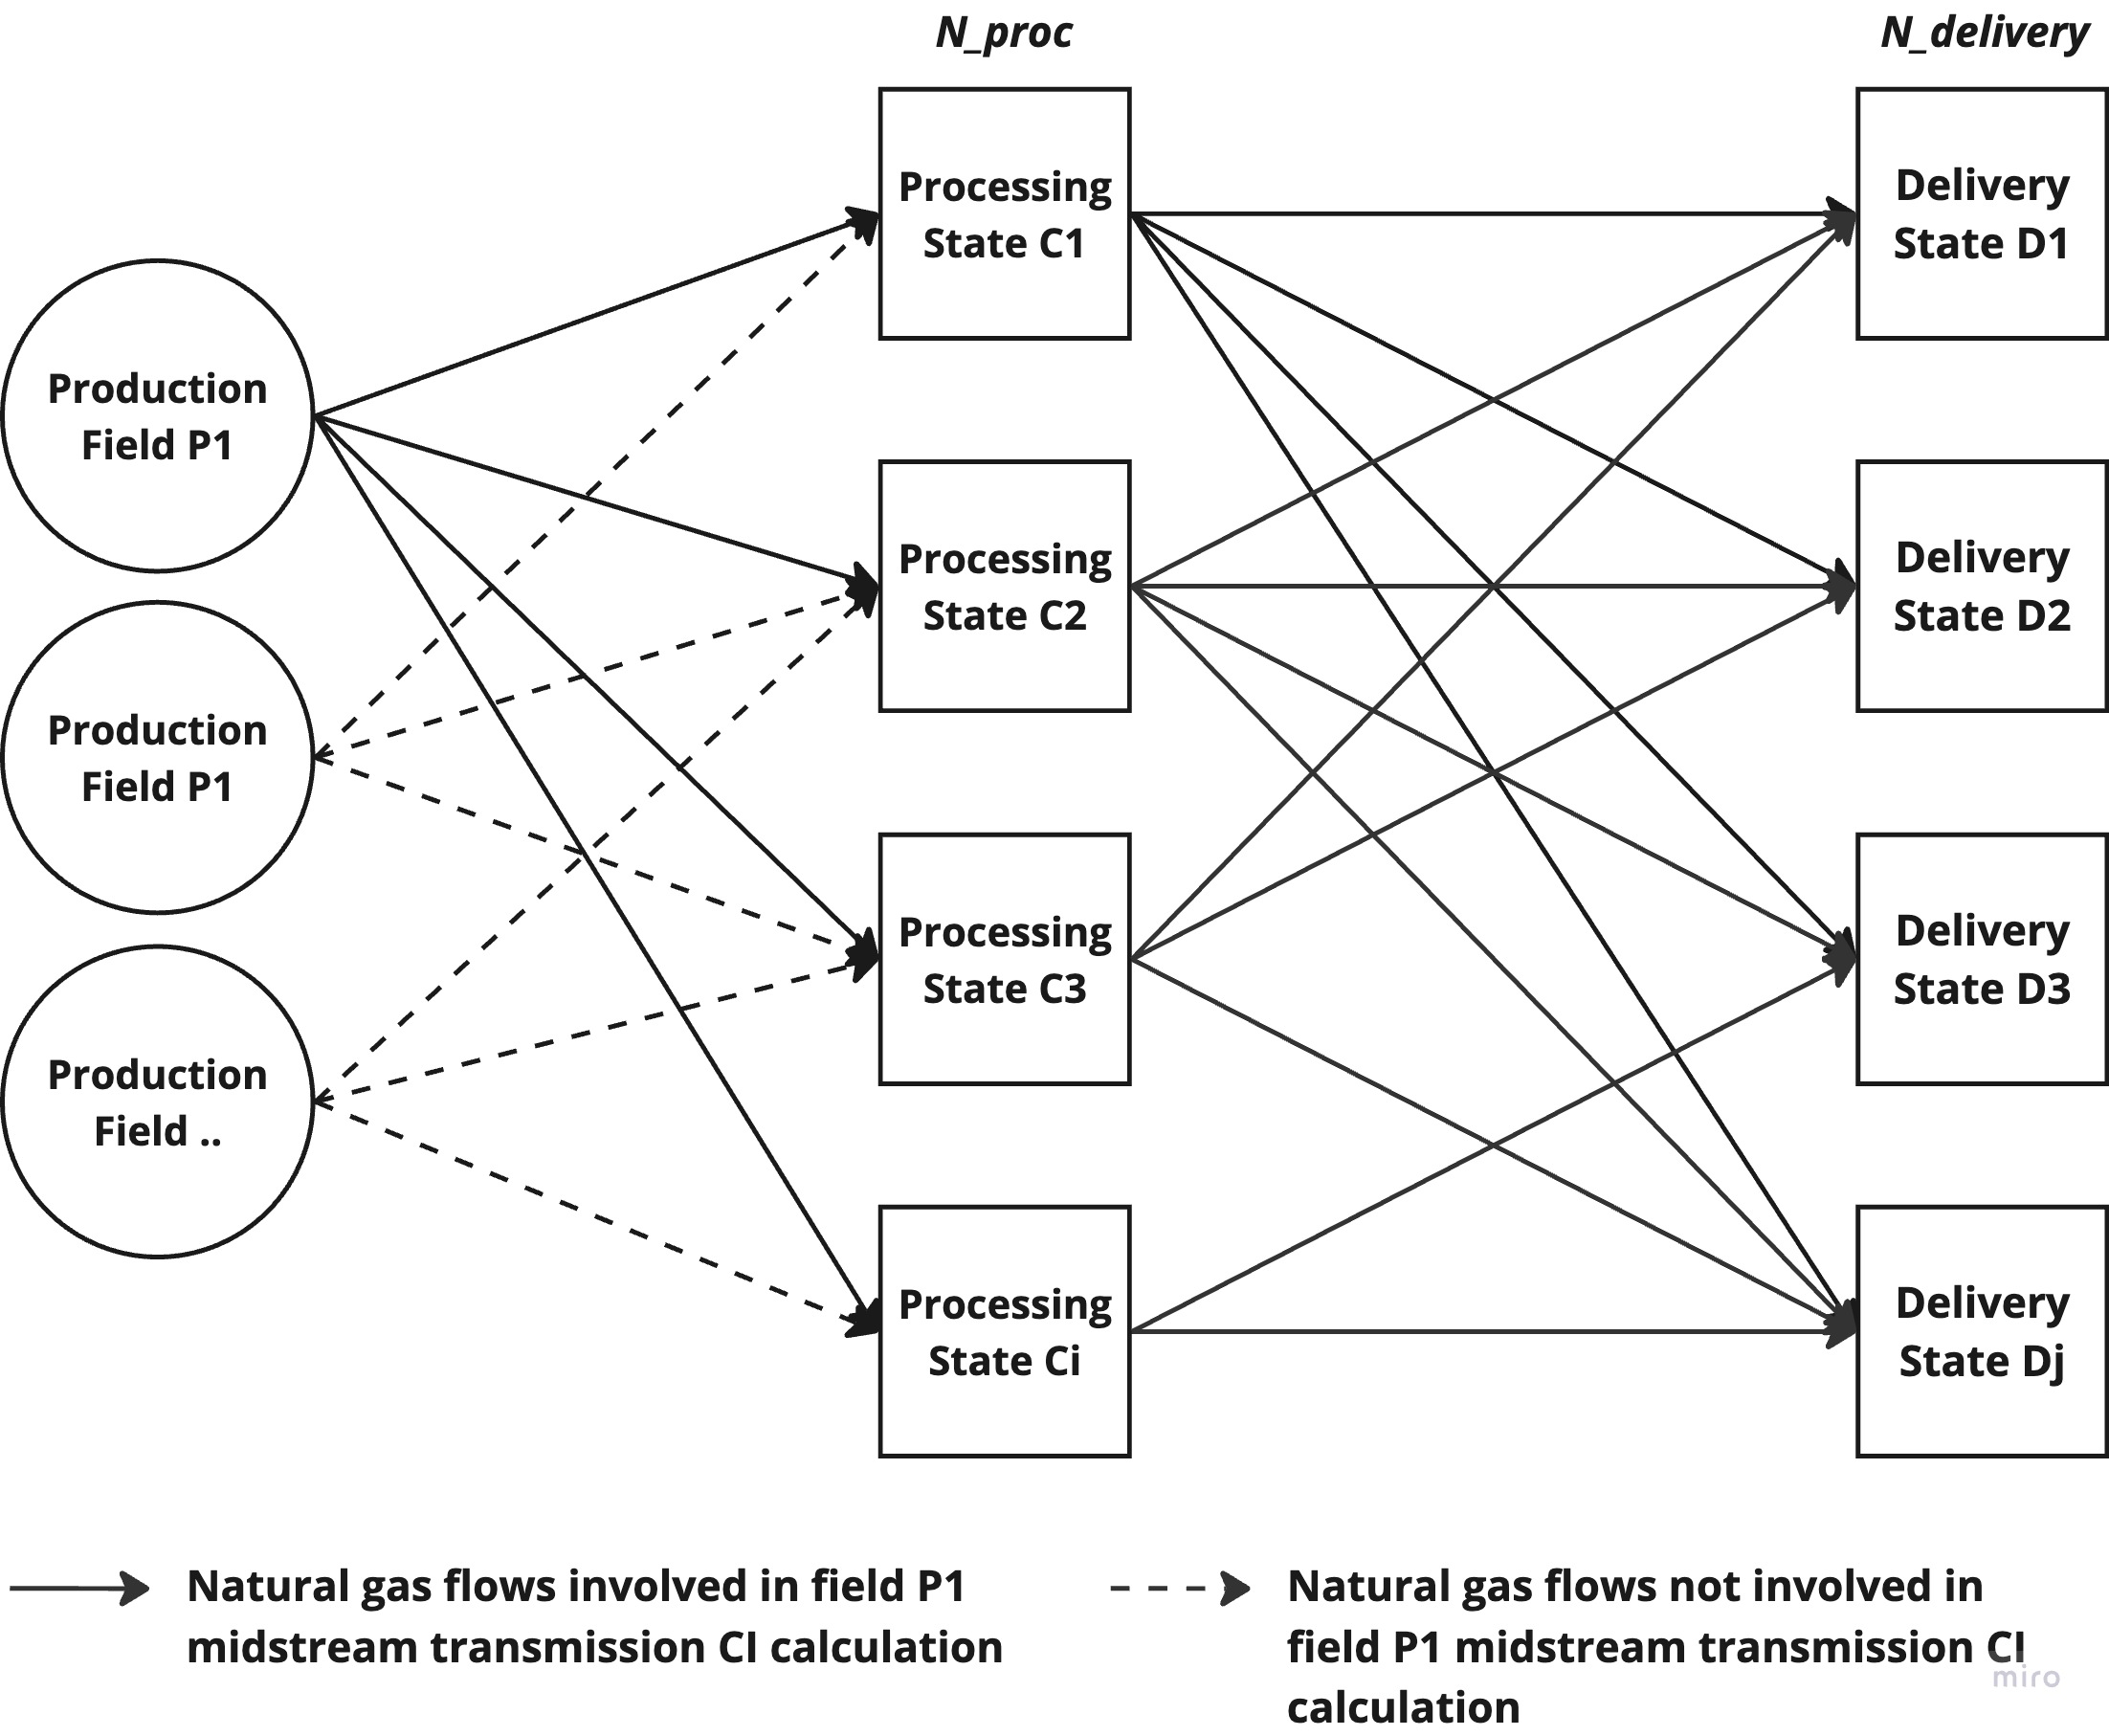


**Figure 2 The natural gas flows from production fields to processing plants and to delivery states.**

Production field Px is a gas production field defined in Main 3.4 and SI 1.3. The processing state Ci is in which state a processing plant is located. The delivery state Dj is the final state of delivery. The solid arrows are the natural gas flows used in the midstream transmission CI calculation of production field P1. The dotted arrows are not used in the calculation for production field P1 but for other production fields. The figure is created in MIRO.

The way we calculate the midstream transmission emission CI for each production field using the four components derived above can be summarized as **Equation 3** below:

Where *CImid,P* is the midstream transmission emission related CI for natural gas produced in field P; *γ* is the midstream emission activity factor of 4 kgCO2e/MMCF-km, described in SI 4.1 and SI Text 2; *Vp* is the total natural gas production volume in the production field P; *αP,Ci* is the percentage of natural gas flowing from production field P to processing state *Ci* with respect to natural gas production in production field P; *βCi,Dj* is the percentage of natural gas flowing from processing state *Ci* to delivery state *Dj*with respect to natural gas throughput in processing state *Ci*; *dCi,Dj* is the distance from the processing centroid in state *Ci* to the delivery centroid in the state *Dj*; *Nproc* is the number of processing plant states the field P connects to; *Ndelivery* is the number of delivery states the processing plant state Ci connects to.

Using the above results and equations, we can understand the midstream transmission CI for the natural gas produced in different fields. The result is shown in Extended Data Table 19-21.

# GHG mitigation scenarios

We design GHG mitigation scenarios by changing the input parameters and re-run the upstream production fields in OPGEE to understand the impact on GHG emissions under each scenario. We design the following scenarios: “No routine flaring - gas” “No routine flaring – Moderate” “No routine flaring – Extreme” “No routine flaring -region specific” “Minimal venting and fugitives – Moderate” “Minimal venting and fugitives – Extreme”. The scenario definition is listed below:

## “No routine flaring” scenario

The “no routine flaring” scenario is defined as reducing the flare-oil-ratios (FOR) to no larger than 1.05 (“No routine flaring – Moderate”) or 0.19 SCF gas flared/BBL oil produced (“No routine flaring – Extreme”). The two thresholds are the 25%ile or 5%ile FOR of the studied US oil and gas fields with flaring activities, respectively.

Where FORno routine flaring is the FOR used for each field in the OPGEE assessment for the “No routine flaring” case study; FORbase is the actual FOR for each field; threshold is 1.05 or 0.19 SCF/BBL for the “Moderate” or “Extreme” case, respectively.

## “Minimal VF” scenario

The “Minimal VF” scenario is short for minimal venting and fugitive activities. The scenario is defined as reducing the fractional methane loss rates to 50% (“Minimal VF – Moderate”) or 25% (“Minimal VF – Extreme”).

## “No routine flaring & Minimal VF” scenario

The “No routine flaring & Minimal VF” scenario is defined as reducing the field FOR to no greater than 0.19 SCF/BBL (5%ile FOR of all studied flared fields) and reducing the fractional methane loss rates to 25%.

## “Current” scenario

The “Current” scenario is the standard scenario with observed input data for year 2022.

# Calculating the total GHG emissions

The estimated total GHG emissions in million metric tons carbon dioxide equivalents (MMT CO2eq) is converted based on the carbon intensities (gCO2eq/MJ) and the volumetric energy content of natural gas, described by the following equation:

Where *CI* [gCO2eq/MJ] represents the carbon intensity of natural gas; *Annual Gas Production* [MSCF] is the total volume of gas produced in 2022, measured in thousand standard cubic feet; *HV* [MJ/MSCF] is the energy content of natural gas, here we use 1093 MJ/MSCF based on EIA estimates for US average natural gas consumption (total heat content) in 202223**;** 10­12 is the conversion factor to express the result in the unit of million metric tons (MMT).

# Additional Results

# Process breakdown of the upstream GHG emissions

Figure 3 shows the process breakdown of the upstream GHG emissions for each field (i.e., production area). Production and extraction are the dominant process stages, accounting for 62.93% of the upstream CI. Surface processing accounts for 30.69% of the upstream CIs. Within the unit processes of the surface processing stage, gas gathering, demethanizer, acid gas removal, and gas dehydration are the leading contributors to GHG emissions.


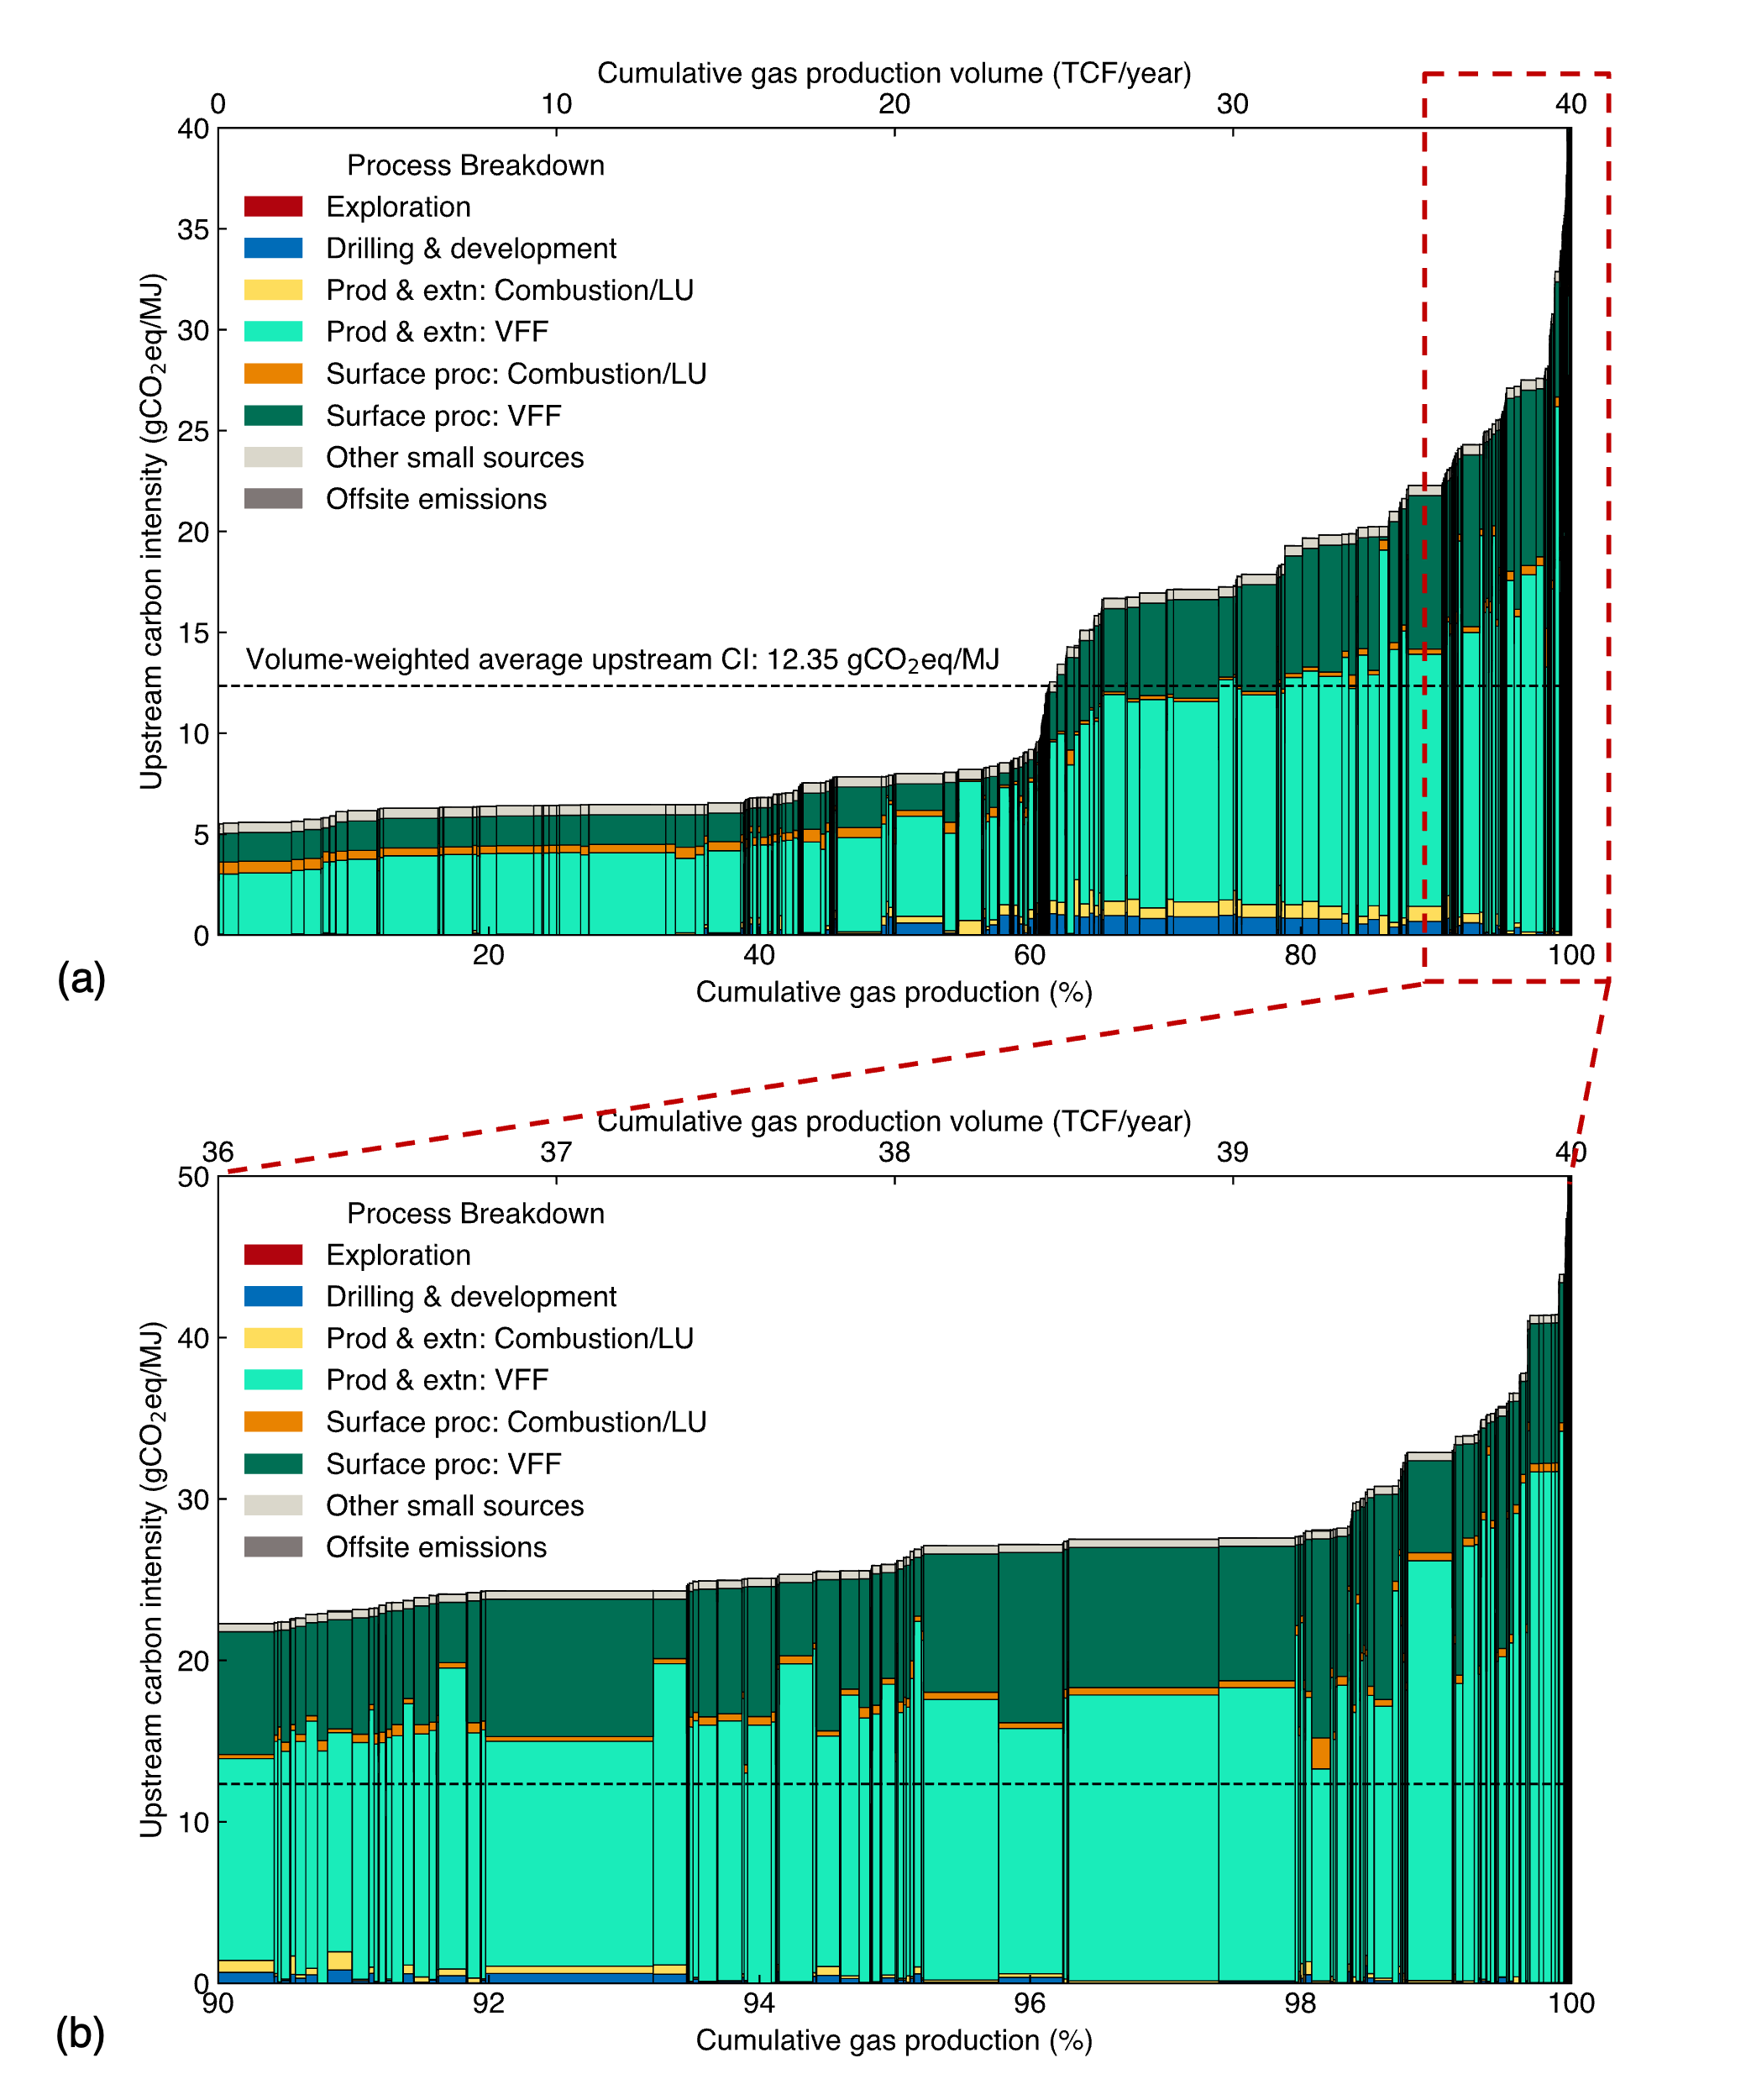


Figure 3 The process breakdown for the field-level upstream carbon intensity curve.

The share of emissions (credit/debit) related to exploration, drilling & development, production & extraction (abbreviated as “Prod & extn”), surface processing (“Surface proc”), other small sources, and offsite emissions. The production & extraction and surface processing stages are broken down into Combustion/Land Use and VFF (venting, flaring, fugitives) segments. (a) The process breakdown for field-level upstream CI for all covered production. (b) Zoomed-in process breakdown for the highest 10-percentile fields with the highest upstream CIs. The contribution of venting, flaring, and fugitives from production & extraction, and surface processing is significantly higher for the high CI fields.

# A detailed look at the fields in the highest 5-percentiles for upstream CIs

As described in Main 2.2, our results show that the fields with the highest 5 percentile upstream CIs are of high GORs, i.e. gas fields with abundant gas production (Figure 4). This is due to the high non-combustion methane emissions from venting and fugitives. The methane loss rates corresponding to each field are shown in Figure 5. Fields with high methane loss rates would have high upstream production CIs, despite its GORs.


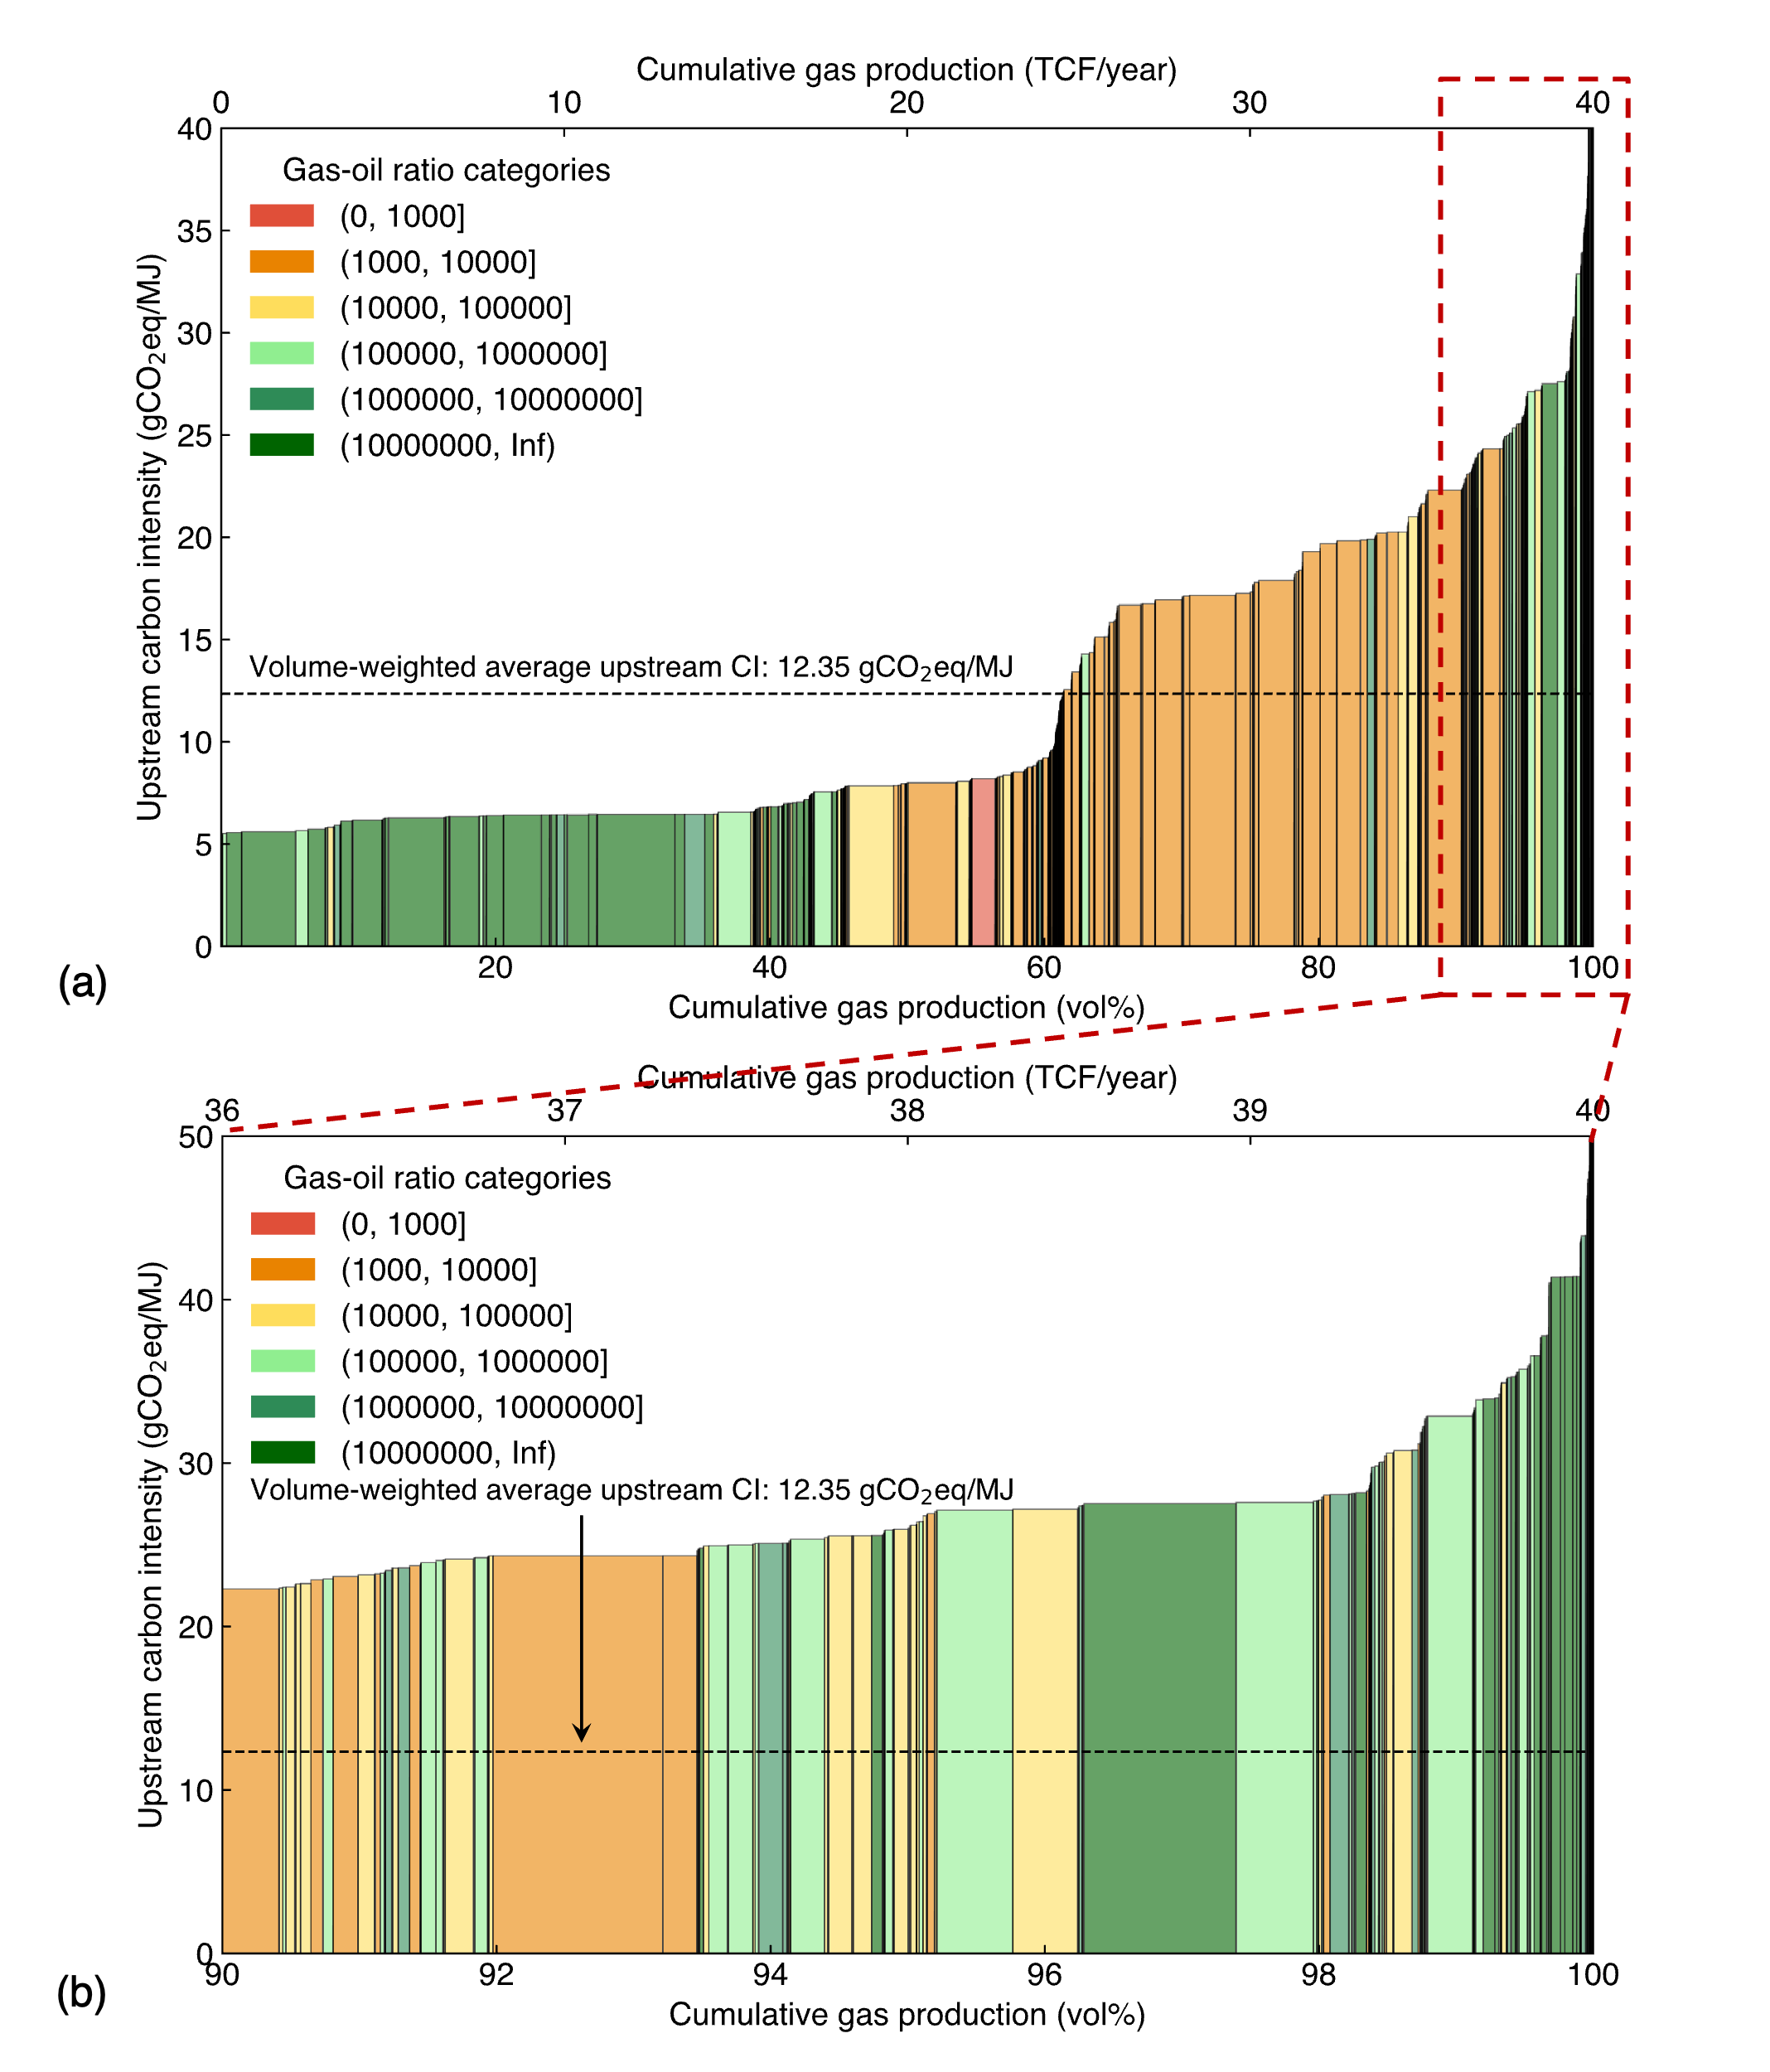


Figure 4 The field-level upstream carbon intensity supply curve for US natural gas in 2022 (a) and zoomed-in version for the fields with CIs in the highest 10 percentile (b).

The color indicates the gas-oil ratios (GOR, unit: SCF/BBL) for each field. For 0-95% of the production, fields with lower GORs (shown in color red, orange, and yellow) concentrate with higher upstream CIs compared to fields with higher GORs (shown in light to dark green). However, the highest 5-percentile fields are of high GORs due to large methane losses from venting, fugitives, and flaring, as shown in Figure 5.

*
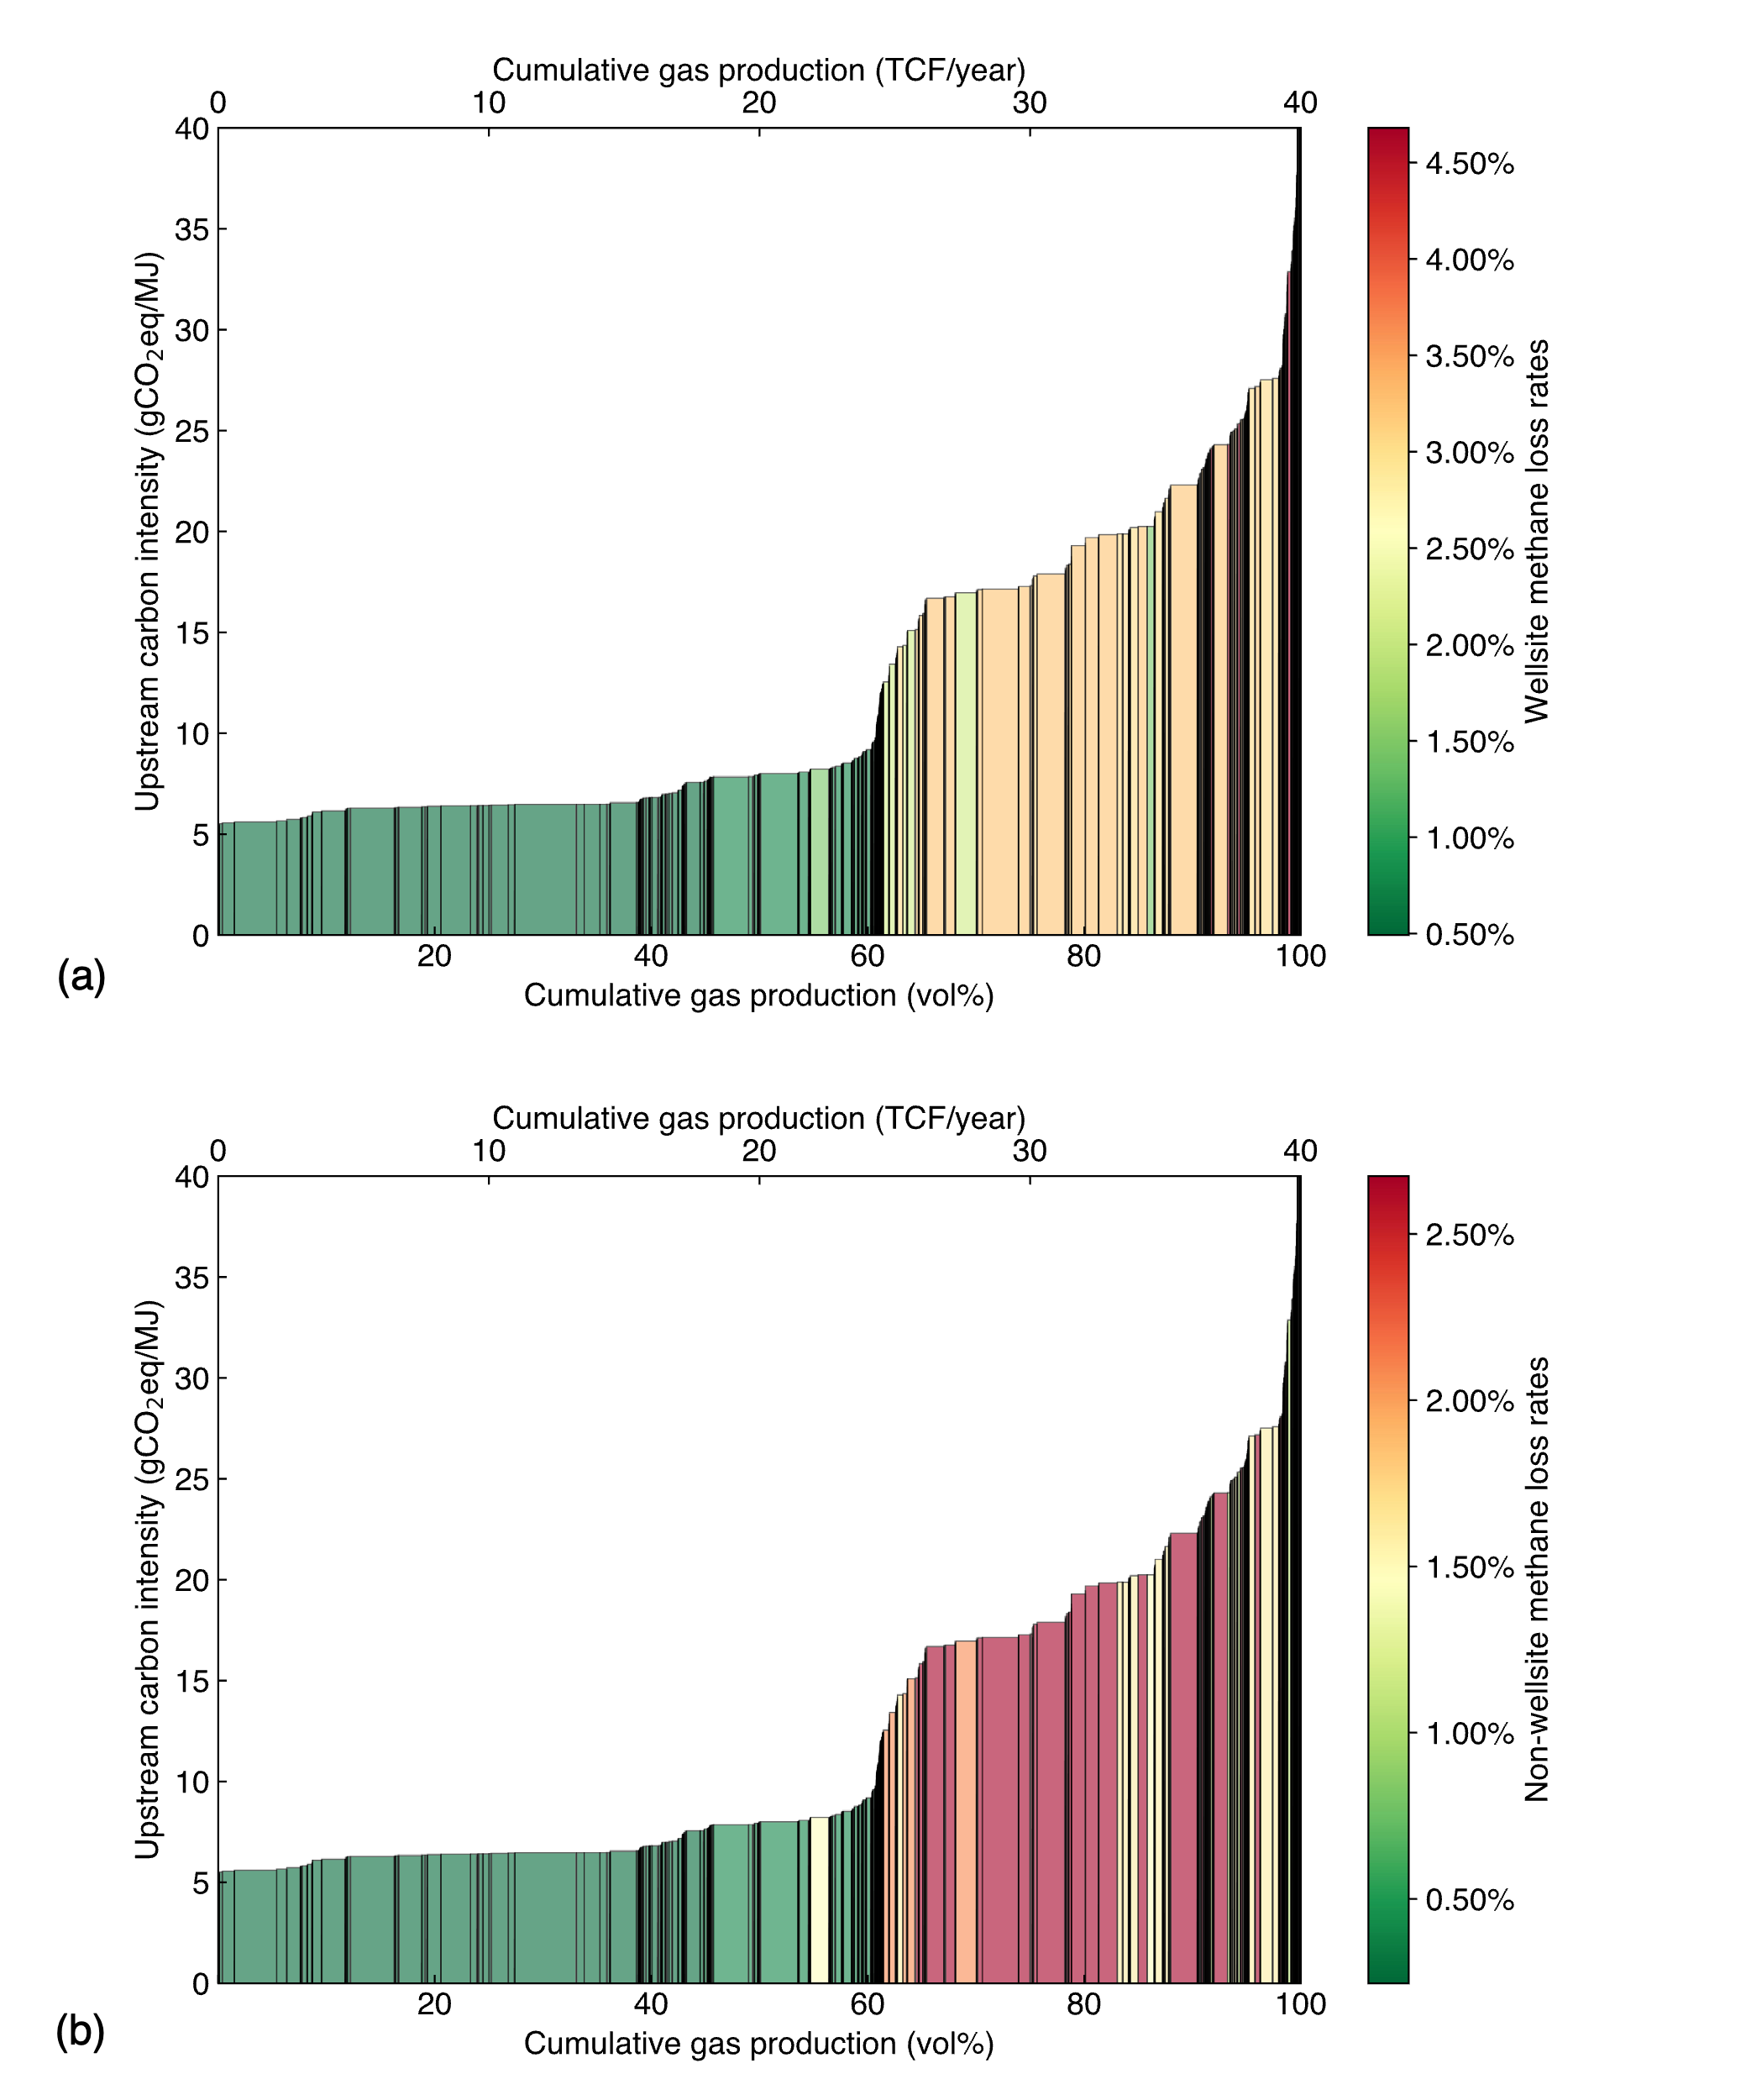
*

Figure 5 The field-level upstream carbon intensity and non-combustion methane loss rates (indicated by color) for US natural gas in 2022.

# Midstream GHG emission from production and delivery perspectives

As discussed in Main 2.3, the midstream (i.e. transmission) CIs and GHG emissions are different for gas produced from and gas delivered to each state. This paper focused on the production perspective, however, we do like to shine a light on how different the CIs could be for gas produced in or consumed in one state, given how much gas it imports from other regions. The midstream CIs for gas produced in each state, i.e. from production perspective, are shown in Table 11. The midstream CIs for gas delivered to each state, i.e. from consumption perspective, are shown in Table 12. Notice how California has the lowest midstream CI of 1.44 gCO2eq/MJ from the production perspective, given most of its produced gas is consumed in state and travel minimal distances to its destination. However, from the consumption perspective, California has one of the highest midstream CI of 5.29 gCO2eq/MJ, given 90% of its gas consumption is imported, 35% from Texas and 29% from New Mexico. The state-level production-delivery gas transmission CI and volume matrix is shown in Figure 6. The detailed matrix data can be found in Extended Data Table 19.

Table 11 The midstream CIs for natural gas produced in each state or region in the US for 2022, sorted by CI from high to low.

| Production State/Region | Midstream CI [gCO2eq/MJ] |
| --- | --- |
| Wyoming | 5.96 |
| Utah | 5.29 |
| Colorado | 4.31 |
| Nevada | 3.36 |
| Nebraska | 3.26 |
| Texas | 3.24 |
| Arkansas | 3.22 |
| Michigan | 3.22 |
| Ohio | 3.21 |
| Montana | 3.19 |
| Virginia | 3.19 |
| Kentucky | 3.08 |
| Tennessee | 3.03 |
| Kansas | 3.02 |
| North Dakota | 2.90 |
| New York | 2.89 |
| South Dakota | 2.86 |
| New Mexico | 2.82 |
| West Virginia | 2.77 |
| Oklahoma | 2.76 |
| Louisiana | 2.75 |
| Alabama | 2.74 |
| Pennsylvania | 2.67 |
| Mississippi | 2.67 |
| Offshore Gulf of Mexico | 2.32 |
| California | 1.44 |

Table 12 The midstream CIs for natural gas consumed in each state in the US for 2022, sorted by CI from high to low.

| Delivery State Name | Midstream CI [gCO2eq/MJ] |
| --- | --- |
| Maine | 10.29 |
| New Hampshire | 9.79 |
| Vermont | 9.39 |
| North Carolina | 7.43 |
| Idaho | 7.26 |
| Illinois | 6.20 |
| District of Columbia | 5.53 |
| Oregon | 5.33 |
| California | 5.29 |
| Florida | 5.19 |
| Washington | 5.15 |
| South Carolina | 5.01 |
| Wisconsin | 4.33 |
| Georgia | 4.13 |
| Iowa | 4.06 |
| Minnesota | 4.02 |
| Maryland | 3.94 |
| Nevada | 3.63 |
| Arizona | 3.41 |
| Alabama | 3.31 |
| Missouri | 3.29 |
| Tennessee | 3.24 |
| Massachusetts | 3.21 |
| Indiana | 3.18 |
| Nebraska | 3.07 |
| Michigan | 3.03 |
| Rhode Island | 2.89 |
| Virginia | 2.81 |
| Arkansas | 2.53 |
| Mississippi | 2.50 |
| South Dakota | 2.41 |
| Connecticut | 2.38 |
| Kentucky | 2.21 |
| Kansas | 2.14 |
| Montana | 1.87 |
| New Jersey | 1.85 |
| New York | 1.83 |
| Utah | 1.68 |
| New Mexico | 1.64 |
| Louisiana | 1.59 |
| Delaware | 1.56 |
| Colorado | 1.56 |
| Oklahoma | 1.39 |
| North Dakota | 1.34 |
| Wyoming | 1.15 |
| Pennsylvania | 1.02 |
| Ohio | 0.90 |
| Texas | 0.69 |
| West Virginia | 0.37 |


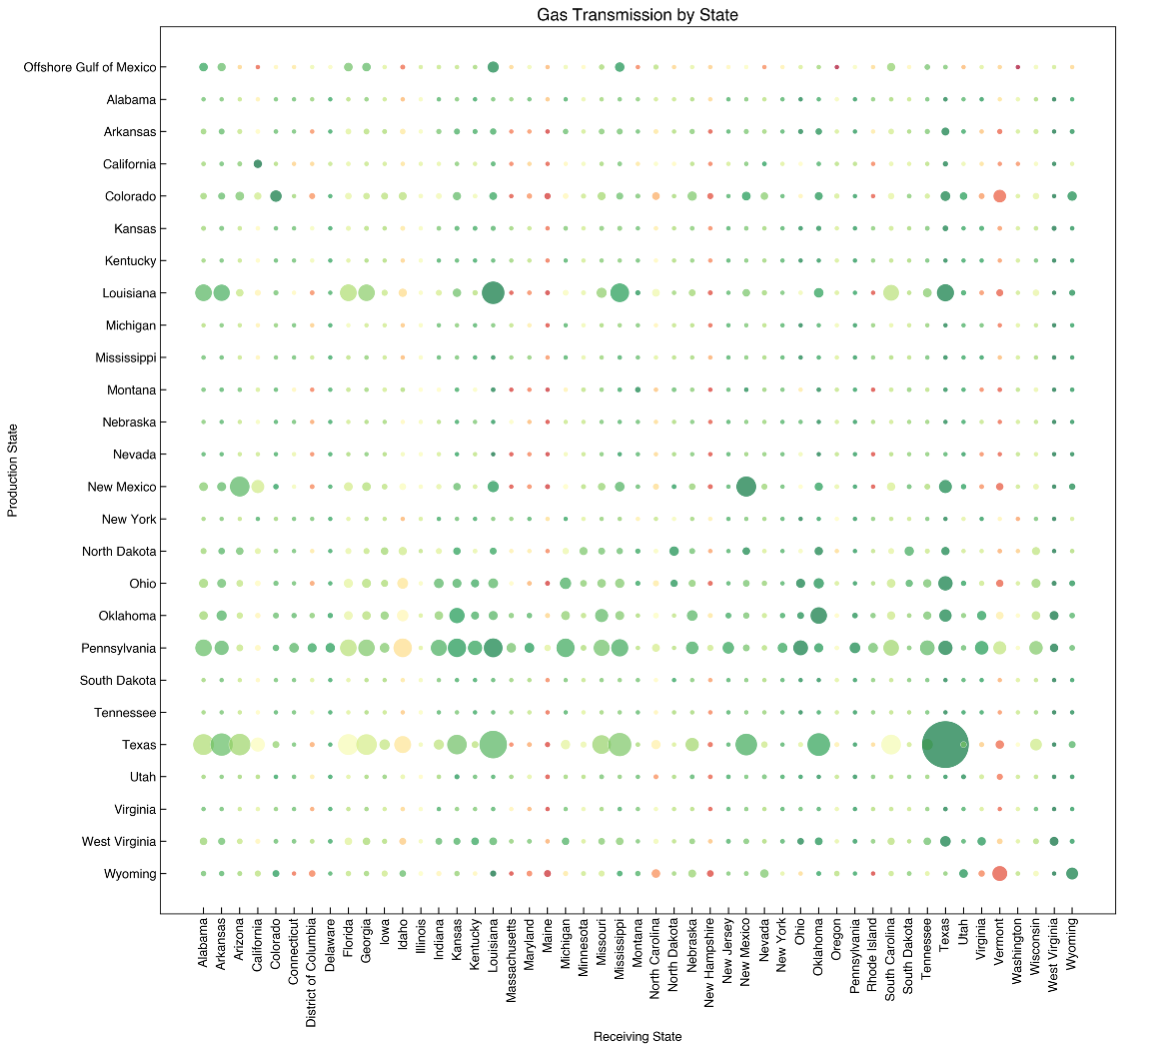


Figure 6 The state-level production-delivery midstream carbon intensity matrix.

The color of the dot at the cross-section indicates the midstream CI associated with the gas delivered to state B from the producing region in state A. The size of the dot indicates the total delivered gas volume.

# Uncertainties of the aerial measurement-based methane venting and fugitive loss rates

The upstream CI estimation uncertainty range relates to the choices of fractional methane loss rates derived from the latest aerial observation. The observation from Sherwin et al.11 covers six major basins in the US, accounting for 55% of the gas production covered in this study. However, the venting and fugitive emissions vary significantly temporarily and spatially, therefore using the synthesized methane loss rates would give a high range of uncertainty. We provide the uncertainty range for the upstream CI based on the 95-percentile confidence interval of the fractional methane loss rates given in Sherwin et al., including multiple forms of uncertainty (described in Sherwin et al. SI 4.2).

# GHG mitigation – case studies

To quantitatively understand how different mitigation cases would impact natural gas GHG emissions, we conduct four case studies with assumed mitigation measures described in SI 3. The resulting CI curves with comparison to the base case are presented in Figure 7.

Contrary to what commonly found in mitigating GHG emissions in the oil production industry, reducing flaring activities have minimal effect on the natural gas production GHG emissions. Fugitive emissions, on the other hand, become the leading contributor as well as a recommended mitigation focus. This becomes obvious after taking the airplane-derived emissions rates into consideration. The upstream CI can reduce 35% if we reduce the fugitive methane loss rate by 50% (see SI 3.2). The upstream CI can reduce 53% if we reduce the fugitive methane loss rate by 75% (see SI 3.2). In the extreme, the upstream CI can reduce 55% if we reduce the fugitive fractional methane loss rate by 75% and reduce the routine flaring to the extreme case (see SI 3.3). Therefore, it's essential to systematically integrate the super emitting activities into the GHG emission inventory and LCA on O&NG systems, given its high impact. The detailed CI results under different mitigation scenarios can be found in Extended Data Table 25.


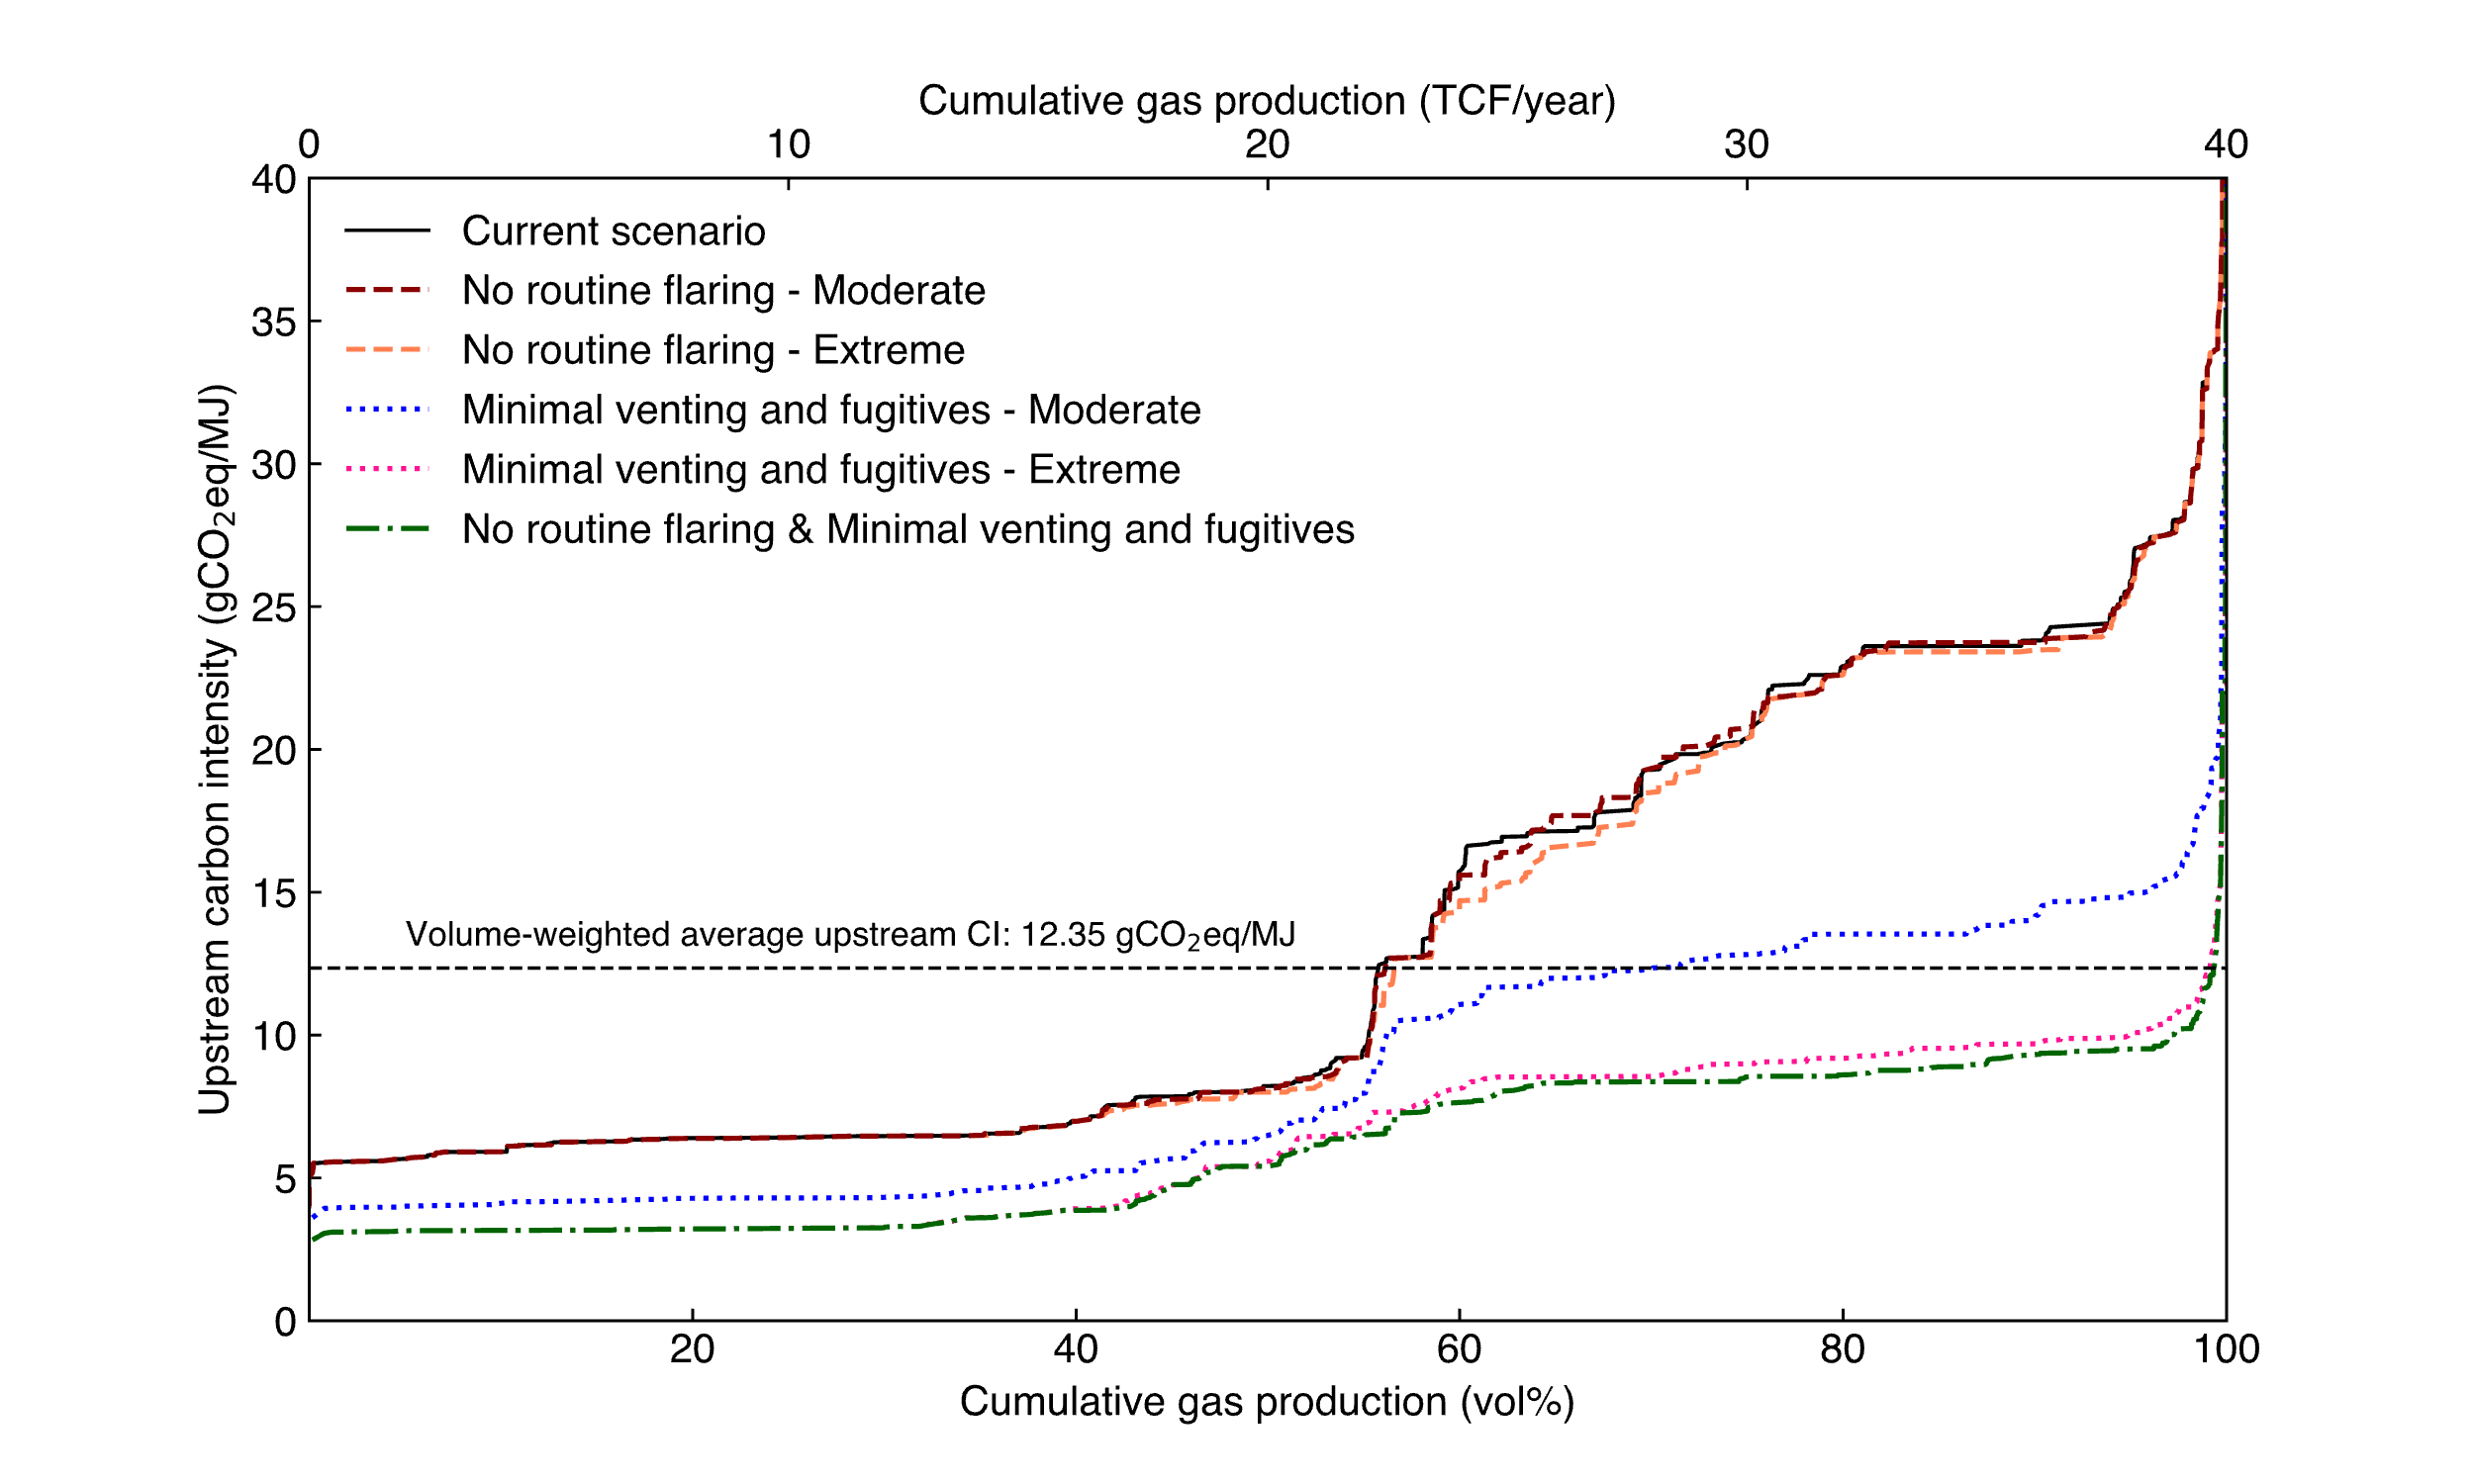


Figure 7 The field-level upstream CI curves for the US natural gas under different mitigation scenarios.

We run five different mitigation scenarios beside the current scenario as defined in S1.7: “No routine flaring – Moderate” (dashed dark red); “No routine flaring – Extreme” (dashed orange); “Minimal venting and fugitives – Moderate” (dotted blue); “Minimal venting and fugitives – Extreme” (dotted pink); “No routine flaring & Minimal venting and fugitives” (dotted-dashed dark green).

# Validation

Our reported well-to-transmission CI for US natural gas is 15.46 gCO2eq/MJ. Our well-to-transmission CI is higher than Littlefield et al.20’s well-to-distribution CI of 8.1-13.0 gCO2eq/MJ even with an extended system boundary and comparable with Jiang et al.24’s well-to-transmission CI of 17.0 gCO2eq/MJ for Marcellus shale gas, which is of higher emissions compared to conventional natural gas given its use of horizontal drilling and fracturing during production. Our result is consistently higher than previous natural gas LCA studies of similar system boundaries and even some studies for oil (well-to-refinery gate).25–33 This is expected due to the systematic integration of long-overlooked methane emissions from super emitters. We hope this work can emphasize the importance of better characterization of the methane emissions from O&NG systems and call for more methane measurement data inflows utilizing the latest satellite and aerial technology.

A summary of recent GHG emissions LCA studies on O&NG supply chains is presented in Table 13 as well as the result comparison with the current studies.

#

Table 13 Summary of recent GHG emission LCA studies for the oil and natural gas supply chains and comparison with the current study, ordered firstly by category (“natural gas,” “O & NG,” and “Oil”) and secondly by publication date from recent to previous.

| Source | Region | Subject | Subcategory | System boundary | Result CI | Granularity |
| --- | --- | --- | --- | --- | --- | --- |
| This study | US | Natural Gas |  | Well-to-transmission | 15.46 gCO2eq/MJ | Field-specific |
| (Littlefield et al., 2022)20 | US | Natural Gas |  | Well-to-delivery (production, transmission, distribution) | 8.1-13.0 gCO2eq/MJ | Region-specific |
| (Cooper et al., 2021)34 | Multiple countries | Natural Gas |  | Well-to-distribution | 26.4 (14.5-48.2) MMT CH4 | Country-specific |
| (Gan et al., 2020)35 | China | Natural Gas | global gas supply to China | Well-to-city gate | 6.2 - 43.3 gCO2eq/MJ | Field-specific |
| (Zhang et al., 2021)36 | China | Natural Gas | LNG imports to China | Well-to-distribution | 70.5-112.4 gCO2eq/MJ | Country/end use pathway-specific |
| (Nie et al., 2019)37 | Canadian LNG exports to China | Natural Gas | Canadian LNG exports to China | Well-to-distribution | 81-92 gCO2eq/MJ | Country-specific |
| (Kasumu et al., 2018)38 | Multiple countries | Natural Gas | LNG to electricity | Well-to-end use (electricity) | 557-855 gCO2eq/kWh | Country-specific |
| (Abrahams et al., 2015)39 | US | Natural Gas | US LNG exports | Well-to-distribution | 37 gCO2eq/MJ for precombustion for US LNG regasified in Europe and Asia |  |
| (Jiang et al., 2011)24 | US (Marcellus) | Natural Gas | Marcellus shale gas (a type of rock formation in US) | Well-to-combustion | 68 gCO2eq/MJ for preproduction to combustion; ~17. gCO2eq/MJ for preproduction-transmission |  |
| (Venkatesh et al., 2011)40 | US | Natural Gas | NG and LNG to US (domestic and imports) | Well-to-combustion (preproduction like well drilling and completion is not considered) | 66 gCO2eq/MJ per gas consumed in US |  |
| (Contreras et al., 2021)25 | US (Delaware Basin) | O & NG | crude oil and natural gas from Delaware Basin | Well-to-processing | 6.7-10.4 gCO2eq/MJ for upstream |  |
| (Wang et al., 2018)41 | US | O & NG | independent oil and natural gas producers | Production | 8.0-42.9 MMT CO2eq | Producer-specific |
| (El Houjeiri et al., 2018)27 | Saudi | O & NG | heavy fuel oil and marine gas oil produced from Saudi crude oil to LNG globally | Well-to-city gate | 9-25 gCO2eq/MJ | Region-specific |
| (Burnham et al., 2012)28 |  | O & NG | shale gas, natural gas, coal, petroleum | Well-to-wheel | 8-20 gCO2eq/MJ for fuel production (conventional, shale under 100-year GWP) | Fuel production pathway-specific |
| (Meehan et al., 2020)26 | Latin America Region (LAR) | Oil | unconventional oil plays | Well-to-refinery | 10.3 (8.5-15) gCO2eq/MJ | Oil play-specific |
| (Pacheco et al., 2020)29 | Canada | Oil | oil sand partial upgrading technologies | Production | 3.7-12.3 gCO2eq/MJ for different technologies | Production process-specific |
| (Pacheco et al., 2019)30 | Canada | Oil | oil sand technologies | Production | 8-12 gCO2eq/MJ | Production process-specific |
| (Meehan et al., 2018)31 | Asia Pacific | Oil | unconventional oil plays in North America and conventional plays in Asia Pacific | Well-to-refinery entrance gate | 15 (4-22) gCO2eq/MJ country wise | Oil play-specific |
| (Yeh et al., 2017)32 | US (Eagle Ford) | Oil | tight oils from Eagle Ford shale | Well-to-refinery entrance gate | 5.9-30 gCO2eq/MJ |  |
| (Brandt et al., 2016)33 | US (Bakken formation) | Oil | tight oil from Bakken Formation | Well-to-refinery entrance gate | 2-28 gCO2eq/MJ |  |
| (Laurenzi et al., 2016)42 | US (Bakken formation) | Oil | tight oil from Bakken Formation | Well-to-wheel | 89 gCO2eq/MJ for associated gasoline; 90 gCO2eq/MJ for diesel |  |
| (Cai et al., 2015)43 | Canada oil sands production to US | Oil | oil sands | Well-to-wheel | 6.1-27.3 gCO2eq/MJ (extraction, separation, upgrading) | Oil sand project-specific |
| (Charpentier et al., 2011)44 |  | Oil | oil sands technology | Well-to-refinery entrance gate | 9-41 gCO2eq/MJ | Production process-specific |
| (Mui et al., 2010)45 |  | Oil | high CI oil technologies (tar sands, coal, oil shale) | Well-to-tank (no combustion); Well-to-wheel (with combustion) | 94-210 gCO2eq/MJ for WTW | Production pathway-specific |

# Abbreviation and nomenclature

| Abbreviation | Description |
| --- | --- |
| GHG | Greenhous gas |
| O&NG | Oil and natural gas |
| LCA | Life cycle assessment |
| CI | Carbon intensity |
| Upstream | Exploration through processing |
| Midstream | Transmission and storage |
| MMT | Million metric ton |
| CO2eq | Carbon dioxide equivalent |
| US EPA | United States Environmental Protection Agency |
| US EIA | United States Energy Information Agency |
| LNG | Liquefied natural gas |
| NETL | National Energy Technology Laboratory |
| BU | Bottom-up |
| TD | Top-down |
| EF | Emission factor |
| Super emitters | Large point-source methane emission sources |
| OPGEE | Oil Production Greenhouse Gas Emission Estimator |
| BCM | Billion cubic meters |
| GOR | Gas-oil ratio |
| TCF | Trillion cubic feet |
| NMVOC | Non-methane volatile organic compound |
| GWP | Global warming potential |
| LHV | Lower heating value |
| WOR | Water-oil ratio |
| USGS | United States Geographical Survey |
| BOEM | Bureau of Ocean Energy Management |
| Scf | Standard cubic feet |
| GHGI | Greenhouse Gas Inventory (US EPA) |

# References

1. Kansas Geological Survey. Annual data for all operators saved to file.

2. Department of Environment, Great Lakes, and Energy. Michigan Oil, Gas, and Minerals Division Data Explorer.

3. Bureau of Ocean Energy Management. The Federal lease blocks for the GOM OCS Region.

4. Elvidge, C. D., Zhizhin, M., Baugh, K., Hsu, F.-C. & Ghosh, T. Methods for Global Survey of Natural Gas Flaring from Visible Infrared Imaging Radiometer Suite Data. *Energies* **9**, 14 (2016).

5. Elvidge, C. D., Zhizhin, M., Hsu, F.-C. & Baugh, K. E. VIIRS Nightfire: Satellite Pyrometry at Night. *Remote Sens.* **5**, 4423–4449 (2013).

6. Zhizhin, M. *et al.* Measuring Gas Flaring in Russia with Multispectral VIIRS Nightfire. *Remote Sens.* **13**, 3078 (2021).

7. Burdeau, P., Sherwin, E. & Brandt, A. mproving natural gas composition estimates to accurately assess the environmental impacts of methane leaks [working paper]. (2024).

8. Enverus. Drilling Info. https://app.drillinginfo.com/production/#/default.

9. Walker, K. & Rudis, B. tigris: Load Census TIGER/Line Shapefiles. (2024).

10. Pebesma, E. *et al.* sf: Simple Features for R. (2024).

11. Sherwin, E. *et al.* *Quantifying Oil and Natural Gas System Emissions Using One Million Aerial Site Measurements*. https://www.researchsquare.com/article/rs-2406848/v1 (2023) doi:10.21203/rs.3.rs-2406848/v1.

12. Rutherford, J. S. *et al.* Closing the methane gap in US oil and natural gas production emissions inventories. *Nat. Commun.* **12**, 4715 (2021).

13. Gorchov Negron, A. M., Kort, E. A., Conley, S. A. & Smith, M. L. Airborne Assessment of Methane Emissions from Offshore Platforms in the U.S. Gulf of Mexico. *Environ. Sci. Technol.* **54**, 5112–5120 (2020).

14. Zimmerle, D. J. *et al.* Methane Emissions from the Natural Gas Transmission and Storage System in the United States. *Environ. Sci. Technol.* **49**, 9374–9383 (2015).

15. U.S. Energy Information Administration. Monthly Energy Review and Electric Power Monthly. (2024).

16. Electricity in the U.S. - U.S. Energy Information Administration (EIA). https://www.eia.gov/energyexplained/electricity/electricity-in-the-us.php.

17. US Environmental Protection Agency. Natural Gas and Petroleum Systems in the GHG Inventory: Additional Information on the 1990-2020 GHG Inventory (published April 2022). *Annex 3.6* https://www.epa.gov/ghgemissions/natural-gas-and-petroleum-systems-ghg-inventory-additional-information-1990-2020-ghg (2022).

18. US EPA, O. Inventory of U.S. Greenhouse Gas Emissions and Sinks: 1990-2022. https://www.epa.gov/ghgemissions/inventory-us-greenhouse-gas-emissions-and-sinks-1990-2022 (2024).

19. HIFLD. Natural Gas Compressor Stations. Homeland Infrastructure Foundation-Level Data. (2018).

20. Littlefield, J., Rai, S. & Skone, T. J. Life Cycle GHG Perspective on U.S. Natural Gas Delivery Pathways. *Environ. Sci. Technol.* **56**, 16033–16042 (2022).

21. Leontief, W. W. Quantitative Input and Output Relations in the Economic Systems of the United States. *Rev. Econ. Stat.* **18**, 105–125 (1936).

22. Sekhon, R. & Bloom, R. 2.6 Applications - Leontief Models. in *Applied finite mathematics* (Open Textbook Library, 2022).

23. Energy units and calculators explained - U.S. Energy Information Administration (EIA). https://www.eia.gov/energyexplained/units-and-calculators/.

24. Jiang, M. *et al.* Life cycle greenhouse gas emissions of Marcellus shale gas. *Environ. Res. Lett.* **6**, 034014 (2011).

25. Contreras, W. *et al.* Life cycle greenhouse gas emissions of crude oil and natural gas from the Delaware Basin. *J. Clean. Prod.* **328**, 129530 (2021).

26. Meehan, N., Jenvey, N., Datta, A. & Uppati, S. P. Carbon Intensity of Unconventional and Latin American Oil Plays. in.

27. El-Houjeiri, H., Monfort, J.-C., Bouchard, J. & Przesmitzki, S. Life Cycle Assessment of Greenhouse Gas Emissions from Marine Fuels: A Case Study of Saudi Crude Oil versus Natural Gas in Different Global Regions. *J. Ind. Ecol.* **23**, 374–388 (2019).

28. Burnham, A. *et al.* Life-Cycle Greenhouse Gas Emissions of Shale Gas, Natural Gas, Coal, and Petroleum. *Environ. Sci. Technol.* **46**, 619–627 (2012).

29. Pacheco, D. M., Bergerson, J. A. & MacLean, H. L. Modeling Greenhouse Gas Emissions from Oil Sands Partial Upgrading Technologies Using a Life Cycle-Based Model. *Energy Fuels* **34**, 12757–12770 (2020).

30. Pacheco, D. M., Bergerson, J. A., Alvarez-Majmutov, A., Chen, J. & MacLean, H. L. Characterizing Variability in Oil Sands Upgrading Greenhouse Gas Emissions Intensity. *Energy Fuels* **33**, 8907–8919 (2019).

31. Meehan, D. N., El-Houjeiri, H. & Rutherford, J. S. Comparing Carbon Intensity of Unconventional and Asia Pacific Oil Production. in.

32. Yeh, S. *et al.* Energy Intensity and Greenhouse Gas Emissions from Oil Production in the Eagle Ford Shale. *Energy Fuels* **31**, 1440–1449 (2017).

33. Brandt, A. R. *et al.* Energy Intensity and Greenhouse Gas Emissions from Tight Oil Production in the Bakken Formation. *Energy Fuels* **30**, 9613–9621 (2016).

34. Cooper, J., Balcombe, P. & Hawkes, A. The quantification of methane emissions and assessment of emissions data for the largest natural gas supply chains. *J. Clean. Prod.* **320**, 128856 (2021).

35. Gan, Y. *et al.* Carbon footprint of global natural gas supplies to China. *Nat. Commun.* **11**, 824 (2020).

36. Zhang, J., Meerman, H., Benders, R. & Faaij, A. Techno-economic and life cycle greenhouse gas emissions assessment of liquefied natural gas supply chain in China. *Energy* **224**, 120049 (2021).

37. Nie, Y. *et al.* Greenhouse-gas emissions of Canadian liquefied natural gas for use in China: Comparison and synthesis of three independent life cycle assessments. *J. Clean. Prod.* **258**, 120701 (2020).

38. Kasumu, A. S., Li, V., Coleman, J. W., Liendo, J. & Jordaan, S. M. Country-Level Life Cycle Assessment of Greenhouse Gas Emissions from Liquefied Natural Gas Trade for Electricity Generation. *Environ. Sci. Technol.* **52**, 1735–1746 (2018).

39. Abrahams, L. S., Samaras, C., Griffin, W. M. & Matthews, H. S. Life Cycle Greenhouse Gas Emissions From U.S. Liquefied Natural Gas Exports: Implications for End Uses. *Environ. Sci. Technol.* **49**, 3237–3245 (2015).

40. Venkatesh, A., Jaramillo, P., Griffin, W. M. & Matthews, H. S. Uncertainty in Life Cycle Greenhouse Gas Emissions from United States Natural Gas End-Uses and its Effects on Policy. *Environ. Sci. Technol.* **45**, 8182–8189 (2011).

41. Wang, D. & Li, T. Carbon Emission Performance of Independent Oil and Natural Gas Producers in the United States. *Sustainability* **10**, 110 (2018).

42. Laurenzi, I. J., Bergerson, J. A. & Motazedi, K. Life cycle greenhouse gas emissions and freshwater consumption associated with Bakken tight oil. *Proc. Natl. Acad. Sci.* **113**, E7672–E7680 (2016).

43. Cai, H. *et al.* Well-to-Wheels Greenhouse Gas Emissions of Canadian Oil Sands Products: Implications for U.S. Petroleum Fuels. *Environ. Sci. Technol.* **49**, 8219–8227 (2015).

44. Charpentier, A. D., Kofoworola, O., Bergerson, J. A. & MacLean, H. L. Life Cycle Greenhouse Gas Emissions of Current Oil Sands Technologies: GHOST Model Development and Illustrative Application. *Environ. Sci. Technol.* **45**, 9393–9404 (2011).

45. Mui, S., Tonachel, L., McEnaney, B. & Shope, E. GHG Emission Factors for High Carbon Intensity Crude Oils.
